# Supplementary material for: Screening of Genes Related to Sex Determination and Differentiation in Mandarin Fish (Siniperca chuatsi)
Source: Int J Mol Sci. 2022 Jul 12;23(14):7692. doi: 10.3390/ijms23147692 (PMC9321114; doi:10.3390/ijms23147692)
Supplement: Supplementary file 1 [file ijms-23-07692-s001.zip]

Archive with 5 entries (5 files):
- ijms-1774323 Supplementary Figures.pdf
- Supplementary File S1.xls
- Supplementary File S2.xls
- Supplementary File S3.xls
- Supplementary File S4.xls
