# Supplementary material for: Screening of Genes Related to Sex Determination and Differentiation in Mandarin Fish (Siniperca chuatsi)
Source: Int J Mol Sci. 2022 Jul 12;23(14):7692. doi: 10.3390/ijms23147692 (PMC9321114; doi:10.3390/ijms23147692)
Supplement: Supplementary file 1 [file ijms-23-07692-s001.zip › Supplementary File S1.xls]

## Sheet: Index
Supplementary Table S1. The number of genes and non-coding genes (tRNAs/rRNAs/miRNAs/pseudogenes) in female Siniperca chuatsi.
The Index of Supplementary Table S3 were as following:
(1) a. The integrated gene prediction of the chromosome-level genome assembly by multiple softwares.
(2) b. The gene ID list of the chromosome-level genome assembly constructed by Hi-C.
(3) c. The list of non-coding RNAs(tRNA/rRNA/miRNA/pseudogene).
(4) d. The number of coding and non-coding genes on 24 chromosomes in the chromosome-level genome assembly constructed by Hi-C.

## Sheet: a
Supplementary Table S2a. The integrated gene prediction of the chromosome-level genome assembly by multiple softwares.
Method	Software	Species	Gene number
Ab initio	Genscan	-	26938
	Augustus	-	32458
	GlimmerHMM	-	51687
	GeneID	-	22234
	SNAP	-	49012
Homology-based	GeMoMa	Ctenopharyngodon_idellus	23078
		Danio_rerio	21950
		Larimichthys_crocea	22733
		Paralichthys_olivaceus	22874
RNAseq	TransDecoder	-	97446
	GeneMarkS-T	-	60954
	PASA	-	37613
Integration	EVM	-	23946
Note:
Method: the strategy used for gene prediction.
Software: the software used for gene prediction.
Species: species for homology comparision.
Gene number: the number of genes predicted.

## Sheet: b
Supplementary Table S2b. The gene ID list of the chromosome-level genome assembly constructed by Hi-C.
#gene_ID	simplified gene_ID	Chromosome
Schu_LG13G005450	LG13G005450	LG13
Schu_LG13G009660	LG13G009660	LG13
Schu_LG10G006770	LG10G006770	LG10
Schu_LG01G002760	LG01G002760	LG01
Schu_LG08G007350	LG08G007350	LG08
Schu_LG18G001410	LG18G001410	LG18
Schu_LG18G007800	LG18G007800	LG18
Schu_LG21G007450	LG21G007450	LG21
Schu_LG10G006910	LG10G006910	LG10
Schu_LG09G001690	LG09G001690	LG09
Schu_LG24G000150	LG24G000150	LG24
Schu_LG19G003370	LG19G003370	LG19
Schu_LG12G003370	LG12G003370	LG12
Schu_LG23G005440	LG23G005440	LG23
Schu_LG05G010530	LG05G010530	LG05
Schu_LG11G006240	LG11G006240	LG11
Schu_LG16G008770	LG16G008770	LG16
Schu_LG24G002330	LG24G002330	LG24
Schu_LG21G002040	LG21G002040	LG21
Schu_LG07G003200	LG07G003200	LG07
Schu_LG22G004640	LG22G004640	LG22
Schu_LG15G008470	LG15G008470	LG15
Schu_LG07G007810	LG07G007810	LG07
Schu_LG20G002790	LG20G002790	LG20
Schu_LG05G006330	LG05G006330	LG05
Schu_LG20G000450	LG20G000450	LG20
Schu_LG07G009240	LG07G009240	LG07
Schu_LG12G002780	LG12G002780	LG12
Schu_LG24G000590	LG24G000590	LG24
Schu_LG18G002600	LG18G002600	LG18
Schu_LG01G001250	LG01G001250	LG01
Schu_LG11G008830	LG11G008830	LG11
Schu_LG05G001850	LG05G001850	LG05
Schu_LG23G000960	LG23G000960	LG23
Schu_LG07G005030	LG07G005030	LG07
Schu_LG14G007240	LG14G007240	LG14
Schu_LG14G000480	LG14G000480	LG14
Schu_LG13G004430	LG13G004430	LG13
Schu_LG21G002700	LG21G002700	LG21
Schu_LG07G000660	LG07G000660	LG07
Schu_LG23G003590	LG23G003590	LG23
Schu_LG10G011380	LG10G011380	LG10
Schu_LG09G001290	LG09G001290	LG09
Schu_LG12G006130	LG12G006130	LG12
Schu_LG05G007870	LG05G007870	LG05
Schu_LG15G001920	LG15G001920	LG15
Schu_LG02G002770	LG02G002770	LG02
Schu_LG15G009260	LG15G009260	LG15
Schu_LG19G006070	LG19G006070	LG19
Schu_LG03G006230	LG03G006230	LG03
Schu_LG05G000020	LG05G000020	LG05
Schu_LG14G006940	LG14G006940	LG14
Schu_LG11G005760	LG11G005760	LG11
Schu_LG01G000570	LG01G000570	LG01
Schu_LG02G001370	LG02G001370	LG02
Schu_LG16G006120	LG16G006120	LG16
Schu_LG03G005060	LG03G005060	LG03
Schu_LG10G005740	LG10G005740	LG10
Schu_LG08G001910	LG08G001910	LG08
Schu_LG04G005540	LG04G005540	LG04
Schu_LG22G004250	LG22G004250	LG22
Schu_LG16G004980	LG16G004980	LG16
Schu_LG17G002860	LG17G002860	LG17
Schu_LG22G007880	LG22G007880	LG22
Schu_LG08G004660	LG08G004660	LG08
Schu_LG01G009640	LG01G009640	LG01
Schu_LG07G005110	LG07G005110	LG07
Schu_LG12G008430	LG12G008430	LG12
Schu_LG09G004680	LG09G004680	LG09
Schu_LG21G008100	LG21G008100	LG21
Schu_LG13G008280	LG13G008280	LG13
Schu_LG14G005710	LG14G005710	LG14
Schu_LG14G007640	LG14G007640	LG14
Schu_LG14G004630	LG14G004630	LG14
Schu_LG17G005770	LG17G005770	LG17
Schu_LG07G009140	LG07G009140	LG07
Schu_LG16G001540	LG16G001540	LG16
Schu_LG05G002220	LG05G002220	LG05
Schu_LG24G002180	LG24G002180	LG24
Schu_LG04G004580	LG04G004580	LG04
Schu_LG07G008710	LG07G008710	LG07
Schu_LG05G007670	LG05G007670	LG05
Schu_LG06G003040	LG06G003040	LG06
Schu_LG15G007660	LG15G007660	LG15
Schu_LG06G004660	LG06G004660	LG06
Schu_LG06G006090	LG06G006090	LG06
Schu_LG13G004370	LG13G004370	LG13
Schu_LG19G006420	LG19G006420	LG19
Schu_LG11G000360	LG11G000360	LG11
Schu_LG21G002230	LG21G002230	LG21
Schu_LG16G004750	LG16G004750	LG16
Schu_LG02G011400	LG02G011400	LG02
Schu_LG18G004660	LG18G004660	LG18
Schu_LG13G005480	LG13G005480	LG13
Schu_LG01G008400	LG01G008400	LG01
Schu_LG03G012450	LG03G012450	LG03
Schu_LG01G004500	LG01G004500	LG01
Schu_LG02G006170	LG02G006170	LG02
Schu_LG16G006810	LG16G006810	LG16
Schu_LG05G006760	LG05G006760	LG05
Schu_LG03G000360	LG03G000360	LG03
Schu_LG16G001900	LG16G001900	LG16
Schu_LG12G007990	LG12G007990	LG12
Schu_LG02G011190	LG02G011190	LG02
Schu_LG22G007210	LG22G007210	LG22
Schu_LG01G003020	LG01G003020	LG01
Schu_LG16G006750	LG16G006750	LG16
Schu_LG15G004200	LG15G004200	LG15
Schu_LG02G000340	LG02G000340	LG02
Schu_LG08G002000	LG08G002000	LG08
Schu_LG05G002070	LG05G002070	LG05
Schu_LG16G005590	LG16G005590	LG16
Schu_LG12G008400	LG12G008400	LG12
Schu_LG08G004300	LG08G004300	LG08
Schu_LG12G007260	LG12G007260	LG12
Schu_LG21G001450	LG21G001450	LG21
Schu_LG03G001730	LG03G001730	LG03
Schu_LG08G006930	LG08G006930	LG08
Schu_LG10G003530	LG10G003530	LG10
Schu_LG07G004070	LG07G004070	LG07
Schu_LG15G006620	LG15G006620	LG15
Schu_LG09G002610	LG09G002610	LG09
Schu_LG10G004260	LG10G004260	LG10
Schu_LG11G002750	LG11G002750	LG11
Schu_LG20G000490	LG20G000490	LG20
Schu_LG19G002640	LG19G002640	LG19
Schu_LG04G004450	LG04G004450	LG04
Schu_LG16G007200	LG16G007200	LG16
Schu_LG21G009840	LG21G009840	LG21
Schu_LG19G000810	LG19G000810	LG19
Schu_LG12G006900	LG12G006900	LG12
Schu_LG04G001760	LG04G001760	LG04
Schu_LG09G003410	LG09G003410	LG09
Schu_LG10G011720	LG10G011720	LG10
Schu_LG24G000670	LG24G000670	LG24
Schu_LG11G005540	LG11G005540	LG11
Schu_LG14G004200	LG14G004200	LG14
Schu_LG22G005340	LG22G005340	LG22
Schu_LG14G002690	LG14G002690	LG14
Schu_LG10G000550	LG10G000550	LG10
Schu_LG17G007800	LG17G007800	LG17
Schu_LG19G000550	LG19G000550	LG19
Schu_LG04G003800	LG04G003800	LG04
Schu_LG07G002840	LG07G002840	LG07
Schu_LG10G004540	LG10G004540	LG10
Schu_LG14G007520	LG14G007520	LG14
Schu_LG02G007660	LG02G007660	LG02
Schu_LG08G008520	LG08G008520	LG08
Schu_LG20G005030	LG20G005030	LG20
Schu_LG16G000200	LG16G000200	LG16
Schu_LG22G002670	LG22G002670	LG22
Schu_LG14G007970	LG14G007970	LG14
Schu_LG01G003980	LG01G003980	LG01
Schu_LG12G006460	LG12G006460	LG12
Schu_LG13G011150	LG13G011150	LG13
Schu_LG02G003000	LG02G003000	LG02
Schu_LG03G005200	LG03G005200	LG03
Schu_LG13G008290	LG13G008290	LG13
Schu_LG23G001100	LG23G001100	LG23
Schu_LG21G001840	LG21G001840	LG21
Schu_LG20G001700	LG20G001700	LG20
Schu_LG09G009350	LG09G009350	LG09
Schu_LG09G006880	LG09G006880	LG09
Schu_LG19G001520	LG19G001520	LG19
Schu_LG02G007890	LG02G007890	LG02
Schu_LG02G000940	LG02G000940	LG02
Schu_LG11G004050	LG11G004050	LG11
Schu_LG21G006940	LG21G006940	LG21
Schu_LG17G008220	LG17G008220	LG17
Schu_LG07G005230	LG07G005230	LG07
Schu_LG13G007510	LG13G007510	LG13
Schu_LG18G006190	LG18G006190	LG18
Schu_LG16G004110	LG16G004110	LG16
Schu_LG11G007280	LG11G007280	LG11
Schu_LG17G000760	LG17G000760	LG17
Schu_LG17G008240	LG17G008240	LG17
Schu_LG18G003930	LG18G003930	LG18
Schu_LG03G007990	LG03G007990	LG03
Schu_LG07G004810	LG07G004810	LG07
Schu_LG03G002010	LG03G002010	LG03
Schu_LG18G004530	LG18G004530	LG18
Schu_LG21G000400	LG21G000400	LG21
Schu_LG23G005210	LG23G005210	LG23
Schu_LG15G008360	LG15G008360	LG15
Schu_LG10G004490	LG10G004490	LG10
Schu_LG24G000540	LG24G000540	LG24
Schu_LG19G000020	LG19G000020	LG19
Schu_LG08G009590	LG08G009590	LG08
Schu_LG14G002110	LG14G002110	LG14
Schu_LG01G003860	LG01G003860	LG01
Schu_LG14G002610	LG14G002610	LG14
Schu_LG06G008200	LG06G008200	LG06
Schu_LG08G007360	LG08G007360	LG08
Schu_LG20G006600	LG20G006600	LG20
Schu_LG23G002220	LG23G002220	LG23
Schu_LG17G006530	LG17G006530	LG17
Schu_LG02G006020	LG02G006020	LG02
Schu_LG14G009170	LG14G009170	LG14
Schu_LG17G002930	LG17G002930	LG17
Schu_LG21G006260	LG21G006260	LG21
Schu_LG02G004240	LG02G004240	LG02
Schu_LG09G001080	LG09G001080	LG09
Schu_LG19G002980	LG19G002980	LG19
Schu_LG14G006460	LG14G006460	LG14
Schu_LG14G002040	LG14G002040	LG14
Schu_LG08G002740	LG08G002740	LG08
Schu_LG12G000220	LG12G000220	LG12
Schu_LG22G007370	LG22G007370	LG22
Schu_LG04G009320	LG04G009320	LG04
Schu_LG15G002230	LG15G002230	LG15
Schu_LG24G002690	LG24G002690	LG24
Schu_LG02G000090	LG02G000090	LG02
Schu_LG18G003120	LG18G003120	LG18
Schu_LG07G002280	LG07G002280	LG07
Schu_LG09G009420	LG09G009420	LG09
Schu_LG09G003210	LG09G003210	LG09
Schu_LG12G001640	LG12G001640	LG12
Schu_LG06G005810	LG06G005810	LG06
Schu_LG09G001580	LG09G001580	LG09
Schu_LG09G003920	LG09G003920	LG09
Schu_LG07G000110	LG07G000110	LG07
Schu_LG12G003900	LG12G003900	LG12
Schu_LG19G001920	LG19G001920	LG19
Schu_LG13G010660	LG13G010660	LG13
Schu_LG10G005100	LG10G005100	LG10
Schu_LG06G008680	LG06G008680	LG06
Schu_LG06G007390	LG06G007390	LG06
Schu_LG16G002590	LG16G002590	LG16
Schu_LG06G010320	LG06G010320	LG06
Schu_LG05G009100	LG05G009100	LG05
Schu_LG02G008490	LG02G008490	LG02
Schu_LG16G006210	LG16G006210	LG16
Schu_LG13G009610	LG13G009610	LG13
Schu_LG13G003750	LG13G003750	LG13
Schu_LG20G004860	LG20G004860	LG20
Schu_LG22G002040	LG22G002040	LG22
Schu_LG19G006260	LG19G006260	LG19
Schu_LG12G002200	LG12G002200	LG12
Schu_LG17G009030	LG17G009030	LG17
Schu_LG08G001610	LG08G001610	LG08
Schu_LG03G004730	LG03G004730	LG03
Schu_LG02G011720	LG02G011720	LG02
Schu_LG16G001470	LG16G001470	LG16
Schu_LG10G000080	LG10G000080	LG10
Schu_LG03G001310	LG03G001310	LG03
Schu_LG19G004890	LG19G004890	LG19
Schu_LG15G000140	LG15G000140	LG15
Schu_LG12G007250	LG12G007250	LG12
Schu_LG17G006860	LG17G006860	LG17
Schu_LG22G002120	LG22G002120	LG22
Schu_LG17G001210	LG17G001210	LG17
Schu_LG12G000380	LG12G000380	LG12
Schu_LG08G003250	LG08G003250	LG08
Schu_LG12G004140	LG12G004140	LG12
Schu_LG13G011010	LG13G011010	LG13
Schu_LG22G008030	LG22G008030	LG22
Schu_LG12G004090	LG12G004090	LG12
Schu_LG19G000780	LG19G000780	LG19
Schu_LG13G007010	LG13G007010	LG13
Schu_LG08G007220	LG08G007220	LG08
Schu_LG04G004820	LG04G004820	LG04
Schu_LG01G004430	LG01G004430	LG01
Schu_LG03G010580	LG03G010580	LG03
Schu_LG09G011440	LG09G011440	LG09
Schu_LG10G006700	LG10G006700	LG10
Schu_LG03G001090	LG03G001090	LG03
Schu_LG19G002720	LG19G002720	LG19
Schu_LG06G004670	LG06G004670	LG06
Schu_LG04G007350	LG04G007350	LG04
Schu_LG11G006900	LG11G006900	LG11
Schu_LG20G006800	LG20G006800	LG20
Schu_LG12G001800	LG12G001800	LG12
Schu_LG22G004530	LG22G004530	LG22
Schu_LG04G005230	LG04G005230	LG04
Schu_LG10G004840	LG10G004840	LG10
Schu_LG23G005800	LG23G005800	LG23
Schu_LG10G010010	LG10G010010	LG10
Schu_LG04G010620	LG04G010620	LG04
Schu_LG21G002600	LG21G002600	LG21
Schu_LG07G002470	LG07G002470	LG07
Schu_LG16G005460	LG16G005460	LG16
Schu_LG21G007260	LG21G007260	LG21
Schu_LG14G000050	LG14G000050	LG14
Schu_LG21G009050	LG21G009050	LG21
Schu_LG07G009910	LG07G009910	LG07
Schu_LG19G005430	LG19G005430	LG19
Schu_LG14G005440	LG14G005440	LG14
Schu_LG04G000020	LG04G000020	LG04
Schu_LG16G002840	LG16G002840	LG16
Schu_LG05G004480	LG05G004480	LG05
Schu_LG17G009470	LG17G009470	LG17
Schu_LG07G001800	LG07G001800	LG07
Schu_LG18G003590	LG18G003590	LG18
Schu_LG13G010130	LG13G010130	LG13
Schu_LG12G003010	LG12G003010	LG12
Schu_LG18G007450	LG18G007450	LG18
Schu_LG10G001910	LG10G001910	LG10
Schu_LG01G009320	LG01G009320	LG01
Schu_LG17G008280	LG17G008280	LG17
Schu_LG16G003870	LG16G003870	LG16
Schu_LG09G007220	LG09G007220	LG09
Schu_LG03G002000	LG03G002000	LG03
Schu_LG08G007390	LG08G007390	LG08
Schu_LG04G000510	LG04G000510	LG04
Schu_LG20G000640	LG20G000640	LG20
Schu_LG09G006100	LG09G006100	LG09
Schu_LG04G008540	LG04G008540	LG04
Schu_LG15G007770	LG15G007770	LG15
Schu_LG05G010370	LG05G010370	LG05
Schu_LG18G003430	LG18G003430	LG18
Schu_LG13G004640	LG13G004640	LG13
Schu_LG23G000790	LG23G000790	LG23
Schu_LG14G001700	LG14G001700	LG14
Schu_LG23G005390	LG23G005390	LG23
Schu_LG24G004790	LG24G004790	LG24
Schu_LG16G006390	LG16G006390	LG16
Schu_LG05G001020	LG05G001020	LG05
Schu_LG04G005470	LG04G005470	LG04
Schu_LG21G004790	LG21G004790	LG21
Schu_LG13G009890	LG13G009890	LG13
Schu_LG21G005400	LG21G005400	LG21
Schu_LG20G005650	LG20G005650	LG20
Schu_LG03G005670	LG03G005670	LG03
Schu_LG03G011790	LG03G011790	LG03
Schu_LG17G004760	LG17G004760	LG17
Schu_LG19G006170	LG19G006170	LG19
Schu_LG11G003670	LG11G003670	LG11
Schu_LG08G008420	LG08G008420	LG08
Schu_LG09G005660	LG09G005660	LG09
Schu_LG02G007370	LG02G007370	LG02
Schu_LG02G008080	LG02G008080	LG02
Schu_LG18G008760	LG18G008760	LG18
Schu_LG17G003090	LG17G003090	LG17
Schu_LG10G008430	LG10G008430	LG10
Schu_LG03G003110	LG03G003110	LG03
Schu_LG09G010950	LG09G010950	LG09
Schu_LG06G002100	LG06G002100	LG06
Schu_LG19G001260	LG19G001260	LG19
Schu_LG09G006650	LG09G006650	LG09
Schu_LG01G005150	LG01G005150	LG01
Schu_LG02G005110	LG02G005110	LG02
Schu_LG03G009820	LG03G009820	LG03
Schu_LG12G003090	LG12G003090	LG12
Schu_LG17G007960	LG17G007960	LG17
Schu_LG02G010220	LG02G010220	LG02
Schu_LG17G006670	LG17G006670	LG17
Schu_LG14G006140	LG14G006140	LG14
Schu_LG13G002430	LG13G002430	LG13
Schu_LG22G000430	LG22G000430	LG22
Schu_LG11G000550	LG11G000550	LG11
Schu_LG13G007890	LG13G007890	LG13
Schu_LG04G009860	LG04G009860	LG04
Schu_LG05G002310	LG05G002310	LG05
Schu_LG03G008060	LG03G008060	LG03
Schu_LG21G010350	LG21G010350	LG21
Schu_LG22G004620	LG22G004620	LG22
Schu_LG03G000170	LG03G000170	LG03
Schu_LG19G000640	LG19G000640	LG19
Schu_LG22G007920	LG22G007920	LG22
Schu_LG13G000940	LG13G000940	LG13
Schu_LG22G002870	LG22G002870	LG22
Schu_LG05G008610	LG05G008610	LG05
Schu_LG11G004320	LG11G004320	LG11
Schu_LG20G008940	LG20G008940	LG20
Schu_LG12G007330	LG12G007330	LG12
Schu_LG16G002490	LG16G002490	LG16
Schu_LG10G006870	LG10G006870	LG10
Schu_LG06G010530	LG06G010530	LG06
Schu_LG18G000050	LG18G000050	LG18
Schu_LG15G005870	LG15G005870	LG15
Schu_LG20G004180	LG20G004180	LG20
Schu_LG13G001620	LG13G001620	LG13
Schu_LG05G001960	LG05G001960	LG05
Schu_LG23G000770	LG23G000770	LG23
Schu_LG07G001580	LG07G001580	LG07
Schu_LG12G007500	LG12G007500	LG12
Schu_LG09G005650	LG09G005650	LG09
Schu_LG12G008150	LG12G008150	LG12
Schu_LG07G007460	LG07G007460	LG07
Schu_LG15G001200	LG15G001200	LG15
Schu_LG05G000310	LG05G000310	LG05
Schu_LG08G000480	LG08G000480	LG08
Schu_LG19G005490	LG19G005490	LG19
Schu_LG14G004010	LG14G004010	LG14
Schu_LG08G001510	LG08G001510	LG08
Schu_LG03G008640	LG03G008640	LG03
Schu_LG02G008750	LG02G008750	LG02
Schu_LG14G009360	LG14G009360	LG14
Schu_LG16G007360	LG16G007360	LG16
Schu_LG02G000490	LG02G000490	LG02
Schu_LG11G006360	LG11G006360	LG11
Schu_LG21G006650	LG21G006650	LG21
Schu_LG13G004790	LG13G004790	LG13
Schu_LG13G006680	LG13G006680	LG13
Schu_LG10G005020	LG10G005020	LG10
Schu_LG10G004970	LG10G004970	LG10
Schu_LG07G005100	LG07G005100	LG07
Schu_LG09G007280	LG09G007280	LG09
Schu_LG07G006580	LG07G006580	LG07
Schu_LG11G004530	LG11G004530	LG11
Schu_LG01G003620	LG01G003620	LG01
Schu_LG09G008890	LG09G008890	LG09
Schu_LG08G003130	LG08G003130	LG08
Schu_LG10G003590	LG10G003590	LG10
Schu_LG20G003810	LG20G003810	LG20
Schu_LG05G005080	LG05G005080	LG05
Schu_LG07G000450	LG07G000450	LG07
Schu_LG07G008850	LG07G008850	LG07
Schu_LG14G008900	LG14G008900	LG14
Schu_LG05G009920	LG05G009920	LG05
Schu_LG24G000400	LG24G000400	LG24
Schu_LG06G007830	LG06G007830	LG06
Schu_LG04G007050	LG04G007050	LG04
Schu_LG02G001210	LG02G001210	LG02
Schu_LG08G003270	LG08G003270	LG08
Schu_LG01G007490	LG01G007490	LG01
Schu_LG10G011430	LG10G011430	LG10
Schu_LG15G002660	LG15G002660	LG15
Schu_LG16G005520	LG16G005520	LG16
Schu_LG16G002700	LG16G002700	LG16
Schu_LG23G004870	LG23G004870	LG23
Schu_LG18G001040	LG18G001040	LG18
Schu_LG03G007920	LG03G007920	LG03
Schu_LG03G009450	LG03G009450	LG03
Schu_LG10G006650	LG10G006650	LG10
Schu_LG12G002110	LG12G002110	LG12
Schu_LG11G000570	LG11G000570	LG11
Schu_LG07G005920	LG07G005920	LG07
Schu_LG18G000820	LG18G000820	LG18
Schu_LG19G006400	LG19G006400	LG19
Schu_LG03G007320	LG03G007320	LG03
Schu_LG09G004580	LG09G004580	LG09
Schu_LG10G011370	LG10G011370	LG10
Schu_LG17G006340	LG17G006340	LG17
Schu_LG06G007250	LG06G007250	LG06
Schu_LG14G003320	LG14G003320	LG14
Schu_LG22G007730	LG22G007730	LG22
Schu_LG12G007750	LG12G007750	LG12
Schu_LG09G005470	LG09G005470	LG09
Schu_LG07G008580	LG07G008580	LG07
Schu_LG02G002490	LG02G002490	LG02
Schu_LG09G000420	LG09G000420	LG09
Schu_LG21G000300	LG21G000300	LG21
Schu_LG08G006760	LG08G006760	LG08
Schu_LG03G006570	LG03G006570	LG03
Schu_LG18G005470	LG18G005470	LG18
Schu_LG07G001710	LG07G001710	LG07
Schu_LG07G003320	LG07G003320	LG07
Schu_LG12G007090	LG12G007090	LG12
Schu_LG11G007230	LG11G007230	LG11
Schu_LG07G006330	LG07G006330	LG07
Schu_LG14G003000	LG14G003000	LG14
Schu_LG21G002130	LG21G002130	LG21
Schu_LG15G008130	LG15G008130	LG15
Schu_LG05G007970	LG05G007970	LG05
Schu_LG05G011010	LG05G011010	LG05
Schu_LG02G001530	LG02G001530	LG02
Schu_LG09G008470	LG09G008470	LG09
Schu_LG07G001390	LG07G001390	LG07
Schu_LG21G003550	LG21G003550	LG21
Schu_LG15G007010	LG15G007010	LG15
Schu_LG10G006400	LG10G006400	LG10
Schu_LG22G008210	LG22G008210	LG22
Schu_LG22G006260	LG22G006260	LG22
Schu_LG20G002270	LG20G002270	LG20
Schu_LG17G008500	LG17G008500	LG17
Schu_LG22G005990	LG22G005990	LG22
Schu_LG13G011360	LG13G011360	LG13
Schu_LG19G002420	LG19G002420	LG19
Schu_LG03G008240	LG03G008240	LG03
Schu_LG08G002030	LG08G002030	LG08
Schu_LG03G003840	LG03G003840	LG03
Schu_LG14G009710	LG14G009710	LG14
Schu_LG21G002890	LG21G002890	LG21
Schu_LG13G010790	LG13G010790	LG13
Schu_LG09G001880	LG09G001880	LG09
Schu_LG08G004730	LG08G004730	LG08
Schu_LG24G002570	LG24G002570	LG24
Schu_LG18G007400	LG18G007400	LG18
Schu_LG24G004360	LG24G004360	LG24
Schu_LG14G007800	LG14G007800	LG14
Schu_LG12G001970	LG12G001970	LG12
Schu_LG11G005310	LG11G005310	LG11
Schu_LG03G003640	LG03G003640	LG03
Schu_LG14G008920	LG14G008920	LG14
Schu_LG11G003660	LG11G003660	LG11
Schu_LG18G002880	LG18G002880	LG18
Schu_LG09G006120	LG09G006120	LG09
Schu_LG22G004930	LG22G004930	LG22
Schu_LG17G007810	LG17G007810	LG17
Schu_LG02G007740	LG02G007740	LG02
Schu_LG21G001220	LG21G001220	LG21
Schu_LG12G005270	LG12G005270	LG12
Schu_LG16G004490	LG16G004490	LG16
Schu_LG09G001360	LG09G001360	LG09
Schu_LG05G007210	LG05G007210	LG05
Schu_LG13G009050	LG13G009050	LG13
Schu_LG02G003350	LG02G003350	LG02
Schu_LG09G001720	LG09G001720	LG09
Schu_LG05G008520	LG05G008520	LG05
Schu_LG02G003030	LG02G003030	LG02
Schu_LG05G002600	LG05G002600	LG05
Schu_LG01G004320	LG01G004320	LG01
Schu_LG22G001510	LG22G001510	LG22
Schu_LG03G007880	LG03G007880	LG03
Schu_LG12G003850	LG12G003850	LG12
Schu_LG19G001300	LG19G001300	LG19
Schu_LG02G003860	LG02G003860	LG02
Schu_LG17G005020	LG17G005020	LG17
Schu_LG12G002830	LG12G002830	LG12
Schu_LG15G006350	LG15G006350	LG15
Schu_LG02G009890	LG02G009890	LG02
Schu_LG19G005290	LG19G005290	LG19
Schu_LG04G002100	LG04G002100	LG04
Schu_LG07G001000	LG07G001000	LG07
Schu_LG13G002400	LG13G002400	LG13
Schu_LG05G002110	LG05G002110	LG05
Schu_LG20G006730	LG20G006730	LG20
Schu_LG09G007010	LG09G007010	LG09
Schu_LG04G011040	LG04G011040	LG04
Schu_LG23G000230	LG23G000230	LG23
Schu_LG18G008180	LG18G008180	LG18
Schu_LG15G002620	LG15G002620	LG15
Schu_LG04G004290	LG04G004290	LG04
Schu_LG24G003510	LG24G003510	LG24
Schu_LG05G006090	LG05G006090	LG05
Schu_LG10G008230	LG10G008230	LG10
Schu_LG12G006530	LG12G006530	LG12
Schu_LG04G011230	LG04G011230	LG04
Schu_LG10G000620	LG10G000620	LG10
Schu_LG06G005380	LG06G005380	LG06
Schu_LG21G004500	LG21G004500	LG21
Schu_LG02G000620	LG02G000620	LG02
Schu_LG20G006420	LG20G006420	LG20
Schu_LG11G008560	LG11G008560	LG11
Schu_LG08G007680	LG08G007680	LG08
Schu_LG08G003340	LG08G003340	LG08
Schu_LG19G002740	LG19G002740	LG19
Schu_LG17G002070	LG17G002070	LG17
Schu_LG04G004720	LG04G004720	LG04
Schu_LG22G000020	LG22G000020	LG22
Schu_LG15G005960	LG15G005960	LG15
Schu_LG15G006460	LG15G006460	LG15
Schu_LG02G007070	LG02G007070	LG02
Schu_LG17G007780	LG17G007780	LG17
Schu_LG08G000240	LG08G000240	LG08
Schu_LG11G002710	LG11G002710	LG11
Schu_LG19G005960	LG19G005960	LG19
Schu_LG20G001160	LG20G001160	LG20
Schu_LG03G004740	LG03G004740	LG03
Schu_LG01G000650	LG01G000650	LG01
Schu_LG04G000060	LG04G000060	LG04
Schu_LG14G002660	LG14G002660	LG14
Schu_LG06G005500	LG06G005500	LG06
Schu_LG03G004640	LG03G004640	LG03
Schu_LG22G005040	LG22G005040	LG22
Schu_LG09G004800	LG09G004800	LG09
Schu_LG21G007330	LG21G007330	LG21
Schu_LG10G011230	LG10G011230	LG10
Schu_LG18G000160	LG18G000160	LG18
Schu_LG07G000430	LG07G000430	LG07
Schu_LG05G007030	LG05G007030	LG05
Schu_LG01G009570	LG01G009570	LG01
Schu_LG24G000470	LG24G000470	LG24
Schu_LG07G005960	LG07G005960	LG07
Schu_LG03G009010	LG03G009010	LG03
Schu_LG24G002770	LG24G002770	LG24
Schu_LG13G001840	LG13G001840	LG13
Schu_LG02G002650	LG02G002650	LG02
Schu_LG03G003660	LG03G003660	LG03
Schu_LG20G008520	LG20G008520	LG20
Schu_LG20G004070	LG20G004070	LG20
Schu_LG19G007340	LG19G007340	LG19
Schu_LG09G001270	LG09G001270	LG09
Schu_LG21G004440	LG21G004440	LG21
Schu_LG21G008750	LG21G008750	LG21
Schu_LG12G009170	LG12G009170	LG12
Schu_LG16G007030	LG16G007030	LG16
Schu_LG11G001800	LG11G001800	LG11
Schu_LG17G005030	LG17G005030	LG17
Schu_LG02G001720	LG02G001720	LG02
Schu_LG21G003790	LG21G003790	LG21
Schu_LG12G004720	LG12G004720	LG12
Schu_LG20G003510	LG20G003510	LG20
Schu_LG15G003530	LG15G003530	LG15
Schu_Contig00088G000010	Contig00088G000010	Contig00088G000010
Schu_LG21G003870	LG21G003870	LG21
Schu_LG06G008100	LG06G008100	LG06
Schu_LG13G004900	LG13G004900	LG13
Schu_LG03G003760	LG03G003760	LG03
Schu_LG10G005620	LG10G005620	LG10
Schu_LG05G004790	LG05G004790	LG05
Schu_LG15G002370	LG15G002370	LG15
Schu_LG02G009820	LG02G009820	LG02
Schu_LG23G001780	LG23G001780	LG23
Schu_LG09G007530	LG09G007530	LG09
Schu_LG07G001460	LG07G001460	LG07
Schu_LG12G007790	LG12G007790	LG12
Schu_LG14G001470	LG14G001470	LG14
Schu_LG12G009250	LG12G009250	LG12
Schu_LG18G004700	LG18G004700	LG18
Schu_LG16G004930	LG16G004930	LG16
Schu_LG04G011100	LG04G011100	LG04
Schu_LG21G003130	LG21G003130	LG21
Schu_LG12G005980	LG12G005980	LG12
Schu_LG01G004470	LG01G004470	LG01
Schu_LG14G008690	LG14G008690	LG14
Schu_LG14G001400	LG14G001400	LG14
Schu_LG06G006150	LG06G006150	LG06
Schu_LG20G002530	LG20G002530	LG20
Schu_LG06G005820	LG06G005820	LG06
Schu_LG08G005720	LG08G005720	LG08
Schu_LG13G007560	LG13G007560	LG13
Schu_LG23G000050	LG23G000050	LG23
Schu_LG19G005000	LG19G005000	LG19
Schu_LG21G001670	LG21G001670	LG21
Schu_LG18G005460	LG18G005460	LG18
Schu_LG17G005720	LG17G005720	LG17
Schu_LG05G007900	LG05G007900	LG05
Schu_LG09G002360	LG09G002360	LG09
Schu_LG18G004560	LG18G004560	LG18
Schu_LG09G005420	LG09G005420	LG09
Schu_LG05G005170	LG05G005170	LG05
Schu_LG21G005510	LG21G005510	LG21
Schu_LG07G007770	LG07G007770	LG07
Schu_LG01G003720	LG01G003720	LG01
Schu_LG20G001380	LG20G001380	LG20
Schu_LG24G003780	LG24G003780	LG24
Schu_LG21G010430	LG21G010430	LG21
Schu_LG22G000310	LG22G000310	LG22
Schu_LG10G004780	LG10G004780	LG10
Schu_LG17G004900	LG17G004900	LG17
Schu_LG06G008590	LG06G008590	LG06
Schu_LG06G009070	LG06G009070	LG06
Schu_LG23G001620	LG23G001620	LG23
Schu_LG13G010350	LG13G010350	LG13
Schu_LG16G004830	LG16G004830	LG16
Schu_LG20G009040	LG20G009040	LG20
Schu_LG02G011650	LG02G011650	LG02
Schu_LG07G006300	LG07G006300	LG07
Schu_LG20G004590	LG20G004590	LG20
Schu_LG11G000820	LG11G000820	LG11
Schu_LG10G008490	LG10G008490	LG10
Schu_LG23G001550	LG23G001550	LG23
Schu_LG09G010620	LG09G010620	LG09
Schu_LG16G002220	LG16G002220	LG16
Schu_LG12G006710	LG12G006710	LG12
Schu_LG10G006780	LG10G006780	LG10
Schu_LG08G007100	LG08G007100	LG08
Schu_LG12G005670	LG12G005670	LG12
Schu_LG08G005760	LG08G005760	LG08
Schu_LG06G007010	LG06G007010	LG06
Schu_LG17G003450	LG17G003450	LG17
Schu_LG11G001850	LG11G001850	LG11
Schu_LG12G006550	LG12G006550	LG12
Schu_LG05G006640	LG05G006640	LG05
Schu_LG14G003150	LG14G003150	LG14
Schu_LG17G007190	LG17G007190	LG17
Schu_LG18G001740	LG18G001740	LG18
Schu_LG21G001540	LG21G001540	LG21
Schu_LG16G002310	LG16G002310	LG16
Schu_LG10G000070	LG10G000070	LG10
Schu_LG07G003100	LG07G003100	LG07
Schu_LG22G007130	LG22G007130	LG22
Schu_LG10G003360	LG10G003360	LG10
Schu_LG20G004720	LG20G004720	LG20
Schu_LG11G000530	LG11G000530	LG11
Schu_LG10G010980	LG10G010980	LG10
Schu_LG10G011420	LG10G011420	LG10
Schu_LG21G009680	LG21G009680	LG21
Schu_LG13G009180	LG13G009180	LG13
Schu_LG05G007320	LG05G007320	LG05
Schu_LG19G000170	LG19G000170	LG19
Schu_LG08G002930	LG08G002930	LG08
Schu_LG06G010660	LG06G010660	LG06
Schu_LG13G008640	LG13G008640	LG13
Schu_LG18G008080	LG18G008080	LG18
Schu_LG17G006680	LG17G006680	LG17
Schu_LG18G005500	LG18G005500	LG18
Schu_LG24G003640	LG24G003640	LG24
Schu_LG09G007880	LG09G007880	LG09
Schu_LG04G009150	LG04G009150	LG04
Schu_LG15G004100	LG15G004100	LG15
Schu_LG22G000100	LG22G000100	LG22
Schu_LG07G001600	LG07G001600	LG07
Schu_LG05G003370	LG05G003370	LG05
Schu_LG06G005150	LG06G005150	LG06
Schu_LG20G005930	LG20G005930	LG20
Schu_LG07G004620	LG07G004620	LG07
Schu_LG01G006770	LG01G006770	LG01
Schu_LG05G010670	LG05G010670	LG05
Schu_LG20G006020	LG20G006020	LG20
Schu_LG12G002850	LG12G002850	LG12
Schu_LG23G002260	LG23G002260	LG23
Schu_LG03G008410	LG03G008410	LG03
Schu_LG09G005860	LG09G005860	LG09
Schu_LG24G004070	LG24G004070	LG24
Schu_LG19G007000	LG19G007000	LG19
Schu_LG01G003370	LG01G003370	LG01
Schu_LG22G001700	LG22G001700	LG22
Schu_LG12G003860	LG12G003860	LG12
Schu_LG02G004650	LG02G004650	LG02
Schu_LG06G009110	LG06G009110	LG06
Schu_LG03G000680	LG03G000680	LG03
Schu_LG05G001150	LG05G001150	LG05
Schu_LG18G007040	LG18G007040	LG18
Schu_LG18G001230	LG18G001230	LG18
Schu_LG18G001580	LG18G001580	LG18
Schu_LG04G000910	LG04G000910	LG04
Schu_LG02G009120	LG02G009120	LG02
Schu_LG02G008410	LG02G008410	LG02
Schu_LG22G004090	LG22G004090	LG22
Schu_LG02G001950	LG02G001950	LG02
Schu_LG03G004630	LG03G004630	LG03
Schu_LG01G000890	LG01G000890	LG01
Schu_LG22G001260	LG22G001260	LG22
Schu_LG03G001080	LG03G001080	LG03
Schu_LG20G005620	LG20G005620	LG20
Schu_LG02G008650	LG02G008650	LG02
Schu_LG08G006010	LG08G006010	LG08
Schu_LG23G006170	LG23G006170	LG23
Schu_LG02G006960	LG02G006960	LG02
Schu_LG16G003770	LG16G003770	LG16
Schu_LG20G003910	LG20G003910	LG20
Schu_LG06G010350	LG06G010350	LG06
Schu_LG04G000380	LG04G000380	LG04
Schu_LG04G008200	LG04G008200	LG04
Schu_LG02G008440	LG02G008440	LG02
Schu_LG07G002620	LG07G002620	LG07
Schu_LG10G008450	LG10G008450	LG10
Schu_LG07G010480	LG07G010480	LG07
Schu_LG13G008120	LG13G008120	LG13
Schu_LG06G001810	LG06G001810	LG06
Schu_LG22G004820	LG22G004820	LG22
Schu_LG02G005650	LG02G005650	LG02
Schu_LG05G007700	LG05G007700	LG05
Schu_LG09G009820	LG09G009820	LG09
Schu_LG23G000750	LG23G000750	LG23
Schu_LG24G001040	LG24G001040	LG24
Schu_LG20G009350	LG20G009350	LG20
Schu_LG02G010320	LG02G010320	LG02
Schu_LG23G001420	LG23G001420	LG23
Schu_LG01G003090	LG01G003090	LG01
Schu_LG04G006490	LG04G006490	LG04
Schu_LG04G010860	LG04G010860	LG04
Schu_LG23G003730	LG23G003730	LG23
Schu_LG11G004160	LG11G004160	LG11
Schu_LG11G006080	LG11G006080	LG11
Schu_LG24G001970	LG24G001970	LG24
Schu_LG13G002760	LG13G002760	LG13
Schu_LG03G006330	LG03G006330	LG03
Schu_LG10G003380	LG10G003380	LG10
Schu_LG10G009680	LG10G009680	LG10
Schu_LG19G001150	LG19G001150	LG19
Schu_LG24G002910	LG24G002910	LG24
Schu_LG11G000230	LG11G000230	LG11
Schu_LG10G006540	LG10G006540	LG10
Schu_LG01G003400	LG01G003400	LG01
Schu_LG10G009760	LG10G009760	LG10
Schu_LG13G003130	LG13G003130	LG13
Schu_LG13G007390	LG13G007390	LG13
Schu_LG19G000160	LG19G000160	LG19
Schu_LG20G003590	LG20G003590	LG20
Schu_LG03G004540	LG03G004540	LG03
Schu_LG06G001890	LG06G001890	LG06
Schu_LG24G000760	LG24G000760	LG24
Schu_LG04G007840	LG04G007840	LG04
Schu_LG19G005010	LG19G005010	LG19
Schu_LG08G005900	LG08G005900	LG08
Schu_LG02G012040	LG02G012040	LG02
Schu_LG08G000670	LG08G000670	LG08
Schu_LG04G002940	LG04G002940	LG04
Schu_LG11G006490	LG11G006490	LG11
Schu_LG10G011750	LG10G011750	LG10
Schu_LG02G005460	LG02G005460	LG02
Schu_LG05G009880	LG05G009880	LG05
Schu_LG20G001320	LG20G001320	LG20
Schu_LG24G000690	LG24G000690	LG24
Schu_Contig00086G000020	Contig00086G000020	Contig00086G000020
Schu_LG16G007510	LG16G007510	LG16
Schu_LG19G006230	LG19G006230	LG19
Schu_LG11G004750	LG11G004750	LG11
Schu_LG22G005880	LG22G005880	LG22
Schu_LG16G005610	LG16G005610	LG16
Schu_LG05G008280	LG05G008280	LG05
Schu_LG08G003580	LG08G003580	LG08
Schu_LG14G009160	LG14G009160	LG14
Schu_LG12G006060	LG12G006060	LG12
Schu_LG06G003530	LG06G003530	LG06
Schu_LG12G002160	LG12G002160	LG12
Schu_LG17G007910	LG17G007910	LG17
Schu_LG21G004680	LG21G004680	LG21
Schu_LG01G009290	LG01G009290	LG01
Schu_LG10G005870	LG10G005870	LG10
Schu_LG09G000940	LG09G000940	LG09
Schu_LG08G002410	LG08G002410	LG08
Schu_LG17G006490	LG17G006490	LG17
Schu_LG10G007540	LG10G007540	LG10
Schu_LG14G008830	LG14G008830	LG14
Schu_LG20G000840	LG20G000840	LG20
Schu_LG21G001730	LG21G001730	LG21
Schu_LG01G007180	LG01G007180	LG01
Schu_LG03G005440	LG03G005440	LG03
Schu_LG01G000660	LG01G000660	LG01
Schu_LG12G001060	LG12G001060	LG12
Schu_LG04G011300	LG04G011300	LG04
Schu_LG22G001980	LG22G001980	LG22
Schu_LG05G009950	LG05G009950	LG05
Schu_LG11G002550	LG11G002550	LG11
Schu_LG20G002370	LG20G002370	LG20
Schu_LG16G000560	LG16G000560	LG16
Schu_LG12G004400	LG12G004400	LG12
Schu_LG07G005620	LG07G005620	LG07
Schu_LG17G007630	LG17G007630	LG17
Schu_LG01G001150	LG01G001150	LG01
Schu_LG10G005520	LG10G005520	LG10
Schu_LG17G006470	LG17G006470	LG17
Schu_LG07G007520	LG07G007520	LG07
Schu_LG02G001620	LG02G001620	LG02
Schu_LG09G001560	LG09G001560	LG09
Schu_LG04G008610	LG04G008610	LG04
Schu_LG07G003570	LG07G003570	LG07
Schu_LG09G004760	LG09G004760	LG09
Schu_LG17G009260	LG17G009260	LG17
Schu_LG04G011160	LG04G011160	LG04
Schu_LG04G005580	LG04G005580	LG04
Schu_LG02G003080	LG02G003080	LG02
Schu_LG14G005970	LG14G005970	LG14
Schu_LG02G005020	LG02G005020	LG02
Schu_LG15G006160	LG15G006160	LG15
Schu_LG18G001810	LG18G001810	LG18
Schu_LG20G004080	LG20G004080	LG20
Schu_LG15G007150	LG15G007150	LG15
Schu_LG09G003000	LG09G003000	LG09
Schu_LG03G010000	LG03G010000	LG03
Schu_LG17G006830	LG17G006830	LG17
Schu_LG04G000110	LG04G000110	LG04
Schu_LG08G005040	LG08G005040	LG08
Schu_LG01G004870	LG01G004870	LG01
Schu_LG11G007220	LG11G007220	LG11
Schu_LG09G004740	LG09G004740	LG09
Schu_LG12G002760	LG12G002760	LG12
Schu_LG07G002310	LG07G002310	LG07
Schu_LG19G000960	LG19G000960	LG19
Schu_LG22G007330	LG22G007330	LG22
Schu_LG02G005010	LG02G005010	LG02
Schu_LG23G006150	LG23G006150	LG23
Schu_LG02G010030	LG02G010030	LG02
Schu_LG16G007580	LG16G007580	LG16
Schu_LG13G005590	LG13G005590	LG13
Schu_LG05G005430	LG05G005430	LG05
Schu_LG13G006470	LG13G006470	LG13
Schu_LG20G009250	LG20G009250	LG20
Schu_LG18G008830	LG18G008830	LG18
Schu_LG04G001460	LG04G001460	LG04
Schu_LG08G005230	LG08G005230	LG08
Schu_LG24G001350	LG24G001350	LG24
Schu_LG18G003670	LG18G003670	LG18
Schu_LG14G001030	LG14G001030	LG14
Schu_LG12G008490	LG12G008490	LG12
Schu_LG06G003280	LG06G003280	LG06
Schu_LG14G005390	LG14G005390	LG14
Schu_LG23G005420	LG23G005420	LG23
Schu_LG21G004920	LG21G004920	LG21
Schu_LG02G008180	LG02G008180	LG02
Schu_LG12G003000	LG12G003000	LG12
Schu_LG22G006040	LG22G006040	LG22
Schu_LG17G001000	LG17G001000	LG17
Schu_LG10G010090	LG10G010090	LG10
Schu_LG10G003180	LG10G003180	LG10
Schu_LG05G008640	LG05G008640	LG05
Schu_LG21G009640	LG21G009640	LG21
Schu_LG06G004930	LG06G004930	LG06
Schu_LG03G000420	LG03G000420	LG03
Schu_LG05G010660	LG05G010660	LG05
Schu_LG16G001310	LG16G001310	LG16
Schu_LG17G005590	LG17G005590	LG17
Schu_LG21G001890	LG21G001890	LG21
Schu_LG02G010010	LG02G010010	LG02
Schu_LG23G000260	LG23G000260	LG23
Schu_LG09G008070	LG09G008070	LG09
Schu_LG15G002540	LG15G002540	LG15
Schu_LG05G004490	LG05G004490	LG05
Schu_LG01G002910	LG01G002910	LG01
Schu_LG15G005110	LG15G005110	LG15
Schu_LG01G008330	LG01G008330	LG01
Schu_LG08G004430	LG08G004430	LG08
Schu_LG12G000280	LG12G000280	LG12
Schu_LG14G007980	LG14G007980	LG14
Schu_LG15G002940	LG15G002940	LG15
Schu_LG16G001930	LG16G001930	LG16
Schu_LG21G000960	LG21G000960	LG21
Schu_LG07G008340	LG07G008340	LG07
Schu_LG10G007930	LG10G007930	LG10
Schu_LG06G002630	LG06G002630	LG06
Schu_LG03G005570	LG03G005570	LG03
Schu_LG09G009310	LG09G009310	LG09
Schu_LG16G008010	LG16G008010	LG16
Schu_LG23G006380	LG23G006380	LG23
Schu_LG16G002530	LG16G002530	LG16
Schu_LG04G004770	LG04G004770	LG04
Schu_LG01G005970	LG01G005970	LG01
Schu_LG23G001680	LG23G001680	LG23
Schu_LG19G005520	LG19G005520	LG19
Schu_LG22G007720	LG22G007720	LG22
Schu_LG10G002660	LG10G002660	LG10
Schu_LG08G008540	LG08G008540	LG08
Schu_LG05G009070	LG05G009070	LG05
Schu_LG13G009300	LG13G009300	LG13
Schu_LG09G007450	LG09G007450	LG09
Schu_LG13G007420	LG13G007420	LG13
Schu_LG10G008100	LG10G008100	LG10
Schu_LG07G008530	LG07G008530	LG07
Schu_LG10G002570	LG10G002570	LG10
Schu_LG21G007720	LG21G007720	LG21
Schu_LG13G007290	LG13G007290	LG13
Schu_LG02G000710	LG02G000710	LG02
Schu_LG09G004550	LG09G004550	LG09
Schu_LG21G003290	LG21G003290	LG21
Schu_LG24G001790	LG24G001790	LG24
Schu_LG03G001790	LG03G001790	LG03
Schu_LG11G006250	LG11G006250	LG11
Schu_LG14G006890	LG14G006890	LG14
Schu_LG07G005360	LG07G005360	LG07
Schu_LG04G002850	LG04G002850	LG04
Schu_LG17G003320	LG17G003320	LG17
Schu_LG18G002580	LG18G002580	LG18
Schu_LG05G007120	LG05G007120	LG05
Schu_LG05G003040	LG05G003040	LG05
Schu_LG07G006540	LG07G006540	LG07
Schu_LG08G005180	LG08G005180	LG08
Schu_LG03G008570	LG03G008570	LG03
Schu_LG15G007250	LG15G007250	LG15
Schu_LG06G005310	LG06G005310	LG06
Schu_LG01G005990	LG01G005990	LG01
Schu_LG15G006580	LG15G006580	LG15
Schu_LG18G004610	LG18G004610	LG18
Schu_LG02G008470	LG02G008470	LG02
Schu_LG07G007000	LG07G007000	LG07
Schu_LG06G000350	LG06G000350	LG06
Schu_LG06G010240	LG06G010240	LG06
Schu_LG05G006940	LG05G006940	LG05
Schu_LG03G005330	LG03G005330	LG03
Schu_LG12G001830	LG12G001830	LG12
Schu_LG07G009120	LG07G009120	LG07
Schu_LG10G002540	LG10G002540	LG10
Schu_LG08G000110	LG08G000110	LG08
Schu_LG10G010020	LG10G010020	LG10
Schu_LG23G001520	LG23G001520	LG23
Schu_LG15G000990	LG15G000990	LG15
Schu_LG08G006060	LG08G006060	LG08
Schu_LG06G006540	LG06G006540	LG06
Schu_LG06G000190	LG06G000190	LG06
Schu_LG19G002280	LG19G002280	LG19
Schu_LG06G007710	LG06G007710	LG06
Schu_LG08G005640	LG08G005640	LG08
Schu_LG06G010380	LG06G010380	LG06
Schu_LG06G008450	LG06G008450	LG06
Schu_LG09G002620	LG09G002620	LG09
Schu_LG17G005250	LG17G005250	LG17
Schu_LG15G001210	LG15G001210	LG15
Schu_LG02G003810	LG02G003810	LG02
Schu_LG21G000540	LG21G000540	LG21
Schu_LG07G006650	LG07G006650	LG07
Schu_LG01G006210	LG01G006210	LG01
Schu_LG11G004060	LG11G004060	LG11
Schu_LG02G003130	LG02G003130	LG02
Schu_LG23G003700	LG23G003700	LG23
Schu_LG11G003680	LG11G003680	LG11
Schu_LG04G008720	LG04G008720	LG04
Schu_LG06G005850	LG06G005850	LG06
Schu_LG08G005120	LG08G005120	LG08
Schu_LG05G009650	LG05G009650	LG05
Schu_LG10G004080	LG10G004080	LG10
Schu_LG06G010130	LG06G010130	LG06
Schu_LG23G005820	LG23G005820	LG23
Schu_LG08G005580	LG08G005580	LG08
Schu_LG01G003770	LG01G003770	LG01
Schu_LG12G003420	LG12G003420	LG12
Schu_LG19G001530	LG19G001530	LG19
Schu_LG13G000180	LG13G000180	LG13
Schu_LG20G003970	LG20G003970	LG20
Schu_LG13G004780	LG13G004780	LG13
Schu_LG20G001470	LG20G001470	LG20
Schu_LG09G004220	LG09G004220	LG09
Schu_LG14G006440	LG14G006440	LG14
Schu_LG12G008620	LG12G008620	LG12
Schu_LG08G006120	LG08G006120	LG08
Schu_LG21G006590	LG21G006590	LG21
Schu_LG20G001630	LG20G001630	LG20
Schu_LG16G009130	LG16G009130	LG16
Schu_LG02G004050	LG02G004050	LG02
Schu_LG21G006090	LG21G006090	LG21
Schu_LG02G006190	LG02G006190	LG02
Schu_LG11G003290	LG11G003290	LG11
Schu_LG12G000600	LG12G000600	LG12
Schu_LG06G002910	LG06G002910	LG06
Schu_LG02G004040	LG02G004040	LG02
Schu_LG05G006190	LG05G006190	LG05
Schu_LG19G007220	LG19G007220	LG19
Schu_LG10G000200	LG10G000200	LG10
Schu_LG23G000320	LG23G000320	LG23
Schu_LG19G006090	LG19G006090	LG19
Schu_LG07G006110	LG07G006110	LG07
Schu_LG17G006390	LG17G006390	LG17
Schu_LG06G001930	LG06G001930	LG06
Schu_LG01G009520	LG01G009520	LG01
Schu_LG05G006180	LG05G006180	LG05
Schu_LG07G006350	LG07G006350	LG07
Schu_LG18G007500	LG18G007500	LG18
Schu_LG08G004280	LG08G004280	LG08
Schu_LG22G005960	LG22G005960	LG22
Schu_LG07G002160	LG07G002160	LG07
Schu_LG15G002490	LG15G002490	LG15
Schu_LG14G006180	LG14G006180	LG14
Schu_LG03G001940	LG03G001940	LG03
Schu_LG13G008580	LG13G008580	LG13
Schu_LG18G004950	LG18G004950	LG18
Schu_LG04G003530	LG04G003530	LG04
Schu_LG08G003240	LG08G003240	LG08
Schu_LG20G001140	LG20G001140	LG20
Schu_LG15G007390	LG15G007390	LG15
Schu_LG04G006880	LG04G006880	LG04
Schu_LG07G006950	LG07G006950	LG07
Schu_LG06G008820	LG06G008820	LG06
Schu_LG02G005500	LG02G005500	LG02
Schu_LG22G003690	LG22G003690	LG22
Schu_LG24G003620	LG24G003620	LG24
Schu_LG09G002350	LG09G002350	LG09
Schu_LG04G011430	LG04G011430	LG04
Schu_LG14G008400	LG14G008400	LG14
Schu_LG23G005610	LG23G005610	LG23
Schu_LG17G005290	LG17G005290	LG17
Schu_LG21G010690	LG21G010690	LG21
Schu_LG14G000180	LG14G000180	LG14
Schu_LG23G004410	LG23G004410	LG23
Schu_LG08G001400	LG08G001400	LG08
Schu_LG10G004440	LG10G004440	LG10
Schu_LG10G007430	LG10G007430	LG10
Schu_LG01G003270	LG01G003270	LG01
Schu_LG19G003240	LG19G003240	LG19
Schu_LG12G006000	LG12G006000	LG12
Schu_LG05G008900	LG05G008900	LG05
Schu_LG05G004560	LG05G004560	LG05
Schu_LG05G003290	LG05G003290	LG05
Schu_LG17G009010	LG17G009010	LG17
Schu_LG17G009340	LG17G009340	LG17
Schu_LG21G003070	LG21G003070	LG21
Schu_LG15G003230	LG15G003230	LG15
Schu_LG20G009170	LG20G009170	LG20
Schu_LG09G008090	LG09G008090	LG09
Schu_LG13G004710	LG13G004710	LG13
Schu_LG10G002930	LG10G002930	LG10
Schu_LG17G003730	LG17G003730	LG17
Schu_LG11G002310	LG11G002310	LG11
Schu_LG14G009280	LG14G009280	LG14
Schu_LG18G003840	LG18G003840	LG18
Schu_LG08G007060	LG08G007060	LG08
Schu_LG06G007700	LG06G007700	LG06
Schu_LG13G009880	LG13G009880	LG13
Schu_LG08G001520	LG08G001520	LG08
Schu_LG20G001760	LG20G001760	LG20
Schu_LG20G002770	LG20G002770	LG20
Schu_LG15G001380	LG15G001380	LG15
Schu_LG16G001780	LG16G001780	LG16
Schu_LG13G001370	LG13G001370	LG13
Schu_LG03G011510	LG03G011510	LG03
Schu_LG12G005360	LG12G005360	LG12
Schu_LG09G007060	LG09G007060	LG09
Schu_LG05G009330	LG05G009330	LG05
Schu_LG02G005680	LG02G005680	LG02
Schu_LG01G008440	LG01G008440	LG01
Schu_LG17G007080	LG17G007080	LG17
Schu_LG11G007990	LG11G007990	LG11
Schu_LG23G005920	LG23G005920	LG23
Schu_LG07G002510	LG07G002510	LG07
Schu_LG03G006660	LG03G006660	LG03
Schu_LG11G003030	LG11G003030	LG11
Schu_LG04G004480	LG04G004480	LG04
Schu_LG06G001390	LG06G001390	LG06
Schu_LG16G006220	LG16G006220	LG16
Schu_LG22G008000	LG22G008000	LG22
Schu_LG21G010530	LG21G010530	LG21
Schu_LG12G004170	LG12G004170	LG12
Schu_LG10G008850	LG10G008850	LG10
Schu_LG19G001900	LG19G001900	LG19
Schu_LG01G008900	LG01G008900	LG01
Schu_LG24G000980	LG24G000980	LG24
Schu_LG20G008680	LG20G008680	LG20
Schu_LG07G003820	LG07G003820	LG07
Schu_LG05G000480	LG05G000480	LG05
Schu_LG19G006570	LG19G006570	LG19
Schu_LG05G011050	LG05G011050	LG05
Schu_LG12G001070	LG12G001070	LG12
Schu_LG04G001200	LG04G001200	LG04
Schu_LG09G007090	LG09G007090	LG09
Schu_LG12G001300	LG12G001300	LG12
Schu_LG12G008190	LG12G008190	LG12
Schu_LG23G003200	LG23G003200	LG23
Schu_LG07G001870	LG07G001870	LG07
Schu_LG14G006550	LG14G006550	LG14
Schu_LG22G001840	LG22G001840	LG22
Schu_LG20G006240	LG20G006240	LG20
Schu_LG21G004050	LG21G004050	LG21
Schu_LG06G000530	LG06G000530	LG06
Schu_LG18G003650	LG18G003650	LG18
Schu_LG13G002100	LG13G002100	LG13
Schu_LG24G003190	LG24G003190	LG24
Schu_LG11G000190	LG11G000190	LG11
Schu_LG14G002010	LG14G002010	LG14
Schu_LG18G008980	LG18G008980	LG18
Schu_LG20G001050	LG20G001050	LG20
Schu_LG13G000620	LG13G000620	LG13
Schu_LG21G003180	LG21G003180	LG21
Schu_LG05G006380	LG05G006380	LG05
Schu_LG15G006870	LG15G006870	LG15
Schu_LG12G005430	LG12G005430	LG12
Schu_LG09G009680	LG09G009680	LG09
Schu_LG21G001980	LG21G001980	LG21
Schu_LG01G003480	LG01G003480	LG01
Schu_LG12G002740	LG12G002740	LG12
Schu_LG13G006880	LG13G006880	LG13
Schu_LG06G008730	LG06G008730	LG06
Schu_LG18G000330	LG18G000330	LG18
Schu_LG22G004540	LG22G004540	LG22
Schu_LG07G008050	LG07G008050	LG07
Schu_LG09G008360	LG09G008360	LG09
Schu_LG01G009270	LG01G009270	LG01
Schu_LG01G002160	LG01G002160	LG01
Schu_LG06G006010	LG06G006010	LG06
Schu_LG12G004460	LG12G004460	LG12
Schu_LG12G002090	LG12G002090	LG12
Schu_LG13G006010	LG13G006010	LG13
Schu_LG02G010530	LG02G010530	LG02
Schu_LG21G005600	LG21G005600	LG21
Schu_LG22G007840	LG22G007840	LG22
Schu_LG24G003080	LG24G003080	LG24
Schu_LG21G003400	LG21G003400	LG21
Schu_LG05G010610	LG05G010610	LG05
Schu_LG17G005130	LG17G005130	LG17
Schu_LG01G001140	LG01G001140	LG01
Schu_LG15G000970	LG15G000970	LG15
Schu_LG18G001730	LG18G001730	LG18
Schu_LG07G008200	LG07G008200	LG07
Schu_LG15G009060	LG15G009060	LG15
Schu_LG20G002210	LG20G002210	LG20
Schu_LG18G005940	LG18G005940	LG18
Schu_LG04G001590	LG04G001590	LG04
Schu_LG04G003690	LG04G003690	LG04
Schu_LG09G005340	LG09G005340	LG09
Schu_LG11G007930	LG11G007930	LG11
Schu_LG14G004750	LG14G004750	LG14
Schu_LG05G011720	LG05G011720	LG05
Schu_LG13G002700	LG13G002700	LG13
Schu_LG04G001570	LG04G001570	LG04
Schu_LG05G008670	LG05G008670	LG05
Schu_LG06G009260	LG06G009260	LG06
Schu_LG21G007490	LG21G007490	LG21
Schu_LG23G002340	LG23G002340	LG23
Schu_LG11G006920	LG11G006920	LG11
Schu_LG06G003850	LG06G003850	LG06
Schu_LG06G000510	LG06G000510	LG06
Schu_LG09G002570	LG09G002570	LG09
Schu_LG02G001320	LG02G001320	LG02
Schu_LG23G003570	LG23G003570	LG23
Schu_LG02G006720	LG02G006720	LG02
Schu_LG18G003080	LG18G003080	LG18
Schu_LG20G006880	LG20G006880	LG20
Schu_LG15G002310	LG15G002310	LG15
Schu_LG13G006960	LG13G006960	LG13
Schu_LG22G005100	LG22G005100	LG22
Schu_LG24G002650	LG24G002650	LG24
Schu_LG08G003440	LG08G003440	LG08
Schu_LG02G010420	LG02G010420	LG02
Schu_LG03G011650	LG03G011650	LG03
Schu_LG01G007000	LG01G007000	LG01
Schu_LG09G008970	LG09G008970	LG09
Schu_LG08G003230	LG08G003230	LG08
Schu_LG13G008400	LG13G008400	LG13
Schu_LG22G000520	LG22G000520	LG22
Schu_LG22G007010	LG22G007010	LG22
Schu_LG05G000010	LG05G000010	LG05
Schu_LG13G001610	LG13G001610	LG13
Schu_LG09G009060	LG09G009060	LG09
Schu_LG17G005870	LG17G005870	LG17
Schu_LG21G008700	LG21G008700	LG21
Schu_LG23G004210	LG23G004210	LG23
Schu_LG09G004040	LG09G004040	LG09
Schu_LG08G009250	LG08G009250	LG08
Schu_LG14G005860	LG14G005860	LG14
Schu_LG20G005710	LG20G005710	LG20
Schu_LG16G006970	LG16G006970	LG16
Schu_LG15G001120	LG15G001120	LG15
Schu_LG07G000490	LG07G000490	LG07
Schu_LG02G010850	LG02G010850	LG02
Schu_LG19G004960	LG19G004960	LG19
Schu_LG18G005850	LG18G005850	LG18
Schu_LG15G009210	LG15G009210	LG15
Schu_LG13G000770	LG13G000770	LG13
Schu_LG21G008160	LG21G008160	LG21
Schu_LG15G004430	LG15G004430	LG15
Schu_LG01G007190	LG01G007190	LG01
Schu_LG06G004470	LG06G004470	LG06
Schu_LG08G001650	LG08G001650	LG08
Schu_LG03G001760	LG03G001760	LG03
Schu_LG24G001300	LG24G001300	LG24
Schu_LG16G004880	LG16G004880	LG16
Schu_LG15G008730	LG15G008730	LG15
Schu_LG18G003050	LG18G003050	LG18
Schu_LG03G008150	LG03G008150	LG03
Schu_LG08G007730	LG08G007730	LG08
Schu_LG06G003390	LG06G003390	LG06
Schu_LG04G000820	LG04G000820	LG04
Schu_LG19G005450	LG19G005450	LG19
Schu_LG09G004940	LG09G004940	LG09
Schu_LG22G007970	LG22G007970	LG22
Schu_LG06G003230	LG06G003230	LG06
Schu_LG10G001750	LG10G001750	LG10
Schu_LG22G001670	LG22G001670	LG22
Schu_LG10G008280	LG10G008280	LG10
Schu_LG14G009520	LG14G009520	LG14
Schu_LG22G004880	LG22G004880	LG22
Schu_LG20G001810	LG20G001810	LG20
Schu_LG01G008530	LG01G008530	LG01
Schu_LG01G005580	LG01G005580	LG01
Schu_LG14G009470	LG14G009470	LG14
Schu_LG12G008680	LG12G008680	LG12
Schu_LG11G005040	LG11G005040	LG11
Schu_LG06G005720	LG06G005720	LG06
Schu_Contig00105G000060	Contig00105G000060	Contig00105G000060
Schu_LG14G005400	LG14G005400	LG14
Schu_LG06G002320	LG06G002320	LG06
Schu_LG16G003380	LG16G003380	LG16
Schu_LG05G006300	LG05G006300	LG05
Schu_LG21G004700	LG21G004700	LG21
Schu_LG08G002640	LG08G002640	LG08
Schu_LG07G004290	LG07G004290	LG07
Schu_LG05G004990	LG05G004990	LG05
Schu_LG05G000910	LG05G000910	LG05
Schu_LG13G010340	LG13G010340	LG13
Schu_LG04G002810	LG04G002810	LG04
Schu_LG17G002740	LG17G002740	LG17
Schu_LG16G001400	LG16G001400	LG16
Schu_LG04G006840	LG04G006840	LG04
Schu_LG10G008440	LG10G008440	LG10
Schu_LG03G007500	LG03G007500	LG03
Schu_LG21G009970	LG21G009970	LG21
Schu_LG24G004760	LG24G004760	LG24
Schu_LG17G006600	LG17G006600	LG17
Schu_LG14G007070	LG14G007070	LG14
Schu_LG08G001820	LG08G001820	LG08
Schu_LG01G004570	LG01G004570	LG01
Schu_LG11G005590	LG11G005590	LG11
Schu_LG05G011420	LG05G011420	LG05
Schu_LG16G001480	LG16G001480	LG16
Schu_LG10G011730	LG10G011730	LG10
Schu_LG15G006130	LG15G006130	LG15
Schu_LG07G008510	LG07G008510	LG07
Schu_LG05G009390	LG05G009390	LG05
Schu_LG13G001330	LG13G001330	LG13
Schu_LG24G000300	LG24G000300	LG24
Schu_LG05G005390	LG05G005390	LG05
Schu_LG24G001670	LG24G001670	LG24
Schu_LG21G000450	LG21G000450	LG21
Schu_LG04G006000	LG04G006000	LG04
Schu_LG05G008350	LG05G008350	LG05
Schu_LG10G011410	LG10G011410	LG10
Schu_LG06G001270	LG06G001270	LG06
Schu_LG14G000700	LG14G000700	LG14
Schu_LG14G000740	LG14G000740	LG14
Schu_LG03G006150	LG03G006150	LG03
Schu_LG23G005570	LG23G005570	LG23
Schu_LG07G000060	LG07G000060	LG07
Schu_LG10G007860	LG10G007860	LG10
Schu_LG16G004900	LG16G004900	LG16
Schu_LG20G002610	LG20G002610	LG20
Schu_LG18G003440	LG18G003440	LG18
Schu_LG23G002650	LG23G002650	LG23
Schu_LG13G011320	LG13G011320	LG13
Schu_LG09G003140	LG09G003140	LG09
Schu_LG19G001560	LG19G001560	LG19
Schu_LG14G003810	LG14G003810	LG14
Schu_LG14G001670	LG14G001670	LG14
Schu_LG10G003840	LG10G003840	LG10
Schu_LG02G003200	LG02G003200	LG02
Schu_LG16G004150	LG16G004150	LG16
Schu_LG20G003620	LG20G003620	LG20
Schu_LG23G000390	LG23G000390	LG23
Schu_LG22G005840	LG22G005840	LG22
Schu_LG15G002580	LG15G002580	LG15
Schu_LG19G007390	LG19G007390	LG19
Schu_LG12G001390	LG12G001390	LG12
Schu_LG09G000840	LG09G000840	LG09
Schu_LG11G008250	LG11G008250	LG11
Schu_LG16G008630	LG16G008630	LG16
Schu_LG07G003170	LG07G003170	LG07
Schu_LG14G006320	LG14G006320	LG14
Schu_LG14G001310	LG14G001310	LG14
Schu_LG03G000980	LG03G000980	LG03
Schu_LG12G001330	LG12G001330	LG12
Schu_LG17G008460	LG17G008460	LG17
Schu_LG11G006890	LG11G006890	LG11
Schu_LG06G002760	LG06G002760	LG06
Schu_LG22G007040	LG22G007040	LG22
Schu_LG04G008500	LG04G008500	LG04
Schu_LG02G011450	LG02G011450	LG02
Schu_LG02G006090	LG02G006090	LG02
Schu_LG04G009060	LG04G009060	LG04
Schu_LG18G001360	LG18G001360	LG18
Schu_LG17G004440	LG17G004440	LG17
Schu_LG01G005570	LG01G005570	LG01
Schu_LG02G010290	LG02G010290	LG02
Schu_LG19G004540	LG19G004540	LG19
Schu_LG15G008580	LG15G008580	LG15
Schu_LG16G003960	LG16G003960	LG16
Schu_LG10G005720	LG10G005720	LG10
Schu_LG09G003800	LG09G003800	LG09
Schu_LG11G000920	LG11G000920	LG11
Schu_LG24G001690	LG24G001690	LG24
Schu_LG10G009830	LG10G009830	LG10
Schu_LG10G002240	LG10G002240	LG10
Schu_LG14G000870	LG14G000870	LG14
Schu_LG07G006030	LG07G006030	LG07
Schu_LG12G005190	LG12G005190	LG12
Schu_LG17G004770	LG17G004770	LG17
Schu_LG16G000220	LG16G000220	LG16
Schu_LG11G004990	LG11G004990	LG11
Schu_LG11G001030	LG11G001030	LG11
Schu_LG04G008760	LG04G008760	LG04
Schu_LG09G004790	LG09G004790	LG09
Schu_LG12G007930	LG12G007930	LG12
Schu_LG18G006240	LG18G006240	LG18
Schu_LG11G005560	LG11G005560	LG11
Schu_LG03G005070	LG03G005070	LG03
Schu_LG18G003990	LG18G003990	LG18
Schu_LG21G002260	LG21G002260	LG21
Schu_LG19G002910	LG19G002910	LG19
Schu_LG04G008370	LG04G008370	LG04
Schu_LG19G004260	LG19G004260	LG19
Schu_LG06G000550	LG06G000550	LG06
Schu_LG06G001080	LG06G001080	LG06
Schu_LG05G006690	LG05G006690	LG05
Schu_LG21G010670	LG21G010670	LG21
Schu_LG14G001910	LG14G001910	LG14
Schu_LG15G000290	LG15G000290	LG15
Schu_LG17G004210	LG17G004210	LG17
Schu_LG05G002410	LG05G002410	LG05
Schu_LG02G001910	LG02G001910	LG02
Schu_LG20G007810	LG20G007810	LG20
Schu_LG22G001740	LG22G001740	LG22
Schu_LG24G000370	LG24G000370	LG24
Schu_LG11G004940	LG11G004940	LG11
Schu_LG21G004380	LG21G004380	LG21
Schu_LG15G002770	LG15G002770	LG15
Schu_LG06G010250	LG06G010250	LG06
Schu_LG19G003410	LG19G003410	LG19
Schu_LG09G011240	LG09G011240	LG09
Schu_LG10G006190	LG10G006190	LG10
Schu_LG02G002510	LG02G002510	LG02
Schu_LG15G008250	LG15G008250	LG15
Schu_LG06G007650	LG06G007650	LG06
Schu_LG03G006670	LG03G006670	LG03
Schu_LG06G002970	LG06G002970	LG06
Schu_LG05G001270	LG05G001270	LG05
Schu_LG05G004750	LG05G004750	LG05
Schu_LG02G008200	LG02G008200	LG02
Schu_LG19G005880	LG19G005880	LG19
Schu_LG21G000600	LG21G000600	LG21
Schu_LG21G002050	LG21G002050	LG21
Schu_LG09G006390	LG09G006390	LG09
Schu_LG11G007020	LG11G007020	LG11
Schu_LG13G006350	LG13G006350	LG13
Schu_LG06G009760	LG06G009760	LG06
Schu_LG06G004730	LG06G004730	LG06
Schu_LG06G005530	LG06G005530	LG06
Schu_LG11G005510	LG11G005510	LG11
Schu_LG06G008910	LG06G008910	LG06
Schu_LG21G005590	LG21G005590	LG21
Schu_LG04G007290	LG04G007290	LG04
Schu_LG12G006920	LG12G006920	LG12
Schu_LG11G000460	LG11G000460	LG11
Schu_LG08G002150	LG08G002150	LG08
Schu_LG10G010540	LG10G010540	LG10
Schu_LG19G001480	LG19G001480	LG19
Schu_LG14G008230	LG14G008230	LG14
Schu_LG06G005510	LG06G005510	LG06
Schu_LG19G003960	LG19G003960	LG19
Schu_LG09G001400	LG09G001400	LG09
Schu_LG20G006470	LG20G006470	LG20
Schu_LG22G008290	LG22G008290	LG22
Schu_LG06G003330	LG06G003330	LG06
Schu_LG05G000330	LG05G000330	LG05
Schu_LG09G000830	LG09G000830	LG09
Schu_LG09G003510	LG09G003510	LG09
Schu_LG13G005760	LG13G005760	LG13
Schu_LG04G007640	LG04G007640	LG04
Schu_LG14G005060	LG14G005060	LG14
Schu_LG22G003280	LG22G003280	LG22
Schu_LG10G009120	LG10G009120	LG10
Schu_LG23G002850	LG23G002850	LG23
Schu_LG16G006690	LG16G006690	LG16
Schu_LG09G004210	LG09G004210	LG09
Schu_LG02G006100	LG02G006100	LG02
Schu_LG03G008760	LG03G008760	LG03
Schu_LG24G003280	LG24G003280	LG24
Schu_LG23G003850	LG23G003850	LG23
Schu_LG13G005600	LG13G005600	LG13
Schu_LG13G005310	LG13G005310	LG13
Schu_LG05G001470	LG05G001470	LG05
Schu_LG08G006900	LG08G006900	LG08
Schu_LG11G004720	LG11G004720	LG11
Schu_LG04G005120	LG04G005120	LG04
Schu_LG13G002250	LG13G002250	LG13
Schu_LG21G003760	LG21G003760	LG21
Schu_LG02G001930	LG02G001930	LG02
Schu_LG05G002930	LG05G002930	LG05
Schu_LG23G003300	LG23G003300	LG23
Schu_LG15G004420	LG15G004420	LG15
Schu_LG03G012610	LG03G012610	LG03
Schu_LG03G006280	LG03G006280	LG03
Schu_LG21G006680	LG21G006680	LG21
Schu_LG22G006150	LG22G006150	LG22
Schu_LG12G004330	LG12G004330	LG12
Schu_LG22G004490	LG22G004490	LG22
Schu_LG11G002280	LG11G002280	LG11
Schu_LG18G008820	LG18G008820	LG18
Schu_LG24G002360	LG24G002360	LG24
Schu_LG18G002190	LG18G002190	LG18
Schu_LG22G000790	LG22G000790	LG22
Schu_LG06G001300	LG06G001300	LG06
Schu_LG03G005240	LG03G005240	LG03
Schu_LG13G008810	LG13G008810	LG13
Schu_LG11G003900	LG11G003900	LG11
Schu_LG13G001960	LG13G001960	LG13
Schu_LG07G008470	LG07G008470	LG07
Schu_LG06G000980	LG06G000980	LG06
Schu_LG22G005330	LG22G005330	LG22
Schu_LG22G005780	LG22G005780	LG22
Schu_LG03G000520	LG03G000520	LG03
Schu_LG02G010550	LG02G010550	LG02
Schu_LG10G008470	LG10G008470	LG10
Schu_LG20G003940	LG20G003940	LG20
Schu_LG21G001900	LG21G001900	LG21
Schu_LG08G004690	LG08G004690	LG08
Schu_LG06G004500	LG06G004500	LG06
Schu_LG13G005680	LG13G005680	LG13
Schu_LG14G003880	LG14G003880	LG14
Schu_LG02G001080	LG02G001080	LG02
Schu_LG21G001000	LG21G001000	LG21
Schu_LG23G003950	LG23G003950	LG23
Schu_LG19G004110	LG19G004110	LG19
Schu_LG17G005340	LG17G005340	LG17
Schu_LG08G000320	LG08G000320	LG08
Schu_LG22G002440	LG22G002440	LG22
Schu_LG01G004070	LG01G004070	LG01
Schu_LG21G003020	LG21G003020	LG21
Schu_LG16G002440	LG16G002440	LG16
Schu_LG03G002020	LG03G002020	LG03
Schu_LG12G008500	LG12G008500	LG12
Schu_LG17G001320	LG17G001320	LG17
Schu_LG15G000580	LG15G000580	LG15
Schu_LG09G010690	LG09G010690	LG09
Schu_LG21G010930	LG21G010930	LG21
Schu_LG21G008580	LG21G008580	LG21
Schu_LG14G003390	LG14G003390	LG14
Schu_LG06G001640	LG06G001640	LG06
Schu_LG17G006310	LG17G006310	LG17
Schu_LG01G008310	LG01G008310	LG01
Schu_LG22G000750	LG22G000750	LG22
Schu_LG22G005900	LG22G005900	LG22
Schu_LG20G007510	LG20G007510	LG20
Schu_LG02G002160	LG02G002160	LG02
Schu_LG21G000580	LG21G000580	LG21
Schu_LG01G009600	LG01G009600	LG01
Schu_LG15G008940	LG15G008940	LG15
Schu_LG11G006740	LG11G006740	LG11
Schu_LG02G011060	LG02G011060	LG02
Schu_LG16G001140	LG16G001140	LG16
Schu_LG09G001820	LG09G001820	LG09
Schu_LG08G007890	LG08G007890	LG08
Schu_LG12G003320	LG12G003320	LG12
Schu_LG17G008370	LG17G008370	LG17
Schu_LG17G009680	LG17G009680	LG17
Schu_LG24G004500	LG24G004500	LG24
Schu_LG14G004790	LG14G004790	LG14
Schu_LG06G009690	LG06G009690	LG06
Schu_LG06G009190	LG06G009190	LG06
Schu_LG19G007010	LG19G007010	LG19
Schu_LG15G006750	LG15G006750	LG15
Schu_LG19G006040	LG19G006040	LG19
Schu_LG21G010250	LG21G010250	LG21
Schu_LG02G004170	LG02G004170	LG02
Schu_LG09G001310	LG09G001310	LG09
Schu_LG06G000020	LG06G000020	LG06
Schu_LG09G000200	LG09G000200	LG09
Schu_LG07G002520	LG07G002520	LG07
Schu_LG03G011820	LG03G011820	LG03
Schu_LG11G007760	LG11G007760	LG11
Schu_LG19G005100	LG19G005100	LG19
Schu_LG18G002750	LG18G002750	LG18
Schu_LG09G002690	LG09G002690	LG09
Schu_LG20G003730	LG20G003730	LG20
Schu_LG03G002390	LG03G002390	LG03
Schu_LG03G011100	LG03G011100	LG03
Schu_LG20G000690	LG20G000690	LG20
Schu_LG10G008080	LG10G008080	LG10
Schu_LG16G000530	LG16G000530	LG16
Schu_LG01G000260	LG01G000260	LG01
Schu_LG18G006160	LG18G006160	LG18
Schu_LG17G006720	LG17G006720	LG17
Schu_LG22G005930	LG22G005930	LG22
Schu_LG24G004480	LG24G004480	LG24
Schu_LG10G011710	LG10G011710	LG10
Schu_LG21G002430	LG21G002430	LG21
Schu_LG18G007160	LG18G007160	LG18
Schu_LG22G003480	LG22G003480	LG22
Schu_LG14G010230	LG14G010230	LG14
Schu_LG11G008580	LG11G008580	LG11
Schu_LG05G011630	LG05G011630	LG05
Schu_LG09G005990	LG09G005990	LG09
Schu_LG21G005810	LG21G005810	LG21
Schu_LG16G002950	LG16G002950	LG16
Schu_LG15G008960	LG15G008960	LG15
Schu_LG08G001290	LG08G001290	LG08
Schu_LG12G009500	LG12G009500	LG12
Schu_LG18G008630	LG18G008630	LG18
Schu_LG16G007270	LG16G007270	LG16
Schu_LG13G003810	LG13G003810	LG13
Schu_LG09G003470	LG09G003470	LG09
Schu_LG03G004520	LG03G004520	LG03
Schu_LG03G000670	LG03G000670	LG03
Schu_LG03G001620	LG03G001620	LG03
Schu_LG06G007110	LG06G007110	LG06
Schu_LG04G007740	LG04G007740	LG04
Schu_LG22G003630	LG22G003630	LG22
Schu_LG24G003990	LG24G003990	LG24
Schu_LG07G003050	LG07G003050	LG07
Schu_LG24G005830	LG24G005830	LG24
Schu_LG07G002070	LG07G002070	LG07
Schu_LG14G007060	LG14G007060	LG14
Schu_LG18G003470	LG18G003470	LG18
Schu_LG16G001680	LG16G001680	LG16
Schu_LG14G008620	LG14G008620	LG14
Schu_LG02G001790	LG02G001790	LG02
Schu_LG17G000280	LG17G000280	LG17
Schu_LG11G004690	LG11G004690	LG11
Schu_LG12G000010	LG12G000010	LG12
Schu_LG18G004500	LG18G004500	LG18
Schu_LG16G001010	LG16G001010	LG16
Schu_LG01G008830	LG01G008830	LG01
Schu_LG10G005180	LG10G005180	LG10
Schu_LG03G012630	LG03G012630	LG03
Schu_LG08G008950	LG08G008950	LG08
Schu_LG07G007970	LG07G007970	LG07
Schu_LG17G007380	LG17G007380	LG17
Schu_LG07G003400	LG07G003400	LG07
Schu_LG16G005340	LG16G005340	LG16
Schu_LG01G002720	LG01G002720	LG01
Schu_LG06G003380	LG06G003380	LG06
Schu_LG16G004200	LG16G004200	LG16
Schu_LG23G002050	LG23G002050	LG23
Schu_LG02G008190	LG02G008190	LG02
Schu_LG14G010150	LG14G010150	LG14
Schu_LG08G001040	LG08G001040	LG08
Schu_LG03G006950	LG03G006950	LG03
Schu_LG05G000600	LG05G000600	LG05
Schu_LG23G006220	LG23G006220	LG23
Schu_LG10G008580	LG10G008580	LG10
Schu_LG14G005960	LG14G005960	LG14
Schu_LG17G008270	LG17G008270	LG17
Schu_LG04G008620	LG04G008620	LG04
Schu_LG09G005590	LG09G005590	LG09
Schu_LG14G004490	LG14G004490	LG14
Schu_LG04G005840	LG04G005840	LG04
Schu_LG20G003420	LG20G003420	LG20
Schu_LG17G007260	LG17G007260	LG17
Schu_LG06G002780	LG06G002780	LG06
Schu_LG04G000630	LG04G000630	LG04
Schu_LG19G006660	LG19G006660	LG19
Schu_LG04G001510	LG04G001510	LG04
Schu_LG04G000100	LG04G000100	LG04
Schu_LG18G001020	LG18G001020	LG18
Schu_LG03G001520	LG03G001520	LG03
Schu_LG02G007470	LG02G007470	LG02
Schu_LG17G007030	LG17G007030	LG17
Schu_LG04G000430	LG04G000430	LG04
Schu_LG12G003040	LG12G003040	LG12
Schu_LG08G001550	LG08G001550	LG08
Schu_LG13G007960	LG13G007960	LG13
Schu_LG10G001450	LG10G001450	LG10
Schu_LG02G002120	LG02G002120	LG02
Schu_LG17G000990	LG17G000990	LG17
Schu_LG13G005860	LG13G005860	LG13
Schu_LG02G000860	LG02G000860	LG02
Schu_LG09G002400	LG09G002400	LG09
Schu_LG03G001700	LG03G001700	LG03
Schu_LG02G011130	LG02G011130	LG02
Schu_LG12G000900	LG12G000900	LG12
Schu_LG05G007620	LG05G007620	LG05
Schu_LG21G006800	LG21G006800	LG21
Schu_LG02G009530	LG02G009530	LG02
Schu_LG11G007170	LG11G007170	LG11
Schu_LG17G006920	LG17G006920	LG17
Schu_LG21G003940	LG21G003940	LG21
Schu_LG16G003010	LG16G003010	LG16
Schu_LG07G007230	LG07G007230	LG07
Schu_LG04G008490	LG04G008490	LG04
Schu_LG07G007920	LG07G007920	LG07
Schu_LG05G006520	LG05G006520	LG05
Schu_LG13G009980	LG13G009980	LG13
Schu_LG08G002060	LG08G002060	LG08
Schu_LG09G001150	LG09G001150	LG09
Schu_LG02G005380	LG02G005380	LG02
Schu_LG01G007750	LG01G007750	LG01
Schu_LG12G008470	LG12G008470	LG12
Schu_LG09G007440	LG09G007440	LG09
Schu_LG18G007560	LG18G007560	LG18
Schu_LG07G009760	LG07G009760	LG07
Schu_LG13G000610	LG13G000610	LG13
Schu_LG16G001500	LG16G001500	LG16
Schu_LG15G004760	LG15G004760	LG15
Schu_LG08G001630	LG08G001630	LG08
Schu_LG12G006050	LG12G006050	LG12
Schu_LG13G011170	LG13G011170	LG13
Schu_LG08G005670	LG08G005670	LG08
Schu_LG11G007480	LG11G007480	LG11
Schu_LG07G001120	LG07G001120	LG07
Schu_LG12G000960	LG12G000960	LG12
Schu_LG04G010730	LG04G010730	LG04
Schu_LG03G010270	LG03G010270	LG03
Schu_LG16G001960	LG16G001960	LG16
Schu_LG07G009740	LG07G009740	LG07
Schu_LG17G000290	LG17G000290	LG17
Schu_LG01G009500	LG01G009500	LG01
Schu_LG23G001020	LG23G001020	LG23
Schu_LG06G007800	LG06G007800	LG06
Schu_LG09G004950	LG09G004950	LG09
Schu_LG18G004480	LG18G004480	LG18
Schu_LG07G002880	LG07G002880	LG07
Schu_LG13G009540	LG13G009540	LG13
Schu_LG20G001570	LG20G001570	LG20
Schu_LG02G002340	LG02G002340	LG02
Schu_LG13G003190	LG13G003190	LG13
Schu_LG13G004080	LG13G004080	LG13
Schu_LG24G000990	LG24G000990	LG24
Schu_LG12G007320	LG12G007320	LG12
Schu_LG08G009390	LG08G009390	LG08
Schu_LG13G008540	LG13G008540	LG13
Schu_LG19G003550	LG19G003550	LG19
Schu_LG24G005190	LG24G005190	LG24
Schu_LG12G008570	LG12G008570	LG12
Schu_LG05G006830	LG05G006830	LG05
Schu_LG16G005090	LG16G005090	LG16
Schu_LG06G005560	LG06G005560	LG06
Schu_LG03G006390	LG03G006390	LG03
Schu_LG21G008870	LG21G008870	LG21
Schu_LG13G008840	LG13G008840	LG13
Schu_LG05G000810	LG05G000810	LG05
Schu_LG06G008370	LG06G008370	LG06
Schu_LG05G003460	LG05G003460	LG05
Schu_LG22G000380	LG22G000380	LG22
Schu_LG05G011170	LG05G011170	LG05
Schu_LG23G005450	LG23G005450	LG23
Schu_LG06G010290	LG06G010290	LG06
Schu_LG08G000290	LG08G000290	LG08
Schu_LG16G000890	LG16G000890	LG16
Schu_LG05G001390	LG05G001390	LG05
Schu_LG04G001290	LG04G001290	LG04
Schu_LG19G005800	LG19G005800	LG19
Schu_LG03G002490	LG03G002490	LG03
Schu_LG19G007270	LG19G007270	LG19
Schu_LG12G003210	LG12G003210	LG12
Schu_LG04G007000	LG04G007000	LG04
Schu_LG16G002980	LG16G002980	LG16
Schu_LG12G006840	LG12G006840	LG12
Schu_LG10G007750	LG10G007750	LG10
Schu_LG22G006560	LG22G006560	LG22
Schu_LG14G001950	LG14G001950	LG14
Schu_LG13G009720	LG13G009720	LG13
Schu_LG05G009850	LG05G009850	LG05
Schu_LG24G004900	LG24G004900	LG24
Schu_LG07G007050	LG07G007050	LG07
Schu_LG03G006440	LG03G006440	LG03
Schu_LG21G005680	LG21G005680	LG21
Schu_LG14G006670	LG14G006670	LG14
Schu_LG24G003440	LG24G003440	LG24
Schu_LG04G010670	LG04G010670	LG04
Schu_LG07G002140	LG07G002140	LG07
Schu_LG08G000200	LG08G000200	LG08
Schu_LG14G007880	LG14G007880	LG14
Schu_LG23G003400	LG23G003400	LG23
Schu_LG17G005860	LG17G005860	LG17
Schu_LG09G008690	LG09G008690	LG09
Schu_LG21G005320	LG21G005320	LG21
Schu_LG10G008910	LG10G008910	LG10
Schu_LG14G004660	LG14G004660	LG14
Schu_LG19G003300	LG19G003300	LG19
Schu_LG16G001330	LG16G001330	LG16
Schu_LG07G008890	LG07G008890	LG07
Schu_LG09G010380	LG09G010380	LG09
Schu_LG12G006660	LG12G006660	LG12
Schu_LG02G007140	LG02G007140	LG02
Schu_LG17G001710	LG17G001710	LG17
Schu_LG01G002110	LG01G002110	LG01
Schu_LG01G007300	LG01G007300	LG01
Schu_LG16G003250	LG16G003250	LG16
Schu_LG21G008830	LG21G008830	LG21
Schu_LG08G007000	LG08G007000	LG08
Schu_LG03G002040	LG03G002040	LG03
Schu_LG20G000530	LG20G000530	LG20
Schu_LG05G003400	LG05G003400	LG05
Schu_LG18G003560	LG18G003560	LG18
Schu_LG18G008220	LG18G008220	LG18
Schu_LG10G003810	LG10G003810	LG10
Schu_LG02G010600	LG02G010600	LG02
Schu_LG03G007840	LG03G007840	LG03
Schu_LG14G003630	LG14G003630	LG14
Schu_LG12G000060	LG12G000060	LG12
Schu_LG22G008160	LG22G008160	LG22
Schu_LG24G002290	LG24G002290	LG24
Schu_LG07G000780	LG07G000780	LG07
Schu_LG01G000110	LG01G000110	LG01
Schu_LG22G008310	LG22G008310	LG22
Schu_LG05G005750	LG05G005750	LG05
Schu_LG23G001210	LG23G001210	LG23
Schu_LG23G000110	LG23G000110	LG23
Schu_LG18G000430	LG18G000430	LG18
Schu_LG22G008070	LG22G008070	LG22
Schu_LG02G003170	LG02G003170	LG02
Schu_LG03G001110	LG03G001110	LG03
Schu_LG08G007610	LG08G007610	LG08
Schu_LG04G003910	LG04G003910	LG04
Schu_LG14G009700	LG14G009700	LG14
Schu_LG24G005060	LG24G005060	LG24
Schu_LG03G009830	LG03G009830	LG03
Schu_LG10G004730	LG10G004730	LG10
Schu_LG23G003120	LG23G003120	LG23
Schu_LG17G002450	LG17G002450	LG17
Schu_LG14G009780	LG14G009780	LG14
Schu_LG07G008830	LG07G008830	LG07
Schu_LG02G012230	LG02G012230	LG02
Schu_LG20G001710	LG20G001710	LG20
Schu_LG10G005250	LG10G005250	LG10
Schu_LG09G003640	LG09G003640	LG09
Schu_LG24G005500	LG24G005500	LG24
Schu_LG22G007470	LG22G007470	LG22
Schu_LG22G000880	LG22G000880	LG22
Schu_LG14G001080	LG14G001080	LG14
Schu_LG05G008910	LG05G008910	LG05
Schu_LG01G006180	LG01G006180	LG01
Schu_LG12G001780	LG12G001780	LG12
Schu_LG01G005080	LG01G005080	LG01
Schu_LG18G007640	LG18G007640	LG18
Schu_LG12G006890	LG12G006890	LG12
Schu_LG09G008250	LG09G008250	LG09
Schu_LG01G006940	LG01G006940	LG01
Schu_LG13G004410	LG13G004410	LG13
Schu_LG05G011590	LG05G011590	LG05
Schu_LG13G004420	LG13G004420	LG13
Schu_LG21G001870	LG21G001870	LG21
Schu_LG20G005140	LG20G005140	LG20
Schu_LG23G000520	LG23G000520	LG23
Schu_LG04G010690	LG04G010690	LG04
Schu_LG14G001900	LG14G001900	LG14
Schu_LG22G003220	LG22G003220	LG22
Schu_LG02G000810	LG02G000810	LG02
Schu_LG06G004700	LG06G004700	LG06
Schu_LG02G008120	LG02G008120	LG02
Schu_LG10G006120	LG10G006120	LG10
Schu_LG17G002910	LG17G002910	LG17
Schu_LG21G008760	LG21G008760	LG21
Schu_LG13G007370	LG13G007370	LG13
Schu_LG04G009990	LG04G009990	LG04
Schu_LG14G002220	LG14G002220	LG14
Schu_LG07G003880	LG07G003880	LG07
Schu_LG08G009220	LG08G009220	LG08
Schu_LG07G006490	LG07G006490	LG07
Schu_LG18G003290	LG18G003290	LG18
Schu_LG23G000030	LG23G000030	LG23
Schu_LG01G009720	LG01G009720	LG01
Schu_LG03G000790	LG03G000790	LG03
Schu_LG08G008040	LG08G008040	LG08
Schu_LG20G006340	LG20G006340	LG20
Schu_LG10G009970	LG10G009970	LG10
Schu_LG03G000940	LG03G000940	LG03
Schu_LG12G009150	LG12G009150	LG12
Schu_LG01G002470	LG01G002470	LG01
Schu_LG06G000160	LG06G000160	LG06
Schu_LG03G009590	LG03G009590	LG03
Schu_LG01G001460	LG01G001460	LG01
Schu_LG15G001310	LG15G001310	LG15
Schu_LG03G012290	LG03G012290	LG03
Schu_LG12G002080	LG12G002080	LG12
Schu_LG09G010270	LG09G010270	LG09
Schu_LG04G000070	LG04G000070	LG04
Schu_LG08G000450	LG08G000450	LG08
Schu_LG15G006650	LG15G006650	LG15
Schu_LG15G006310	LG15G006310	LG15
Schu_LG09G005460	LG09G005460	LG09
Schu_LG08G004010	LG08G004010	LG08
Schu_LG20G008270	LG20G008270	LG20
Schu_LG05G008870	LG05G008870	LG05
Schu_LG07G010330	LG07G010330	LG07
Schu_LG20G001430	LG20G001430	LG20
Schu_LG12G006030	LG12G006030	LG12
Schu_LG05G008660	LG05G008660	LG05
Schu_LG24G001130	LG24G001130	LG24
Schu_LG13G010570	LG13G010570	LG13
Schu_LG10G002560	LG10G002560	LG10
Schu_LG05G003130	LG05G003130	LG05
Schu_LG16G005570	LG16G005570	LG16
Schu_LG03G001970	LG03G001970	LG03
Schu_LG08G000170	LG08G000170	LG08
Schu_LG03G000430	LG03G000430	LG03
Schu_LG05G003790	LG05G003790	LG05
Schu_LG07G000980	LG07G000980	LG07
Schu_LG06G000250	LG06G000250	LG06
Schu_LG10G009980	LG10G009980	LG10
Schu_LG20G001360	LG20G001360	LG20
Schu_LG04G002660	LG04G002660	LG04
Schu_LG15G007170	LG15G007170	LG15
Schu_LG07G007360	LG07G007360	LG07
Schu_LG14G007160	LG14G007160	LG14
Schu_LG10G000870	LG10G000870	LG10
Schu_LG09G008340	LG09G008340	LG09
Schu_LG12G004020	LG12G004020	LG12
Schu_LG01G006380	LG01G006380	LG01
Schu_LG23G000460	LG23G000460	LG23
Schu_LG21G001810	LG21G001810	LG21
Schu_LG06G007600	LG06G007600	LG06
Schu_LG10G007110	LG10G007110	LG10
Schu_LG20G008400	LG20G008400	LG20
Schu_LG16G008240	LG16G008240	LG16
Schu_LG03G001230	LG03G001230	LG03
Schu_LG04G007120	LG04G007120	LG04
Schu_LG18G007490	LG18G007490	LG18
Schu_LG03G009320	LG03G009320	LG03
Schu_LG24G000550	LG24G000550	LG24
Schu_LG17G000370	LG17G000370	LG17
Schu_LG14G001000	LG14G001000	LG14
Schu_LG24G002620	LG24G002620	LG24
Schu_LG21G009000	LG21G009000	LG21
Schu_LG14G002740	LG14G002740	LG14
Schu_LG15G008660	LG15G008660	LG15
Schu_LG21G007340	LG21G007340	LG21
Schu_LG19G004050	LG19G004050	LG19
Schu_LG16G002910	LG16G002910	LG16
Schu_LG10G006530	LG10G006530	LG10
Schu_LG03G004090	LG03G004090	LG03
Schu_LG17G004370	LG17G004370	LG17
Schu_LG10G007040	LG10G007040	LG10
Schu_LG11G007030	LG11G007030	LG11
Schu_LG06G008330	LG06G008330	LG06
Schu_LG13G008890	LG13G008890	LG13
Schu_LG21G000310	LG21G000310	LG21
Schu_LG04G007180	LG04G007180	LG04
Schu_LG09G004650	LG09G004650	LG09
Schu_LG21G008890	LG21G008890	LG21
Schu_LG16G004440	LG16G004440	LG16
Schu_LG02G006440	LG02G006440	LG02
Schu_LG21G010580	LG21G010580	LG21
Schu_LG01G000180	LG01G000180	LG01
Schu_LG14G000490	LG14G000490	LG14
Schu_LG07G005910	LG07G005910	LG07
Schu_LG14G000840	LG14G000840	LG14
Schu_LG19G001090	LG19G001090	LG19
Schu_LG08G001600	LG08G001600	LG08
Schu_LG04G003490	LG04G003490	LG04
Schu_LG24G002630	LG24G002630	LG24
Schu_LG13G003880	LG13G003880	LG13
Schu_LG05G006510	LG05G006510	LG05
Schu_LG23G005400	LG23G005400	LG23
Schu_LG18G001890	LG18G001890	LG18
Schu_LG04G007550	LG04G007550	LG04
Schu_LG10G001540	LG10G001540	LG10
Schu_LG22G002500	LG22G002500	LG22
Schu_LG21G007650	LG21G007650	LG21
Schu_LG17G009060	LG17G009060	LG17
Schu_LG20G005600	LG20G005600	LG20
Schu_LG15G008510	LG15G008510	LG15
Schu_LG10G010940	LG10G010940	LG10
Schu_LG24G000210	LG24G000210	LG24
Schu_LG17G000510	LG17G000510	LG17
Schu_LG08G000550	LG08G000550	LG08
Schu_LG06G002210	LG06G002210	LG06
Schu_LG16G001170	LG16G001170	LG16
Schu_LG12G000460	LG12G000460	LG12
Schu_LG14G009900	LG14G009900	LG14
Schu_LG24G003270	LG24G003270	LG24
Schu_LG02G010660	LG02G010660	LG02
Schu_LG06G004620	LG06G004620	LG06
Schu_LG13G000500	LG13G000500	LG13
Schu_LG04G011480	LG04G011480	LG04
Schu_LG09G008850	LG09G008850	LG09
Schu_LG04G006680	LG04G006680	LG04
Schu_LG08G005280	LG08G005280	LG08
Schu_LG18G001620	LG18G001620	LG18
Schu_LG12G008020	LG12G008020	LG12
Schu_LG21G004870	LG21G004870	LG21
Schu_LG11G006660	LG11G006660	LG11
Schu_LG03G011870	LG03G011870	LG03
Schu_LG23G003060	LG23G003060	LG23
Schu_LG17G002310	LG17G002310	LG17
Schu_LG07G008570	LG07G008570	LG07
Schu_LG03G009930	LG03G009930	LG03
Schu_LG01G008770	LG01G008770	LG01
Schu_LG14G006830	LG14G006830	LG14
Schu_LG06G004080	LG06G004080	LG06
Schu_LG14G004810	LG14G004810	LG14
Schu_LG16G008860	LG16G008860	LG16
Schu_LG08G008210	LG08G008210	LG08
Schu_LG15G000280	LG15G000280	LG15
Schu_LG14G004050	LG14G004050	LG14
Schu_LG11G007040	LG11G007040	LG11
Schu_LG07G006130	LG07G006130	LG07
Schu_LG14G008260	LG14G008260	LG14
Schu_LG23G000140	LG23G000140	LG23
Schu_LG18G004930	LG18G004930	LG18
Schu_LG07G006890	LG07G006890	LG07
Schu_LG09G006330	LG09G006330	LG09
Schu_LG13G008450	LG13G008450	LG13
Schu_LG07G008680	LG07G008680	LG07
Schu_LG13G008010	LG13G008010	LG13
Schu_LG03G007770	LG03G007770	LG03
Schu_LG21G004550	LG21G004550	LG21
Schu_LG03G009130	LG03G009130	LG03
Schu_LG13G002500	LG13G002500	LG13
Schu_LG19G002700	LG19G002700	LG19
Schu_LG09G002490	LG09G002490	LG09
Schu_LG23G003470	LG23G003470	LG23
Schu_LG05G001550	LG05G001550	LG05
Schu_LG04G002600	LG04G002600	LG04
Schu_LG10G002880	LG10G002880	LG10
Schu_LG03G003000	LG03G003000	LG03
Schu_LG04G006210	LG04G006210	LG04
Schu_LG17G007250	LG17G007250	LG17
Schu_LG24G001380	LG24G001380	LG24
Schu_LG17G004720	LG17G004720	LG17
Schu_LG22G000330	LG22G000330	LG22
Schu_LG10G002890	LG10G002890	LG10
Schu_LG08G000220	LG08G000220	LG08
Schu_LG03G004360	LG03G004360	LG03
Schu_LG15G002150	LG15G002150	LG15
Schu_LG20G006230	LG20G006230	LG20
Schu_LG15G000500	LG15G000500	LG15
Schu_LG14G002550	LG14G002550	LG14
Schu_LG24G000080	LG24G000080	LG24
Schu_LG09G002710	LG09G002710	LG09
Schu_LG09G006150	LG09G006150	LG09
Schu_LG02G004690	LG02G004690	LG02
Schu_LG05G010600	LG05G010600	LG05
Schu_LG10G004940	LG10G004940	LG10
Schu_LG23G004430	LG23G004430	LG23
Schu_LG03G008220	LG03G008220	LG03
Schu_LG06G010540	LG06G010540	LG06
Schu_LG14G002860	LG14G002860	LG14
Schu_LG06G005330	LG06G005330	LG06
Schu_LG17G000410	LG17G000410	LG17
Schu_LG08G002600	LG08G002600	LG08
Schu_LG09G001490	LG09G001490	LG09
Schu_LG09G003560	LG09G003560	LG09
Schu_LG01G002750	LG01G002750	LG01
Schu_LG15G009780	LG15G009780	LG15
Schu_LG17G002620	LG17G002620	LG17
Schu_LG14G002470	LG14G002470	LG14
Schu_LG24G005600	LG24G005600	LG24
Schu_LG10G006920	LG10G006920	LG10
Schu_LG22G000690	LG22G000690	LG22
Schu_LG21G009530	LG21G009530	LG21
Schu_LG12G004600	LG12G004600	LG12
Schu_LG15G001670	LG15G001670	LG15
Schu_LG15G005130	LG15G005130	LG15
Schu_LG24G004960	LG24G004960	LG24
Schu_LG05G000360	LG05G000360	LG05
Schu_LG05G004610	LG05G004610	LG05
Schu_LG21G005700	LG21G005700	LG21
Schu_LG24G005260	LG24G005260	LG24
Schu_LG03G010990	LG03G010990	LG03
Schu_LG11G006750	LG11G006750	LG11
Schu_LG09G001780	LG09G001780	LG09
Schu_LG05G009560	LG05G009560	LG05
Schu_LG16G003640	LG16G003640	LG16
Schu_LG11G005400	LG11G005400	LG11
Schu_LG23G004900	LG23G004900	LG23
Schu_LG08G005200	LG08G005200	LG08
Schu_LG09G002290	LG09G002290	LG09
Schu_LG18G009100	LG18G009100	LG18
Schu_LG14G000980	LG14G000980	LG14
Schu_LG10G008420	LG10G008420	LG10
Schu_LG11G002150	LG11G002150	LG11
Schu_LG04G002410	LG04G002410	LG04
Schu_LG08G009240	LG08G009240	LG08
Schu_LG05G007090	LG05G007090	LG05
Schu_LG15G004150	LG15G004150	LG15
Schu_LG03G008290	LG03G008290	LG03
Schu_LG17G009660	LG17G009660	LG17
Schu_LG17G008350	LG17G008350	LG17
Schu_LG24G002510	LG24G002510	LG24
[truncated: 21,948 more rows]

## Sheet: c
Supplementary Table S2c. The list of non-coding RNAs(tRNA/rRNA/miRNA/pseudogene).
Chromosome ID	Source	Non-coding RNA type	Start	End	Score	Strand	Phase	Attributes
Contig00095	tRNAscan-SE	tRNA	16219	16300	85.34	+	.	ID=tRNA_0001; Type=Ser; Anti-codon=GCT; structure=">>>>>>>..>>>..........<<<.>>>>>.......<<<<<.>>>>...<<<<..>>>>>.......<<<<<<<<<<<<.";
Contig00095	tRNAscan-SE	tRNA	16825	16897	50.12	+	.	ID=tRNA_0002; Type=Ala; Anti-codon=AGC; structure=">>>>>>>..>>>>........<<<<.>>.>>.......<<.<<.....>>>>>.......<<<<<<<<<<<<.";
Contig00095	tRNAscan-SE	tRNA	17255	17327	63.06	+	.	ID=tRNA_0003; Type=Ala; Anti-codon=AGC; structure=">>>>>>>..>>>>........<<<<.>>>>>.......<<<<<.....>>>>>.......<<<<<<<<<<<<.";
Contig00095	tRNAscan-SE	tRNA	22293	22365	56.08	-	.	ID=tRNA_0006; Type=Ala; Anti-codon=AGC; structure=">>>>>>>..>>>>........<<<<.>>>>>.......<<<<<.....>>>>>.......<<<<<<<<<<<<.";
Contig00095	tRNAscan-SE	tRNA	22885	22970	30.96	-	.	ID=tRNA_0005; Type=Ser; Anti-codon=GCT; structure=">>>>.>.....>>.........<<..>>>>>.......<<<<<.>>>>...<<<<..>>>>>.......<<<<<.....<.<<<<.";
Contig00095	tRNAscan-SE	tRNA	25988	26060	61.59	+	.	ID=tRNA_0004; Type=Ala; Anti-codon=AGC; structure=">>>>>>>..>>>>........<<<<.>>>>>.......<<<<<.....>>>>>.......<<<<<<<<<<<<.";
LG01	tRNAscan-SE	tRNA	257623	257705	21.19	-	.	ID=tRNA_0116; Type=Pseudo; Anti-codon=CCC; structure=">>..>.>..>>............<<.>>>...........<<<...>>><<<....>>>>>.......<<<..<<<.<..<<.";
LG01	tRNAscan-SE	tRNA	582733	582804	73.65	-	.	ID=tRNA_0115; Type=Gln; Anti-codon=CTG; structure=">>>>>>>..>>>>........<<<<.>>>>>.......<<<<<....>>>>>.......<<<<<<<<<<<<.";
LG01	tRNAscan-SE	tRNA	1473335	1473407	22.81	-	.	ID=tRNA_0114; Type=Pseudo; Anti-codon=ACC; structure=".>....>..>>>>.......<<<<..>.>>.........<<<......>>.>>.......<<.<<<....<..";
LG01	tRNAscan-SE	tRNA	1705409	1705481	77.56	-	.	ID=tRNA_0113; Type=Val; Anti-codon=TAC; structure=">>>>>>>..>>>..........<<<.>>>>>.......<<<<<.....>>>>>.......<<<<<<<<<<<<.";
LG01	tRNAscan-SE	tRNA	1705700	1705772	82.1	-	.	ID=tRNA_0112; Type=Val; Anti-codon=TAC; structure=">>>>>>>..>>>..........<<<.>>>>>.......<<<<<.....>>>>>.......<<<<<<<<<<<<.";
LG01	tRNAscan-SE	tRNA	1706101	1706173	77.56	-	.	ID=tRNA_0111; Type=Val; Anti-codon=TAC; structure=">>>>>>>..>>>..........<<<.>>>>>.......<<<<<.....>>>>>.......<<<<<<<<<<<<.";
LG01	tRNAscan-SE	tRNA	1707912	1707984	71.28	+	.	ID=tRNA_0117; Type=Val; Anti-codon=TAC; structure=">>>>>>>..>>>..........<<<..>>>>.......<<<<......>>>>>.......<<<<<<<<<<<<.";
LG01	tRNAscan-SE	tRNA	1710717	1710789	77.56	+	.	ID=tRNA_0104; Type=Val; Anti-codon=TAC; structure=">>>>>>>..>>>..........<<<.>>>>>.......<<<<<.....>>>>>.......<<<<<<<<<<<<.";
LG01	tRNAscan-SE	tRNA	3958876	3958951	34.91	+	.	ID=tRNA_0105; Type=Pseudo; Anti-codon=TTT; structure=">>>>..>..>>>>.......<<<<.>.>>>.........<<<<........>.>>>.......<<<.<<..<<<<.";
LG01	tRNAscan-SE	tRNA	16175387	16175458	48.37	-	.	ID=tRNA_0110; Type=Glu; Anti-codon=TTC; structure=">>>>>>>..>>>..........<<<.>>>>.........<<<<.....>>>>.......<<<<.<<<<<<<.";
LG01	tRNAscan-SE	tRNA	20694467	20694549	22.15	+	.	ID=tRNA_0106; Type=Pseudo; Anti-codon=CCC; structure=">>..>.>..>>............<<.>>>...........<<<...>>><<<....>>>>>.......<<<..<<<.<..<<.";
LG01	tRNAscan-SE	tRNA	23887728	23887799	66.12	+	.	ID=tRNA_0107; Type=His; Anti-codon=GTG; structure=">>>>>>>..>>>>........<<<<.>>>>>.......<<<<<....>>>>>.......<<<<<<<<<<<<.";
LG01	tRNAscan-SE	tRNA	24368304	24368376	40.61	+	.	ID=tRNA_0108; Type=Pseudo; Anti-codon=CGG; structure=".>..>>>..>>>.........<<<.>>.>>.......<<.<<......>>>>.......<<<<..<<<..<..";
LG01	tRNAscan-SE	tRNA	29791015	29791088	84.06	-	.	ID=tRNA_0103; Type=Thr; Anti-codon=AGT; structure=">>>>>>>..>>>>.........<<<<.>>>>>.......<<<<<.....>>>>>.......<<<<<<<<<<<<.";
LG01	tRNAscan-SE	tRNA	31360728	31360800	23.74	+	.	ID=tRNA_0109; Type=Pseudo; Anti-codon=???; structure=">.>>..>..>>>>.......<<<<...>>.>>......<<.<<.....>>>>>.......<<<<<<..<<.<.";
LG01	tRNAscan-SE	tRNA	35578912	35578983	41.47	-	.	ID=tRNA_0067; Type=His; Anti-codon=GTG; structure=">>>>>>>..>>>>........<<<<..>>>>.......<<<<.....>>>>>.......<<<<<<<<<<<<.";
LG01	tRNAscan-SE	tRNA	36130876	36130950	20.35	-	.	ID=tRNA_0066; Type=Pseudo; Anti-codon=ACC; structure=">>>.>>.....>>>>.......<<<<...>>.>.......<.<<......>.>>>.......<<<.<.<<.<<<.";
LG01	tRNAscan-SE	tRNA	36594821	36594897	20.81	-	.	ID=tRNA_0065; Type=Pseudo; Anti-codon=CCC; structure=">>..>.>..>>............<<.>>>...........<<<.....>>>>>..........<<<<.<<.<..<<.";
LG01	tRNAscan-SE	tRNA	36765493	36765562	28.66	+	.	ID=tRNA_0064; Type=Pseudo; Anti-codon=???; structure=">.>>..>..>>>>.......<<<<..>.........<........>.>>>.......<<<.<<..<<.<.";
LG02	tRNAscan-SE	tRNA	593516	593598	20.76	+	.	ID=tRNA_0035; Type=Pseudo; Anti-codon=CCC; structure=">>..>.>..>>............<<.>>>...........<<<...>>><<<....>>>>>.......<<<..<<<.<..<<.";
LG02	tRNAscan-SE	tRNA	1038591	1038673	20.76	+	.	ID=tRNA_0036; Type=Pseudo; Anti-codon=CCC; structure=">>..>.>..>>............<<.>>>...........<<<...>>><<<....>>>>>.......<<<..<<<.<..<<.";
LG02	tRNAscan-SE	tRNA	4458488	4458558	22.4	-	.	ID=tRNA_0045; Type=Pseudo; Anti-codon=CAT; structure=">>.>.>>..>>>.........<<<.>.>>>.......<<<.<.....>>>>>......<<<<<<<.<.<<.";
LG02	tRNAscan-SE	tRNA	5009485	5009556	39.81	+	.	ID=tRNA_0033; Type=Asp; Anti-codon=GTC; structure=">>>>>>>..>>>>........<<<<.>>>>>.......<<<<<....>.>>>.......<<<.<<<<<<<<.";
LG02	tRNAscan-SE	tRNA	7765038	7765109	39.25	-	.	ID=tRNA_0043; Type=Pseudo; Anti-codon=ACA; structure=">>...>>..>>>>.......<<<<..>>>>.......<<<<......>.>>>.......<<<.<<<...<<.";
LG02	tRNAscan-SE	tRNA	7906276	7906347	24.54	-	.	ID=tRNA_0042; Type=Pseudo; Anti-codon=ACC; structure=".>>>>....>>>>.......<<<<...>>>.........<<<......>..>>.......<<.<..<<<<..";
LG02	tRNAscan-SE	tRNA	8400198	8400269	75.92	+	.	ID=tRNA_0044; Type=Pro; Anti-codon=AGG; structure=">>>>>>>..>>>.........<<<.>>>>>.......<<<<<.....>>>>>.......<<<<<<<<<<<<.";
LG02	tRNAscan-SE	tRNA	9535639	9535711	20.96	+	.	ID=tRNA_0046; Type=Pseudo; Anti-codon=ATC; structure=">>.>>.....>>>>.......<<<<...>>>.........<<<......>.>.>.......<.<.<.<<.<<.";
LG02	tRNAscan-SE	tRNA	10533220	10533292	81.73	-	.	ID=tRNA_0041; Type=Thr; Anti-codon=TGT; structure=">>>>>>>..>>>>........<<<<.>>>>>.......<<<<<.....>>>>>.......<<<<<<<<<<<<.";
LG02	tRNAscan-SE	tRNA	10752155	10752227	28.76	+	.	ID=tRNA_0047; Type=Pseudo; Anti-codon=AGT; structure=">>.>>.....>>>........<<<...>>...........<<......>>>>>.......<<<<<..<<.<<.";
LG02	tRNAscan-SE	tRNA	13839254	13839324	48.55	+	.	ID=tRNA_0048; Type=Gly; Anti-codon=GCC; structure=">.>>>>>..>>>>.......<<<<.>>>>>.......<<<<<....>>>>>.......<<<<<<<<<<.<.";
LG02	tRNAscan-SE	tRNA	14229571	14229646	32.21	+	.	ID=tRNA_0049; Type=Gly; Anti-codon=CCC; structure=">>.>>.>...>>>>........<<<<..>>>>.......<<<<......>.>>>.......<<<.<..<.<<.<<.";
LG02	tRNAscan-SE	tRNA	14861660	14861732	20.64	+	.	ID=tRNA_0050; Type=Pseudo; Anti-codon=ACC; structure=">>>>>>..>>>>.......<<<<...>>>.........<<<......>.>.>.......<.<.<<<..<<<<.";
LG02	tRNAscan-SE	tRNA	18625475	18625547	84.19	+	.	ID=tRNA_0051; Type=Phe; Anti-codon=GAA; structure=">>>>>>>..>>>>........<<<<.>>>>>.......<<<<<.....>>>>>.......<<<<<<<<<<<<.";
LG02	tRNAscan-SE	tRNA	21288454	21288525	75	+	.	ID=tRNA_0052; Type=Glu; Anti-codon=TTC; structure=">>>>>>>..>>>>........<<<<.>>>>>.......<<<<<....>>>>>.......<<<<<<<<<<<<.";
LG02	tRNAscan-SE	tRNA	21338148	21338220	68.07	-	.	ID=tRNA_0040; Type=Arg; Anti-codon=ACG; structure=">>>>>>>..>>>..........<<<.>>>>>.......<<<<<.....>>>>>.......<<<<<<<<<<<<.";
LG02	tRNAscan-SE	tRNA	21346033	21346115	80.21	-	.	ID=tRNA_0039; Type=Ser; Anti-codon=AGA; structure=">>>>>>>..>>>..........<<<.>>>>>.......<<<<<.>.>>....<<.<..>>>>>.......<<<<<<<<<<<<.";
LG02	tRNAscan-SE	tRNA	21349685	21349766	88.95	-	.	ID=tRNA_0038; Type=Ser; Anti-codon=AGA; structure=">>>>>>>..>>>..........<<<.>>>>>.......<<<<<.>>>>...<<<<..>>>>>.......<<<<<<<<<<<<.";
LG02	tRNAscan-SE	tRNA	21350721	21350793	68.07	-	.	ID=tRNA_0037; Type=Arg; Anti-codon=ACG; structure=">>>>>>>..>>>..........<<<.>>>>>.......<<<<<.....>>>>>.......<<<<<<<<<<<<.";
LG02	tRNAscan-SE	tRNA	21351155	21351227	68.07	-	.	ID=tRNA_0036; Type=Arg; Anti-codon=ACG; structure=">>>>>>>..>>>..........<<<.>>>>>.......<<<<<.....>>>>>.......<<<<<<<<<<<<.";
LG02	tRNAscan-SE	tRNA	22148532	22148603	73.77	+	.	ID=tRNA_0034; Type=Gln; Anti-codon=TTG; structure=">>>>>>>..>>>>........<<<<.>>>>>.......<<<<<....>>>>>.......<<<<<<<<<<<<.";
LG02	tRNAscan-SE	tRNA	25307981	25308052	67.59	+	.	ID=tRNA_0035; Type=Glu; Anti-codon=TTC; structure=">>>>>>>..>>>>........<<<<.>>>>>.......<<<<<....>>>>>.......<<<<<<<<<<<<.";
LG02	tRNAscan-SE	tRNA	25309488	25309559	72.69	-	.	ID=tRNA_0095; Type=Glu; Anti-codon=CTC; structure=">>>>>>>..>>>>........<<<<.>>>>>.......<<<<<....>>>>>.......<<<<<<<<<<<<.";
LG02	tRNAscan-SE	tRNA	25309978	25310049	65.01	+	.	ID=tRNA_0068; Type=Glu; Anti-codon=TTC; structure=">>>>>>>..>>>>........<<<<.>>>>>.......<<<<<....>>>>>.......<<<<<<<<<<<<.";
LG02	tRNAscan-SE	tRNA	25317204	25317276	68.07	-	.	ID=tRNA_0094; Type=Arg; Anti-codon=ACG; structure=">>>>>>>..>>>..........<<<.>>>>>.......<<<<<.....>>>>>.......<<<<<<<<<<<<.";
LG02	tRNAscan-SE	tRNA	25318038	25318109	76.61	+	.	ID=tRNA_0079; Type=Glu; Anti-codon=CTC; structure=">>>>>>>..>>>>........<<<<.>>>>>.......<<<<<....>>>>>.......<<<<<<<<<<<<.";
LG02	tRNAscan-SE	tRNA	25325655	25325727	68.07	-	.	ID=tRNA_0093; Type=Arg; Anti-codon=ACG; structure=">>>>>>>..>>>..........<<<.>>>>>.......<<<<<.....>>>>>.......<<<<<<<<<<<<.";
LG02	tRNAscan-SE	tRNA	25390287	25390358	66.59	-	.	ID=tRNA_0092; Type=Glu; Anti-codon=CTC; structure=">>>>>>>..>>>>........<<<<.>>.>>.......<<.<<....>>>>>.......<<<<<<<<<<<<.";
LG02	tRNAscan-SE	tRNA	25390753	25390824	76.61	-	.	ID=tRNA_0091; Type=Glu; Anti-codon=CTC; structure=">>>>>>>..>>>>........<<<<.>>>>>.......<<<<<....>>>>>.......<<<<<<<<<<<<.";
LG02	tRNAscan-SE	tRNA	25393657	25393728	69.7	-	.	ID=tRNA_0089; Type=Glu; Anti-codon=CTC; structure=">>>>>>>..>>>>........<<<<.>>>>>.......<<<<<....>>>>>.......<<<<<<<<<<<<.";
LG02	tRNAscan-SE	tRNA	25394137	25394208	76.61	-	.	ID=tRNA_0088; Type=Glu; Anti-codon=CTC; structure=">>>>>>>..>>>>........<<<<.>>>>>.......<<<<<....>>>>>.......<<<<<<<<<<<<.";
LG02	tRNAscan-SE	tRNA	25418754	25418825	76.61	-	.	ID=tRNA_0087; Type=Glu; Anti-codon=CTC; structure=">>>>>>>..>>>>........<<<<.>>>>>.......<<<<<....>>>>>.......<<<<<<<<<<<<.";
LG02	tRNAscan-SE	tRNA	25451807	25451878	69.63	-	.	ID=tRNA_0086; Type=Glu; Anti-codon=CTC; structure=">>>>>>>..>>>>........<<<<.>>>>>.......<<<<<....>>.>>.......<<.<<<<<<<<<.";
LG02	tRNAscan-SE	tRNA	25453953	25454024	76.61	-	.	ID=tRNA_0085; Type=Glu; Anti-codon=CTC; structure=">>>>>>>..>>>>........<<<<.>>>>>.......<<<<<....>>>>>.......<<<<<<<<<<<<.";
LG02	tRNAscan-SE	tRNA	25454309	25454381	68.07	+	.	ID=tRNA_0090; Type=Arg; Anti-codon=ACG; structure=">>>>>>>..>>>..........<<<.>>>>>.......<<<<<.....>>>>>.......<<<<<<<<<<<<.";
LG02	tRNAscan-SE	tRNA	25454707	25454779	67.12	+	.	ID=tRNA_0096; Type=Arg; Anti-codon=ACG; structure=">>>>>>>..>>>..........<<<.>>>>>.......<<<<<.....>>>>>.......<<<<<<<<<<<<.";
LG02	tRNAscan-SE	tRNA	25457918	25457989	76.61	-	.	ID=tRNA_0084; Type=Glu; Anti-codon=CTC; structure=">>>>>>>..>>>>........<<<<.>>>>>.......<<<<<....>>>>>.......<<<<<<<<<<<<.";
LG02	tRNAscan-SE	tRNA	25460989	25461060	76.61	-	.	ID=tRNA_0083; Type=Glu; Anti-codon=CTC; structure=">>>>>>>..>>>>........<<<<.>>>>>.......<<<<<....>>>>>.......<<<<<<<<<<<<.";
LG02	tRNAscan-SE	tRNA	25582116	25582188	84.19	+	.	ID=tRNA_0097; Type=Phe; Anti-codon=GAA; structure=">>>>>>>..>>>>........<<<<.>>>>>.......<<<<<.....>>>>>.......<<<<<<<<<<<<.";
LG02	tRNAscan-SE	tRNA	25638215	25638287	84.19	+	.	ID=tRNA_0098; Type=Phe; Anti-codon=GAA; structure=">>>>>>>..>>>>........<<<<.>>>>>.......<<<<<.....>>>>>.......<<<<<<<<<<<<.";
LG02	tRNAscan-SE	tRNA	25640122	25640194	81.13	+	.	ID=tRNA_0099; Type=Phe; Anti-codon=GAA; structure=">>>>>>>..>>>>........<<<<.>>>>>.......<<<<<.....>>>>>.......<<<<<<<<<<<<.";
LG02	tRNAscan-SE	tRNA	26625434	26625506	43.87	-	.	ID=tRNA_0082; Type=Phe; Anti-codon=GAA; structure=">>.>>>>..>>>>........<<<<..>>>>.......<<<<......>>>>>.......<<<<<<<<<.<<.";
LG02	tRNAscan-SE	tRNA	27544577	27544647	33.11	-	.	ID=tRNA_0081; Type=Pseudo; Anti-codon=TTG; structure=".>.>>>...>>>>.......<<<<.>>.>>.......<<.<<......>>>.......<<<...<<<.<..";
LG02	tRNAscan-SE	tRNA	30006096	30006168	22.52	-	.	ID=tRNA_0080; Type=Pseudo; Anti-codon=ACC; structure=">..>..>..>>>>.......<<<<...>>>.........<<<......>.>>>.......<<<.<<..<..<.";
LG02	tRNAscan-SE	tRNA	30052289	30052361	26.6	-	.	ID=tRNA_0078; Type=Pseudo; Anti-codon=ACC; structure=">.>...>..>>>>.......<<<<...>>>.........<<<......>.>>>.......<<<.<<...<.<.";
LG02	tRNAscan-SE	tRNA	32035052	32035124	24.09	+	.	ID=tRNA_0100; Type=Pseudo; Anti-codon=ACC; structure=">.>>>>>..>>>>.......<<<<...>>>.........<<<......>>.>.......<.<...<<<<<<<.";
LG02	tRNAscan-SE	tRNA	32989542	32989614	21.51	-	.	ID=tRNA_0077; Type=Pseudo; Anti-codon=ACC; structure=">.>>..>..>>>>.......<<<<...>>>.........<<<......>.>>>.......<<<.<<..<<.<.";
LG02	tRNAscan-SE	tRNA	34575552	34575624	46.09	-	.	ID=tRNA_0076; Type=Pseudo; Anti-codon=GAA; structure=".>>.>.>...>>>........<<<..>>>>>.......<<<<<.....>>>>>.......<<<<<<.<.<<..";
LG02	tRNAscan-SE	tRNA	34576033	34576105	84.19	-	.	ID=tRNA_0075; Type=Phe; Anti-codon=GAA; structure=">>>>>>>..>>>>........<<<<.>>>>>.......<<<<<.....>>>>>.......<<<<<<<<<<<<.";
LG02	tRNAscan-SE	tRNA	34785332	34785404	77.72	-	.	ID=tRNA_0074; Type=Phe; Anti-codon=GAA; structure=">>>>>>>..>>>>........<<<<.>>>>>.......<<<<<.....>>>>>.......<<<<<<<<<<<<.";
LG02	tRNAscan-SE	tRNA	34787073	34787145	84.19	-	.	ID=tRNA_0073; Type=Phe; Anti-codon=GAA; structure=">>>>>>>..>>>>........<<<<.>>>>>.......<<<<<.....>>>>>.......<<<<<<<<<<<<.";
LG02	tRNAscan-SE	tRNA	34788170	34788242	84.19	-	.	ID=tRNA_0072; Type=Phe; Anti-codon=GAA; structure=">>>>>>>..>>>>........<<<<.>>>>>.......<<<<<.....>>>>>.......<<<<<<<<<<<<.";
LG02	tRNAscan-SE	tRNA	34790104	34790176	81.13	-	.	ID=tRNA_0071; Type=Phe; Anti-codon=GAA; structure=">>>>>>>..>>>>........<<<<.>>>>>.......<<<<<.....>>>>>.......<<<<<<<<<<<<.";
LG02	tRNAscan-SE	tRNA	34791198	34791271	60.99	-	.	ID=tRNA_0070; Type=Phe; Anti-codon=GAA; structure=">>>>>>>..>>>>........<<<<.>>>>>.......<<<<<.....>>.>>.......<<<<<<<<<..<<.";
LG02	tRNAscan-SE	tRNA	34793130	34793202	81.13	-	.	ID=tRNA_0069; Type=Phe; Anti-codon=GAA; structure=">>>>>>>..>>>>........<<<<.>>>>>.......<<<<<.....>>>>>.......<<<<<<<<<<<<.";
LG02	tRNAscan-SE	tRNA	34794231	34794350	43.76	-	.	ID=tRNA_0101; Type=Asn; Anti-codon=GTT; structure=">>>>>>>..>>>>........<<<.<.>>>.........................................................<<<.....>>>>>.......<<<<<<<<<<<<.";
LG03	tRNAscan-SE	tRNA	21724	21796	24.04	-	.	ID=tRNA_0020; Type=Pseudo; Anti-codon=AGT; structure=">..>>.>..>>.>........<.<<..>>>.........<<<......>>.>>.......<<.<<<.<<..<.";
LG03	tRNAscan-SE	tRNA	1514846	1514917	69.92	-	.	ID=tRNA_0009; Type=Gln; Anti-codon=TTG; structure=">>>>>>>..>>>>........<<<<.>>>>>.......<<<<<....>>>>>.......<<<<<<<<<<<<.";
LG03	tRNAscan-SE	tRNA	1652939	1653010	70.57	+	.	ID=tRNA_0021; Type=Pro; Anti-codon=CGG; structure=">>>>>>>..>>>.........<<<.>>>>>.......<<<<<.....>>>>>.......<<<<<<<<<<<<.";
LG03	tRNAscan-SE	tRNA	1653206	1653277	27.85	+	.	ID=tRNA_0022; Type=Pseudo; Anti-codon=AGG; structure="..>>>>>..>>>.........<<<.>..>.........<..<.....>>>>>.......<<<<<<<<<<...";
LG03	tRNAscan-SE	tRNA	1662295	1662366	71.61	+	.	ID=tRNA_0023; Type=Pro; Anti-codon=AGG; structure=">>>>>>>..>>>.........<<<.>>>>>.......<<<<<.....>>>>>.......<<<<<<<<<<<<.";
LG03	tRNAscan-SE	tRNA	1662934	1663005	69.96	+	.	ID=tRNA_0024; Type=Pro; Anti-codon=AGG; structure=">>>>>>>..>>>.........<<<.>>.>>.......<<.<<.....>>>>>.......<<<<<<<<<<<<.";
LG03	tRNAscan-SE	tRNA	1663569	1663639	63.84	+	.	ID=tRNA_0025; Type=Pro; Anti-codon=AGG; structure=">>>>>>>..>>>.........<<<.>>>>>.......<<<<<....>>.>>.......<<.<<<<<<<<<.";
LG03	tRNAscan-SE	tRNA	1664199	1664270	57.87	+	.	ID=tRNA_0026; Type=Pro; Anti-codon=AGG; structure=">>>>>>>..>>>.........<<<.>>>>>.......<<<<<.....>>>>>.......<<<<<<<<<<<<.";
LG03	tRNAscan-SE	tRNA	1664830	1664901	76.15	+	.	ID=tRNA_0027; Type=Pro; Anti-codon=TGG; structure=">>>>>>>..>>>.........<<<.>>>>>.......<<<<<.....>>>>>.......<<<<<<<<<<<<.";
LG03	tRNAscan-SE	tRNA	1665467	1665538	76.15	+	.	ID=tRNA_0010; Type=Pro; Anti-codon=TGG; structure=">>>>>>>..>>>.........<<<.>>>>>.......<<<<<.....>>>>>.......<<<<<<<<<<<<.";
LG03	tRNAscan-SE	tRNA	1666105	1666176	75.92	+	.	ID=tRNA_0011; Type=Pro; Anti-codon=AGG; structure=">>>>>>>..>>>.........<<<.>>>>>.......<<<<<.....>>>>>.......<<<<<<<<<<<<.";
LG03	tRNAscan-SE	tRNA	1666743	1666814	75.92	+	.	ID=tRNA_0012; Type=Pro; Anti-codon=AGG; structure=">>>>>>>..>>>.........<<<.>>>>>.......<<<<<.....>>>>>.......<<<<<<<<<<<<.";
LG03	tRNAscan-SE	tRNA	1667381	1667452	64.79	+	.	ID=tRNA_0013; Type=Pro; Anti-codon=TGG; structure=">>.>>>>..>>>.........<<<.>>>>>.......<<<<<.....>>>>>.......<<<<<<<<<.<<.";
LG03	tRNAscan-SE	tRNA	1668018	1668089	69.17	+	.	ID=tRNA_0014; Type=Pro; Anti-codon=TGG; structure=">>>>>>>..>>>.........<<<.>>>>>.......<<<<<.....>>.>>.......<<.<<<<<<<<<.";
LG03	tRNAscan-SE	tRNA	1668649	1668720	76.15	+	.	ID=tRNA_0015; Type=Pro; Anti-codon=TGG; structure=">>>>>>>..>>>.........<<<.>>>>>.......<<<<<.....>>>>>.......<<<<<<<<<<<<.";
LG03	tRNAscan-SE	tRNA	1669287	1669358	75.92	+	.	ID=tRNA_0016; Type=Pro; Anti-codon=AGG; structure=">>>>>>>..>>>.........<<<.>>>>>.......<<<<<.....>>>>>.......<<<<<<<<<<<<.";
LG03	tRNAscan-SE	tRNA	1669925	1669996	75.92	+	.	ID=tRNA_0017; Type=Pro; Anti-codon=AGG; structure=">>>>>>>..>>>.........<<<.>>>>>.......<<<<<.....>>>>>.......<<<<<<<<<<<<.";
LG03	tRNAscan-SE	tRNA	1670556	1670627	75.92	+	.	ID=tRNA_0018; Type=Pro; Anti-codon=AGG; structure=">>>>>>>..>>>.........<<<.>>>>>.......<<<<<.....>>>>>.......<<<<<<<<<<<<.";
LG03	tRNAscan-SE	tRNA	1671190	1671261	71.36	+	.	ID=tRNA_0019; Type=Pro; Anti-codon=AGG; structure=">>>>>>>..>>>.........<<<.>>>>>.......<<<<<.....>>>>>.......<<<<<<<<<<<<.";
LG03	tRNAscan-SE	tRNA	1675317	1675387	64.08	+	.	ID=tRNA_0001; Type=Pro; Anti-codon=TGG; structure=">>>>>>>..>>>.........<<<.>>>>>.......<<<<<....>>.>>.......<<.<<<<<<<<<.";
LG03	tRNAscan-SE	tRNA	1675952	1676022	64.08	+	.	ID=tRNA_0012; Type=Pro; Anti-codon=TGG; structure=">>>>>>>..>>>.........<<<.>>>>>.......<<<<<....>>.>>.......<<.<<<<<<<<<.";
LG03	tRNAscan-SE	tRNA	1676589	1676660	76.15	+	.	ID=tRNA_0018; Type=Pro; Anti-codon=TGG; structure=">>>>>>>..>>>.........<<<.>>>>>.......<<<<<.....>>>>>.......<<<<<<<<<<<<.";
LG03	tRNAscan-SE	tRNA	1677225	1677294	52.2	+	.	ID=tRNA_0019; Type=Undet; Anti-codon=???; structure=">>>>>>>..>>>.........<<<.>>>>........<<<<....>>.>>.......<<.<<<<<<<<<.";
LG03	tRNAscan-SE	tRNA	1677854	1677924	64.08	+	.	ID=tRNA_0020; Type=Pro; Anti-codon=TGG; structure=">>>>>>>..>>>.........<<<.>>>>>.......<<<<<....>>.>>.......<<.<<<<<<<<<.";
LG03	tRNAscan-SE	tRNA	1678489	1678560	76.15	+	.	ID=tRNA_0021; Type=Pro; Anti-codon=TGG; structure=">>>>>>>..>>>.........<<<.>>>>>.......<<<<<.....>>>>>.......<<<<<<<<<<<<.";
LG03	tRNAscan-SE	tRNA	1679127	1679198	76.15	+	.	ID=tRNA_0022; Type=Pro; Anti-codon=TGG; structure=">>>>>>>..>>>.........<<<.>>>>>.......<<<<<.....>>>>>.......<<<<<<<<<<<<.";
LG03	tRNAscan-SE	tRNA	1679764	1679835	69.97	+	.	ID=tRNA_0023; Type=Pro; Anti-codon=TGG; structure=">>>>>>>..>>...........<<.>>>>>.......<<<<<.....>>>>>.......<<<<<<<<<<<<.";
LG03	tRNAscan-SE	tRNA	1680401	1680471	64.08	+	.	ID=tRNA_0024; Type=Pro; Anti-codon=TGG; structure=">>>>>>>..>>>.........<<<.>>>>>.......<<<<<....>>.>>.......<<.<<<<<<<<<.";
LG03	tRNAscan-SE	tRNA	1681037	1681108	76.15	+	.	ID=tRNA_0002; Type=Pro; Anti-codon=TGG; structure=">>>>>>>..>>>.........<<<.>>>>>.......<<<<<.....>>>>>.......<<<<<<<<<<<<.";
LG03	tRNAscan-SE	tRNA	1681675	1681744	50.69	+	.	ID=tRNA_0003; Type=Undet; Anti-codon=???; structure=">>>>>>>..>>>.........<<<.>>>>>......<<<<<....>>.>>.......<<.<<<<<<<<<.";
LG03	tRNAscan-SE	tRNA	1682310	1682380	64.08	+	.	ID=tRNA_0004; Type=Pro; Anti-codon=TGG; structure=">>>>>>>..>>>.........<<<.>>>>>.......<<<<<....>>.>>.......<<.<<<<<<<<<.";
LG03	tRNAscan-SE	tRNA	1682946	1683017	76.15	+	.	ID=tRNA_0005; Type=Pro; Anti-codon=TGG; structure=">>>>>>>..>>>.........<<<.>>>>>.......<<<<<.....>>>>>.......<<<<<<<<<<<<.";
LG03	tRNAscan-SE	tRNA	1683584	1683655	69.41	+	.	ID=tRNA_0006; Type=Pro; Anti-codon=CGG; structure=">>>>>>>..>>>.........<<<.>>>>>.......<<<<<.....>.>>>.......<<<.<<<<<<<<.";
LG03	tRNAscan-SE	tRNA	1684222	1684293	76.15	+	.	ID=tRNA_0007; Type=Pro; Anti-codon=TGG; structure=">>>>>>>..>>>.........<<<.>>>>>.......<<<<<.....>>>>>.......<<<<<<<<<<<<.";
LG03	tRNAscan-SE	tRNA	1684863	1684934	76.15	+	.	ID=tRNA_0008; Type=Pro; Anti-codon=TGG; structure=">>>>>>>..>>>.........<<<.>>>>>.......<<<<<.....>>>>>.......<<<<<<<<<<<<.";
LG03	tRNAscan-SE	tRNA	1685501	1685571	64.08	+	.	ID=tRNA_0009; Type=Pro; Anti-codon=TGG; structure=">>>>>>>..>>>.........<<<.>>>>>.......<<<<<....>>.>>.......<<.<<<<<<<<<.";
LG03	tRNAscan-SE	tRNA	1686131	1686202	69.24	+	.	ID=tRNA_0010; Type=Pro; Anti-codon=TGG; structure=">>>>>>>..>>>.........<<<.>>>>>.......<<<<<.....>>>>>.......<<<<<<<<<<<<.";
LG03	tRNAscan-SE	tRNA	1689266	1689337	69.97	+	.	ID=tRNA_0011; Type=Pro; Anti-codon=TGG; structure=">>>>>>>..>>...........<<.>>>>>.......<<<<<.....>>>>>.......<<<<<<<<<<<<.";
LG03	tRNAscan-SE	tRNA	1689897	1689968	66.22	+	.	ID=tRNA_0013; Type=Pro; Anti-codon=CGG; structure=">>>>>>>..>>>.........<<<.>>>.>.......<.<<<.....>>>>>.......<<<<<<<<<<<<.";
LG03	tRNAscan-SE	tRNA	1690538	1690609	76.15	+	.	ID=tRNA_0014; Type=Pro; Anti-codon=TGG; structure=">>>>>>>..>>>.........<<<.>>>>>.......<<<<<.....>>>>>.......<<<<<<<<<<<<.";
LG03	tRNAscan-SE	tRNA	1691168	1691238	67.5	+	.	ID=tRNA_0015; Type=Undet; Anti-codon=???; structure=">>>>>>>..>>>.........<<<.>>>>>......<<<<<.....>>>>>.......<<<<<<<<<<<<.";
LG03	tRNAscan-SE	tRNA	1691806	1691877	69.96	+	.	ID=tRNA_0016; Type=Pro; Anti-codon=AGG; structure=">>>>>>>..>>>.........<<<.>>>>>.......<<<<<.....>>>>>.......<<<<<<<<<<<<.";
LG03	tRNAscan-SE	tRNA	1692437	1692507	64.08	+	.	ID=tRNA_0017; Type=Pro; Anti-codon=TGG; structure=">>>>>>>..>>>.........<<<.>>>>>.......<<<<<....>>.>>.......<<.<<<<<<<<<.";
LG03	tRNAscan-SE	tRNA	5984528	5984599	41.87	+	.	ID=tRNA_0001; Type=Pseudo; Anti-codon=GTA; structure=">>>>>>>..>>>.........<<<.>>>>.........<<<<.....>.>.>.......<.<.<<<<<<<<.";
LG03	tRNAscan-SE	tRNA	6001382	6001453	55.42	-	.	ID=tRNA_0021; Type=Cys; Anti-codon=GCA; structure=">>>>>.>..>>>>.......<<<<.>.>>>.......<<<.<.....>>>>>.......<<<<<<.<<<<<.";
LG03	tRNAscan-SE	tRNA	6116025	6116096	61.41	-	.	ID=tRNA_0020; Type=Cys; Anti-codon=GCA; structure=">>>>>>>..>>>>.......<<<<.>>>.>.......<.<<<.....>>>>>.......<<<<<<<<<<<<.";
LG03	tRNAscan-SE	tRNA	6116458	6116529	74.64	-	.	ID=tRNA_0019; Type=Cys; Anti-codon=GCA; structure=">>>>>>>..>>>>.......<<<<.>>>>>.......<<<<<.....>>>>>.......<<<<<<<<<<<<.";
LG03	tRNAscan-SE	tRNA	6117637	6117708	74.64	-	.	ID=tRNA_0018; Type=Cys; Anti-codon=GCA; structure=">>>>>>>..>>>>.......<<<<.>>>>>.......<<<<<.....>>>>>.......<<<<<<<<<<<<.";
LG03	tRNAscan-SE	tRNA	6118055	6118126	61.24	-	.	ID=tRNA_0017; Type=Cys; Anti-codon=GCA; structure=".>>>>>>..>>>>.......<<<<.>>>>>.......<<<<<.....>>>>>.......<<<<<<<<<<<..";
LG03	tRNAscan-SE	tRNA	7730259	7730341	22.15	+	.	ID=tRNA_0012; Type=Pseudo; Anti-codon=CCC; structure=">>..>.>..>>............<<.>>>...........<<<...>>><<<....>>>>>.......<<<..<<<.<..<<.";
LG03	tRNAscan-SE	tRNA	8726461	8726542	69.49	-	.	ID=tRNA_0016; Type=Leu; Anti-codon=AAG; structure=">>>>>>>..>>>...........<<<.>>>>>.......<<<<<.>>>>..<<<<..>>>>>.......<<<<<<<<<<<<.";
LG03	tRNAscan-SE	tRNA	8727804	8727885	67.1	-	.	ID=tRNA_0015; Type=Leu; Anti-codon=AAG; structure=">>>>>>>..>>>...........<<<.>>>>>.......<<<<<.>>>>..<<<<..>>>>>.......<<<<<<<<<<<<.";
LG03	tRNAscan-SE	tRNA	8729004	8729084	69.51	-	.	ID=tRNA_0014; Type=Leu; Anti-codon=AAG; structure=">>>>>>>..>>>...........<<<.>>>>>.......<<<<<.>>>...<<<..>>>>>.......<<<<<<<<<<<<.";
LG03	tRNAscan-SE	tRNA	8730343	8730424	69.49	-	.	ID=tRNA_0013; Type=Leu; Anti-codon=AAG; structure=">>>>>>>..>>>...........<<<.>>>>>.......<<<<<.>>>>..<<<<..>>>>>.......<<<<<<<<<<<<.";
LG03	tRNAscan-SE	tRNA	8731684	8731764	69.51	-	.	ID=tRNA_0011; Type=Leu; Anti-codon=AAG; structure=">>>>>>>..>>>...........<<<.>>>>>.......<<<<<.>>>...<<<..>>>>>.......<<<<<<<<<<<<.";
LG03	tRNAscan-SE	tRNA	8733024	8733105	69.49	-	.	ID=tRNA_0010; Type=Leu; Anti-codon=AAG; structure=">>>>>>>..>>>...........<<<.>>>>>.......<<<<<.>>>>..<<<<..>>>>>.......<<<<<<<<<<<<.";
LG03	tRNAscan-SE	tRNA	8734224	8734305	69.49	-	.	ID=tRNA_0009; Type=Leu; Anti-codon=AAG; structure=">>>>>>>..>>>...........<<<.>>>>>.......<<<<<.>>>>..<<<<..>>>>>.......<<<<<<<<<<<<.";
LG03	tRNAscan-SE	tRNA	8735566	8735647	69.49	-	.	ID=tRNA_0008; Type=Leu; Anti-codon=AAG; structure=">>>>>>>..>>>...........<<<.>>>>>.......<<<<<.>>>>..<<<<..>>>>>.......<<<<<<<<<<<<.";
LG03	tRNAscan-SE	tRNA	8736383	8736463	69.51	-	.	ID=tRNA_0007; Type=Leu; Anti-codon=AAG; structure=">>>>>>>..>>>...........<<<.>>>>>.......<<<<<.>>>...<<<..>>>>>.......<<<<<<<<<<<<.";
LG03	tRNAscan-SE	tRNA	8737580	8737661	69.49	-	.	ID=tRNA_0006; Type=Leu; Anti-codon=AAG; structure=">>>>>>>..>>>...........<<<.>>>>>.......<<<<<.>>>>..<<<<..>>>>>.......<<<<<<<<<<<<.";
LG03	tRNAscan-SE	tRNA	8738772	8738853	69.49	-	.	ID=tRNA_0005; Type=Leu; Anti-codon=AAG; structure=">>>>>>>..>>>...........<<<.>>>>>.......<<<<<.>>>>..<<<<..>>>>>.......<<<<<<<<<<<<.";
LG03	tRNAscan-SE	tRNA	8740120	8740201	67.75	-	.	ID=tRNA_0004; Type=Leu; Anti-codon=AAG; structure=">>>>>>>..>>>...........<<<.>>>>>.......<<<<<.>>>>..<<<<..>>>>>.......<<<<<<<<<<<<.";
LG03	tRNAscan-SE	tRNA	9755127	9755199	74.91	+	.	ID=tRNA_0022; Type=Met; Anti-codon=CAT; structure=">>>>>>>..>>>>........<<<<.>>>>.........<<<<.....>>>>>.......<<<<<<<<<<<<.";
LG03	tRNAscan-SE	tRNA	9755977	9756049	74.91	+	.	ID=tRNA_0023; Type=Met; Anti-codon=CAT; structure=">>>>>>>..>>>>........<<<<.>>>>.........<<<<.....>>>>>.......<<<<<<<<<<<<.";
LG03	tRNAscan-SE	tRNA	9756941	9757013	74.91	+	.	ID=tRNA_0024; Type=Met; Anti-codon=CAT; structure=">>>>>>>..>>>>........<<<<.>>>>.........<<<<.....>>>>>.......<<<<<<<<<<<<.";
LG03	tRNAscan-SE	tRNA	10803536	10803607	65.81	-	.	ID=tRNA_0003; Type=Glu; Anti-codon=TTC; structure=">>>>>>>..>.>>........<<.<.>>>>>.......<<<<<....>.>>>.......<<<.<<<<<<<<.";
LG03	tRNAscan-SE	tRNA	11146908	11146979	44.03	-	.	ID=tRNA_0002; Type=Glu; Anti-codon=TTC; structure=">>>>>>>..>>>>........<<<<..>>>>.......<<<<.....>>>.>.......<.<<<<<<<<<<.";
LG03	tRNAscan-SE	tRNA	12773256	12773330	27.53	-	.	ID=tRNA_0028; Type=Pseudo; Anti-codon=CCC; structure=">>..>.>..>>............<<.>>>...........<<<.....>>>>>.......<<<..<<<.<..<<.";
LG03	tRNAscan-SE	tRNA	13832489	13832561	68.89	+	.	ID=tRNA_0025; Type=Arg; Anti-codon=CCT; structure=">>>>>>>..>>>>........<<<<.>>>>>.......<<<<<.....>>>>>.......<<<<<<<<<<<<.";
LG03	tRNAscan-SE	tRNA	14049852	14049933	88.64	-	.	ID=tRNA_0027; Type=Ser; Anti-codon=CGA; structure=">>>>>>>..>>>..........<<<.>>>>>.......<<<<<..>>>...<<<...>>>>>.......<<<<<<<<<<<<.";
LG03	tRNAscan-SE	tRNA	14075680	14075753	80.66	-	.	ID=tRNA_0026; Type=Ile; Anti-codon=AAT; structure=">>>>.>>..>>>>.........<<<<.>>>>>.......<<<<<.....>>>>>.......<<<<<<<.<<<<.";
LG03	tRNAscan-SE	tRNA	16178310	16178381	75.92	+	.	ID=tRNA_0107; Type=Pro; Anti-codon=AGG; structure=">>>>>>>..>>>.........<<<.>>>>>.......<<<<<.....>>>>>.......<<<<<<<<<<<<.";
LG03	tRNAscan-SE	tRNA	19348975	19349049	37.22	+	.	ID=tRNA_0113; Type=Pseudo; Anti-codon=CCC; structure=">>..>.>..>>>..........<<<.>>>...........<<<.....>>>>>.......<<<..<<<.<..<<.";
LG03	tRNAscan-SE	tRNA	19887943	19888015	58.35	-	.	ID=tRNA_0112; Type=Arg; Anti-codon=TCG; structure=">>>>>>>..>>>>........<<<<.>>>>>.......<<<<<.....>>>>>.......<<<<<<<<<<<<.";
LG03	tRNAscan-SE	tRNA	19888148	19888220	59.51	-	.	ID=tRNA_0111; Type=Arg; Anti-codon=TCG; structure=">>>>>>>..>>>>........<<<<.>>>>>.......<<<<<.....>>>>>.......<<<<<<<<<<<<.";
LG03	tRNAscan-SE	tRNA	20082743	20082815	70.63	-	.	ID=tRNA_0110; Type=Arg; Anti-codon=CCT; structure=">>>>>>>..>>>>........<<<<.>>>>>.......<<<<<.....>>>>>.......<<<<<<<<<<<<.";
LG03	tRNAscan-SE	tRNA	20659773	20659845	65.49	+	.	ID=tRNA_0114; Type=Arg; Anti-codon=CCG; structure=">>>>>>>..>>>>........<<<<.>>>>>.......<<<<<.....>>>>>.......<<<<<<<<<<<<.";
LG03	tRNAscan-SE	tRNA	20716817	20716898	88.95	+	.	ID=tRNA_0115; Type=Ser; Anti-codon=AGA; structure=">>>>>>>..>>>..........<<<.>>>>>.......<<<<<.>>>>...<<<<..>>>>>.......<<<<<<<<<<<<.";
LG03	tRNAscan-SE	tRNA	20864771	20864845	30.94	+	.	ID=tRNA_0116; Type=Pseudo; Anti-codon=CCC; structure=">>..>.>..>>............<<.>>>...........<<<.....>>>>>.......<<<..<<<.<..<<.";
LG03	tRNAscan-SE	tRNA	26585635	26585708	20.64	+	.	ID=tRNA_0117; Type=Pseudo; Anti-codon=ACC; structure=">>>.>>....>>>>.......<<<<...>>>.........<<<......>...>.......<...<.<<.<<<.";
LG03	tRNAscan-SE	tRNA	26592112	26592184	24.91	+	.	ID=tRNA_0118; Type=Pseudo; Anti-codon=AGT; structure="..>>>....>>>>........<<<<..>>>.........<<<......>>.>>.......<<.<<..<<<...";
LG03	tRNAscan-SE	tRNA	27333602	27333674	25.31	-	.	ID=tRNA_0109; Type=Pseudo; Anti-codon=ACC; structure=">>>>..>..>>>>.......<<<<...>>>.........<<<........>.>.......<.<..<..<<<<.";
LG03	tRNAscan-SE	tRNA	28045062	28045133	73.65	-	.	ID=tRNA_0108; Type=Gln; Anti-codon=CTG; structure=">>>>>>>..>>>>........<<<<.>>>>>.......<<<<<....>>>>>.......<<<<<<<<<<<<.";
LG03	tRNAscan-SE	tRNA	28045405	28045478	80.66	-	.	ID=tRNA_0120; Type=Ile; Anti-codon=AAT; structure=">>>>.>>..>>>>.........<<<<.>>>>>.......<<<<<.....>>>>>.......<<<<<<<.<<<<.";
LG03	tRNAscan-SE	tRNA	31359810	31359901	70.75	-	.	ID=tRNA_0119; Type=Arg; Anti-codon=TCT; structure=">>>>>>>..>>>>........<<<<.>>>>>..........................<<<<<.....>>>>>.......<<<<<<<<<<<<.";
LG03	tRNAscan-SE	tRNA	34525605	34525674	20.13	-	.	ID=tRNA_0013; Type=Pseudo; Anti-codon=ACC; structure=".>>>>..>>>>.......<<<<...>>>.........<<<......>.>>>.......<<<.<.<<<<..";
LG03	tRNAscan-SE	tRNA	34761562	34761633	60.18	+	.	ID=tRNA_0012; Type=Met; Anti-codon=CAT; structure=">>>>>>>..>>>>.......<<<<.>>>>>.......<<<<<.....>>>>>.......<<<<<<<<<<<<.";
LG04	tRNAscan-SE	tRNA	166687	166759	25.65	+	.	ID=tRNA_0130; Type=Pseudo; Anti-codon=ACC; structure=">.>>..>..>>>>.......<<<<...>>>.........<<<......>.>>>.......<<<.<<..<<.<.";
LG04	tRNAscan-SE	tRNA	281796	281868	23.1	-	.	ID=tRNA_0129; Type=Pseudo; Anti-codon=ACC; structure=">.>>..>..>>>>.......<<<<...>>>.........<.<<.....>.>>.........<<.<<..<<.<.";
LG04	tRNAscan-SE	tRNA	288473	288544	35.45	+	.	ID=tRNA_0131; Type=Pseudo; Anti-codon=TCT; structure=">>>>>>>..>>.>........<.<<.>>.>>.......<<.<<.....>>.>.......<.<<.<<<<<<<.";
LG04	tRNAscan-SE	tRNA	584641	584711	22.99	-	.	ID=tRNA_0128; Type=Pseudo; Anti-codon=ACC; structure=">.>>..>...>>>.......<<<..>>>.........<<<......>.>>>.......<<<.<<..<<.<.";
LG04	tRNAscan-SE	tRNA	1340046	1340115	22.08	+	.	ID=tRNA_0132; Type=Pseudo; Anti-codon=???; structure=">.>>..>..>>>>.......<<<<..>.........<........>.>.>.......<.<.<<..<<.<.";
LG04	tRNAscan-SE	tRNA	1456332	1456404	20.75	+	.	ID=tRNA_0133; Type=Pseudo; Anti-codon=???; structure=">>.>>....>>>>........<<<<...>...........<........>.>>.......<<.<...<<.<<.";
LG04	tRNAscan-SE	tRNA	1755482	1755554	23.65	+	.	ID=tRNA_0134; Type=Pseudo; Anti-codon=ACC; structure=">.>>.>>..>>>>.......<<<<...>>>.........<<<......>..>.........<..<<<.<<.<.";
LG04	tRNAscan-SE	tRNA	3511941	3512012	28.17	+	.	ID=tRNA_0121; Type=Pseudo; Anti-codon=TGT; structure=">>..>>>>...>>>.......<<<...>>>>.......<<<<.......>.>>.......<<.<.<<<<<<.";
LG04	tRNAscan-SE	tRNA	5555124	5555195	68.98	+	.	ID=tRNA_0122; Type=Met; Anti-codon=CAT; structure=">>>>>>>..>>>>.......<<<<.>>>>>.......<<<<<.....>>>>>.......<<<<<<<<<<<<.";
LG04	tRNAscan-SE	tRNA	6643414	6643487	84.06	-	.	ID=tRNA_0120; Type=Thr; Anti-codon=AGT; structure=">>>>>>>..>>>>.........<<<<.>>>>>.......<<<<<.....>>>>>.......<<<<<<<<<<<<.";
LG04	tRNAscan-SE	tRNA	8350419	8350505	77.99	-	.	ID=tRNA_0119; Type=Tyr; Anti-codon=GTA; structure=">>>>>>>..>>>>........<<<<.>>>>>.....................<<<<<.....>>>>>.......<<<<<<<<<<<<.";
LG04	tRNAscan-SE	tRNA	11088586	11088657	72.91	+	.	ID=tRNA_0123; Type=Gln; Anti-codon=CTG; structure=">>>>>>>..>>>>........<<<<.>>>>>.......<<<<<....>>>>>.......<<<<<<<<<<<<.";
LG04	tRNAscan-SE	tRNA	12257814	12257885	66.12	+	.	ID=tRNA_0124; Type=His; Anti-codon=GTG; structure=">>>>>>>..>>>>........<<<<.>>>>>.......<<<<<....>>>>>.......<<<<<<<<<<<<.";
LG04	tRNAscan-SE	tRNA	14703188	14703260	26.12	-	.	ID=tRNA_0139; Type=Pseudo; Anti-codon=CAT; structure="..>>>>>...>.>........<.<..>>.>.........<.<<.....>>>>>.......<<<<<<<<<<...";
LG04	tRNAscan-SE	tRNA	16496260	16496332	68.07	-	.	ID=tRNA_0138; Type=Arg; Anti-codon=ACG; structure=">>>>>>>..>>>..........<<<.>>>>>.......<<<<<.....>>>>>.......<<<<<<<<<<<<.";
LG04	tRNAscan-SE	tRNA	16516482	16516554	68.07	+	.	ID=tRNA_0125; Type=Arg; Anti-codon=ACG; structure=">>>>>>>..>>>..........<<<.>>>>>.......<<<<<.....>>>>>.......<<<<<<<<<<<<.";
LG04	tRNAscan-SE	tRNA	16536655	16536727	76.93	+	.	ID=tRNA_0126; Type=Arg; Anti-codon=TCG; structure=">>>>>>>..>>>>........<<<<.>>>>>.......<<<<<.....>>>>>.......<<<<<<<<<<<<.";
LG04	tRNAscan-SE	tRNA	18802612	18802682	56.54	-	.	ID=tRNA_0137; Type=Gly; Anti-codon=GCC; structure=">>>>>>>..>>>>.......<<<<.>>.>>.......<<.<<....>>>>>.......<<<<<<<<<<<<.";
LG04	tRNAscan-SE	tRNA	21891736	21891818	75.9	-	.	ID=tRNA_0136; Type=Leu; Anti-codon=CAG; structure=">>>>>>>..>>>...........<<<.>>>>>.......<<<<<.>>>>...<<<<..>>>>>.......<<<<<<<<<<<<.";
LG04	tRNAscan-SE	tRNA	21893575	21893657	73.38	-	.	ID=tRNA_0135; Type=Leu; Anti-codon=CAG; structure=">>>>>>>..>>>...........<<<.>>>>>.......<<<<<.>>>>...<<<<..>>>>>.......<<<<<<<<<<<<.";
LG04	tRNAscan-SE	tRNA	21896239	21896321	75.9	-	.	ID=tRNA_0134; Type=Leu; Anti-codon=CAG; structure=">>>>>>>..>>>...........<<<.>>>>>.......<<<<<.>>>>...<<<<..>>>>>.......<<<<<<<<<<<<.";
LG04	tRNAscan-SE	tRNA	21898054	21898134	70.94	-	.	ID=tRNA_0133; Type=Leu; Anti-codon=CAG; structure=">>>>>>>..>>>...........<<<.>>>>>.......<<<<<.>>>>.<<<<..>>>>>.......<<<<<<<<<<<<.";
LG04	tRNAscan-SE	tRNA	21900160	21900242	75.9	+	.	ID=tRNA_0127; Type=Leu; Anti-codon=CAG; structure=">>>>>>>..>>>...........<<<.>>>>>.......<<<<<.>>>>...<<<<..>>>>>.......<<<<<<<<<<<<.";
LG04	tRNAscan-SE	tRNA	22430095	22430166	57.73	-	.	ID=tRNA_0129; Type=Pro; Anti-codon=AGG; structure=">>>>>>>...>>.........<<..>>>>>.......<<<<<.....>>>>>.......<<<<<<<<<<<<.";
LG04	tRNAscan-SE	tRNA	22817778	22817849	76.15	+	.	ID=tRNA_0128; Type=Pro; Anti-codon=TGG; structure=">>>>>>>..>>>.........<<<.>>>>>.......<<<<<.....>>>>>.......<<<<<<<<<<<<.";
LG04	tRNAscan-SE	tRNA	22819259	22819330	75.92	+	.	ID=tRNA_0130; Type=Pro; Anti-codon=AGG; structure=">>>>>>>..>>>.........<<<.>>>>>.......<<<<<.....>>>>>.......<<<<<<<<<<<<.";
LG04	tRNAscan-SE	tRNA	22824577	22824648	75.92	+	.	ID=tRNA_0131; Type=Pro; Anti-codon=AGG; structure=">>>>>>>..>>>.........<<<.>>>>>.......<<<<<.....>>>>>.......<<<<<<<<<<<<.";
LG04	tRNAscan-SE	tRNA	22825212	22825283	32.51	+	.	ID=tRNA_0132; Type=Pro; Anti-codon=TGG; structure=">..>>>>..>>>.........<<<.>>>>>.......<<<<<......>>>>.......<<<<.<<<<..<.";
LG04	tRNAscan-SE	tRNA	23284080	23284151	60.51	-	.	ID=tRNA_0118; Type=Pro; Anti-codon=CGG; structure=">>>>>>>..>>>.........<<<.>>>.>.......<.<<<.....>.>>>.......<<<.<<<<<<<<.";
LG04	tRNAscan-SE	tRNA	25559229	25559298	60.44	+	.	ID=tRNA_0112; Type=Gly; Anti-codon=GCC; structure=">>>>>>>..>>>>.......<<<<.>>>>>.......<<<<<...>>>>>.......<<<<<<<<<<<<.";
LG04	tRNAscan-SE	tRNA	25560948	25561018	71.81	+	.	ID=tRNA_0136; Type=Gly; Anti-codon=GCC; structure=">>>>>>>..>>>>.......<<<<.>>>>>.......<<<<<....>>>>>.......<<<<<<<<<<<<.";
LG04	tRNAscan-SE	tRNA	26771917	26771995	21.39	-	.	ID=tRNA_0135; Type=Pseudo; Anti-codon=ACC; structure=">>..>>>..>>>>.......<<<<...>>>.........<<<......>>>>>.......<<<<<......<<<..<<.";
LG04	tRNAscan-SE	tRNA	28986774	28986856	22.66	-	.	ID=tRNA_0100; Type=Pseudo; Anti-codon=CCC; structure=">>..>.>..>>............<<.>>>...........<<<...>>><<<....>>>>>.......<<<..<<<.<..<<.";
LG04	tRNAscan-SE	tRNA	29578807	29578882	24.49	+	.	ID=tRNA_0101; Type=Pseudo; Anti-codon=ACC; structure=">>>>.>>.....>>>>.......<<<<...>>>.........<<<......>.>>>.......<<<.<<<.<<<<.";
LG04	tRNAscan-SE	tRNA	30839570	30839640	81.62	+	.	ID=tRNA_0102; Type=Gly; Anti-codon=GCC; structure=">>>>>>>..>>>>.......<<<<.>>>>>.......<<<<<....>>>>>.......<<<<<<<<<<<<.";
LG04	tRNAscan-SE	tRNA	32506403	32506477	34.86	-	.	ID=tRNA_0099; Type=Pseudo; Anti-codon=CCC; structure=">>..>.>..>>............<<.>>>...........<<<.....>>>>>.......<<<..<<<.<..<<.";
LG04	tRNAscan-SE	tRNA	32516836	32516912	21.1	-	.	ID=tRNA_0098; Type=Pseudo; Anti-codon=ACC; structure=">>>>.>>.....>>>>.......<<<<...>>>.........<<<......>.>>>.......<<<.<.<<.<<<<.";
LG04	tRNAscan-SE	tRNA	32699128	32699199	68.98	+	.	ID=tRNA_0103; Type=Met; Anti-codon=CAT; structure=">>>>>>>..>>>>.......<<<<.>>>>>.......<<<<<.....>>>>>.......<<<<<<<<<<<<.";
LG04	tRNAscan-SE	tRNA	32866048	32866119	32.41	-	.	ID=tRNA_0097; Type=Pseudo; Anti-codon=TTC; structure=">>>.>>...>>>..........<<<.>>>>>.......<<<<<....>.>>>.......<<<.<.<<.<<<.";
LG04	tRNAscan-SE	tRNA	32866921	32866986	32.78	-	.	ID=tRNA_0096; Type=Glu; Anti-codon=TTC; structure=">>..>..>>>>........<<<<.>>>>>.......<<<<<....>>>>>.......<<<<<<<<.";
LG05	tRNAscan-SE	tRNA	423884	423960	30.93	+	.	ID=tRNA_0002; Type=Pseudo; Anti-codon=GCT; structure=">.>>..>>>..........<<<.>>>>>.......<<<<<.>>>>...<<<<..>>>>>.......<<<<<<<..<.";
LG05	tRNAscan-SE	tRNA	976334	976411	22.75	+	.	ID=tRNA_0003; Type=Ala; Anti-codon=AGC; structure=">>>>>>>..>>.>........<.<<.>>>.>.............<.<<<.....>.>>........<<.<<<<<<<<.";
LG05	tRNAscan-SE	tRNA	1097225	1097297	60.36	+	.	ID=tRNA_0004; Type=Ala; Anti-codon=AGC; structure=">>>>>>>..>>>>........<<<<.>>>>>.......<<<<<.....>>>>>.......<<<<<<<<<<<<.";
LG05	tRNAscan-SE	tRNA	1098238	1098319	85.34	-	.	ID=tRNA_0001; Type=Ser; Anti-codon=GCT; structure=">>>>>>>..>>>..........<<<.>>>>>.......<<<<<.>>>>...<<<<..>>>>>.......<<<<<<<<<<<<.";
LG05	tRNAscan-SE	tRNA	1098458	1098527	44.29	+	.	ID=tRNA_0005; Type=Ala; Anti-codon=AGC; structure=">>>>>>..>>>>........<<<<.>>>>>.......<<<<<.....>>>>>.......<<<<<<<<<<<";
LG05	tRNAscan-SE	tRNA	1848582	1848653	71.88	+	.	ID=tRNA_0121; Type=Cys; Anti-codon=GCA; structure=">>>>>>>..>>>>.......<<<<.>>>>>.......<<<<<.....>>>>>.......<<<<<<<<<<<<.";
LG05	tRNAscan-SE	tRNA	1849781	1849852	63.84	+	.	ID=tRNA_0132; Type=Cys; Anti-codon=GCA; structure=">>>>>>>..>>>>.......<<<<.>>>>>.......<<<<<.....>>>>>.......<<<<<<<<<<<<.";
LG05	tRNAscan-SE	tRNA	1851062	1851133	72.06	+	.	ID=tRNA_0143; Type=Cys; Anti-codon=GCA; structure=">>>>>>>..>>>>.......<<<<.>>>>>.......<<<<<.....>>>>>.......<<<<<<<<<<<<.";
LG05	tRNAscan-SE	tRNA	1851985	1852056	74.23	+	.	ID=tRNA_0154; Type=Cys; Anti-codon=GCA; structure=">>>>>>>..>>>>.......<<<<.>>>>>.......<<<<<.....>>>>>.......<<<<<<<<<<<<.";
LG05	tRNAscan-SE	tRNA	1852175	1852246	72.52	+	.	ID=tRNA_0156; Type=Cys; Anti-codon=GCA; structure=">>>>>>>..>>>>.......<<<<.>>>>>.......<<<<<.....>>>>>.......<<<<<<<<<<<<.";
LG05	tRNAscan-SE	tRNA	1852974	1853045	74.23	+	.	ID=tRNA_0157; Type=Cys; Anti-codon=GCA; structure=">>>>>>>..>>>>.......<<<<.>>>>>.......<<<<<.....>>>>>.......<<<<<<<<<<<<.";
LG05	tRNAscan-SE	tRNA	1853164	1853235	72.52	+	.	ID=tRNA_0158; Type=Cys; Anti-codon=GCA; structure=">>>>>>>..>>>>.......<<<<.>>>>>.......<<<<<.....>>>>>.......<<<<<<<<<<<<.";
LG05	tRNAscan-SE	tRNA	1853962	1854031	54.09	+	.	ID=tRNA_0159; Type=Cys; Anti-codon=GCA; structure=">>>>>>>..>>>>.......<<<<.>>>>>.......<<<<<.....>>>>.......<<<<<<<<<<<.";
LG05	tRNAscan-SE	tRNA	1854150	1854221	72.52	+	.	ID=tRNA_0160; Type=Cys; Anti-codon=GCA; structure=">>>>>>>..>>>>.......<<<<.>>>>>.......<<<<<.....>>>>>.......<<<<<<<<<<<<.";
LG05	tRNAscan-SE	tRNA	1854949	1855020	69.47	+	.	ID=tRNA_0122; Type=Cys; Anti-codon=GCA; structure=">>.>>>>..>>>>.......<<<<.>>>>>.......<<<<<.....>>>>>.......<<<<<<<<<.<<.";
LG05	tRNAscan-SE	tRNA	1855139	1855210	72.52	+	.	ID=tRNA_0123; Type=Cys; Anti-codon=GCA; structure=">>>>>>>..>>>>.......<<<<.>>>>>.......<<<<<.....>>>>>.......<<<<<<<<<<<<.";
LG05	tRNAscan-SE	tRNA	1855937	1856008	74.23	+	.	ID=tRNA_0124; Type=Cys; Anti-codon=GCA; structure=">>>>>>>..>>>>.......<<<<.>>>>>.......<<<<<.....>>>>>.......<<<<<<<<<<<<.";
LG05	tRNAscan-SE	tRNA	1856123	1856194	72.04	+	.	ID=tRNA_0125; Type=Cys; Anti-codon=GCA; structure=">>>>>>>..>>>>.......<<<<.>>>>>.......<<<<<.....>>>>>.......<<<<<<<<<<<<.";
LG05	tRNAscan-SE	tRNA	1857515	1857586	72.04	-	.	ID=tRNA_0155; Type=Cys; Anti-codon=GCA; structure=">>>>>>>..>>>>.......<<<<.>>>>>.......<<<<<.....>>>>>.......<<<<<<<<<<<<.";
LG05	tRNAscan-SE	tRNA	1857705	1857776	73.69	-	.	ID=tRNA_0153; Type=Cys; Anti-codon=GCA; structure=">>>>>>>..>>>>.......<<<<.>>>>>.......<<<<<.....>>>>>.......<<<<<<<<<<<<.";
LG05	tRNAscan-SE	tRNA	2332533	2332614	84.6	+	.	ID=tRNA_0126; Type=Ser; Anti-codon=CGA; structure=">>>>>>>..>>>..........<<<.>>>>>.......<<<<<.>>>>...<<<<..>>>>>.......<<<<<<<<<<<<.";
LG05	tRNAscan-SE	tRNA	2892185	2892256	71.94	+	.	ID=tRNA_0127; Type=Cys; Anti-codon=GCA; structure=">>>>>>>..>>>>.......<<<<.>>>>>.......<<<<<.....>>>>>.......<<<<<<<<<<<<.";
LG05	tRNAscan-SE	tRNA	2892988	2893059	71.94	+	.	ID=tRNA_0128; Type=Cys; Anti-codon=GCA; structure=">>>>>>>..>>>>.......<<<<.>>>>>.......<<<<<.....>>>>>.......<<<<<<<<<<<<.";
LG05	tRNAscan-SE	tRNA	2893316	2893397	85.34	+	.	ID=tRNA_0129; Type=Ser; Anti-codon=GCT; structure=">>>>>>>..>>>..........<<<.>>>>>.......<<<<<.>>>>...<<<<..>>>>>.......<<<<<<<<<<<<.";
LG05	tRNAscan-SE	tRNA	2893974	2894045	73.34	+	.	ID=tRNA_0130; Type=Cys; Anti-codon=GCA; structure=">>>>>>>..>>>>.......<<<<.>>>>>.......<<<<<.....>>>>>.......<<<<<<<<<<<<.";
LG05	tRNAscan-SE	tRNA	2895194	2895265	71.94	+	.	ID=tRNA_0131; Type=Cys; Anti-codon=GCA; structure=">>>>>>>..>>>>.......<<<<.>>>>>.......<<<<<.....>>>>>.......<<<<<<<<<<<<.";
LG05	tRNAscan-SE	tRNA	4722303	4722374	76.15	-	.	ID=tRNA_0152; Type=Pro; Anti-codon=TGG; structure=">>>>>>>..>>>.........<<<.>>>>>.......<<<<<.....>>>>>.......<<<<<<<<<<<<.";
LG05	tRNAscan-SE	tRNA	5454281	5454362	68.1	-	.	ID=tRNA_0151; Type=Leu; Anti-codon=AAG; structure=">>>>>>>..>>>...........<<<.>>>>>.......<<<<<.>>>>><<<<<..>>>>>.......<<<<<<<<<<<<.";
LG05	tRNAscan-SE	tRNA	5591388	5591461	20.08	+	.	ID=tRNA_0133; Type=Pseudo; Anti-codon=???; structure=">>>>>.>...>>..........<<..>.>>>........<<<.<......>>>>.......<<<<.<.<<<<<.";
LG05	tRNAscan-SE	tRNA	5918103	5918184	21.11	+	.	ID=tRNA_0134; Type=Pseudo; Anti-codon=CCC; structure="..>>>>>..>>.>........<.<<.>>>...........<<<...>>><<<.....>>>>.......<<<<..<<<<<...";
LG05	tRNAscan-SE	tRNA	7062472	7062546	21.23	+	.	ID=tRNA_0135; Type=Pseudo; Anti-codon=ACC; structure=">>>.>>.....>>>>.......<<<<...>>>.........<<<......>.>>>.......<<<.<.<<.<<<.";
LG05	tRNAscan-SE	tRNA	8791420	8791490	76.98	+	.	ID=tRNA_0136; Type=Gly; Anti-codon=CCC; structure=">>>>>>>..>>>.........<<<.>>>>>.......<<<<<....>>>>>.......<<<<<<<<<<<<.";
LG05	tRNAscan-SE	tRNA	10182473	10182554	20.47	-	.	ID=tRNA_0150; Type=Pseudo; Anti-codon=CCC; structure=">>..>>>..>>.>........<.<<.>>>...........<<<...>>><<<.....>>>>.......<<<<..<<<..<<.";
LG05	tRNAscan-SE	tRNA	15331493	15331566	80.66	+	.	ID=tRNA_0137; Type=Ile; Anti-codon=AAT; structure=">>>>.>>..>>>>.........<<<<.>>>>>.......<<<<<.....>>>>>.......<<<<<<<.<<<<.";
LG05	tRNAscan-SE	tRNA	15335651	15335724	43.77	+	.	ID=tRNA_0138; Type=Ile; Anti-codon=AAT; structure=">.>>>>>...>.>.........<.<..>>>>>.......<<<<<......>>>>.......<<<<.<<<<<.<.";
LG05	tRNAscan-SE	tRNA	15336645	15336717	84.19	+	.	ID=tRNA_0139; Type=Phe; Anti-codon=GAA; structure=">>>>>>>..>>>>........<<<<.>>>>>.......<<<<<.....>>>>>.......<<<<<<<<<<<<.";
LG05	tRNAscan-SE	tRNA	17366502	17366576	23.28	+	.	ID=tRNA_0140; Type=Pseudo; Anti-codon=GTC; structure=">>.>.>..>.>>........<.<.<.>>>>.........<..<<<.....>>>>>.......<<<<<.<.<.<<.";
LG05	tRNAscan-SE	tRNA	17495817	17495888	72.91	-	.	ID=tRNA_0149; Type=Gln; Anti-codon=CTG; structure=">>>>>>>..>>>>........<<<<.>>>>>.......<<<<<....>>>>>.......<<<<<<<<<<<<.";
LG05	tRNAscan-SE	tRNA	17496594	17496665	73.28	-	.	ID=tRNA_0148; Type=Gln; Anti-codon=TTG; structure=">>>>>>>..>>>>........<<<<.>>>>>.......<<<<<....>>>>>.......<<<<<<<<<<<<.";
LG05	tRNAscan-SE	tRNA	17507176	17507247	72.91	-	.	ID=tRNA_0147; Type=Gln; Anti-codon=CTG; structure=">>>>>>>..>>>>........<<<<.>>>>>.......<<<<<....>>>>>.......<<<<<<<<<<<<.";
LG05	tRNAscan-SE	tRNA	18427115	18427187	83.8	-	.	ID=tRNA_0146; Type=Lys; Anti-codon=TTT; structure=">>>>>>>..>>>>........<<<<.>>>>>.......<<<<<.....>>>>>.......<<<<<<<<<<<<.";
LG05	tRNAscan-SE	tRNA	18430111	18430183	83.8	-	.	ID=tRNA_0145; Type=Lys; Anti-codon=TTT; structure=">>>>>>>..>>>>........<<<<.>>>>>.......<<<<<.....>>>>>.......<<<<<<<<<<<<.";
LG05	tRNAscan-SE	tRNA	27049316	27049398	22.15	-	.	ID=tRNA_0144; Type=Pseudo; Anti-codon=CCC; structure=">>..>.>..>>............<<.>>>...........<<<...>>><<<....>>>>>.......<<<..<<<.<..<<.";
LG05	tRNAscan-SE	tRNA	27539620	27539689	20.8	+	.	ID=tRNA_0141; Type=Pseudo; Anti-codon=???; structure=">.>>..>..>>>>.......<<<<..>.........<........>.>>>.......<<<.<<..<<.<.";
LG05	tRNAscan-SE	tRNA	29134564	29134636	70.63	-	.	ID=tRNA_0142; Type=Arg; Anti-codon=CCT; structure=">>>>>>>..>>>>........<<<<.>>>>>.......<<<<<.....>>>>>.......<<<<<<<<<<<<.";
LG05	tRNAscan-SE	tRNA	30480042	30480114	21.29	+	.	ID=tRNA_0028; Type=Pseudo; Anti-codon=???; structure=">.>>.>>..>>>>.......<<<<.>.>........<.<.........>.>>>.......<<<.<<<.<<.<.";
LG05	tRNAscan-SE	tRNA	31042830	31042904	27.39	-	.	ID=tRNA_0027; Type=Pseudo; Anti-codon=CCC; structure=">>..>.>..>>.>........<.<<.>>>...........<<<.....>>>>>.......<<<..<<<.<..<<.";
LG05	tRNAscan-SE	tRNA	31850366	31850438	25.82	-	.	ID=tRNA_0026; Type=Pseudo; Anti-codon=CCC; structure=">.>>..>..>>>>.......<<<<...>.>.........<.<......>>>>>.......<<<<<<..<<.<.";
LG05	tRNAscan-SE	tRNA	32712073	32712166	26.08	-	.	ID=tRNA_0025; Type=Pseudo; Anti-codon=CAA; structure=">>>>>>>..>>>>.........<<<<....>>...........................<<........>>>>>.......<<<<<<<<<<<<.";
LG06	tRNAscan-SE	tRNA	1446403	1446475	21.35	-	.	ID=tRNA_0017; Type=Pseudo; Anti-codon=ACT; structure=".>.>>.>..>>>>.......<<<<..>.>>.........<<<......>.>>>.......<<<.<<.<<.<..";
LG06	tRNAscan-SE	tRNA	3339262	3339336	30.94	+	.	ID=tRNA_0018; Type=Pseudo; Anti-codon=CCC; structure=">>..>.>..>>............<<.>>>...........<<<.....>>>>>.......<<<..<<<.<..<<.";
LG06	tRNAscan-SE	tRNA	3534387	3534459	78.26	+	.	ID=tRNA_0019; Type=Val; Anti-codon=TAC; structure=">>>>>>>..>>>..........<<<.>>>>>.......<<<<<.....>>>>>.......<<<<<<<<<<<<.";
LG06	tRNAscan-SE	tRNA	4344423	4344494	66.12	-	.	ID=tRNA_0016; Type=His; Anti-codon=GTG; structure=">>>>>>>..>>>>........<<<<.>>>>>.......<<<<<....>>>>>.......<<<<<<<<<<<<.";
LG06	tRNAscan-SE	tRNA	5437704	5437775	66.12	+	.	ID=tRNA_0002; Type=His; Anti-codon=GTG; structure=">>>>>>>..>>>>........<<<<.>>>>>.......<<<<<....>>>>>.......<<<<<<<<<<<<.";
LG06	tRNAscan-SE	tRNA	5443127	5443198	66.12	+	.	ID=tRNA_0003; Type=His; Anti-codon=GTG; structure=">>>>>>>..>>>>........<<<<.>>>>>.......<<<<<....>>>>>.......<<<<<<<<<<<<.";
LG06	tRNAscan-SE	tRNA	6639244	6639315	70.48	+	.	ID=tRNA_0004; Type=Pro; Anti-codon=CGG; structure=">>>>>>>..>>>.........<<<.>>>>>.......<<<<<.....>>>>>.......<<<<<<<<<<<<.";
LG06	tRNAscan-SE	tRNA	6935578	6935650	74.91	+	.	ID=tRNA_0005; Type=Met; Anti-codon=CAT; structure=">>>>>>>..>>>>........<<<<.>>>>.........<<<<.....>>>>>.......<<<<<<<<<<<<.";
LG06	tRNAscan-SE	tRNA	8268665	8268737	66.62	+	.	ID=tRNA_0006; Type=Arg; Anti-codon=ACG; structure=">>>>>>>..>>>..........<<<.>>>>>.......<<<<<.....>>>>>.......<<<<<<<<<<<<.";
LG06	tRNAscan-SE	tRNA	9384406	9384487	88.95	-	.	ID=tRNA_0015; Type=Ser; Anti-codon=AGA; structure=">>>>>>>..>>>..........<<<.>>>>>.......<<<<<.>>>>...<<<<..>>>>>.......<<<<<<<<<<<<.";
LG06	tRNAscan-SE	tRNA	11732691	11732763	20.87	+	.	ID=tRNA_0007; Type=Pseudo; Anti-codon=ACC; structure=">.>>..>..>>>>.......<<<<...>>>.........<<<......>.>>.........<<.<<..<<.<.";
LG06	tRNAscan-SE	tRNA	13080421	13080493	30.37	-	.	ID=tRNA_0014; Type=Pseudo; Anti-codon=ACC; structure=">>>>..>...>>>.......<<<....>>>.........<<<......>.>>>.......<<<.<<..<<<<.";
LG06	tRNAscan-SE	tRNA	14905115	14905197	20.76	-	.	ID=tRNA_0013; Type=Pseudo; Anti-codon=CCC; structure=">>..>.>..>>............<<.>>>...........<<<...>>><<<....>>>>>.......<<<..<<<.<..<<.";
LG06	tRNAscan-SE	tRNA	20323774	20323845	47.66	+	.	ID=tRNA_0008; Type=Glu; Anti-codon=TTC; structure=".>>>>>>..>>>>........<<<<.>>.............<<....>>>>>.......<<<<<<<<<<<..";
LG06	tRNAscan-SE	tRNA	20534828	20534902	27.39	-	.	ID=tRNA_0012; Type=Pseudo; Anti-codon=CCC; structure=">>..>.>..>>.>........<.<<.>>>...........<<<.....>>>>>.......<<<..<<<.<..<<.";
LG06	tRNAscan-SE	tRNA	25755597	25755668	76.52	+	.	ID=tRNA_0009; Type=Pro; Anti-codon=CGG; structure=">>>>>>>..>>>.........<<<.>>>>>.......<<<<<.....>>>>>.......<<<<<<<<<<<<.";
LG06	tRNAscan-SE	tRNA	25756011	25756082	76.15	+	.	ID=tRNA_0010; Type=Pro; Anti-codon=TGG; structure=">>>>>>>..>>>.........<<<.>>>>>.......<<<<<.....>>>>>.......<<<<<<<<<<<<.";
LG06	tRNAscan-SE	tRNA	28456486	28456558	26.99	-	.	ID=tRNA_0001; Type=Pseudo; Anti-codon=ACC; structure=">.>>..>..>>>>.......<<<<...>>>.........<<<......>>>>>.......<<<<<<..<<.<.";
LG06	tRNAscan-SE	tRNA	29027554	29027627	21.1	+	.	ID=tRNA_0011; Type=Pseudo; Anti-codon=ACC; structure=">>>.>>.....>>>>.......<<<<...>>>.........<<<......>>>>.......<<<..<<<.<<<.";
LG06	tRNAscan-SE	tRNA	29863829	29863901	24.04	+	.	ID=tRNA_0030; Type=Pseudo; Anti-codon=ACC; structure=">.>>..>..>.>>.......<<.<...>>>.........<<<......>.>>>.......<<<.<<..<<.<.";
LG06	tRNAscan-SE	tRNA	31527826	31527896	21.51	-	.	ID=tRNA_0029; Type=Pseudo; Anti-codon=TAA; structure=">.>>..>..>>>>.......<<<<...>>>>>.....<<<<<....>.>>>.......<<<.<<..<<.<.";
LG06	tRNAscan-SE	tRNA	32920884	32920952	24.65	+	.	ID=tRNA_0002; Type=Pseudo; Anti-codon=ACC; structure=">>>.>>>..>>>>.......<<<<...>>>.........<<<..........>.......<<<<.<<<.";
LG07	tRNAscan-SE	tRNA	108560	108632	25.8	-	.	ID=tRNA_0007; Type=Pseudo; Anti-codon=ACC; structure=">.>>..>..>>>>.......<<<<...>>>.........<<<......>.>>>.......<<<.<<..<<.<.";
LG07	tRNAscan-SE	tRNA	112631	112703	29.38	-	.	ID=tRNA_0006; Type=Pseudo; Anti-codon=ATC; structure=">>.>>..>..>>>>.......<<<<...>>>.........<.<<.....>.>>>.......<<<.<<<<.<<.";
LG07	tRNAscan-SE	tRNA	148725	148797	23.48	+	.	ID=tRNA_0008; Type=Pseudo; Anti-codon=ACC; structure=">..>..>..>>>>.......<<<<...>>>.........<<<......>.>>>.......<<<.<<..<..<.";
LG07	tRNAscan-SE	tRNA	1313616	1313688	23.82	+	.	ID=tRNA_0003; Type=Pseudo; Anti-codon=ACC; structure=">>>..>>..>>>>.......<<<<...>>>.........<<<......>.>>>.......<<<.<<<..<<<.";
LG07	tRNAscan-SE	tRNA	1631688	1631762	30.94	+	.	ID=tRNA_0152; Type=Pseudo; Anti-codon=ACC; structure=">>>.>>.....>>>>.......<<<<...>>>.........<<<......>.>>>.......<<<.<.<<.<<<.";
LG07	tRNAscan-SE	tRNA	2587687	2587761	27.53	-	.	ID=tRNA_0156; Type=Pseudo; Anti-codon=CCC; structure=">>..>.>..>>............<<.>>>...........<<<.....>>>>>.......<<<..<<<.<..<<.";
LG07	tRNAscan-SE	tRNA	3287932	3288003	28.5	-	.	ID=tRNA_0155; Type=Pseudo; Anti-codon=TGA; structure=">>>>>>>..>.>>........<<.<..>>...........<<.....>>>>.........<<<<<<<<<<<.";
LG07	tRNAscan-SE	tRNA	3848773	3848846	25.31	+	.	ID=tRNA_0153; Type=Pseudo; Anti-codon=CCC; structure="...>>>>..>>............<<.>>>...........<<<......>>>>.......<<<<..<<<<....";
LG07	tRNAscan-SE	tRNA	8256644	8256714	81.62	-	.	ID=tRNA_0154; Type=Gly; Anti-codon=GCC; structure=">>>>>>>..>>>>.......<<<<.>>>>>.......<<<<<....>>>>>.......<<<<<<<<<<<<.";
LG07	tRNAscan-SE	tRNA	9562075	9562147	20.78	-	.	ID=tRNA_0025; Type=Pseudo; Anti-codon=ACC; structure=">.>>..>..>>>.........<<<...>>>.........<<<......>.>>>.......<<<.<<..<<.<.";
LG07	tRNAscan-SE	tRNA	10500073	10500148	25.04	-	.	ID=tRNA_0024; Type=Pseudo; Anti-codon=CCC; structure=">>..>.>..>>.............<<.>>>...........<<<.....>>>>>.......<<<..<<<.<..<<.";
LG07	tRNAscan-SE	tRNA	12703985	12704057	82.97	-	.	ID=tRNA_0022; Type=Val; Anti-codon=AAC; structure=">>>>>>>..>>>..........<<<.>>>>>.......<<<<<.....>>>>>.......<<<<<<<<<<<<.";
LG07	tRNAscan-SE	tRNA	14048535	14048606	71.6	+	.	ID=tRNA_0026; Type=Asp; Anti-codon=GTC; structure=">>>>>>>..>>>>........<<<<.>>>>>.......<<<<<....>>>>>.......<<<<<<<<<<<<.";
LG07	tRNAscan-SE	tRNA	14374548	14374620	74.86	-	.	ID=tRNA_0021; Type=Met; Anti-codon=CAT; structure=">>>>>>>..>>>>........<<<<.>>>>.........<<<<.....>>>>>.......<<<<<<<<<<<<.";
LG07	tRNAscan-SE	tRNA	14375245	14375317	74.86	-	.	ID=tRNA_0020; Type=Met; Anti-codon=CAT; structure=">>>>>>>..>>>>........<<<<.>>>>.........<<<<.....>>>>>.......<<<<<<<<<<<<.";
LG07	tRNAscan-SE	tRNA	14387181	14387254	50.9	+	.	ID=tRNA_0027; Type=Thr; Anti-codon=AGT; structure=">>>>>.>..>>>>.........<<<<.>>>>>.......<<<<<.....>>>>>.......<<<<<<.<<<<<.";
LG07	tRNAscan-SE	tRNA	14910844	14910916	63.06	+	.	ID=tRNA_0028; Type=Ala; Anti-codon=AGC; structure=">>>>>>>..>>>>........<<<<.>>>>>.......<<<<<.....>>>>>.......<<<<<<<<<<<<.";
LG07	tRNAscan-SE	tRNA	14975363	14975435	74.91	+	.	ID=tRNA_0029; Type=Met; Anti-codon=CAT; structure=">>>>>>>..>>>>........<<<<.>>>>.........<<<<.....>>>>>.......<<<<<<<<<<<<.";
LG07	tRNAscan-SE	tRNA	15047239	15047312	65.86	+	.	ID=tRNA_0030; Type=Thr; Anti-codon=AGT; structure=">>>>>.>..>>>>.........<<<<.>>>>.........<<<<.....>>>>>.......<<<<<<.<<<<<.";
LG07	tRNAscan-SE	tRNA	15048349	15048422	74.95	+	.	ID=tRNA_0031; Type=Thr; Anti-codon=AGT; structure=">>>>>>>..>>>>.........<<<<.>>>>>.......<<<<<.....>>>>>.......<<<<<<<<<<<<.";
LG07	tRNAscan-SE	tRNA	15049855	15049927	74.91	-	.	ID=tRNA_0019; Type=Met; Anti-codon=CAT; structure=">>>>>>>..>>>>........<<<<.>>>>.........<<<<.....>>>>>.......<<<<<<<<<<<<.";
LG07	tRNAscan-SE	tRNA	15051169	15051237	34.25	+	.	ID=tRNA_0032; Type=Thr; Anti-codon=AGT; structure=">.>>..>.>>.........<<.<.>>>>.........<<<<.....>>>>>.......<<<<<<.<.<.";
LG07	tRNAscan-SE	tRNA	15053130	15053203	28.5	+	.	ID=tRNA_0033; Type=Pseudo; Anti-codon=TGT; structure=">>.>>....>>>>.........<<<<.>>.>>.......<<.<<.....>>>>>.......<<<<<..<<.<<.";
LG07	tRNAscan-SE	tRNA	18846977	18847062	63.51	+	.	ID=tRNA_0035; Type=SeC(e); Anti-codon=TCA; structure=">>>>>>>.>..>>>>>>....<<<<<<>>>>>>.......<<<<<<.>>>>>....<<<<<.>>>>.......<<<<<.<<<<<<<";
LG07	tRNAscan-SE	tRNA	19015117	19015189	68.45	-	.	ID=tRNA_0018; Type=Lys; Anti-codon=TTT; structure=">>>>.>>..>>>>........<<<<.>>>>>.......<<<<<.....>>>>>.......<<<<<<<.<<<<.";
LG07	tRNAscan-SE	tRNA	20369952	20370030	20.72	-	.	ID=tRNA_0017; Type=Pseudo; Anti-codon=CCC; structure=">>>>.....>>............<<.>>>...........<<<...>>><<<.....>>>>.......<<<<..<<<<.";
LG07	tRNAscan-SE	tRNA	20763183	20763254	75.92	+	.	ID=tRNA_0036; Type=Pro; Anti-codon=AGG; structure=">>>>>>>..>>>.........<<<.>>>>>.......<<<<<.....>>>>>.......<<<<<<<<<<<<.";
LG07	tRNAscan-SE	tRNA	20763537	20763608	76.52	-	.	ID=tRNA_0016; Type=Pro; Anti-codon=CGG; structure=">>>>>>>..>>>.........<<<.>>>>>.......<<<<<.....>>>>>.......<<<<<<<<<<<<.";
LG07	tRNAscan-SE	tRNA	23739986	23740055	20.47	+	.	ID=tRNA_0037; Type=Pseudo; Anti-codon=TTT; structure=">.>>.>>..>.>..........<.<.>>.>.......<.<<......>>>.......<<<..<<.<<.<.";
LG07	tRNAscan-SE	tRNA	25123253	25123327	35.64	+	.	ID=tRNA_0038; Type=Pseudo; Anti-codon=CCC; structure=">>..>.>..>>>..........<<<.>>>...........<<<.....>>>>>.......<<<..<<<.<..<<.";
LG07	tRNAscan-SE	tRNA	25283795	25283867	83.8	-	.	ID=tRNA_0015; Type=Lys; Anti-codon=TTT; structure=">>>>>>>..>>>>........<<<<.>>>>>.......<<<<<.....>>>>>.......<<<<<<<<<<<<.";
LG07	tRNAscan-SE	tRNA	25285126	25285198	83.8	-	.	ID=tRNA_0014; Type=Lys; Anti-codon=TTT; structure=">>>>>>>..>>>>........<<<<.>>>>>.......<<<<<.....>>>>>.......<<<<<<<<<<<<.";
LG07	tRNAscan-SE	tRNA	26751270	26751341	75.92	+	.	ID=tRNA_0039; Type=Pro; Anti-codon=AGG; structure=">>>>>>>..>>>.........<<<.>>>>>.......<<<<<.....>>>>>.......<<<<<<<<<<<<.";
LG07	tRNAscan-SE	tRNA	27385259	27385326	53.4	-	.	ID=tRNA_0013; Type=Lys; Anti-codon=TTT; structure=">>>>>>>..>.........<.>>>>>.......<<<<<.....>>>>>.......<<<<<<<<<<<<.";
LG07	tRNAscan-SE	tRNA	27962228	27962303	22.87	+	.	ID=tRNA_0040; Type=Pseudo; Anti-codon=ACC; structure=">>>>>.>..>>>>.......<<<<...>>>.........<<<......>.>>>.......<<<.<...<.<<<<<.";
LG07	tRNAscan-SE	tRNA	28298811	28298881	32.46	+	.	ID=tRNA_0041; Type=Pseudo; Anti-codon=ATG; structure=">.>>>>>..>>>>.......<<<<..>>>.......<<<........>>>>.......<<<<.<<<<<.<.";
LG07	tRNAscan-SE	tRNA	28733739	28733811	83.31	+	.	ID=tRNA_0042; Type=Lys; Anti-codon=TTT; structure=">>>>>>>..>>>>........<<<<.>>>>>.......<<<<<.....>>>>>.......<<<<<<<<<<<<.";
LG07	tRNAscan-SE	tRNA	28734251	28734323	83.31	-	.	ID=tRNA_0011; Type=Lys; Anti-codon=TTT; structure=">>>>>>>..>>>>........<<<<.>>>>>.......<<<<<.....>>>>>.......<<<<<<<<<<<<.";
LG07	tRNAscan-SE	tRNA	28736830	28736902	83.31	+	.	ID=tRNA_0043; Type=Lys; Anti-codon=TTT; structure=">>>>>>>..>>>>........<<<<.>>>>>.......<<<<<.....>>>>>.......<<<<<<<<<<<<.";
LG07	tRNAscan-SE	tRNA	28737441	28737513	83.31	-	.	ID=tRNA_0010; Type=Lys; Anti-codon=TTT; structure=">>>>>>>..>>>>........<<<<.>>>>>.......<<<<<.....>>>>>.......<<<<<<<<<<<<.";
LG07	tRNAscan-SE	tRNA	29775980	29776071	51.94	-	.	ID=tRNA_0009; Type=Arg; Anti-codon=TCT; structure=">>>>>>>..>>>>........<<<<.>>>>>..........................<<<<<.....>>>>>.......<<<<<<<<<<<<.";
LG07	tRNAscan-SE	tRNA	30312559	30312650	70.23	-	.	ID=tRNA_0008; Type=Arg; Anti-codon=TCT; structure=">>>>>>>..>>>>........<<<<.>>>>>..........................<<<<<.....>>>>>.......<<<<<<<<<<<<.";
LG07	tRNAscan-SE	tRNA	30318343	30318434	68.07	+	.	ID=tRNA_0044; Type=Arg; Anti-codon=TCT; structure=">>>>>>>..>>>>........<<<<.>>>>>..........................<<<<<.....>>>>>.......<<<<<<<<<<<<.";
LG07	tRNAscan-SE	tRNA	30699089	30699180	65.1	-	.	ID=tRNA_0007; Type=Arg; Anti-codon=TCT; structure=">>>>>>>..>>>>........<<<<.>>>>>..........................<<<<<.....>>>>>.......<<<<<<<<<<<<.";
LG07	tRNAscan-SE	tRNA	30703715	30703806	31.24	-	.	ID=tRNA_0006; Type=Arg; Anti-codon=TCT; structure=">.>>>>>..>>.>........<.<<.>>>>>...........................<<<<<....>>>>>.......<<<<<<<<<<.<.";
LG07	tRNAscan-SE	tRNA	30709524	30709615	65.41	-	.	ID=tRNA_0005; Type=Arg; Anti-codon=TCT; structure=">>>>>>>..>>>>........<<<<.>>>>>..........................<<<<<.....>>>>>.......<<<<<<<<<<<<.";
LG07	tRNAscan-SE	tRNA	30710065	30710156	64.14	-	.	ID=tRNA_0004; Type=Arg; Anti-codon=TCT; structure=">>>>>>>..>>>>........<<<<.>>>>>..........................<<<<<.....>>>>>.......<<<<<<<<<<<<.";
LG07	tRNAscan-SE	tRNA	30710607	30710698	64.64	-	.	ID=tRNA_0003; Type=Arg; Anti-codon=TCT; structure=">>>>>>>..>>>>........<<<<.>>>>>..........................<<<<<.....>>>>>.......<<<<<<<<<<<<.";
LG07	tRNAscan-SE	tRNA	30711148	30711239	50.23	-	.	ID=tRNA_0002; Type=Arg; Anti-codon=TCT; structure=">>>>>>>..>>>>........<<<<.>>>>>..........................<<<<<.....>>>>>.......<<<<<<<<<<<<.";
LG07	tRNAscan-SE	tRNA	30711688	30711779	64.14	-	.	ID=tRNA_0054; Type=Arg; Anti-codon=TCT; structure=">>>>>>>..>>>>........<<<<.>>>>>..........................<<<<<.....>>>>>.......<<<<<<<<<<<<.";
LG07	tRNAscan-SE	tRNA	30712229	30712320	56.84	-	.	ID=tRNA_0053; Type=Arg; Anti-codon=TCT; structure=">>>>>>>..>>>>........<<<<.>>>>>..........................<<<<<.....>>>>>.......<<<<<<<<<<<<.";
LG07	tRNAscan-SE	tRNA	30712564	30712655	60.12	-	.	ID=tRNA_0052; Type=Arg; Anti-codon=TCT; structure=">>>>>>>..>>>>........<<<<.>>>>>..........................<<<<<.....>>>>>.......<<<<<<<<<<<<.";
LG07	tRNAscan-SE	tRNA	30717281	30717372	66.67	-	.	ID=tRNA_0051; Type=Arg; Anti-codon=TCT; structure=">>>>>>>..>>>>........<<<<.>>>>>..........................<<<<<.....>>>>>.......<<<<<<<<<<<<.";
LG07	tRNAscan-SE	tRNA	30718302	30718393	66.35	-	.	ID=tRNA_0045; Type=Arg; Anti-codon=TCT; structure=">>>>>>>..>>>>........<<<<.>>>>>..........................<<<<<.....>>>>>.......<<<<<<<<<<<<.";
LG07	tRNAscan-SE	tRNA	30719120	30719211	66.83	-	.	ID=tRNA_0034; Type=Arg; Anti-codon=TCT; structure=">>>>>>>..>>>>........<<<<.>>>>>..........................<<<<<.....>>>>>.......<<<<<<<<<<<<.";
LG07	tRNAscan-SE	tRNA	30719405	30719496	60.33	-	.	ID=tRNA_0023; Type=Arg; Anti-codon=TCT; structure=">>.>>>>..>.>>........<<.<.>>>>>..........................<<<<<.....>>>>>.......<<<<<<<<<.<<.";
LG07	tRNAscan-SE	tRNA	30719753	30719844	58.25	-	.	ID=tRNA_0012; Type=Arg; Anti-codon=TCT; structure=">>>>>>>..>>>>........<<<<.>>>>>..........................<<<<<.....>>>>>.......<<<<<<<<<<<<.";
LG07	tRNAscan-SE	tRNA	30735280	30735371	22.93	+	.	ID=tRNA_0046; Type=Gly; Anti-codon=CCC; structure=".>>.>.>..>>>>........<<<<.>>>>>..........................<<<<<.....>>>>>.......<<<<<<.<.<<..";
LG07	tRNAscan-SE	tRNA	31891139	31891210	76.83	+	.	ID=tRNA_0047; Type=Gly; Anti-codon=TCC; structure=">>>>>>>..>>.>........<.<<.>>>>>.......<<<<<....>>>>>.......<<<<<<<<<<<<.";
LG07	tRNAscan-SE	tRNA	31897804	31897875	73.77	+	.	ID=tRNA_0048; Type=Gln; Anti-codon=TTG; structure=">>>>>>>..>>>>........<<<<.>>>>>.......<<<<<....>>>>>.......<<<<<<<<<<<<.";
LG07	tRNAscan-SE	tRNA	31898333	31898415	77.82	-	.	ID=tRNA_0001; Type=Leu; Anti-codon=CAG; structure=">>>>>>>..>>>...........<<<.>>>>>.......<<<<<.>>>>...<<<<..>>>>>.......<<<<<<<<<<<<.";
LG07	tRNAscan-SE	tRNA	32327898	32327987	68.6	+	.	ID=tRNA_0049; Type=Arg; Anti-codon=TCT; structure=">>>>>>>..>>>>........<<<<.>>>>>........................<<<<<.....>>>>>.......<<<<<<<<<<<<.";
LG07	tRNAscan-SE	tRNA	32388459	32388541	22.66	+	.	ID=tRNA_0050; Type=Pseudo; Anti-codon=CCC; structure=">>..>.>..>>............<<.>>>...........<<<...>>><<<....>>>>>.......<<<..<<<.<..<<.";
LG08	tRNAscan-SE	tRNA	626288	626358	41.79	-	.	ID=tRNA_0024; Type=Gly; Anti-codon=CCC; structure=">>>..>>..>>>.........<<<.>>>>>.......<<<<<....>>>>>.......<<<<<<<..<<<.";
LG08	tRNAscan-SE	tRNA	2716378	2716456	20	-	.	ID=tRNA_0023; Type=Pseudo; Anti-codon=ACT; structure=">>>>.>...>>>>.......<<<<...>>>.........<<<......>>.>>.............<<.<<.<.<<<<.";
LG08	tRNAscan-SE	tRNA	3717833	3717903	54.91	-	.	ID=tRNA_0022; Type=Gly; Anti-codon=GCC; structure=">>>>>>>..>>>>.......<<<<.>>>.>.......<.<<<....>>>>>.......<<<<<<<<<<<<.";
LG08	tRNAscan-SE	tRNA	5183757	5183829	27.83	+	.	ID=tRNA_0021; Type=Pseudo; Anti-codon=ACC; structure=">.>>..>..>>>>.......<<<<...>>>.........<<<......>.>>>.......<<<.<<..<<.<.";
LG08	tRNAscan-SE	tRNA	9239289	9239370	69.84	+	.	ID=tRNA_0139; Type=Leu; Anti-codon=AAG; structure=">>>>>>>..>>>...........<<<.>>>>>.......<<<<<.>>>>..<<<<..>>>>>.......<<<<<<<<<<<<.";
LG08	tRNAscan-SE	tRNA	11325602	11325673	75	-	.	ID=tRNA_0138; Type=Glu; Anti-codon=TTC; structure=">>>>>>>..>>>>........<<<<.>>>>>.......<<<<<....>>>>>.......<<<<<<<<<<<<.";
LG08	tRNAscan-SE	tRNA	11757964	11758036	82.67	+	.	ID=tRNA_0140; Type=Val; Anti-codon=TAC; structure=">>>>>>>..>>>..........<<<.>>>>>.......<<<<<.....>>>>>.......<<<<<<<<<<<<.";
LG08	tRNAscan-SE	tRNA	13138455	13138527	84.19	+	.	ID=tRNA_0028; Type=Phe; Anti-codon=GAA; structure=">>>>>>>..>>>>........<<<<.>>>>>.......<<<<<.....>>>>>.......<<<<<<<<<<<<.";
LG08	tRNAscan-SE	tRNA	13362220	13362291	56.7	+	.	ID=tRNA_0039; Type=Trp; Anti-codon=CCA; structure=">>>>>>>..>>>>.......<<<<.>>>>>.......<<<<<.....>.>>>.......<<<.<<<<<<<<.";
LG08	tRNAscan-SE	tRNA	13362722	13362793	24.72	+	.	ID=tRNA_0050; Type=Pseudo; Anti-codon=CCA; structure=".>>>>.>...>>>.......<<<..>>>.>.......<.<<<.....>>>>>.......<<<<<<.<<<<..";
LG08	tRNAscan-SE	tRNA	13363003	13363074	74.96	+	.	ID=tRNA_0061; Type=Trp; Anti-codon=CCA; structure=">>>>>>>..>>>>.......<<<<.>>>>>.......<<<<<.....>>>>>.......<<<<<<<<<<<<.";
LG08	tRNAscan-SE	tRNA	13363559	13363630	74.96	+	.	ID=tRNA_0069; Type=Trp; Anti-codon=CCA; structure=">>>>>>>..>>>>.......<<<<.>>>>>.......<<<<<.....>>>>>.......<<<<<<<<<<<<.";
LG08	tRNAscan-SE	tRNA	13366192	13366263	74.16	+	.	ID=tRNA_0070; Type=Trp; Anti-codon=CCA; structure=">>>>>>>..>>>>.......<<<<.>>>>>.......<<<<<.....>>>>>.......<<<<<<<<<<<<.";
LG08	tRNAscan-SE	tRNA	14475609	14475681	32.22	-	.	ID=tRNA_0068; Type=Asp; Anti-codon=GTC; structure=">>>>>.>...>>>>........<<<<.>>>>>.......<<<<<....>>>>>.......<<<<<<.<<<<<.";
LG08	tRNAscan-SE	tRNA	14744453	14744524	69.62	+	.	ID=tRNA_0071; Type=Trp; Anti-codon=CCA; structure=">>>>>>>..>>>>.......<<<<.>>>>>.......<<<<<.....>>>>>.......<<<<<<<<<<<<.";
LG08	tRNAscan-SE	tRNA	15137861	15137932	74.16	+	.	ID=tRNA_0072; Type=Trp; Anti-codon=CCA; structure=">>>>>>>..>>>>.......<<<<.>>>>>.......<<<<<.....>>>>>.......<<<<<<<<<<<<.";
LG08	tRNAscan-SE	tRNA	15139211	15139282	72.71	-	.	ID=tRNA_0067; Type=Ala; Anti-codon=TGC; structure=">>>>>>>..>>>>.......<<<<.>>>>>.......<<<<<.....>>>>>.......<<<<<<<<<<<<.";
LG08	tRNAscan-SE	tRNA	15139440	15139511	69.69	+	.	ID=tRNA_0073; Type=Trp; Anti-codon=CCA; structure=">>>>>>>..>>>>.......<<<<.>>>>>.......<<<<<.....>>>>>.......<<<<<<<<<<<<.";
LG08	tRNAscan-SE	tRNA	15141169	15141250	85.32	-	.	ID=tRNA_0066; Type=Ser; Anti-codon=AGA; structure=">>>>>>>..>>>..........<<<.>>>>>.......<<<<<.>>>>...<<<<..>>>>>.......<<<<<<<<<<<<.";
LG08	tRNAscan-SE	tRNA	15141529	15141600	69.69	+	.	ID=tRNA_0029; Type=Trp; Anti-codon=CCA; structure=">>>>>>>..>>>>.......<<<<.>>>>>.......<<<<<.....>>>>>.......<<<<<<<<<<<<.";
LG08	tRNAscan-SE	tRNA	15143255	15143336	85.32	-	.	ID=tRNA_0065; Type=Ser; Anti-codon=AGA; structure=">>>>>>>..>>>..........<<<.>>>>>.......<<<<<.>>>>...<<<<..>>>>>.......<<<<<<<<<<<<.";
LG08	tRNAscan-SE	tRNA	15143615	15143686	69.69	+	.	ID=tRNA_0030; Type=Trp; Anti-codon=CCA; structure=">>>>>>>..>>>>.......<<<<.>>>>>.......<<<<<.....>>>>>.......<<<<<<<<<<<<.";
LG08	tRNAscan-SE	tRNA	15145351	15145433	79.24	-	.	ID=tRNA_0064; Type=Ser; Anti-codon=AGA; structure=">>>>>>>..>>>..........<<<.>>>>>.......<<<<<.>>>>....<<<<..>>>>>.......<<<<<<<<<<<<.";
LG08	tRNAscan-SE	tRNA	15145715	15145786	69.69	+	.	ID=tRNA_0031; Type=Trp; Anti-codon=CCA; structure=">>>>>>>..>>>>.......<<<<.>>>>>.......<<<<<.....>>>>>.......<<<<<<<<<<<<.";
LG08	tRNAscan-SE	tRNA	15147443	15147524	65.42	-	.	ID=tRNA_0063; Type=Ser; Anti-codon=AGA; structure=">>>>>>>..>>>..........<<<.>>>>>.......<<<<<..>>>...<<<.....>>>.......<<<..<<<<<<<.";
LG08	tRNAscan-SE	tRNA	15147801	15147872	69.69	+	.	ID=tRNA_0032; Type=Trp; Anti-codon=CCA; structure=">>>>>>>..>>>>.......<<<<.>>>>>.......<<<<<.....>>>>>.......<<<<<<<<<<<<.";
LG08	tRNAscan-SE	tRNA	15149858	15149938	79.05	-	.	ID=tRNA_0062; Type=Ser; Anti-codon=AGA; structure=">>>>>>>..>>>..........<<<.>>>>>.......<<<<<..>>>...<<<...>>>>.......<<<<.<<<<<<<.";
LG08	tRNAscan-SE	tRNA	15150215	15150286	69.69	+	.	ID=tRNA_0033; Type=Trp; Anti-codon=CCA; structure=">>>>>>>..>>>>.......<<<<.>>>>>.......<<<<<.....>>>>>.......<<<<<<<<<<<<.";
LG08	tRNAscan-SE	tRNA	15152276	15152357	85.32	-	.	ID=tRNA_0060; Type=Ser; Anti-codon=AGA; structure=">>>>>>>..>>>..........<<<.>>>>>.......<<<<<.>>>>...<<<<..>>>>>.......<<<<<<<<<<<<.";
LG08	tRNAscan-SE	tRNA	15152640	15152711	69.69	+	.	ID=tRNA_0034; Type=Trp; Anti-codon=CCA; structure=">>>>>>>..>>>>.......<<<<.>>>>>.......<<<<<.....>>>>>.......<<<<<<<<<<<<.";
LG08	tRNAscan-SE	tRNA	15153312	15153394	59.38	-	.	ID=tRNA_0059; Type=Ser; Anti-codon=AGA; structure=">>>>>>>..>>>..........<<<.>>>>>.......<<<<<..>>>...<<<....>..>>.......<<..<<<<<<<<.";
LG08	tRNAscan-SE	tRNA	15153643	15153714	69.69	+	.	ID=tRNA_0035; Type=Trp; Anti-codon=CCA; structure=">>>>>>>..>>>>.......<<<<.>>>>>.......<<<<<.....>>>>>.......<<<<<<<<<<<<.";
LG08	tRNAscan-SE	tRNA	15155704	15155785	57.52	-	.	ID=tRNA_0058; Type=Ser; Anti-codon=AGA; structure=">>>>>>>..>>>..........<<<.>>>>>.......<<<<<..>>>...<<<.....>>.........<<..<<<<<<<.";
LG08	tRNAscan-SE	tRNA	15156061	15156132	69.69	+	.	ID=tRNA_0036; Type=Trp; Anti-codon=CCA; structure=">>>>>>>..>>>>.......<<<<.>>>>>.......<<<<<.....>>>>>.......<<<<<<<<<<<<.";
LG08	tRNAscan-SE	tRNA	15157041	15157112	72.71	-	.	ID=tRNA_0057; Type=Ala; Anti-codon=TGC; structure=">>>>>>>..>>>>.......<<<<.>>>>>.......<<<<<.....>>>>>.......<<<<<<<<<<<<.";
LG08	tRNAscan-SE	tRNA	15157552	15157634	31.41	-	.	ID=tRNA_0056; Type=SeC; Anti-codon=TCA; structure=">>>>>....>>............<<.>>>>>.......<<<<<.>>>.....<<<..>>>>.........<<<<..<<<<.<.";
LG08	tRNAscan-SE	tRNA	18417414	18417496	22.15	+	.	ID=tRNA_0037; Type=Pseudo; Anti-codon=CCC; structure=">>..>.>..>>............<<.>>>...........<<<...>>><<<....>>>>>.......<<<..<<<.<..<<.";
LG08	tRNAscan-SE	tRNA	21164164	21164246	22.66	+	.	ID=tRNA_0038; Type=Pseudo; Anti-codon=CCC; structure=">>..>.>..>>............<<.>>>...........<<<...>>><<<....>>>>>.......<<<..<<<.<..<<.";
LG08	tRNAscan-SE	tRNA	23469718	23469794	20.62	+	.	ID=tRNA_0040; Type=Pseudo; Anti-codon=ACC; structure=">>>>..>..>>>>.......<<<<...>>>.........<<<......>>.>>...........<<.<<<..<<<<.";
LG08	tRNAscan-SE	tRNA	24064301	24064380	29.15	-	.	ID=tRNA_0055; Type=Leu; Anti-codon=AAG; structure=">.>>>.>>>.............<<.>>>>>.......<<<<<.>>>....<<<..>>>>>.......<<<<<<.<<<.<.";
LG08	tRNAscan-SE	tRNA	24443134	24443215	72.66	-	.	ID=tRNA_0054; Type=Leu; Anti-codon=AAG; structure=">>>>>>>..>>>...........<<<.>>>>>.......<<<<<.>>>....<<<..>>>>>.......<<<<<<<<<<<<.";
LG08	tRNAscan-SE	tRNA	24444072	24444153	71.16	-	.	ID=tRNA_0053; Type=Leu; Anti-codon=TAG; structure=">>>>>>>..>>>...........<<<.>>>>>.......<<<<<.>>>....<<<..>>>>>.......<<<<<<<<<<<<.";
LG08	tRNAscan-SE	tRNA	24445022	24445103	71.16	-	.	ID=tRNA_0052; Type=Leu; Anti-codon=TAG; structure=">>>>>>>..>>>...........<<<.>>>>>.......<<<<<.>>>....<<<..>>>>>.......<<<<<<<<<<<<.";
LG08	tRNAscan-SE	tRNA	24554615	24554697	26.07	-	.	ID=tRNA_0051; Type=Pseudo; Anti-codon=CCC; structure=">>..>.>..>>............<<.>>>...........<<<...>>><<<....>>>>>.......<<<..<<<.<..<<.";
LG08	tRNAscan-SE	tRNA	24692039	24692111	21	+	.	ID=tRNA_0041; Type=Thr; Anti-codon=TGT; structure=">>>>......>>>>........<<<<...>>>.........<<<......>>>>.........<<<<.<<<<.";
LG08	tRNAscan-SE	tRNA	24738258	24738329	29.15	+	.	ID=tRNA_0042; Type=Glu; Anti-codon=TTC; structure=">>>>>>>..>>>>........<<<<.>>>>>.......<<<<<........>.......<....<<<<<<<.";
LG08	tRNAscan-SE	tRNA	24766694	24766775	46.79	+	.	ID=tRNA_0043; Type=Leu; Anti-codon=AAG; structure=">>.>>>>..>>>...........<<<.>>>>.........<<<<.>>>....<<<..>>>>>.......<<<<<<<<<.<<.";
LG08	tRNAscan-SE	tRNA	24968103	24968173	43.93	-	.	ID=tRNA_0049; Type=Glu; Anti-codon=CTC; structure=">>>>>>>..>>>...........<<<.>>>>>.......<<<<<..>>>>>.......<<<<<<<<<<<<.";
LG08	tRNAscan-SE	tRNA	24994622	24994693	43.21	+	.	ID=tRNA_0044; Type=Met; Anti-codon=CAT; structure=">>>>>>>..>.>>.......<<.<.>>>>>.......<<<<<......>>>>.......<<<<.<<<<<<<.";
LG08	tRNAscan-SE	tRNA	25771557	25771638	41.77	+	.	ID=tRNA_0045; Type=Leu; Anti-codon=AAG; structure=">.>>>>>..>>>...........<<<.>>>>>.......<<<<<.>>>....<<<..>>>>>.......<<<<<<<<<<.<.";
LG08	tRNAscan-SE	tRNA	25936483	25936558	47.06	+	.	ID=tRNA_0046; Type=Met; Anti-codon=CAT; structure=">>>>>>>..>>.>...........<.<<.>>>>>.......<<<<<.....>>>>>.......<<<<<<<<<<<<.";
LG08	tRNAscan-SE	tRNA	25937320	25937391	68.98	+	.	ID=tRNA_0047; Type=Met; Anti-codon=CAT; structure=">>>>>>>..>>>>.......<<<<.>>>>>.......<<<<<.....>>>>>.......<<<<<<<<<<<<.";
LG08	tRNAscan-SE	tRNA	25938144	25938215	68.98	+	.	ID=tRNA_0048; Type=Met; Anti-codon=CAT; structure=">>>>>>>..>>>>.......<<<<.>>>>>.......<<<<<.....>>>>>.......<<<<<<<<<<<<.";
LG08	tRNAscan-SE	tRNA	26121512	26121584	66.62	+	.	ID=tRNA_0121; Type=Arg; Anti-codon=ACG; structure=">>>>>>>..>>>..........<<<.>>>>>.......<<<<<.....>>>>>.......<<<<<<<<<<<<.";
LG08	tRNAscan-SE	tRNA	26275933	26276004	55.22	-	.	ID=tRNA_0120; Type=Lys; Anti-codon=CTT; structure=">>>>>>>..>>>>.......<<<<.>>>>>.......<<<<<.....>>>>>.......<<<<<<<<<<<<.";
LG08	tRNAscan-SE	tRNA	27921717	27921788	72.71	+	.	ID=tRNA_0122; Type=Ala; Anti-codon=TGC; structure=">>>>>>>..>>>>.......<<<<.>>>>>.......<<<<<.....>>>>>.......<<<<<<<<<<<<.";
LG08	tRNAscan-SE	tRNA	31299749	31299823	20.92	+	.	ID=tRNA_0137; Type=Pseudo; Anti-codon=ACC; structure=">>>>>..>>>>.......<<<<...>.>.........<.<......>.>>>.......<<<.<......<<<<<.";
LG09	tRNAscan-SE	tRNA	933040	933111	66.32	-	.	ID=tRNA_0118; Type=Glu; Anti-codon=TTC; structure=">>>>>>>..>>>>........<<<<.>>>>>.......<<<<<....>>>>>.......<<<<<<<<<<<<.";
LG09	tRNAscan-SE	tRNA	933246	933317	70.55	+	.	ID=tRNA_0113; Type=Glu; Anti-codon=TTC; structure=">>>>>>>..>>>>........<<<<.>>>>>.......<<<<<....>>>>>.......<<<<<<<<<<<<.";
LG09	tRNAscan-SE	tRNA	935745	935816	70.55	-	.	ID=tRNA_0117; Type=Glu; Anti-codon=TTC; structure=">>>>>>>..>>>>........<<<<.>>>>>.......<<<<<....>>>>>.......<<<<<<<<<<<<.";
LG09	tRNAscan-SE	tRNA	936042	936113	70.55	+	.	ID=tRNA_0114; Type=Glu; Anti-codon=TTC; structure=">>>>>>>..>>>>........<<<<.>>>>>.......<<<<<....>>>>>.......<<<<<<<<<<<<.";
LG09	tRNAscan-SE	tRNA	2138245	2138316	70.09	-	.	ID=tRNA_0116; Type=Thr; Anti-codon=CGT; structure=">>>>>>>..>>>.........<<<.>>>>>.......<<<<<.....>>>>>.......<<<<<<<<<<<<.";
LG09	tRNAscan-SE	tRNA	2153115	2153189	34.39	-	.	ID=tRNA_0115; Type=Pseudo; Anti-codon=CCC; structure=">>..>.>..>>............<<.>>>...........<<<.....>>>>>.......<<<..<<<.<..<<.";
LG09	tRNAscan-SE	tRNA	2406576	2406657	88.95	-	.	ID=tRNA_0009; Type=Ser; Anti-codon=AGA; structure=">>>>>>>..>>>..........<<<.>>>>>.......<<<<<.>>>>...<<<<..>>>>>.......<<<<<<<<<<<<.";
LG09	tRNAscan-SE	tRNA	2461150	2461221	76.52	+	.	ID=tRNA_0008; Type=Pro; Anti-codon=CGG; structure=">>>>>>>..>>>.........<<<.>>>>>.......<<<<<.....>>>>>.......<<<<<<<<<<<<.";
LG09	tRNAscan-SE	tRNA	3215849	3215920	75.92	-	.	ID=tRNA_0007; Type=Pro; Anti-codon=AGG; structure=">>>>>>>..>>>.........<<<.>>>>>.......<<<<<.....>>>>>.......<<<<<<<<<<<<.";
LG09	tRNAscan-SE	tRNA	3216570	3216641	75.92	-	.	ID=tRNA_0006; Type=Pro; Anti-codon=AGG; structure=">>>>>>>..>>>.........<<<.>>>>>.......<<<<<.....>>>>>.......<<<<<<<<<<<<.";
LG09	tRNAscan-SE	tRNA	7406518	7406592	30.94	+	.	ID=tRNA_0001; Type=Pseudo; Anti-codon=CCC; structure=">>..>.>..>>............<<.>>>...........<<<.....>>>>>.......<<<..<<<.<..<<.";
LG09	tRNAscan-SE	tRNA	8419554	8419626	21.85	-	.	ID=tRNA_0005; Type=Pseudo; Anti-codon=ACT; structure=">.>>..>..>>>>.......<<<<...>>>.........<<<......>.>>>.......<<<.<<..<<.<.";
LG09	tRNAscan-SE	tRNA	10034166	10034240	27.4	+	.	ID=tRNA_0008; Type=Pseudo; Anti-codon=CCC; structure=">>>.>..>>..>>............<<.>>>...........<<<......>.>>.......<<.<.<<<.<<<.";
LG09	tRNAscan-SE	tRNA	10267505	10267575	20.99	+	.	ID=tRNA_0009; Type=Pseudo; Anti-codon=ACT; structure=">>>>>>>>>>.......<<<<...>>>.........<<<......>>>>>.......<<.<<<.<<<<<<.";
LG09	tRNAscan-SE	tRNA	11564061	11564133	22	-	.	ID=tRNA_0004; Type=Pseudo; Anti-codon=CCC; structure=">>>>.....>>............<<.>>>...........<<<......>>>>.......<<<<....<<<<.";
LG09	tRNAscan-SE	tRNA	14264394	14264466	82.5	+	.	ID=tRNA_0010; Type=Thr; Anti-codon=TGT; structure=">>>>>>>..>>>>........<<<<.>>>>>.......<<<<<.....>>>>>.......<<<<<<<<<<<<.";
LG09	tRNAscan-SE	tRNA	17161016	17161088	69.22	-	.	ID=tRNA_0003; Type=Arg; Anti-codon=TCG; structure=">>>>>>>..>>>>........<<<<.>>>>>.......<<<<<.....>>>>>.......<<<<<<<<<<<<.";
LG09	tRNAscan-SE	tRNA	17615986	17616058	68.07	-	.	ID=tRNA_0002; Type=Arg; Anti-codon=ACG; structure=">>>>>>>..>>>..........<<<.>>>>>.......<<<<<.....>>>>>.......<<<<<<<<<<<<.";
LG09	tRNAscan-SE	tRNA	17855703	17855775	66.85	+	.	ID=tRNA_0011; Type=Arg; Anti-codon=TCG; structure=">>>>>>>..>>>>........<<<<.>>>>>.......<<<<<.....>>>>>.......<<<<<<<<<<<<.";
LG09	tRNAscan-SE	tRNA	19724519	19724590	76.61	-	.	ID=tRNA_0015; Type=Glu; Anti-codon=CTC; structure=">>>>>>>..>>>>........<<<<.>>>>>.......<<<<<....>>>>>.......<<<<<<<<<<<<.";
LG09	tRNAscan-SE	tRNA	24058811	24058882	69.33	-	.	ID=tRNA_0014; Type=Pro; Anti-codon=CGG; structure=">>>>>>>..>>>.........<<<.>>>>>.......<<<<<.....>>>>>.......<<<<<<<<<<<<.";
LG09	tRNAscan-SE	tRNA	27325898	27325971	25.06	+	.	ID=tRNA_0012; Type=Pseudo; Anti-codon=AGT; structure=">.>>..>..>>>>........<<<<...>>>.........<<<......>>.>>.......<<.<<<..<<.<.";
LG09	tRNAscan-SE	tRNA	28393198	28393280	22.66	+	.	ID=tRNA_0013; Type=Pseudo; Anti-codon=CCC; structure=">>..>.>..>>............<<.>>>...........<<<...>>><<<....>>>>>.......<<<..<<<.<..<<.";
LG09	tRNAscan-SE	tRNA	30725424	30725496	21.83	+	.	ID=tRNA_0124; Type=Pseudo; Anti-codon=ACC; structure=">.>>..>..>>>>.......<<<<..>>>>.........<<<<.......>>>.......<<<..<..<<.<.";
LG09	tRNAscan-SE	tRNA	31314996	31315069	24.36	-	.	ID=tRNA_0125; Type=Pseudo; Anti-codon=ACC; structure=">>>>...>>>>.......<<<<..>>>.........<<<......>>>>>.......<<...<<<....<<<<.";
LG10	tRNAscan-SE	tRNA	888709	888780	50.94	+	.	ID=tRNA_0014; Type=Pseudo; Anti-codon=TCC; structure=".>>>.>>..>>>>........<<<<.>>>>>.......<<<<<.....>>>>.......<<<<.<<.<<<..";
LG10	tRNAscan-SE	tRNA	1633909	1633987	31.13	+	.	ID=tRNA_0015; Type=Ser; Anti-codon=ACT; structure=">>>>>>>..>>>>.......<<<<...>>>.........<<<......>>>>>.......<<<<<......<<<<<<<.";
LG10	tRNAscan-SE	tRNA	3055044	3055114	70.46	+	.	ID=tRNA_0016; Type=Arg; Anti-codon=CCT; structure=">>>>>>>..>>>.........<<<.>>>>>.......<<<<<....>>>>>.......<<<<<<<<<<<<.";
LG10	tRNAscan-SE	tRNA	3055733	3055803	70.33	+	.	ID=tRNA_0017; Type=Gly; Anti-codon=CCC; structure=">>>>>>>..>>>.........<<<.>>>>>.......<<<<<....>>>>>.......<<<<<<<<<<<<.";
LG10	tRNAscan-SE	tRNA	3056373	3056443	70.33	+	.	ID=tRNA_0018; Type=Gly; Anti-codon=CCC; structure=">>>>>>>..>>>.........<<<.>>>>>.......<<<<<....>>>>>.......<<<<<<<<<<<<.";
LG10	tRNAscan-SE	tRNA	6413599	6413681	23.52	-	.	ID=tRNA_0020; Type=Pseudo; Anti-codon=CCC; structure=">>..>.>..>>............<<.>>>...........<<<...>>><<<....>>>>>.......<<<<..<<.<..<<.";
LG10	tRNAscan-SE	tRNA	6784523	6784594	73.77	-	.	ID=tRNA_0019; Type=Gln; Anti-codon=TTG; structure=">>>>>>>..>>>>........<<<<.>>>>>.......<<<<<....>>>>>.......<<<<<<<<<<<<.";
LG10	tRNAscan-SE	tRNA	9171388	9171460	24.78	+	.	ID=tRNA_0195; Type=Pseudo; Anti-codon=ACC; structure=">.>>..>..>>>>.......<<<<...>>>.........<<<......>.>>>.......<<<.<<..<<.<.";
LG10	tRNAscan-SE	tRNA	9898049	9898119	24.03	-	.	ID=tRNA_0251; Type=Pseudo; Anti-codon=CAA; structure=">>>>.>>.....>>>>.......<<<<.>>>.......<<<.....>..>>.......<<..<<<.<<<<.";
LG10	tRNAscan-SE	tRNA	10675051	10675123	20.31	+	.	ID=tRNA_0252; Type=Gly; Anti-codon=ACC; structure=">>>>>>..>>>>.......<<<<...>>>.........<<<......>.>>>.......<<<.<..<<<<<<.";
LG10	tRNAscan-SE	tRNA	11319303	11319375	24.49	+	.	ID=tRNA_0253; Type=Pseudo; Anti-codon=ACT; structure=">.>>..>..>>>>.......<<<<..>>>>.........<<<<.......>>>.......<<<..<..<<.<.";
LG10	tRNAscan-SE	tRNA	12340866	12340937	48.65	-	.	ID=tRNA_0250; Type=Lys; Anti-codon=TTT; structure=">>>>>>>..>>>>........<<<<.>>>>>.......<<<<<....>.>>>.......<<<.<<<<<<<<.";
LG10	tRNAscan-SE	tRNA	12430790	12430861	68.98	+	.	ID=tRNA_0254; Type=Met; Anti-codon=CAT; structure=">>>>>>>..>>>>.......<<<<.>>>>>.......<<<<<.....>>>>>.......<<<<<<<<<<<<.";
LG10	tRNAscan-SE	tRNA	17495987	17496059	84.19	-	.	ID=tRNA_0249; Type=Phe; Anti-codon=GAA; structure=">>>>>>>..>>>>........<<<<.>>>>>.......<<<<<.....>>>>>.......<<<<<<<<<<<<.";
LG10	tRNAscan-SE	tRNA	17498940	17499011	66.12	-	.	ID=tRNA_0248; Type=His; Anti-codon=GTG; structure=">>>>>>>..>>>>........<<<<.>>>>>.......<<<<<....>>>>>.......<<<<<<<<<<<<.";
LG10	tRNAscan-SE	tRNA	17499479	17499550	75	+	.	ID=tRNA_0255; Type=Glu; Anti-codon=TTC; structure=">>>>>>>..>>>>........<<<<.>>>>>.......<<<<<....>>>>>.......<<<<<<<<<<<<.";
LG10	tRNAscan-SE	tRNA	18943573	18943644	72.71	-	.	ID=tRNA_0269; Type=Ala; Anti-codon=TGC; structure=">>>>>>>..>>>>.......<<<<.>>>>>.......<<<<<.....>>>>>.......<<<<<<<<<<<<.";
LG10	tRNAscan-SE	tRNA	22451171	22451243	80.47	-	.	ID=tRNA_0268; Type=Lys; Anti-codon=CTT; structure=">>>>>>>..>>>>........<<<<.>>>>>.......<<<<<.....>>>>>.......<<<<<<<<<<<<.";
LG10	tRNAscan-SE	tRNA	24275493	24275565	25.67	-	.	ID=tRNA_0267; Type=Pseudo; Anti-codon=ACC; structure=">..>..>..>>>>.......<<<<...>>>.........<<<......>.>>>.......<<<.<<..<..<.";
LG10	tRNAscan-SE	tRNA	24878417	24878488	76.61	-	.	ID=tRNA_0266; Type=Glu; Anti-codon=CTC; structure=">>>>>>>..>>>>........<<<<.>>>>>.......<<<<<....>>>>>.......<<<<<<<<<<<<.";
LG10	tRNAscan-SE	tRNA	26331891	26331962	68.98	-	.	ID=tRNA_0265; Type=Met; Anti-codon=CAT; structure=">>>>>>>..>>>>.......<<<<.>>>>>.......<<<<<.....>>>>>.......<<<<<<<<<<<<.";
LG10	tRNAscan-SE	tRNA	26331966	26332038	70.14	-	.	ID=tRNA_0264; Type=Arg; Anti-codon=CCT; structure=">>>>>>>..>>>>........<<<<.>>>>>.......<<<<<.....>>>>>.......<<<<<<<<<<<<.";
LG10	tRNAscan-SE	tRNA	26696701	26696773	70.14	+	.	ID=tRNA_0256; Type=Arg; Anti-codon=CCT; structure=">>>>>>>..>>>>........<<<<.>>>>>.......<<<<<.....>>>>>.......<<<<<<<<<<<<.";
LG10	tRNAscan-SE	tRNA	26696777	26696848	68.98	+	.	ID=tRNA_0257; Type=Met; Anti-codon=CAT; structure=">>>>>>>..>>>>.......<<<<.>>>>>.......<<<<<.....>>>>>.......<<<<<<<<<<<<.";
LG10	tRNAscan-SE	tRNA	26697986	26698058	70.14	+	.	ID=tRNA_0259; Type=Arg; Anti-codon=CCT; structure=">>>>>>>..>>>>........<<<<.>>>>>.......<<<<<.....>>>>>.......<<<<<<<<<<<<.";
LG10	tRNAscan-SE	tRNA	26698062	26698133	68.98	+	.	ID=tRNA_0260; Type=Met; Anti-codon=CAT; structure=">>>>>>>..>>>>.......<<<<.>>>>>.......<<<<<.....>>>>>.......<<<<<<<<<<<<.";
LG10	tRNAscan-SE	tRNA	28009179	28009261	27.89	+	.	ID=tRNA_0261; Type=Pseudo; Anti-codon=CCC; structure=">.>>>.>..>>............<<.>>>...........<<<...>>><<<....>>>>>.......<<<..<<<.<<<.<.";
LG10	tRNAscan-SE	tRNA	28636563	28636635	25.44	-	.	ID=tRNA_0263; Type=Pseudo; Anti-codon=CCC; structure=".>>..>...>>............<<.>>>...........<<<......>>>>.......<<<<..<..<<..";
LG10	tRNAscan-SE	tRNA	28692256	28692327	70.99	-	.	ID=tRNA_0258; Type=Thr; Anti-codon=TGT; structure=">>>>>>>..>>>.........<<<.>>>>>.......<<<<<.....>>>>>.......<<<<<<<<<<<<.";
LG10	tRNAscan-SE	tRNA	29134792	29134863	76.61	-	.	ID=tRNA_0247; Type=Glu; Anti-codon=CTC; structure=">>>>>>>..>>>>........<<<<.>>>>>.......<<<<<....>>>>>.......<<<<<<<<<<<<.";
LG10	tRNAscan-SE	tRNA	29135105	29135186	88.95	+	.	ID=tRNA_0262; Type=Ser; Anti-codon=AGA; structure=">>>>>>>..>>>..........<<<.>>>>>.......<<<<<.>>>>...<<<<..>>>>>.......<<<<<<<<<<<<.";
LG10	tRNAscan-SE	tRNA	29585683	29585754	63.18	-	.	ID=tRNA_0022; Type=Lys; Anti-codon=TTT; structure=">>>>>>>..>>>>........<<<<.>>>>>.......<<<<<.....>>.>>.......<<<<<<<<<<<.";
LG10	tRNAscan-SE	tRNA	29586882	29586952	59.36	-	.	ID=tRNA_0021; Type=Lys; Anti-codon=TTT; structure=">>>>>>>..>>>>........<<<<.>>>>>.......<<<<<....>>.>>.......<<<<<<<<<<<.";
LG10	tRNAscan-SE	tRNA	29588082	29588154	75.55	-	.	ID=tRNA_0020; Type=Lys; Anti-codon=TTT; structure=">>>>>>>..>>>>........<<<<.>>>>>.......<<<<<.....>>>>>.......<<<<<<<<<<<<.";
LG10	tRNAscan-SE	tRNA	29589280	29589350	59.36	-	.	ID=tRNA_0019; Type=Lys; Anti-codon=TTT; structure=">>>>>>>..>>>>........<<<<.>>>>>.......<<<<<....>>.>>.......<<<<<<<<<<<.";
LG10	tRNAscan-SE	tRNA	29590478	29590548	59.36	-	.	ID=tRNA_0018; Type=Lys; Anti-codon=TTT; structure=">>>>>>>..>>>>........<<<<.>>>>>.......<<<<<....>>.>>.......<<<<<<<<<<<.";
LG10	tRNAscan-SE	tRNA	29591677	29591748	63.18	-	.	ID=tRNA_0017; Type=Lys; Anti-codon=TTT; structure=">>>>>>>..>>>>........<<<<.>>>>>.......<<<<<.....>>.>>.......<<<<<<<<<<<.";
LG10	tRNAscan-SE	tRNA	29592877	29592948	63.18	-	.	ID=tRNA_0016; Type=Lys; Anti-codon=TTT; structure=">>>>>>>..>>>>........<<<<.>>>>>.......<<<<<.....>>.>>.......<<<<<<<<<<<.";
LG10	tRNAscan-SE	tRNA	29594077	29594148	72.81	-	.	ID=tRNA_0015; Type=Lys; Anti-codon=TTT; structure=">>>>>>>..>>>>........<<<<.>>>>>.......<<<<<....>>>>>.......<<<<<<<<<<<<.";
LG10	tRNAscan-SE	tRNA	29595275	29595346	72.81	-	.	ID=tRNA_0014; Type=Lys; Anti-codon=TTT; structure=">>>>>>>..>>>>........<<<<.>>>>>.......<<<<<....>>>>>.......<<<<<<<<<<<<.";
LG10	tRNAscan-SE	tRNA	29596477	29596549	76.63	-	.	ID=tRNA_0013; Type=Lys; Anti-codon=TTT; structure=">>>>>>>..>>>>........<<<<.>>>>>.......<<<<<.....>>>>>.......<<<<<<<<<<<<.";
LG10	tRNAscan-SE	tRNA	29597679	29597751	75.55	-	.	ID=tRNA_0011; Type=Lys; Anti-codon=TTT; structure=">>>>>>>..>>>>........<<<<.>>>>>.......<<<<<.....>>>>>.......<<<<<<<<<<<<.";
LG10	tRNAscan-SE	tRNA	29598881	29598953	75.55	-	.	ID=tRNA_0010; Type=Lys; Anti-codon=TTT; structure=">>>>>>>..>>>>........<<<<.>>>>>.......<<<<<.....>>>>>.......<<<<<<<<<<<<.";
LG10	tRNAscan-SE	tRNA	29600084	29600156	75.55	-	.	ID=tRNA_0009; Type=Lys; Anti-codon=TTT; structure=">>>>>>>..>>>>........<<<<.>>>>>.......<<<<<.....>>>>>.......<<<<<<<<<<<<.";
LG10	tRNAscan-SE	tRNA	29601286	29601358	75.55	-	.	ID=tRNA_0008; Type=Lys; Anti-codon=TTT; structure=">>>>>>>..>>>>........<<<<.>>>>>.......<<<<<.....>>>>>.......<<<<<<<<<<<<.";
LG10	tRNAscan-SE	tRNA	29602489	29602561	75.55	-	.	ID=tRNA_0007; Type=Lys; Anti-codon=TTT; structure=">>>>>>>..>>>>........<<<<.>>>>>.......<<<<<.....>>>>>.......<<<<<<<<<<<<.";
LG10	tRNAscan-SE	tRNA	29603691	29603763	75.55	-	.	ID=tRNA_0006; Type=Lys; Anti-codon=TTT; structure=">>>>>>>..>>>>........<<<<.>>>>>.......<<<<<.....>>>>>.......<<<<<<<<<<<<.";
LG10	tRNAscan-SE	tRNA	29604897	29604969	75.55	-	.	ID=tRNA_0005; Type=Lys; Anti-codon=TTT; structure=">>>>>>>..>>>>........<<<<.>>>>>.......<<<<<.....>>>>>.......<<<<<<<<<<<<.";
LG10	tRNAscan-SE	tRNA	29606099	29606171	75.55	-	.	ID=tRNA_0004; Type=Lys; Anti-codon=TTT; structure=">>>>>>>..>>>>........<<<<.>>>>>.......<<<<<.....>>>>>.......<<<<<<<<<<<<.";
LG10	tRNAscan-SE	tRNA	29607299	29607371	75.55	-	.	ID=tRNA_0003; Type=Lys; Anti-codon=TTT; structure=">>>>>>>..>>>>........<<<<.>>>>>.......<<<<<.....>>>>>.......<<<<<<<<<<<<.";
LG10	tRNAscan-SE	tRNA	29608502	29608574	75.55	-	.	ID=tRNA_0002; Type=Lys; Anti-codon=TTT; structure=">>>>>>>..>>>>........<<<<.>>>>>.......<<<<<.....>>>>>.......<<<<<<<<<<<<.";
LG10	tRNAscan-SE	tRNA	29609704	29609776	75.55	-	.	ID=tRNA_0029; Type=Lys; Anti-codon=TTT; structure=">>>>>>>..>>>>........<<<<.>>>>>.......<<<<<.....>>>>>.......<<<<<<<<<<<<.";
LG10	tRNAscan-SE	tRNA	29610907	29610979	75.55	-	.	ID=tRNA_0028; Type=Lys; Anti-codon=TTT; structure=">>>>>>>..>>>>........<<<<.>>>>>.......<<<<<.....>>>>>.......<<<<<<<<<<<<.";
LG10	tRNAscan-SE	tRNA	29612109	29612181	75.55	-	.	ID=tRNA_0027; Type=Lys; Anti-codon=TTT; structure=">>>>>>>..>>>>........<<<<.>>>>>.......<<<<<.....>>>>>.......<<<<<<<<<<<<.";
LG10	tRNAscan-SE	tRNA	29613311	29613383	75.55	-	.	ID=tRNA_0026; Type=Lys; Anti-codon=TTT; structure=">>>>>>>..>>>>........<<<<.>>>>>.......<<<<<.....>>>>>.......<<<<<<<<<<<<.";
LG10	tRNAscan-SE	tRNA	29614512	29614584	75.55	-	.	ID=tRNA_0025; Type=Lys; Anti-codon=TTT; structure=">>>>>>>..>>>>........<<<<.>>>>>.......<<<<<.....>>>>>.......<<<<<<<<<<<<.";
LG10	tRNAscan-SE	tRNA	29615715	29615787	75.55	-	.	ID=tRNA_0024; Type=Lys; Anti-codon=TTT; structure=">>>>>>>..>>>>........<<<<.>>>>>.......<<<<<.....>>>>>.......<<<<<<<<<<<<.";
LG10	tRNAscan-SE	tRNA	29616916	29616988	75.55	-	.	ID=tRNA_0023; Type=Lys; Anti-codon=TTT; structure=">>>>>>>..>>>>........<<<<.>>>>>.......<<<<<.....>>>>>.......<<<<<<<<<<<<.";
LG10	tRNAscan-SE	tRNA	29618119	29618191	75.55	-	.	ID=tRNA_0012; Type=Lys; Anti-codon=TTT; structure=">>>>>>>..>>>>........<<<<.>>>>>.......<<<<<.....>>>>>.......<<<<<<<<<<<<.";
LG10	tRNAscan-SE	tRNA	29619322	29619394	75.55	-	.	ID=tRNA_0001; Type=Lys; Anti-codon=TTT; structure=">>>>>>>..>>>>........<<<<.>>>>>.......<<<<<.....>>>>>.......<<<<<<<<<<<<.";
LG10	tRNAscan-SE	tRNA	30391466	30391541	24.35	-	.	ID=tRNA_0125; Type=Pseudo; Anti-codon=ACC; structure=">>>>..>>..>>>>.......<<<<...>>...........<<......>.>>>.......<<<..<<<..<<<<.";
LG10	tRNAscan-SE	tRNA	30741957	30742027	20.77	+	.	ID=tRNA_0126; Type=Pseudo; Anti-codon=ACT; structure=">...>.>..>>>>.......<<<<..>.>>.........<<.<.....>.>>>.......<<<..<<.<<.";
LG10	tRNAscan-SE	tRNA	30767916	30767998	22.66	-	.	ID=tRNA_0124; Type=Pseudo; Anti-codon=CCC; structure=">>..>.>..>>............<<.>>>...........<<<...>>><<<....>>>>>.......<<<..<<<.<..<<.";
LG11	tRNAscan-SE	tRNA	2425163	2425242	22.5	-	.	ID=tRNA_0210; Type=Ser; Anti-codon=ACT; structure=">>>>>>>.....>>>>.......<<<<...>>>.........<<<......>.>>>.......<<<.<....<<<<<<<.";
LG11	tRNAscan-SE	tRNA	2673494	2673566	31.56	+	.	ID=tRNA_0211; Type=Pseudo; Anti-codon=ACC; structure=">>>..>>..>>>>.......<<<<...>>>.........<<<......>>>.>.......<.<<<<<..<<<.";
LG11	tRNAscan-SE	tRNA	4075691	4075763	22.74	+	.	ID=tRNA_0212; Type=Pseudo; Anti-codon=ACC; structure=">.>>..>..>>>>.......<<<<...>>>.........<.<<.....>>>>>.......<<<<<<..<<.<.";
LG11	tRNAscan-SE	tRNA	5528615	5528699	20.15	+	.	ID=tRNA_0213; Type=Pseudo; Anti-codon=???; structure=">>>>>>>..>>>>........<<<<.........>>>>>......<<<<<.>>>.<<<...>.>>.......<<.<.<<<<<<<.";
LG11	tRNAscan-SE	tRNA	5832681	5832774	69.51	+	.	ID=tRNA_0214; Type=Ile; Anti-codon=TAT; structure=">>>>>>>..>>>>.........<<<<.>>>>>...........................<<<<<.....>>>>>.......<<<<<<<<<<<<.";
LG11	tRNAscan-SE	tRNA	5874545	5874638	68.93	+	.	ID=tRNA_0215; Type=Ile; Anti-codon=TAT; structure=">>>>>>>..>>>>.........<<<<.>>>>>...........................<<<<<.....>>>>>.......<<<<<<<<<<<<.";
LG11	tRNAscan-SE	tRNA	6055430	6055504	23.04	+	.	ID=tRNA_0216; Type=Pseudo; Anti-codon=ACC; structure=">>>.>>.....>>>>.......<<<<...>>>.........<<<......>.>>.........<<.<.<<.<<<.";
LG11	tRNAscan-SE	tRNA	6140326	6140395	24.75	+	.	ID=tRNA_0217; Type=Pseudo; Anti-codon=ACC; structure=">.>.>>>..>>>>.......<<<<...>>>.........<<<.....>.>>>.......<<<<<<<<.<.";
LG11	tRNAscan-SE	tRNA	21073389	21073460	34.64	+	.	ID=tRNA_0219; Type=Asp; Anti-codon=GTC; structure=">>>>>>>..>>>>........<<<<.>.>>>.......<<<.<....>>>>>.......<<<<<<<<<<<<.";
LG11	tRNAscan-SE	tRNA	22046652	22046724	23.85	-	.	ID=tRNA_0209; Type=Pseudo; Anti-codon=CTG; structure=">>..>....>>>>........<<<<.>>>>>.......<<<<<.....>>>>>.......<<<<<..<..<<.";
LG11	tRNAscan-SE	tRNA	22395932	22396025	65.07	-	.	ID=tRNA_0208; Type=Ile; Anti-codon=TAT; structure=">>>>>>>..>>>>.........<<<<.>>>>>...........................<<<<<.....>>>>>.......<<<<<<<<<<<<.";
LG11	tRNAscan-SE	tRNA	22397222	22397315	66.79	+	.	ID=tRNA_0220; Type=Ile; Anti-codon=TAT; structure=">>>>>>>..>>>>.........<<<<.>>>>>...........................<<<<<.....>>>>>.......<<<<<<<<<<<<.";
LG11	tRNAscan-SE	tRNA	22398357	22398451	67.06	+	.	ID=tRNA_0221; Type=Ile; Anti-codon=TAT; structure=">>>>>>>..>>>>.........<<<<.>>>>>............................<<<<<.....>>>>>.......<<<<<<<<<<<<.";
LG11	tRNAscan-SE	tRNA	22399491	22399584	66.79	+	.	ID=tRNA_0222; Type=Ile; Anti-codon=TAT; structure=">>>>>>>..>>>>.........<<<<.>>>>>...........................<<<<<.....>>>>>.......<<<<<<<<<<<<.";
LG11	tRNAscan-SE	tRNA	22400623	22400715	67.44	+	.	ID=tRNA_0223; Type=Ile; Anti-codon=TAT; structure=">>>>>>>..>>>>.........<<<<.>>>>>..........................<<<<<.....>>>>>.......<<<<<<<<<<<<.";
LG11	tRNAscan-SE	tRNA	24288917	24288998	89.02	+	.	ID=tRNA_0224; Type=Ser; Anti-codon=CGA; structure=">>>>>>>..>>>..........<<<.>>>>>.......<<<<<.>>>>...<<<<..>>>>>.......<<<<<<<<<<<<.";
LG11	tRNAscan-SE	tRNA	24471849	24471920	70.9	-	.	ID=tRNA_0246; Type=Gln; Anti-codon=CTG; structure=">>>>>>>..>>>>........<<<<.>>>>>.......<<<<<....>>>>>.......<<<<<<<<<<<<.";
LG11	tRNAscan-SE	tRNA	25565662	25565731	25.78	-	.	ID=tRNA_0245; Type=Pseudo; Anti-codon=AGT; structure=">>.>>....>>>>........<<<<..>>>.........<<<......>>..........<<..<<.<<.";
LG11	tRNAscan-SE	tRNA	27160919	27160990	58.98	-	.	ID=tRNA_0244; Type=Glu; Anti-codon=TTC; structure=">>>>>>>..>>>>........<<<<.>>>.>.......<.<<<.....>>>>.......<<<<.<<<<<<<.";
LG11	tRNAscan-SE	tRNA	27476832	27476904	33.15	+	.	ID=tRNA_0225; Type=Pseudo; Anti-codon=TTT; structure=">.>>>>>..>>>>........<<<<.>>>.>.......<.<<<......>>.>.......<.<<.<<<<<.<.";
LG11	tRNAscan-SE	tRNA	28536028	28536107	20.66	-	.	ID=tRNA_0243; Type=Pseudo; Anti-codon=ACC; structure=">>>>.>>.....>>>>.......<<<<...>>>>.........<<<<........>.>>>.......<<<.<<<.<<<<.";
LG11	tRNAscan-SE	tRNA	28589650	28589722	74.81	+	.	ID=tRNA_0226; Type=Thr; Anti-codon=CGT; structure=">>>>>>>..>>>>........<<<<.>>>>>.......<<<<<.....>>>>>.......<<<<<<<<<<<<.";
LG11	tRNAscan-SE	tRNA	28590423	28590496	76.64	+	.	ID=tRNA_0227; Type=Thr; Anti-codon=CGT; structure=">>>>>>>..>>>>.........<<<<.>>>>>.......<<<<<.....>>>>>.......<<<<<<<<<<<<.";
LG11	tRNAscan-SE	tRNA	28591142	28591214	76.53	+	.	ID=tRNA_0228; Type=Thr; Anti-codon=CGT; structure=">>>>>>>..>>>>........<<<<.>>>>>.......<<<<<.....>>>>>.......<<<<<<<<<<<<.";
LG11	tRNAscan-SE	tRNA	28591913	28591986	76.64	+	.	ID=tRNA_0230; Type=Thr; Anti-codon=CGT; structure=">>>>>>>..>>>>.........<<<<.>>>>>.......<<<<<.....>>>>>.......<<<<<<<<<<<<.";
LG11	tRNAscan-SE	tRNA	28592632	28592704	76.16	+	.	ID=tRNA_0231; Type=Thr; Anti-codon=TGT; structure=">>>>>>>..>>>>........<<<<.>>>>>.......<<<<<.....>>>>>.......<<<<<<<<<<<<.";
LG11	tRNAscan-SE	tRNA	28593388	28593461	74.93	+	.	ID=tRNA_0232; Type=Thr; Anti-codon=CGT; structure=">>>>>>>..>>>>.........<<<<.>>>>>.......<<<<<.....>>>>>.......<<<<<<<<<<<<.";
LG11	tRNAscan-SE	tRNA	28594568	28594641	76.28	+	.	ID=tRNA_0233; Type=Thr; Anti-codon=TGT; structure=">>>>>>>..>>>>.........<<<<.>>>>>.......<<<<<.....>>>>>.......<<<<<<<<<<<<.";
LG11	tRNAscan-SE	tRNA	28594947	28595019	78.49	+	.	ID=tRNA_0234; Type=Thr; Anti-codon=CGT; structure=">>>>>>>..>>>>........<<<<.>>>>>.......<<<<<.....>>>>>.......<<<<<<<<<<<<.";
LG11	tRNAscan-SE	tRNA	28595255	28595328	80.3	-	.	ID=tRNA_0242; Type=Thr; Anti-codon=AGT; structure=">>>>>>>..>>>>.........<<<<.>>>>>.......<<<<<.....>>>>>.......<<<<<<<<<<<<.";
LG11	tRNAscan-SE	tRNA	28596369	28596442	76.45	+	.	ID=tRNA_0235; Type=Thr; Anti-codon=AGT; structure=">>>>>>>..>>>>.........<<<<.>>>>>.......<<<<<.....>>>>>.......<<<<<<<<<<<<.";
LG11	tRNAscan-SE	tRNA	28596810	28596882	80.51	+	.	ID=tRNA_0236; Type=Thr; Anti-codon=CGT; structure=">>>>>>>..>>>>........<<<<.>>>>>.......<<<<<.....>>>>>.......<<<<<<<<<<<<.";
LG11	tRNAscan-SE	tRNA	28597605	28597678	80.02	+	.	ID=tRNA_0237; Type=Thr; Anti-codon=AGT; structure=">>>>>>>..>>>>.........<<<<.>>>>>.......<<<<<.....>>>>>.......<<<<<<<<<<<<.";
LG11	tRNAscan-SE	tRNA	28614045	28614117	75.77	-	.	ID=tRNA_0240; Type=Thr; Anti-codon=CGT; structure=">>>>>>>..>>>>........<<<<.>>>>>.......<<<<<.....>>>>>.......<<<<<<<<<<<<.";
LG11	tRNAscan-SE	tRNA	28614372	28614445	79.23	-	.	ID=tRNA_0229; Type=Thr; Anti-codon=AGT; structure=">>>>>>>..>>>>.........<<<<.>>>>>.......<<<<<.....>>>>>.......<<<<<<<<<<<<.";
LG11	tRNAscan-SE	tRNA	28614980	28615052	74.99	-	.	ID=tRNA_0218; Type=Thr; Anti-codon=CGT; structure=">>>>>>>..>>>>........<<<<.>>>>>.......<<<<<.....>>>>>.......<<<<<<<<<<<<.";
LG11	tRNAscan-SE	tRNA	28615269	28615342	76.32	-	.	ID=tRNA_0207; Type=Thr; Anti-codon=AGT; structure=">>>>>>>..>>>>.........<<<<.>>>>>.......<<<<<.....>>>>>.......<<<<<<<<<<<<.";
LG11	tRNAscan-SE	tRNA	28630408	28630481	81.06	+	.	ID=tRNA_0238; Type=Thr; Anti-codon=AGT; structure=">>>>>>>..>>>>.........<<<<.>>>>>.......<<<<<.....>>>>>.......<<<<<<<<<<<<.";
LG11	tRNAscan-SE	tRNA	29594318	29594389	34.59	+	.	ID=tRNA_0239; Type=Pseudo; Anti-codon=TCC; structure=".>>>.>>..>>>>........<<<<.>>>>>.......<<<<<....>>.>>.......<<.<<<<.<<<..";
LG11	tRNAscan-SE	tRNA	29594781	29594852	32.02	+	.	ID=tRNA_0241; Type=Pseudo; Anti-codon=TAT; structure=">>>>>>>..>>>>........<<<<..>>>.........<<<......>>>>.......<<<<.<<<<<<<.";
LG12	tRNAscan-SE	tRNA	713607	713681	21.31	+	.	ID=tRNA_0029; Type=Pseudo; Anti-codon=ACC; structure=">>>.>>.....>>>>.......<<<<...>>>.........<<<......>.>>>.......<<<.<.<<.<<<.";
LG12	tRNAscan-SE	tRNA	1030572	1030644	23.13	+	.	ID=tRNA_0040; Type=Pseudo; Anti-codon=ACC; structure=">.>>.>>..>>>>.......<<<<...>>>.........<<<......>..>>.......<<..<<<.<<.<.";
LG12	tRNAscan-SE	tRNA	3717863	3717937	22.51	-	.	ID=tRNA_0085; Type=Pseudo; Anti-codon=ACC; structure=">>>.>>.....>>>>.......<<<<...>>>.........<<<......>.>>>.......<<<.<.<<.<<<.";
LG12	tRNAscan-SE	tRNA	4893929	4894012	20.17	+	.	ID=tRNA_0051; Type=Pseudo; Anti-codon=CCC; structure=">>>...>>>..>>............<<.>>>...........<<<...>>><<<....>>>>>.......<<<<.<<<<.<<<.";
LG12	tRNAscan-SE	tRNA	4941629	4941700	49.15	+	.	ID=tRNA_0062; Type=Gly; Anti-codon=TCC; structure=">>>>>>>..>>.>........<.<<.>>>>>.......<<<<<....>>>>>.......<<<<<<<<<<<<.";
LG12	tRNAscan-SE	tRNA	5731558	5731639	84.6	-	.	ID=tRNA_0083; Type=Ser; Anti-codon=CGA; structure=">>>>>>>..>>>..........<<<.>>>>>.......<<<<<.>>>>...<<<<..>>>>>.......<<<<<<<<<<<<.";
LG12	tRNAscan-SE	tRNA	5762049	5762130	88.95	-	.	ID=tRNA_0082; Type=Ser; Anti-codon=AGA; structure=">>>>>>>..>>>..........<<<.>>>>>.......<<<<<.>>>>...<<<<..>>>>>.......<<<<<<<<<<<<.";
LG12	tRNAscan-SE	tRNA	7912935	7913009	27.39	+	.	ID=tRNA_0073; Type=Pseudo; Anti-codon=CCC; structure=">>..>.>..>>.>........<.<<.>>>...........<<<.....>>>>>.......<<<..<<<.<..<<.";
LG12	tRNAscan-SE	tRNA	9808438	9808509	74.8	-	.	ID=tRNA_0081; Type=Ala; Anti-codon=CGC; structure=">>>>>>>..>>>>.......<<<<.>>>>>.......<<<<<.....>>>>>.......<<<<<<<<<<<<.";
LG12	tRNAscan-SE	tRNA	9808918	9808989	74.8	-	.	ID=tRNA_0080; Type=Ala; Anti-codon=CGC; structure=">>>>>>>..>>>>.......<<<<.>>>>>.......<<<<<.....>>>>>.......<<<<<<<<<<<<.";
LG12	tRNAscan-SE	tRNA	9809797	9809868	30.8	-	.	ID=tRNA_0079; Type=Pseudo; Anti-codon=TAC; structure=">>>>>>>..>>>>.......<<<<.>>>>.........<<<<......>>>>.......<<<<.<<<<<<<.";
LG12	tRNAscan-SE	tRNA	11601178	11601259	22.42	-	.	ID=tRNA_0078; Type=Pseudo; Anti-codon=CCC; structure=">.>.>>>..>>.>........<.<<.>>>...........<<<...>>><<<.....>>>>.......<<<<..<<<.<.<.";
LG12	tRNAscan-SE	tRNA	12954194	12954266	83.8	-	.	ID=tRNA_0077; Type=Lys; Anti-codon=TTT; structure=">>>>>>>..>>>>........<<<<.>>>>>.......<<<<<.....>>>>>.......<<<<<<<<<<<<.";
LG12	tRNAscan-SE	tRNA	20863717	20863801	20.17	+	.	ID=tRNA_0084; Type=Pseudo; Anti-codon=TTA; structure=">>>>>>>..>>>>........<<<<..>>.........................<<.....>.>>.......<<.<.<<<<<<<.";
LG12	tRNAscan-SE	tRNA	21995657	21995729	63.6	-	.	ID=tRNA_0076; Type=Arg; Anti-codon=TCG; structure=">>>>>>>..>>>>........<<<<.>>>>>.......<<<<<.....>>>>>.......<<<<<<<<<<<<.";
LG12	tRNAscan-SE	tRNA	22094242	22094350	65.81	-	.	ID=tRNA_0075; Type=Leu; Anti-codon=CAA; structure=">>>>>>>..>>>...........<<<.>>>>>................................<<<<<.>>>>>..<<<<<..>>>>>.......<<<<<<<<<<<<.";
LG12	tRNAscan-SE	tRNA	22095418	22095526	68.26	-	.	ID=tRNA_0074; Type=Leu; Anti-codon=CAA; structure=">>>>>>>..>>>...........<<<.>>>>>................................<<<<<.>>>>>..<<<<<..>>>>>.......<<<<<<<<<<<<.";
LG12	tRNAscan-SE	tRNA	22224810	22224881	76.83	+	.	ID=tRNA_0086; Type=Gly; Anti-codon=TCC; structure=">>>>>>>..>>.>........<.<<.>>>>>.......<<<<<....>>>>>.......<<<<<<<<<<<<.";
LG12	tRNAscan-SE	tRNA	23629436	23629507	24.91	+	.	ID=tRNA_0087; Type=Thr; Anti-codon=TGT; structure=">>>>>>>..>>>.........<<<.>>..>.......<..<<.....>.>.>.......<.<.<<<<<<<<.";
LG12	tRNAscan-SE	tRNA	25845384	25845456	23.5	+	.	ID=tRNA_0088; Type=Pseudo; Anti-codon=???; structure=">>>.>>>..>>>>........<<<<.>>>>...........<<<<....>.>>.......<<.<.<<<.<<<.";
LG12	tRNAscan-SE	tRNA	27331133	27331205	23.74	-	.	ID=tRNA_0072; Type=Pseudo; Anti-codon=ACT; structure=">.>>..>..>>>>.......<<<<...>>>.........<<<......>.>>>.......<<<.<<..<<.<.";
LG12	tRNAscan-SE	tRNA	27594740	27594821	34.65	-	.	ID=tRNA_0071; Type=Pseudo; Anti-codon=CCC; structure=">>>>>>>..>>............<<.>>>...........<<<...>>><<<.....>>>>.......<<<<..<<<<<<<.";
LG12	tRNAscan-SE	tRNA	29369056	29369129	43.95	+	.	ID=tRNA_0030; Type=Pseudo; Anti-codon=TGT; structure=">>..>.>..>>>>.........<<<<.>>>>.........<<<<.....>>..>.......<..<<<.<..<<.";
LG12	tRNAscan-SE	tRNA	29369452	29369525	51.45	+	.	ID=tRNA_0031; Type=Thr; Anti-codon=AGT; structure=">.>>>>>..>>>>.........<<<<.>>>.>.......<.<<<.....>>>>>.......<<<<<<<<<<.<.";
LG12	tRNAscan-SE	tRNA	29369855	29369928	66.4	+	.	ID=tRNA_0032; Type=Thr; Anti-codon=TGT; structure=">>>>>>...>>>>.........<<<<.>>>>>.......<<<<<.....>.>>>.......<<<.<.<<<<<<.";
LG12	tRNAscan-SE	tRNA	29370246	29370319	74.5	+	.	ID=tRNA_0033; Type=Thr; Anti-codon=AGT; structure=">>>>>.>..>>>>.........<<<<.>>>>>.......<<<<<.....>>>>>.......<<<<<<.<<<<<.";
LG12	tRNAscan-SE	tRNA	29370680	29370753	79.12	+	.	ID=tRNA_0034; Type=Thr; Anti-codon=AGT; structure=">>>>>>>..>>>>.........<<<<.>>>>>.......<<<<<.....>>>>>.......<<<<<<<<<<<<.";
LG12	tRNAscan-SE	tRNA	29371108	29371181	79.36	+	.	ID=tRNA_0035; Type=Thr; Anti-codon=TGT; structure=">>>>>>>..>>>>.........<<<<.>>>>>.......<<<<<.....>>>>>.......<<<<<<<<<<<<.";
LG12	tRNAscan-SE	tRNA	29371542	29371615	73.12	+	.	ID=tRNA_0036; Type=Thr; Anti-codon=AGT; structure=">>>>>>>..>>>>.........<<<<.>>>.>.......<.<<<.....>>>>>.......<<<<<<<<<<<<.";
LG12	tRNAscan-SE	tRNA	29371969	29372042	77.64	+	.	ID=tRNA_0037; Type=Thr; Anti-codon=TGT; structure=">>>>>>>..>>>>.........<<<<.>>>>>.......<<<<<.....>>>>>.......<<<<<<<<<<<<.";
LG12	tRNAscan-SE	tRNA	29372402	29372475	79.12	+	.	ID=tRNA_0038; Type=Thr; Anti-codon=AGT; structure=">>>>>>>..>>>>.........<<<<.>>>>>.......<<<<<.....>>>>>.......<<<<<<<<<<<<.";
LG12	tRNAscan-SE	tRNA	29372830	29372903	79.36	+	.	ID=tRNA_0039; Type=Thr; Anti-codon=TGT; structure=">>>>>>>..>>>>.........<<<<.>>>>>.......<<<<<.....>>>>>.......<<<<<<<<<<<<.";
LG12	tRNAscan-SE	tRNA	29373264	29373337	79.12	+	.	ID=tRNA_0041; Type=Thr; Anti-codon=AGT; structure=">>>>>>>..>>>>.........<<<<.>>>>>.......<<<<<.....>>>>>.......<<<<<<<<<<<<.";
LG12	tRNAscan-SE	tRNA	29373691	29373764	77.64	+	.	ID=tRNA_0042; Type=Thr; Anti-codon=TGT; structure=">>>>>>>..>>>>.........<<<<.>>>>>.......<<<<<.....>>>>>.......<<<<<<<<<<<<.";
LG12	tRNAscan-SE	tRNA	29374118	29374191	71.62	+	.	ID=tRNA_0043; Type=Thr; Anti-codon=TGT; structure=">>>>>>>..>>>>.........<<<<.>>>>>.......<<<<<.....>>>>>.......<<<<<<<<<<<<.";
LG12	tRNAscan-SE	tRNA	29374552	29374625	79.12	+	.	ID=tRNA_0044; Type=Thr; Anti-codon=AGT; structure=">>>>>>>..>>>>.........<<<<.>>>>>.......<<<<<.....>>>>>.......<<<<<<<<<<<<.";
LG12	tRNAscan-SE	tRNA	29374980	29375053	75.73	+	.	ID=tRNA_0045; Type=Thr; Anti-codon=TGT; structure=">>>>>>>..>>>>.........<<<<.>>>>>.......<<<<<.....>>>>>.......<<<<<<<<<<<<.";
LG12	tRNAscan-SE	tRNA	29375413	29375486	65.11	+	.	ID=tRNA_0046; Type=Thr; Anti-codon=TGT; structure=">>>>>.>..>>>>.........<<<<.>>>>>.......<<<<<.....>>>>>.......<<<<<<.<<<<<.";
LG12	tRNAscan-SE	tRNA	29375841	29375914	77.64	+	.	ID=tRNA_0047; Type=Thr; Anti-codon=TGT; structure=">>>>>>>..>>>>.........<<<<.>>>>>.......<<<<<.....>>>>>.......<<<<<<<<<<<<.";
LG12	tRNAscan-SE	tRNA	29376274	29376347	74.17	+	.	ID=tRNA_0048; Type=Thr; Anti-codon=AGT; structure=">>>>.>>..>>>>.........<<<<.>>>>>.......<<<<<.....>>>>>.......<<<<<<<.<<<<.";
LG12	tRNAscan-SE	tRNA	29376702	29376775	79.36	+	.	ID=tRNA_0049; Type=Thr; Anti-codon=TGT; structure=">>>>>>>..>>>>.........<<<<.>>>>>.......<<<<<.....>>>>>.......<<<<<<<<<<<<.";
LG12	tRNAscan-SE	tRNA	29377135	29377208	79.12	+	.	ID=tRNA_0050; Type=Thr; Anti-codon=AGT; structure=">>>>>>>..>>>>.........<<<<.>>>>>.......<<<<<.....>>>>>.......<<<<<<<<<<<<.";
LG12	tRNAscan-SE	tRNA	29377568	29377641	79.12	+	.	ID=tRNA_0052; Type=Thr; Anti-codon=AGT; structure=">>>>>>>..>>>>.........<<<<.>>>>>.......<<<<<.....>>>>>.......<<<<<<<<<<<<.";
LG12	tRNAscan-SE	tRNA	29377995	29378068	77.64	+	.	ID=tRNA_0053; Type=Thr; Anti-codon=TGT; structure=">>>>>>>..>>>>.........<<<<.>>>>>.......<<<<<.....>>>>>.......<<<<<<<<<<<<.";
LG12	tRNAscan-SE	tRNA	29378428	29378501	79.12	+	.	ID=tRNA_0054; Type=Thr; Anti-codon=AGT; structure=">>>>>>>..>>>>.........<<<<.>>>>>.......<<<<<.....>>>>>.......<<<<<<<<<<<<.";
LG12	tRNAscan-SE	tRNA	29378862	29378935	79.12	+	.	ID=tRNA_0055; Type=Thr; Anti-codon=AGT; structure=">>>>>>>..>>>>.........<<<<.>>>>>.......<<<<<.....>>>>>.......<<<<<<<<<<<<.";
LG12	tRNAscan-SE	tRNA	29379290	29379363	79.12	+	.	ID=tRNA_0056; Type=Thr; Anti-codon=AGT; structure=">>>>>>>..>>>>.........<<<<.>>>>>.......<<<<<.....>>>>>.......<<<<<<<<<<<<.";
LG12	tRNAscan-SE	tRNA	29379718	29379791	72.84	+	.	ID=tRNA_0057; Type=Thr; Anti-codon=TGT; structure=">>>>>>>..>>>>.........<<<<.>>>>>.......<<<<<.....>>>>>.......<<<<<<<<<<<<.";
LG12	tRNAscan-SE	tRNA	29380427	29380500	79.12	+	.	ID=tRNA_0058; Type=Thr; Anti-codon=AGT; structure=">>>>>>>..>>>>.........<<<<.>>>>>.......<<<<<.....>>>>>.......<<<<<<<<<<<<.";
LG12	tRNAscan-SE	tRNA	29380861	29380934	79.12	+	.	ID=tRNA_0059; Type=Thr; Anti-codon=AGT; structure=">>>>>>>..>>>>.........<<<<.>>>>>.......<<<<<.....>>>>>.......<<<<<<<<<<<<.";
LG12	tRNAscan-SE	tRNA	29381288	29381361	77.64	+	.	ID=tRNA_0060; Type=Thr; Anti-codon=TGT; structure=">>>>>>>..>>>>.........<<<<.>>>>>.......<<<<<.....>>>>>.......<<<<<<<<<<<<.";
LG12	tRNAscan-SE	tRNA	29381722	29381795	79.12	+	.	ID=tRNA_0061; Type=Thr; Anti-codon=AGT; structure=">>>>>>>..>>>>.........<<<<.>>>>>.......<<<<<.....>>>>>.......<<<<<<<<<<<<.";
LG12	tRNAscan-SE	tRNA	29382155	29382228	79.12	+	.	ID=tRNA_0063; Type=Thr; Anti-codon=AGT; structure=">>>>>>>..>>>>.........<<<<.>>>>>.......<<<<<.....>>>>>.......<<<<<<<<<<<<.";
LG12	tRNAscan-SE	tRNA	29382583	29382656	77.64	+	.	ID=tRNA_0064; Type=Thr; Anti-codon=TGT; structure=">>>>>>>..>>>>.........<<<<.>>>>>.......<<<<<.....>>>>>.......<<<<<<<<<<<<.";
LG12	tRNAscan-SE	tRNA	29383011	29383084	72.84	+	.	ID=tRNA_0065; Type=Thr; Anti-codon=TGT; structure=">>>>>>>..>>>>.........<<<<.>>>>>.......<<<<<.....>>>>>.......<<<<<<<<<<<<.";
LG12	tRNAscan-SE	tRNA	29383438	29383511	79.36	+	.	ID=tRNA_0066; Type=Thr; Anti-codon=TGT; structure=">>>>>>>..>>>>.........<<<<.>>>>>.......<<<<<.....>>>>>.......<<<<<<<<<<<<.";
LG12	tRNAscan-SE	tRNA	29383872	29383945	74.5	+	.	ID=tRNA_0067; Type=Thr; Anti-codon=AGT; structure=">>>>>.>..>>>>.........<<<<.>>>>>.......<<<<<.....>>>>>.......<<<<<<.<<<<<.";
LG12	tRNAscan-SE	tRNA	29384299	29384372	72.84	+	.	ID=tRNA_0068; Type=Thr; Anti-codon=TGT; structure=">>>>>>>..>>>>.........<<<<.>>>>>.......<<<<<.....>>>>>.......<<<<<<<<<<<<.";
LG12	tRNAscan-SE	tRNA	29388583	29388656	79.36	+	.	ID=tRNA_0069; Type=Thr; Anti-codon=TGT; structure=">>>>>>>..>>>>.........<<<<.>>>>>.......<<<<<.....>>>>>.......<<<<<<<<<<<<.";
LG12	tRNAscan-SE	tRNA	29389012	29389085	79.12	+	.	ID=tRNA_0070; Type=Thr; Anti-codon=AGT; structure=">>>>>>>..>>>>.........<<<<.>>>>>.......<<<<<.....>>>>>.......<<<<<<<<<<<<.";
LG13	tRNAscan-SE	tRNA	2788301	2788371	27.59	+	.	ID=tRNA_0003; Type=Pseudo; Anti-codon=GCC; structure=">.>>..>...>>>.......<<<..>>>.........<.<<.....>.>>>.......<<<.<<..<<.<.";
LG13	tRNAscan-SE	tRNA	3648052	3648123	71.1	-	.	ID=tRNA_0002; Type=Asp; Anti-codon=GTC; structure=">>>>>>>..>>>>........<<<<.>>>>>.......<<<<<....>>>>>.......<<<<<<<<<<<<.";
LG13	tRNAscan-SE	tRNA	3675890	3675961	71.1	-	.	ID=tRNA_0019; Type=Asp; Anti-codon=GTC; structure=">>>>>>>..>>>>........<<<<.>>>>>.......<<<<<....>>>>>.......<<<<<<<<<<<<.";
LG13	tRNAscan-SE	tRNA	4515874	4515965	69.96	-	.	ID=tRNA_0018; Type=Arg; Anti-codon=TCT; structure=">>>>>>>..>>>>........<<<<.>>>>>..........................<<<<<.....>>>>>.......<<<<<<<<<<<<.";
LG13	tRNAscan-SE	tRNA	4516197	4516288	71.38	-	.	ID=tRNA_0017; Type=Arg; Anti-codon=TCT; structure=">>>>>>>..>>>>........<<<<.>>>>>..........................<<<<<.....>>>>>.......<<<<<<<<<<<<.";
LG13	tRNAscan-SE	tRNA	4882587	4882664	34.92	-	.	ID=tRNA_0016; Type=Pseudo; Anti-codon=TAG; structure=">>>.>.>>..........<<..>>>>>.......<<<<<.>>>>...<<<<..>>>>>.......<<<<<..<.<<<.";
LG13	tRNAscan-SE	tRNA	4889536	4889623	74	-	.	ID=tRNA_0015; Type=Tyr; Anti-codon=GTA; structure=">>>>>>>..>>>>........<<<<.>>>>>......................<<<<<.....>>>>>.......<<<<<<<<<<<<.";
LG13	tRNAscan-SE	tRNA	5307857	5307924	20.2	-	.	ID=tRNA_0014; Type=Pseudo; Anti-codon=AAC; structure=">>>>....>>>........<<<...>>>.........<<<......>>>>>.......<<<<<<<<<.";
LG13	tRNAscan-SE	tRNA	5610180	5610262	67.49	+	.	ID=tRNA_0004; Type=Leu; Anti-codon=CAA; structure=">>>>>>>..>>>..........<<<.>>>>>.......<<<<<..>>>.><.<<<...>>>>>.......<<<<<<<<<<<<.";
LG13	tRNAscan-SE	tRNA	5612472	5612554	72.4	+	.	ID=tRNA_0005; Type=Leu; Anti-codon=TAA; structure=">>>>>>>..>>>..........<<<.>>>>>.......<<<<<..>>.......<<..>>>>>.......<<<<<<<<<<<<.";
LG13	tRNAscan-SE	tRNA	5612788	5612870	73.56	+	.	ID=tRNA_0006; Type=Leu; Anti-codon=TAA; structure=">>>>>>>..>>>..........<<<.>>>>>.......<<<<<..>>.......<<..>>>>>.......<<<<<<<<<<<<.";
LG13	tRNAscan-SE	tRNA	5613222	5613304	73.58	+	.	ID=tRNA_0007; Type=Leu; Anti-codon=TAA; structure=">>>>>>>..>>>..........<<<.>>>>>.......<<<<<..>>.......<<..>>>>>.......<<<<<<<<<<<<.";
LG13	tRNAscan-SE	tRNA	5731823	5731905	71.84	-	.	ID=tRNA_0013; Type=Leu; Anti-codon=TAA; structure=">>>>>>>..>>>..........<<<.>>>>>.......<<<<<..>>.......<<..>>>>>.......<<<<<<<<<<<<.";
LG13	tRNAscan-SE	tRNA	5989084	5989166	74.41	-	.	ID=tRNA_0012; Type=Leu; Anti-codon=CAA; structure=">>>>>>>..>>>..........<<<.>>>>>.......<<<<<..>>>....<<<...>>>>>.......<<<<<<<<<<<<.";
LG13	tRNAscan-SE	tRNA	5989297	5989379	72.12	-	.	ID=tRNA_0001; Type=Leu; Anti-codon=TAA; structure=">>>>>>>..>>>..........<<<.>>>>>.......<<<<<..>>>....<<<...>>>>>.......<<<<<<<<<<<<.";
LG13	tRNAscan-SE	tRNA	6466828	6466901	72.95	+	.	ID=tRNA_0008; Type=Arg; Anti-codon=TCT; structure=">>>>>>>..>>>>.........<<<<.>>>>>.......<<<<<.....>>>>>.......<<<<<<<<<<<<.";
LG13	tRNAscan-SE	tRNA	8470392	8470473	20.47	+	.	ID=tRNA_0009; Type=Pseudo; Anti-codon=CCC; structure=">>..>>>..>>.>........<.<<.>>>...........<<<...>>><<<.....>>>>.......<<<<..<<<..<<.";
LG13	tRNAscan-SE	tRNA	9884969	9885057	20.05	+	.	ID=tRNA_0010; Type=Pseudo; Anti-codon=CTT; structure=">.>>>>>..>>>>........<<<<..................>>>.>.......<.<<<.....>.>>.......<<.<.<<<<<.<.";
LG13	tRNAscan-SE	tRNA	10005194	10005265	23.09	+	.	ID=tRNA_0011; Type=Pseudo; Anti-codon=TTC; structure=".>>>.>>..>.>..........<.<.>..>.........<..<......>>>.......<<<..<<.<<<..";
LG13	tRNAscan-SE	tRNA	10254059	10254132	20.76	+	.	ID=tRNA_0104; Type=Pseudo; Anti-codon=ACC; structure=">.>...>..>>>>........<<<<...>>>.........<<<......>>.>>.......<<.<<<...<.<.";
LG13	tRNAscan-SE	tRNA	10597976	10598067	68.85	+	.	ID=tRNA_0115; Type=Arg; Anti-codon=TCT; structure=">>>>>>>..>>>>........<<<<.>>>>>..........................<<<<<.....>>>>>.......<<<<<<<<<<<<.";
LG13	tRNAscan-SE	tRNA	10600725	10600816	66.54	+	.	ID=tRNA_0118; Type=Arg; Anti-codon=TCT; structure=">>>>>>>..>>>>........<<<<.>>>>>..........................<<<<<.....>>>>>.......<<<<<<<<<<<<.";
LG13	tRNAscan-SE	tRNA	10604680	10604771	67.02	+	.	ID=tRNA_0119; Type=Arg; Anti-codon=TCT; structure=">>>>>>>..>>>>........<<<<.>>>>>..........................<<<<<.....>>>>>.......<<<<<<<<<<<<.";
LG13	tRNAscan-SE	tRNA	13477796	13477868	23.42	+	.	ID=tRNA_0120; Type=Pseudo; Anti-codon=ACC; structure=">.>>..>..>>>>.......<<<<...>>>.........<<<......>.>>>.......<<<.<<..<<.<.";
LG13	tRNAscan-SE	tRNA	14511961	14512043	22.15	-	.	ID=tRNA_0117; Type=Pseudo; Anti-codon=CCC; structure=">>..>.>..>>............<<.>>>...........<<<...>>><<<....>>>>>.......<<<..<<<.<..<<.";
LG13	tRNAscan-SE	tRNA	14693364	14693435	76.83	-	.	ID=tRNA_0116; Type=Gly; Anti-codon=TCC; structure=">>>>>>>..>>.>........<.<<.>>>>>.......<<<<<....>>>>>.......<<<<<<<<<<<<.";
LG13	tRNAscan-SE	tRNA	14693668	14693741	78.21	-	.	ID=tRNA_0114; Type=Ile; Anti-codon=AAT; structure=">>>>.>>..>>>>.........<<<<.>>>>>.......<<<<<.....>>>>>.......<<<<<<<.<<<<.";
LG13	tRNAscan-SE	tRNA	14693975	14694046	74	+	.	ID=tRNA_0121; Type=Trp; Anti-codon=CCA; structure=">>>>>>>..>>>>.......<<<<.>>>>>.......<<<<<.....>>>>>.......<<<<<<<<<<<<.";
LG13	tRNAscan-SE	tRNA	14694828	14694899	75.92	-	.	ID=tRNA_0113; Type=Pro; Anti-codon=AGG; structure=">>>>>>>..>>>.........<<<.>>>>>.......<<<<<.....>>>>>.......<<<<<<<<<<<<.";
LG13	tRNAscan-SE	tRNA	18723203	18723275	68.89	-	.	ID=tRNA_0112; Type=Arg; Anti-codon=CCT; structure=">>>>>>>..>>>>........<<<<.>>>>>.......<<<<<.....>>>>>.......<<<<<<<<<<<<.";
LG13	tRNAscan-SE	tRNA	18726071	18726142	65.91	-	.	ID=tRNA_0111; Type=Met; Anti-codon=CAT; structure=">>>>>>>..>>>>.......<<<<.>>>>>.......<<<<<.....>>>>>.......<<<<<<<<<<<<.";
LG13	tRNAscan-SE	tRNA	18727339	18727412	82.24	+	.	ID=tRNA_0122; Type=Asn; Anti-codon=GTT; structure=">>>>>>>..>>>>.........<<<<.>>>>>.......<<<<<.....>>>>>.......<<<<<<<<<<<<.";
LG13	tRNAscan-SE	tRNA	19190678	19190750	80.47	+	.	ID=tRNA_0123; Type=Lys; Anti-codon=CTT; structure=">>>>>>>..>>>>........<<<<.>>>>>.......<<<<<.....>>>>>.......<<<<<<<<<<<<.";
LG13	tRNAscan-SE	tRNA	19724884	19724955	76.15	-	.	ID=tRNA_0110; Type=Pro; Anti-codon=TGG; structure=">>>>>>>..>>>.........<<<.>>>>>.......<<<<<.....>>>>>.......<<<<<<<<<<<<.";
LG13	tRNAscan-SE	tRNA	19756597	19756669	22.12	-	.	ID=tRNA_0109; Type=Pseudo; Anti-codon=ACT; structure=">.>>..>..>>>>.......<<<<...>>>.........<<<......>.>>>.......<<<.<<..<<.<.";
LG13	tRNAscan-SE	tRNA	21091730	21091804	35.64	-	.	ID=tRNA_0108; Type=Pseudo; Anti-codon=CCC; structure=">>..>.>..>>>..........<<<.>>>...........<<<.....>>>>>.......<<<..<<<.<..<<.";
LG13	tRNAscan-SE	tRNA	22101653	22101724	76.61	-	.	ID=tRNA_0107; Type=Glu; Anti-codon=CTC; structure=">>>>>>>..>>>>........<<<<.>>>>>.......<<<<<....>>>>>.......<<<<<<<<<<<<.";
LG13	tRNAscan-SE	tRNA	24731470	24731542	22.89	+	.	ID=tRNA_0124; Type=Pseudo; Anti-codon=ACC; structure=">.>>..>..>>>>.......<<<<...>>>.........<<<......>.>>>.......<<<.<<..<<.<.";
LG13	tRNAscan-SE	tRNA	24969797	24969871	27.39	+	.	ID=tRNA_0105; Type=Pseudo; Anti-codon=CCC; structure=">>..>.>..>>.>........<.<<.>>>...........<<<.....>>>>>.......<<<..<<<.<..<<.";
LG13	tRNAscan-SE	tRNA	25177517	25177587	29.31	-	.	ID=tRNA_0106; Type=Pseudo; Anti-codon=ACC; structure=".>>>..>..>>>>.......<<<<.>>>.........<.<<.....>.>>>.......<<<.<<..<<<..";
LG13	tRNAscan-SE	tRNA	25842394	25842468	35.64	-	.	ID=tRNA_0104; Type=Pseudo; Anti-codon=CCC; structure=">>..>.>..>>>..........<<<.>>>...........<<<.....>>>>>.......<<<..<<<.<..<<.";
LG13	tRNAscan-SE	tRNA	27064965	27065053	22.02	-	.	ID=tRNA_0103; Type=Pseudo; Anti-codon=ATG; structure=">.>.>>>..>>>>........<<<<.>>>>.........................<<<.<....>>.>>.......<<.<<<<<.<.<.";
LG13	tRNAscan-SE	tRNA	27117048	27117118	21.45	+	.	ID=tRNA_0102; Type=Pseudo; Anti-codon=ACC; structure=">>.>>....>>>>.......<<<<...>>>.........<.<<.....>.>.>.......<.<.<<<.<<.";
LG13	tRNAscan-SE	tRNA	27136391	27136473	21.19	+	.	ID=tRNA_0105; Type=Pseudo; Anti-codon=CCC; structure=">>..>.>..>>............<<.>>>...........<<<...>>><<<....>>>>>.......<<<..<<<.<..<<.";
LG13	tRNAscan-SE	tRNA	27299370	27299443	24.04	-	.	ID=tRNA_0112; Type=Pseudo; Anti-codon=CCC; structure=">.>>.>..>>............<<.>>>...........<<<.....>>>>>.......<<<..<<<.<.<.<.";
LG13	tRNAscan-SE	tRNA	27447315	27447386	76.83	-	.	ID=tRNA_0111; Type=Gly; Anti-codon=TCC; structure=">>>>>>>..>>.>........<.<<.>>>>>.......<<<<<....>>>>>.......<<<<<<<<<<<<.";
LG13	tRNAscan-SE	tRNA	27448250	27448322	80.47	-	.	ID=tRNA_0110; Type=Lys; Anti-codon=CTT; structure=">>>>>>>..>>>>........<<<<.>>>>>.......<<<<<.....>>>>>.......<<<<<<<<<<<<.";
LG13	tRNAscan-SE	tRNA	27448565	27448636	71.18	+	.	ID=tRNA_0106; Type=Asp; Anti-codon=GTC; structure=">>>>>>>..>>>>........<<<<.>>>>>.......<<<<<....>>>>>.......<<<<<<<<<<<<.";
LG13	tRNAscan-SE	tRNA	27536159	27536231	21.95	+	.	ID=tRNA_0107; Type=Pseudo; Anti-codon=ACC; structure=">.>>..>..>>>>.......<<<<...>>>.........<<<......>.>>>.......<<<.<<..<<.<.";
LG13	tRNAscan-SE	tRNA	29012692	29012764	24.74	+	.	ID=tRNA_0108; Type=Pseudo; Anti-codon=ATT; structure=">..>.....>>>>.......<<<<..>.>>.........<<<......>.>>>.......<<<.<...<..<.";
LG13	tRNAscan-SE	tRNA	29842570	29842645	21.51	+	.	ID=tRNA_0109; Type=Pseudo; Anti-codon=ACC; structure=">>>>.>>.....>>>>.......<<<<...>>>.........<<<......>.>>>.......<<<.<<<.<<<<.";
LG14	tRNAscan-SE	tRNA	65773	65845	24.2	+	.	ID=tRNA_0028; Type=Pseudo; Anti-codon=ACC; structure=">.>>..>..>>>>.......<<<<...>>>>.......<<<<......>.>>>.......<<<.<<..<<.<.";
LG14	tRNAscan-SE	tRNA	130839	130914	25.07	+	.	ID=tRNA_0029; Type=Pseudo; Anti-codon=ACC; structure=">>.>.>>.....>>>>.......<<<<...>>>.........<<<......>.>>>.......<<<.<<<.<.<<.";
LG14	tRNAscan-SE	tRNA	217409	217479	25.4	+	.	ID=tRNA_0030; Type=Pseudo; Anti-codon=ACC; structure=">.>>..>..>>>>.......<<<<...>>>.........<<<......>.>>>.......<<<.<<<<.<.";
LG14	tRNAscan-SE	tRNA	483001	483076	21.18	+	.	ID=tRNA_0031; Type=Pseudo; Anti-codon=ACC; structure=">>>>>.>.....>>>>.......<<<<...>>>.........<<<......>>.>>.......<<.<<<.<<<<<.";
LG14	tRNAscan-SE	tRNA	699793	699864	22.89	+	.	ID=tRNA_0032; Type=Pseudo; Anti-codon=ACT; structure=">>>>..>..>>>>.......<<<<...>>>.........<<<........>>.........<<.<..<<<<.";
LG14	tRNAscan-SE	tRNA	1172302	1172377	21.2	-	.	ID=tRNA_0091; Type=Pseudo; Anti-codon=CAC; structure=">>>.>>>..>>>>........<<<<..>>...........<<......>>>.............<<<.<<<.<<<.";
LG14	tRNAscan-SE	tRNA	1210646	1210718	22.84	+	.	ID=tRNA_0074; Type=Pseudo; Anti-codon=???; structure=">.>>..>..>>>>.......<<<<...>>............<<.....>.>>>.......<<<.<<..<<.<.";
LG14	tRNAscan-SE	tRNA	1888559	1888633	24.51	+	.	ID=tRNA_0085; Type=Pseudo; Anti-codon=ACC; structure=">>>.>>...>..>>>.......<<<.<..>>>.........<<<......>.>>>.......<<<.<.<<.<<<.";
LG14	tRNAscan-SE	tRNA	3222292	3222364	21.65	-	.	ID=tRNA_0090; Type=Pseudo; Anti-codon=AGT; structure=">>.>>....>>>>........<<<<..>>...........<<......>>.>>.......<<.<<..<<.<<.";
LG14	tRNAscan-SE	tRNA	3435560	3435630	29.66	-	.	ID=tRNA_0089; Type=Pseudo; Anti-codon=ACC; structure=">.>>..>...>>>.......<<<..>>>.........<.<<.....>.>>>.......<<<.<<..<<.<.";
LG14	tRNAscan-SE	tRNA	5687967	5688036	20.02	+	.	ID=tRNA_0092; Type=Pseudo; Anti-codon=TTC; structure=">.>>.>>..>.>..........<.<.>..>.........<..<.....>>>.......<<<.<<.<<.<.";
LG14	tRNAscan-SE	tRNA	7277801	7277873	75.05	-	.	ID=tRNA_0088; Type=Val; Anti-codon=AAC; structure=">>>>>>>..>>>..........<<<.>>>>>.......<<<<<.....>>>>>.......<<<<<<<<<<<<.";
LG14	tRNAscan-SE	tRNA	7280654	7280726	82.97	-	.	ID=tRNA_0087; Type=Val; Anti-codon=AAC; structure=">>>>>>>..>>>..........<<<.>>>>>.......<<<<<.....>>>>>.......<<<<<<<<<<<<.";
LG14	tRNAscan-SE	tRNA	9790193	9790272	20.73	+	.	ID=tRNA_0093; Type=Pseudo; Anti-codon=CAT; structure=">>>.>>>..>>>>........<<<<.>>.>>...............<<.<<.....>.>>.......<<.<.<<<.<<<.";
LG14	tRNAscan-SE	tRNA	11379717	11379786	20.58	-	.	ID=tRNA_0086; Type=Pseudo; Anti-codon=ATC; structure=">.>>>>>..>>>>.......<<<<...>>>.........<<<......>>.>>......<<<<<<<<<<.";
LG14	tRNAscan-SE	tRNA	11750576	11750653	23.31	+	.	ID=tRNA_0094; Type=Pseudo; Anti-codon=GTA; structure=">>>>>>>..>>>>........<<<<.>.>>>.....<<<.<............>..>>.......<<..<<<<<<<<.";
LG14	tRNAscan-SE	tRNA	12354891	12354964	28.66	+	.	ID=tRNA_0095; Type=Pseudo; Anti-codon=CCC; structure=">>...>>..>>............<<.>>>...........<<<......>>>>.......<<<<..<<...<<.";
LG14	tRNAscan-SE	tRNA	12972602	12972673	66.12	+	.	ID=tRNA_0096; Type=His; Anti-codon=GTG; structure=">>>>>>>..>>>>........<<<<.>>>>>.......<<<<<....>>>>>.......<<<<<<<<<<<<.";
LG14	tRNAscan-SE	tRNA	12972914	12972986	66.62	+	.	ID=tRNA_0097; Type=Arg; Anti-codon=ACG; structure=">>>>>>>..>>>..........<<<.>>>>>.......<<<<<.....>>>>>.......<<<<<<<<<<<<.";
LG14	tRNAscan-SE	tRNA	12973736	12973805	49.66	+	.	ID=tRNA_0098; Type=Arg; Anti-codon=ACG; structure=">>>>>>>..>>>.......<<<.>>>>>.......<<<<<.....>>>>>.......<<<<<<<<<<<<.";
LG14	tRNAscan-SE	tRNA	12974246	12974317	66.12	+	.	ID=tRNA_0075; Type=His; Anti-codon=GTG; structure=">>>>>>>..>>>>........<<<<.>>>>>.......<<<<<....>>>>>.......<<<<<<<<<<<<.";
LG14	tRNAscan-SE	tRNA	12975905	12975977	61.54	+	.	ID=tRNA_0076; Type=Arg; Anti-codon=ACG; structure=">>>>.>>..>>>..........<<<.>>>>>.......<<<<<.....>>>>>.......<<<<<<<.<<<<.";
LG14	tRNAscan-SE	tRNA	12977919	12977991	66.62	+	.	ID=tRNA_0077; Type=Arg; Anti-codon=ACG; structure=">>>>>>>..>>>..........<<<.>>>>>.......<<<<<.....>>>>>.......<<<<<<<<<<<<.";
LG14	tRNAscan-SE	tRNA	12980273	12980344	61.42	+	.	ID=tRNA_0078; Type=His; Anti-codon=GTG; structure=">>>>>>>..>>>>........<<<<.>>>>>.......<<<<<....>>.>>.......<<.<<<<<<<<<.";
LG14	tRNAscan-SE	tRNA	12980585	12980657	66.62	+	.	ID=tRNA_0079; Type=Arg; Anti-codon=ACG; structure=">>>>>>>..>>>..........<<<.>>>>>.......<<<<<.....>>>>>.......<<<<<<<<<<<<.";
LG14	tRNAscan-SE	tRNA	14742945	14743016	74	-	.	ID=tRNA_0084; Type=Trp; Anti-codon=CCA; structure=">>>>>>>..>>>>.......<<<<.>>>>>.......<<<<<.....>>>>>.......<<<<<<<<<<<<.";
LG14	tRNAscan-SE	tRNA	15529146	15529217	75	+	.	ID=tRNA_0080; Type=Glu; Anti-codon=TTC; structure=">>>>>>>..>>>>........<<<<.>>>>>.......<<<<<....>>>>>.......<<<<<<<<<<<<.";
LG14	tRNAscan-SE	tRNA	16502277	16502348	74	-	.	ID=tRNA_0083; Type=Trp; Anti-codon=CCA; structure=">>>>>>>..>>>>.......<<<<.>>>>>.......<<<<<.....>>>>>.......<<<<<<<<<<<<.";
LG14	tRNAscan-SE	tRNA	16591025	16591098	84.06	-	.	ID=tRNA_0082; Type=Thr; Anti-codon=AGT; structure=">>>>>>>..>>>>.........<<<<.>>>>>.......<<<<<.....>>>>>.......<<<<<<<<<<<<.";
LG14	tRNAscan-SE	tRNA	17243117	17243198	85.34	-	.	ID=tRNA_0081; Type=Ser; Anti-codon=GCT; structure=">>>>>>>..>>>..........<<<.>>>>>.......<<<<<.>>>>...<<<<..>>>>>.......<<<<<<<<<<<<.";
LG14	tRNAscan-SE	tRNA	21382005	21382077	85.14	-	.	ID=tRNA_0136; Type=Val; Anti-codon=AAC; structure=">>>>>>>..>>>..........<<<.>>>>>.......<<<<<.....>>>>>.......<<<<<<<<<<<<.";
LG14	tRNAscan-SE	tRNA	21382209	21382280	71.18	+	.	ID=tRNA_0137; Type=Asp; Anti-codon=GTC; structure=">>>>>>>..>>>>........<<<<.>>>>>.......<<<<<....>>>>>.......<<<<<<<<<<<<.";
LG14	tRNAscan-SE	tRNA	21384646	21384718	87.39	-	.	ID=tRNA_0135; Type=Val; Anti-codon=CAC; structure=">>>>>>>..>>>..........<<<.>>>>>.......<<<<<.....>>>>>.......<<<<<<<<<<<<.";
LG14	tRNAscan-SE	tRNA	21384853	21384924	61.03	+	.	ID=tRNA_0138; Type=Asp; Anti-codon=GTC; structure=">.>>>>>..>>>>........<<<<.>>>>>.......<<<<<....>>>>>.......<<<<<<<<<<.<.";
LG14	tRNAscan-SE	tRNA	21385940	21386012	85.14	-	.	ID=tRNA_0134; Type=Val; Anti-codon=AAC; structure=">>>>>>>..>>>..........<<<.>>>>>.......<<<<<.....>>>>>.......<<<<<<<<<<<<.";
LG14	tRNAscan-SE	tRNA	21386515	21386587	87.39	-	.	ID=tRNA_0132; Type=Val; Anti-codon=CAC; structure=">>>>>>>..>>>..........<<<.>>>>>.......<<<<<.....>>>>>.......<<<<<<<<<<<<.";
LG14	tRNAscan-SE	tRNA	21563939	21564011	84.8	-	.	ID=tRNA_0131; Type=Val; Anti-codon=TAC; structure=">>>>>>>..>>>..........<<<.>>>>>.......<<<<<.....>>>>>.......<<<<<<<<<<<<.";
LG14	tRNAscan-SE	tRNA	21564376	21564448	76.95	-	.	ID=tRNA_0130; Type=Val; Anti-codon=TAC; structure=">>>>>>>..>>>..........<<<.>>>>>.......<<<<<.....>>>>>.......<<<<<<<<<<<<.";
LG14	tRNAscan-SE	tRNA	21565901	21565973	84.8	-	.	ID=tRNA_0129; Type=Val; Anti-codon=TAC; structure=">>>>>>>..>>>..........<<<.>>>>>.......<<<<<.....>>>>>.......<<<<<<<<<<<<.";
LG14	tRNAscan-SE	tRNA	21566915	21566987	84.8	-	.	ID=tRNA_0128; Type=Val; Anti-codon=TAC; structure=">>>>>>>..>>>..........<<<.>>>>>.......<<<<<.....>>>>>.......<<<<<<<<<<<<.";
LG14	tRNAscan-SE	tRNA	21634769	21634879	65.77	-	.	ID=tRNA_0127; Type=Leu; Anti-codon=CAA; structure=">>>>>>>..>>>...........<<<.>>>>>..................................<<<<<.>>>>>..<<<<<..>>>>>.......<<<<<<<<<<<<.";
LG14	tRNAscan-SE	tRNA	22078897	22078985	73.56	-	.	ID=tRNA_0126; Type=Tyr; Anti-codon=GTA; structure=">>>>>>>..>>>>........<<<<.>>>>>.......................<<<<<.....>>>>>.......<<<<<<<<<<<<.";
LG14	tRNAscan-SE	tRNA	22079720	22079808	73.56	-	.	ID=tRNA_0125; Type=Tyr; Anti-codon=GTA; structure=">>>>>>>..>>>>........<<<<.>>>>>.......................<<<<<.....>>>>>.......<<<<<<<<<<<<.";
LG14	tRNAscan-SE	tRNA	22080543	22080631	73.56	-	.	ID=tRNA_0124; Type=Tyr; Anti-codon=GTA; structure=">>>>>>>..>>>>........<<<<.>>>>>.......................<<<<<.....>>>>>.......<<<<<<<<<<<<.";
LG14	tRNAscan-SE	tRNA	22081368	22081456	73.56	-	.	ID=tRNA_0123; Type=Tyr; Anti-codon=GTA; structure=">>>>>>>..>>>>........<<<<.>>>>>.......................<<<<<.....>>>>>.......<<<<<<<<<<<<.";
LG14	tRNAscan-SE	tRNA	22082189	22082277	73.56	-	.	ID=tRNA_0121; Type=Tyr; Anti-codon=GTA; structure=">>>>>>>..>>>>........<<<<.>>>>>.......................<<<<<.....>>>>>.......<<<<<<<<<<<<.";
LG14	tRNAscan-SE	tRNA	22083016	22083104	73.56	-	.	ID=tRNA_0120; Type=Tyr; Anti-codon=GTA; structure=">>>>>>>..>>>>........<<<<.>>>>>.......................<<<<<.....>>>>>.......<<<<<<<<<<<<.";
LG14	tRNAscan-SE	tRNA	22083845	22083933	73.56	-	.	ID=tRNA_0119; Type=Tyr; Anti-codon=GTA; structure=">>>>>>>..>>>>........<<<<.>>>>>.......................<<<<<.....>>>>>.......<<<<<<<<<<<<.";
LG14	tRNAscan-SE	tRNA	22084668	22084756	73.56	-	.	ID=tRNA_0118; Type=Tyr; Anti-codon=GTA; structure=">>>>>>>..>>>>........<<<<.>>>>>.......................<<<<<.....>>>>>.......<<<<<<<<<<<<.";
LG14	tRNAscan-SE	tRNA	22085492	22085580	73.56	-	.	ID=tRNA_0117; Type=Tyr; Anti-codon=GTA; structure=">>>>>>>..>>>>........<<<<.>>>>>.......................<<<<<.....>>>>>.......<<<<<<<<<<<<.";
LG14	tRNAscan-SE	tRNA	22086312	22086400	73.56	-	.	ID=tRNA_0116; Type=Tyr; Anti-codon=GTA; structure=">>>>>>>..>>>>........<<<<.>>>>>.......................<<<<<.....>>>>>.......<<<<<<<<<<<<.";
LG14	tRNAscan-SE	tRNA	22087130	22087218	73.56	-	.	ID=tRNA_0115; Type=Tyr; Anti-codon=GTA; structure=">>>>>>>..>>>>........<<<<.>>>>>.......................<<<<<.....>>>>>.......<<<<<<<<<<<<.";
LG14	tRNAscan-SE	tRNA	22087951	22088039	73.56	-	.	ID=tRNA_0114; Type=Tyr; Anti-codon=GTA; structure=">>>>>>>..>>>>........<<<<.>>>>>.......................<<<<<.....>>>>>.......<<<<<<<<<<<<.";
LG14	tRNAscan-SE	tRNA	22088772	22088860	73.56	-	.	ID=tRNA_0113; Type=Tyr; Anti-codon=GTA; structure=">>>>>>>..>>>>........<<<<.>>>>>.......................<<<<<.....>>>>>.......<<<<<<<<<<<<.";
LG14	tRNAscan-SE	tRNA	22089655	22089743	68.99	-	.	ID=tRNA_0112; Type=Tyr; Anti-codon=GTA; structure=">>>>>>>..>>>>........<<<<.>>>>>.......................<<<<<.....>>>>>.......<<<<<<<<<<<<.";
LG14	tRNAscan-SE	tRNA	22090299	22090387	73.56	-	.	ID=tRNA_0110; Type=Tyr; Anti-codon=GTA; structure=">>>>>>>..>>>>........<<<<.>>>>>.......................<<<<<.....>>>>>.......<<<<<<<<<<<<.";
LG14	tRNAscan-SE	tRNA	22091122	22091210	73.56	-	.	ID=tRNA_0109; Type=Tyr; Anti-codon=GTA; structure=">>>>>>>..>>>>........<<<<.>>>>>.......................<<<<<.....>>>>>.......<<<<<<<<<<<<.";
LG14	tRNAscan-SE	tRNA	22091943	22092030	51.67	-	.	ID=tRNA_0108; Type=Tyr; Anti-codon=GTA; structure=">>.>>>>..>>>>........<<<<.>>>>>.......................<<<<<.....>>>>........<<<<<<<<.<<.";
LG14	tRNAscan-SE	tRNA	22092761	22092848	61.46	-	.	ID=tRNA_0107; Type=Tyr; Anti-codon=GTA; structure=">>>>>>>..>>>>........<<<<.>>>>>.......................<<<<<.....>>.>>.......<<<<<<<<<<<.";
LG14	tRNAscan-SE	tRNA	22093589	22093677	73.56	-	.	ID=tRNA_0106; Type=Tyr; Anti-codon=GTA; structure=">>>>>>>..>>>>........<<<<.>>>>>.......................<<<<<.....>>>>>.......<<<<<<<<<<<<.";
LG14	tRNAscan-SE	tRNA	22094411	22094499	73.56	-	.	ID=tRNA_0105; Type=Tyr; Anti-codon=GTA; structure=">>>>>>>..>>>>........<<<<.>>>>>.......................<<<<<.....>>>>>.......<<<<<<<<<<<<.";
LG14	tRNAscan-SE	tRNA	22095297	22095385	68.99	-	.	ID=tRNA_0104; Type=Tyr; Anti-codon=GTA; structure=">>>>>>>..>>>>........<<<<.>>>>>.......................<<<<<.....>>>>>.......<<<<<<<<<<<<.";
LG14	tRNAscan-SE	tRNA	22096120	22096208	72.1	-	.	ID=tRNA_0103; Type=Tyr; Anti-codon=GTA; structure=">>>>>>>..>>>>........<<<<.>>>>>.......................<<<<<.....>>>>>.......<<<<<<<<<<<<.";
LG14	tRNAscan-SE	tRNA	23274648	23274722	27.53	+	.	ID=tRNA_0139; Type=Pseudo; Anti-codon=CCC; structure=">>..>.>..>>............<<.>>>...........<<<.....>>>>>.......<<<..<<<.<..<<.";
LG14	tRNAscan-SE	tRNA	25556882	25556953	71.1	+	.	ID=tRNA_0140; Type=Asp; Anti-codon=GTC; structure=">>>>>>>..>>>>........<<<<.>>>>>.......<<<<<....>>>>>.......<<<<<<<<<<<<.";
LG14	tRNAscan-SE	tRNA	25783065	25783137	85.14	-	.	ID=tRNA_0102; Type=Val; Anti-codon=AAC; structure=">>>>>>>..>>>..........<<<.>>>>>.......<<<<<.....>>>>>.......<<<<<<<<<<<<.";
LG14	tRNAscan-SE	tRNA	25783379	25783451	87.39	-	.	ID=tRNA_0101; Type=Val; Anti-codon=CAC; structure=">>>>>>>..>>>..........<<<.>>>>>.......<<<<<.....>>>>>.......<<<<<<<<<<<<.";
LG14	tRNAscan-SE	tRNA	25784959	25785031	85.14	-	.	ID=tRNA_0099; Type=Val; Anti-codon=AAC; structure=">>>>>>>..>>>..........<<<.>>>>>.......<<<<<.....>>>>>.......<<<<<<<<<<<<.";
LG14	tRNAscan-SE	tRNA	25785292	25785364	87.39	-	.	ID=tRNA_0098; Type=Val; Anti-codon=CAC; structure=">>>>>>>..>>>..........<<<.>>>>>.......<<<<<.....>>>>>.......<<<<<<<<<<<<.";
LG14	tRNAscan-SE	tRNA	25797517	25797588	74	-	.	ID=tRNA_0097; Type=Trp; Anti-codon=CCA; structure=">>>>>>>..>>>>.......<<<<.>>>>>.......<<<<<.....>>>>>.......<<<<<<<<<<<<.";
LG14	tRNAscan-SE	tRNA	25798245	25798316	76.61	+	.	ID=tRNA_0141; Type=Glu; Anti-codon=CTC; structure=">>>>>>>..>>>>........<<<<.>>>>>.......<<<<<....>>>>>.......<<<<<<<<<<<<.";
LG14	tRNAscan-SE	tRNA	25830036	25830107	63.2	+	.	ID=tRNA_0142; Type=Asp; Anti-codon=GTC; structure=">>>>>>>..>>>>........<<<<.>>>>>.......<<<<<....>>>>.........<<<<<<<<<<<.";
LG14	tRNAscan-SE	tRNA	25837772	25837843	71.1	-	.	ID=tRNA_0096; Type=Asp; Anti-codon=GTC; structure=">>>>>>>..>>>>........<<<<.>>>>>.......<<<<<....>>>>>.......<<<<<<<<<<<<.";
LG14	tRNAscan-SE	tRNA	25839912	25839983	68.47	-	.	ID=tRNA_0095; Type=Asp; Anti-codon=GTC; structure=">>>>>>>..>>>>........<<<<.>>>>>.......<<<<<....>>>>>.......<<<<<<<<<<<<.";
LG14	tRNAscan-SE	tRNA	26952925	26952996	24.17	-	.	ID=tRNA_0094; Type=Pseudo; Anti-codon=CTA; structure=">>>.>>>..>.>>.......<<.<..>>.>.......<.<<......>...>.......<...<<<<.<<<.";
LG14	tRNAscan-SE	tRNA	27238146	27238220	24.13	+	.	ID=tRNA_0143; Type=Pseudo; Anti-codon=ATC; structure=">>>.>>.....>>>>.......<<<<...>>>.........<<<......>.>>>.......<<<.<.<<.<<<.";
LG14	tRNAscan-SE	tRNA	27811281	27811352	71.1	-	.	ID=tRNA_0093; Type=Asp; Anti-codon=GTC; structure=">>>>>>>..>>>>........<<<<.>>>>>.......<<<<<....>>>>>.......<<<<<<<<<<<<.";
LG14	tRNAscan-SE	tRNA	27818945	27819016	71.1	-	.	ID=tRNA_0092; Type=Asp; Anti-codon=GTC; structure=">>>>>>>..>>>>........<<<<.>>>>>.......<<<<<....>>>>>.......<<<<<<<<<<<<.";
LG14	tRNAscan-SE	tRNA	27820882	27820953	71.1	-	.	ID=tRNA_0091; Type=Asp; Anti-codon=GTC; structure=">>>>>>>..>>>>........<<<<.>>>>>.......<<<<<....>>>>>.......<<<<<<<<<<<<.";
LG14	tRNAscan-SE	tRNA	28075586	28075652	21.92	-	.	ID=tRNA_0090; Type=Pseudo; Anti-codon=???; structure=">.>>>>>..>>>>........<<<<.>>>>..........<<<<....>>.......<<<<<<<.<.";
LG14	tRNAscan-SE	tRNA	28547768	28547839	68.98	-	.	ID=tRNA_0151; Type=Met; Anti-codon=CAT; structure=">>>>>>>..>>>>.......<<<<.>>>>>.......<<<<<.....>>>>>.......<<<<<<<<<<<<.";
LG14	tRNAscan-SE	tRNA	28565371	28565443	82.67	+	.	ID=tRNA_0145; Type=Val; Anti-codon=TAC; structure=">>>>>>>..>>>..........<<<.>>>>>.......<<<<<.....>>>>>.......<<<<<<<<<<<<.";
LG14	tRNAscan-SE	tRNA	28565925	28565996	73.07	-	.	ID=tRNA_0150; Type=Ala; Anti-codon=CGC; structure=">>>>>>>..>>>>.......<<<<.>>>>>.......<<<<<.....>>>>>.......<<<<<<<<<<<<.";
LG14	tRNAscan-SE	tRNA	28575608	28575689	91.79	+	.	ID=tRNA_0146; Type=Ser; Anti-codon=TGA; structure=">>>>>>>..>>>..........<<<.>>>>>.......<<<<<.>>>>...<<<<..>>>>>.......<<<<<<<<<<<<.";
LG14	tRNAscan-SE	tRNA	28575942	28576013	68.98	-	.	ID=tRNA_0149; Type=Met; Anti-codon=CAT; structure=">>>>>>>..>>>>.......<<<<.>>>>>.......<<<<<.....>>>>>.......<<<<<<<<<<<<.";
LG14	tRNAscan-SE	tRNA	28577494	28577565	68.98	-	.	ID=tRNA_0144; Type=Met; Anti-codon=CAT; structure=">>>>>>>..>>>>.......<<<<.>>>>>.......<<<<<.....>>>>>.......<<<<<<<<<<<<.";
LG14	tRNAscan-SE	tRNA	28578064	28578135	68.98	-	.	ID=tRNA_0133; Type=Met; Anti-codon=CAT; structure=">>>>>>>..>>>>.......<<<<.>>>>>.......<<<<<.....>>>>>.......<<<<<<<<<<<<.";
LG14	tRNAscan-SE	tRNA	28637220	28637293	25.71	-	.	ID=tRNA_0122; Type=Pseudo; Anti-codon=CCC; structure=">.>.>.>..>>............<<.>>>...........<<<.....>>>>>.......<<<..<<<.<.<<.";
LG14	tRNAscan-SE	tRNA	28865794	28865865	72.92	-	.	ID=tRNA_0111; Type=Asp; Anti-codon=GTC; structure=">>>>>>>..>>>>........<<<<.>>>>>.......<<<<<....>>>>>.......<<<<<<<<<<<<.";
LG14	tRNAscan-SE	tRNA	28866125	28866197	87.39	+	.	ID=tRNA_0147; Type=Val; Anti-codon=CAC; structure=">>>>>>>..>>>..........<<<.>>>>>.......<<<<<.....>>>>>.......<<<<<<<<<<<<.";
LG14	tRNAscan-SE	tRNA	28866434	28866506	86.79	+	.	ID=tRNA_0148; Type=Val; Anti-codon=AAC; structure=">>>>>>>..>>>..........<<<.>>>>>.......<<<<<.....>>>>>.......<<<<<<<<<<<<.";
LG14	tRNAscan-SE	tRNA	28866668	28866740	87.39	-	.	ID=tRNA_0100; Type=Val; Anti-codon=CAC; structure=">>>>>>>..>>>..........<<<.>>>>>.......<<<<<.....>>>>>.......<<<<<<<<<<<<.";
LG14	tRNAscan-SE	tRNA	28873171	28873243	63.68	-	.	ID=tRNA_0089; Type=Ala; Anti-codon=AGC; structure=">>>>>>>..>>>>........<<<<.>>>>>.......<<<<<.....>>>>>.......<<<<<<<<<<<<.";
LG15	tRNAscan-SE	tRNA	229048	229119	20.86	-	.	ID=tRNA_0055; Type=Pseudo; Anti-codon=ATT; structure=">.>>..>..>>>>.......<<<<..>>>.........<<<......>.>>>.......<<<.<<..<<.<.";
LG15	tRNAscan-SE	tRNA	239386	239458	83.03	-	.	ID=tRNA_0054; Type=Thr; Anti-codon=TGT; structure=">>>>>>>..>>>>........<<<<.>>>>>.......<<<<<.....>>>>>.......<<<<<<<<<<<<.";
LG15	tRNAscan-SE	tRNA	259501	259573	27.62	+	.	ID=tRNA_0053; Type=Pseudo; Anti-codon=ACC; structure=">.>>..>..>>>>.......<<<<..>>>>.........<<<<.....>.>>.........<<.<<..<<.<.";
LG15	tRNAscan-SE	tRNA	1761860	1761929	21.23	-	.	ID=tRNA_0063; Type=Pseudo; Anti-codon=ACC; structure=">.>>..>..>>>>.......<<<<...>>>.........<<<...>>>>>.......<<<<<<..<<.<.";
LG15	tRNAscan-SE	tRNA	1807094	1807170	22.22	+	.	ID=tRNA_0056; Type=Pseudo; Anti-codon=CAT; structure=">>>.>>>..>>>>........<<<<.>.>>>.............<<<<.....>.>>.......<<.<.<<<.<<<.";
LG15	tRNAscan-SE	tRNA	1887489	1887560	21.81	-	.	ID=tRNA_0062; Type=Pseudo; Anti-codon=GTA; structure=">>>>>>>..>>.>........<.<<....>>.......<<.......>>>>>.......<<<<<<<<<<<<.";
LG15	tRNAscan-SE	tRNA	2019077	2019151	27.39	+	.	ID=tRNA_0057; Type=Pseudo; Anti-codon=CCC; structure=">>..>.>..>>.>........<.<<.>>>...........<<<.....>>>>>.......<<<..<<<.<..<<.";
LG15	tRNAscan-SE	tRNA	3437956	3438028	22.24	-	.	ID=tRNA_0061; Type=Pseudo; Anti-codon=ACC; structure=">.>>..>..>>>>.......<<<<...>>>.........<<<........>>>.......<<<..<..<<.<.";
LG15	tRNAscan-SE	tRNA	4023655	4023728	20.61	-	.	ID=tRNA_0060; Type=Pseudo; Anti-codon=ACC; structure=">>.>>..>..>>>>.......<<<<...>>>.........<<<......>.>>>.......<<<.<<.<<.<<.";
LG15	tRNAscan-SE	tRNA	4413369	4413443	20.77	-	.	ID=tRNA_0059; Type=Pseudo; Anti-codon=ACC; structure=">>>>>.>>>>>.......<<<<...>>>.........<<<......>.>>>.......<<<.<....<.<<<<<.";
LG15	tRNAscan-SE	tRNA	4592034	4592108	30.94	+	.	ID=tRNA_0058; Type=Pseudo; Anti-codon=CCC; structure=">>..>.>..>>............<<.>>>...........<<<.....>>>>>.......<<<..<<<.<..<<.";
LG15	tRNAscan-SE	tRNA	5498516	5498597	85.34	+	.	ID=tRNA_0169; Type=Ser; Anti-codon=GCT; structure=">>>>>>>..>>>..........<<<.>>>>>.......<<<<<.>>>>...<<<<..>>>>>.......<<<<<<<<<<<<.";
LG15	tRNAscan-SE	tRNA	6825006	6825075	20.04	-	.	ID=tRNA_0168; Type=Pseudo; Anti-codon=TCC; structure=">>>>>..>>.>........<.<<.>>>>>.......<<<<<....>...>.......<...<<<..<<<.";
LG15	tRNAscan-SE	tRNA	8673961	8674032	36.27	-	.	ID=tRNA_0167; Type=Pseudo; Anti-codon=AAG; structure=">>>>>>>..>>>.........<<<.>>.>.........<.<<.....>>>>.........<<<<<<<<<<<.";
LG15	tRNAscan-SE	tRNA	9767798	9767879	85.34	-	.	ID=tRNA_0166; Type=Ser; Anti-codon=GCT; structure=">>>>>>>..>>>..........<<<.>>>>>.......<<<<<.>>>>...<<<<..>>>>>.......<<<<<<<<<<<<.";
LG15	tRNAscan-SE	tRNA	11420418	11420491	64.87	+	.	ID=tRNA_0150; Type=Ile; Anti-codon=AAT; structure=">>.>.>>..>>>>.........<<<<.>>>>.........<<<<.....>>>>>.......<<<<<<<.<.<<.";
LG15	tRNAscan-SE	tRNA	11422719	11422789	46.62	-	.	ID=tRNA_0165; Type=Phe; Anti-codon=GAA; structure=">>>>>>>..>>>>........<<<<.>>>.......<..<<.....>>>.>.......<.<<<<<<<<<<.";
LG15	tRNAscan-SE	tRNA	11450464	11450537	34.19	+	.	ID=tRNA_0151; Type=Pseudo; Anti-codon=AAT; structure=">>>>.>>..>>>>.........<<<<.>.>>>.......<<<.<.....>>>>.........<<<<<<.<<<<.";
LG15	tRNAscan-SE	tRNA	19197475	19197547	83.8	+	.	ID=tRNA_0152; Type=Lys; Anti-codon=TTT; structure=">>>>>>>..>>>>........<<<<.>>>>>.......<<<<<.....>>>>>.......<<<<<<<<<<<<.";
LG15	tRNAscan-SE	tRNA	19389137	19389208	40.81	-	.	ID=tRNA_0164; Type=Glu; Anti-codon=TTC; structure=">>>>>>>..>>>>........<<<<.>>>>>.......<<<<<....>>>>>.......<<<<<<<<<<<<.";
LG15	tRNAscan-SE	tRNA	20029090	20029164	30.94	-	.	ID=tRNA_0163; Type=Pseudo; Anti-codon=CCC; structure=">>..>.>..>>............<<.>>>...........<<<.....>>>>>.......<<<..<<<.<..<<.";
LG15	tRNAscan-SE	tRNA	21827027	21827099	63.68	+	.	ID=tRNA_0153; Type=Ala; Anti-codon=AGC; structure=">>>>>>>..>>>>........<<<<.>>>>>.......<<<<<.....>>>>>.......<<<<<<<<<<<<.";
LG15	tRNAscan-SE	tRNA	21827774	21827846	63.68	+	.	ID=tRNA_0154; Type=Ala; Anti-codon=AGC; structure=">>>>>>>..>>>>........<<<<.>>>>>.......<<<<<.....>>>>>.......<<<<<<<<<<<<.";
LG15	tRNAscan-SE	tRNA	22033414	22033496	77.78	+	.	ID=tRNA_0155; Type=Leu; Anti-codon=TAA; structure=">>>>>>>..>>>..........<<<.>>>>>.......<<<<<..>>>>><<<<<...>>>>>.......<<<<<<<<<<<<.";
LG15	tRNAscan-SE	tRNA	22424149	22424231	77.82	+	.	ID=tRNA_0156; Type=Leu; Anti-codon=CAG; structure=">>>>>>>..>>>...........<<<.>>>>>.......<<<<<.>>>>...<<<<..>>>>>.......<<<<<<<<<<<<.";
LG15	tRNAscan-SE	tRNA	23835613	23835689	25.04	+	.	ID=tRNA_0157; Type=Pseudo; Anti-codon=ACC; structure=">>>>.>>..>>>>.......<<<<...>>>.........<<<......>>>.>...........<.<<<<<.<<<<.";
LG15	tRNAscan-SE	tRNA	23964292	23964363	72.63	+	.	ID=tRNA_0158; Type=Glu; Anti-codon=TTC; structure=">>>>>>>..>>>>........<<<<.>>>>>.......<<<<<....>>>>>.......<<<<<<<<<<<<.";
LG15	tRNAscan-SE	tRNA	25092377	25092449	20.42	+	.	ID=tRNA_0159; Type=Pseudo; Anti-codon=ACT; structure=">.>...>..>>>>.......<<<<...>>>.........<<<......>.>>>.......<<<.<<...<.<.";
LG15	tRNAscan-SE	tRNA	27051724	27051797	71.73	+	.	ID=tRNA_0161; Type=Thr; Anti-codon=TGT; structure=">>>>>>>..>>>>.........<<<<.>>>>>.......<<<<<.....>>>>>.......<<<<<<<<<<<<.";
LG15	tRNAscan-SE	tRNA	27052399	27052472	74.92	+	.	ID=tRNA_0162; Type=Thr; Anti-codon=TGT; structure=">>>>>>>..>>>>.........<<<<.>>>>>.......<<<<<.....>>>>>.......<<<<<<<<<<<<.";
LG15	tRNAscan-SE	tRNA	27921402	27921475	25.51	-	.	ID=tRNA_0160; Type=Pseudo; Anti-codon=ACC; structure=">>>..>>..>>>>.......<<<<...>>>.........<<<......>>>>>.......<<.<<<<<..<<<.";
LG15	tRNAscan-SE	tRNA	28183138	28183210	80.47	-	.	ID=tRNA_0149; Type=Lys; Anti-codon=CTT; structure=">>>>>>>..>>>>........<<<<.>>>>>.......<<<<<.....>>>>>.......<<<<<<<<<<<<.";
LG16	tRNAscan-SE	tRNA	1149753	1149827	30.94	-	.	ID=tRNA_0162; Type=Pseudo; Anti-codon=CCC; structure=">>..>.>..>>............<<.>>>...........<<<.....>>>>>.......<<<..<<<.<..<<.";
LG16	tRNAscan-SE	tRNA	1531806	1531877	21.9	+	.	ID=tRNA_0163; Type=Pseudo; Anti-codon=???; structure=">>>>>>>..>.>>.......<<.<..>>>>.........<<<<....>>>>>.......<<<<<<<<<<<<.";
LG16	tRNAscan-SE	tRNA	1730705	1730774	49.18	-	.	ID=tRNA_0161; Type=Asp; Anti-codon=GTC; structure=">>>.>>>..>>>>........<<<<.>>>>>.......<<<<<...>.>>>.......<<<.<<<<<<<.";
LG16	tRNAscan-SE	tRNA	1732631	1732701	60.56	-	.	ID=tRNA_0160; Type=Asp; Anti-codon=GTC; structure=">>>>>>>..>>>>........<<<<.>>>>>.......<<<<<...>.>>>.......<<<.<<<<<<<<.";
LG16	tRNAscan-SE	tRNA	1735808	1735876	38.43	-	.	ID=tRNA_0159; Type=Asp; Anti-codon=GTC; structure=">>>.>>>..>>>>........<<<<.>>>>>.......<<<<<....>>>>.......<<<<<<<<<<.";
LG16	tRNAscan-SE	tRNA	1738986	1739055	49.18	-	.	ID=tRNA_0158; Type=Asp; Anti-codon=GTC; structure=">>>.>>>..>>>>........<<<<.>>>>>.......<<<<<...>.>>>.......<<<.<<<<<<<.";
LG16	tRNAscan-SE	tRNA	1740464	1740535	68.93	-	.	ID=tRNA_0172; Type=Asp; Anti-codon=GTC; structure=">>>>>>>..>>>>........<<<<.>>>>>.......<<<<<....>>>>>.......<<<<<<<<<<<<.";
LG16	tRNAscan-SE	tRNA	1741938	1742009	68.93	-	.	ID=tRNA_0171; Type=Asp; Anti-codon=GTC; structure=">>>>>>>..>>>>........<<<<.>>>>>.......<<<<<....>>>>>.......<<<<<<<<<<<<.";
LG16	tRNAscan-SE	tRNA	1746360	1746431	68.93	-	.	ID=tRNA_0170; Type=Asp; Anti-codon=GTC; structure=">>>>>>>..>>>>........<<<<.>>>>>.......<<<<<....>>>>>.......<<<<<<<<<<<<.";
LG16	tRNAscan-SE	tRNA	1749543	1749614	68.93	-	.	ID=tRNA_0169; Type=Asp; Anti-codon=GTC; structure=">>>>>>>..>>>>........<<<<.>>>>>.......<<<<<....>>>>>.......<<<<<<<<<<<<.";
LG16	tRNAscan-SE	tRNA	1751022	1751093	68.93	-	.	ID=tRNA_0168; Type=Asp; Anti-codon=GTC; structure=">>>>>>>..>>>>........<<<<.>>>>>.......<<<<<....>>>>>.......<<<<<<<<<<<<.";
LG16	tRNAscan-SE	tRNA	1752499	1752570	68.93	-	.	ID=tRNA_0167; Type=Asp; Anti-codon=GTC; structure=">>>>>>>..>>>>........<<<<.>>>>>.......<<<<<....>>>>>.......<<<<<<<<<<<<.";
LG16	tRNAscan-SE	tRNA	1753493	1753564	68.93	-	.	ID=tRNA_0166; Type=Asp; Anti-codon=GTC; structure=">>>>>>>..>>>>........<<<<.>>>>>.......<<<<<....>>>>>.......<<<<<<<<<<<<.";
LG16	tRNAscan-SE	tRNA	1754489	1754560	52.92	-	.	ID=tRNA_0165; Type=Asp; Anti-codon=GTC; structure=">>>>>>>..>>>>........<<<<.>>>>.........<<<<....>>>>>.......<<<<<<<<<<<<.";
LG16	tRNAscan-SE	tRNA	1939753	1939823	28.54	-	.	ID=tRNA_0157; Type=Pseudo; Anti-codon=ACA; structure=">>...>>..>>>>.......<<<<..>.>>.......<<.<.....>>>>>.......<<<<<<<...<<.";
LG16	tRNAscan-SE	tRNA	3156885	3156957	24.35	+	.	ID=tRNA_0164; Type=Pseudo; Anti-codon=GAT; structure="..>..>....>>>........<<<..>>>>.........<<<<.....>>.>>.......<<.<<.<..<...";
LG16	tRNAscan-SE	tRNA	6678116	6678197	85.34	+	.	ID=tRNA_0282; Type=Ser; Anti-codon=GCT; structure=">>>>>>>..>>>..........<<<.>>>>>.......<<<<<.>>>>...<<<<..>>>>>.......<<<<<<<<<<<<.";
LG16	tRNAscan-SE	tRNA	9078802	9078874	83.03	-	.	ID=tRNA_0280; Type=Thr; Anti-codon=TGT; structure=">>>>>>>..>>>>........<<<<.>>>>>.......<<<<<.....>>>>>.......<<<<<<<<<<<<.";
LG16	tRNAscan-SE	tRNA	12252058	12252129	36.58	+	.	ID=tRNA_0283; Type=Asp; Anti-codon=GTC; structure=">>>>>>>..>>>>........<<<<.>>>>>.......<<<<<....>>>>.........<<<<<<<<<<<.";
LG16	tRNAscan-SE	tRNA	12252808	12252880	70.31	-	.	ID=tRNA_0279; Type=Val; Anti-codon=CAC; structure=">>>>>>>..>>>..........<<<.>>>>>.......<<<<<.....>>.>>.......<<.<<<<<<<<<.";
LG16	tRNAscan-SE	tRNA	12253958	12254030	78.99	-	.	ID=tRNA_0278; Type=Val; Anti-codon=AAC; structure=">>>>>>>..>>>..........<<<.>>>>>.......<<<<<.....>>>>>.......<<<<<<<<<<<<.";
LG16	tRNAscan-SE	tRNA	12255108	12255180	78.99	-	.	ID=tRNA_0277; Type=Val; Anti-codon=AAC; structure=">>>>>>>..>>>..........<<<.>>>>>.......<<<<<.....>>>>>.......<<<<<<<<<<<<.";
LG16	tRNAscan-SE	tRNA	12256256	12256328	79.59	-	.	ID=tRNA_0276; Type=Val; Anti-codon=CAC; structure=">>>>>>>..>>>..........<<<.>>>>>.......<<<<<.....>>>>>.......<<<<<<<<<<<<.";
LG16	tRNAscan-SE	tRNA	12257406	12257478	78.99	-	.	ID=tRNA_0275; Type=Val; Anti-codon=AAC; structure=">>>>>>>..>>>..........<<<.>>>>>.......<<<<<.....>>>>>.......<<<<<<<<<<<<.";
LG16	tRNAscan-SE	tRNA	12258555	12258627	78.99	-	.	ID=tRNA_0274; Type=Val; Anti-codon=AAC; structure=">>>>>>>..>>>..........<<<.>>>>>.......<<<<<.....>>>>>.......<<<<<<<<<<<<.";
LG16	tRNAscan-SE	tRNA	12259943	12260018	68.14	-	.	ID=tRNA_0273; Type=Val; Anti-codon=CAC; structure=">>>>>>>..>>>..........<<<.>>>>>.......<<<<<........>>>>>.......<<<<<<<<<<<<.";
LG16	tRNAscan-SE	tRNA	12261096	12261168	79.59	-	.	ID=tRNA_0272; Type=Val; Anti-codon=CAC; structure=">>>>>>>..>>>..........<<<.>>>>>.......<<<<<.....>>>>>.......<<<<<<<<<<<<.";
LG16	tRNAscan-SE	tRNA	12262247	12262319	71.56	-	.	ID=tRNA_0271; Type=Val; Anti-codon=AAC; structure=".>>>>>>..>>>..........<<<.>>>>>.......<<<<<.....>>>>>.......<<<<<<<<<<<..";
LG16	tRNAscan-SE	tRNA	12263679	12263751	79.59	-	.	ID=tRNA_0300; Type=Val; Anti-codon=CAC; structure=">>>>>>>..>>>..........<<<.>>>>>.......<<<<<.....>>>>>.......<<<<<<<<<<<<.";
LG16	tRNAscan-SE	tRNA	12264828	12264904	63.11	-	.	ID=tRNA_0299; Type=Undet; Anti-codon=???; structure=">>>>>>>..>>>..........<<<.>>>>>...........<<<<<.....>>>>>.......<<<<<<<<<<<<.";
LG16	tRNAscan-SE	tRNA	14962199	14962270	76.61	+	.	ID=tRNA_0284; Type=Glu; Anti-codon=CTC; structure=">>>>>>>..>>>>........<<<<.>>>>>.......<<<<<....>>>>>.......<<<<<<<<<<<<.";
LG16	tRNAscan-SE	tRNA	15026186	15026257	27.07	+	.	ID=tRNA_0285; Type=Pseudo; Anti-codon=ACC; structure=".>>>>....>>>>.......<<<<...>>>>.......<<<<........>>>.......<<<...<<<<..";
LG16	tRNAscan-SE	tRNA	15035705	15035776	27.07	+	.	ID=tRNA_0286; Type=Pseudo; Anti-codon=ACC; structure=".>>>>....>>>>.......<<<<...>>>>.......<<<<........>>>.......<<<...<<<<..";
LG16	tRNAscan-SE	tRNA	15703190	15703265	23.06	-	.	ID=tRNA_0298; Type=Pseudo; Anti-codon=CCC; structure=">>..>.>..>>.>........<.<<.>>>...........<<<......>>>>>.......<<<..<<<.<..<<.";
LG16	tRNAscan-SE	tRNA	16812501	16812583	80.77	-	.	ID=tRNA_0297; Type=Leu; Anti-codon=TAA; structure=">>>>>>>..>>>..........<<<.>>>>>.......<<<<<.>>>>....<<<<..>>>>>.......<<<<<<<<<<<<.";
LG16	tRNAscan-SE	tRNA	19686458	19686540	22.66	-	.	ID=tRNA_0296; Type=Pseudo; Anti-codon=CCC; structure=">>..>.>..>>............<<.>>>...........<<<...>>><<<....>>>>>.......<<<..<<<.<..<<.";
LG16	tRNAscan-SE	tRNA	22441439	22441534	76.22	+	.	ID=tRNA_0287; Type=Tyr; Anti-codon=GTA; structure=">>>>>>>..>>>>........<<<<.>>>>>..............................<<<<<.....>>>>>.......<<<<<<<<<<<<.";
LG16	tRNAscan-SE	tRNA	22442052	22442124	63.68	+	.	ID=tRNA_0288; Type=Ala; Anti-codon=AGC; structure=">>>>>>>..>>>>........<<<<.>>>>>.......<<<<<.....>>>>>.......<<<<<<<<<<<<.";
LG16	tRNAscan-SE	tRNA	22442617	22442705	76.94	-	.	ID=tRNA_0295; Type=Tyr; Anti-codon=GTA; structure=">>>>>>>..>>>>........<<<<.>>>>>.......................<<<<<.....>>>>>.......<<<<<<<<<<<<.";
LG16	tRNAscan-SE	tRNA	22444983	22445071	76.8	+	.	ID=tRNA_0289; Type=Tyr; Anti-codon=GTA; structure=">>>>>>>..>>>>........<<<<.>>>>>.......................<<<<<.....>>>>>.......<<<<<<<<<<<<.";
LG16	tRNAscan-SE	tRNA	22446475	22446546	43.26	-	.	ID=tRNA_0292; Type=Ala; Anti-codon=AGC; structure=".>>>>>>..>>>>........<<<<.>>>>.......<<<.<.....>>>>>.......<<<<<<<<<<<..";
LG16	tRNAscan-SE	tRNA	22447822	22447910	76.8	+	.	ID=tRNA_0290; Type=Tyr; Anti-codon=GTA; structure=">>>>>>>..>>>>........<<<<.>>>>>.......................<<<<<.....>>>>>.......<<<<<<<<<<<<.";
LG16	tRNAscan-SE	tRNA	22449304	22449376	63.68	-	.	ID=tRNA_0281; Type=Ala; Anti-codon=AGC; structure=">>>>>>>..>>>>........<<<<.>>>>>.......<<<<<.....>>>>>.......<<<<<<<<<<<<.";
LG16	tRNAscan-SE	tRNA	22450653	22450741	76.8	+	.	ID=tRNA_0291; Type=Tyr; Anti-codon=GTA; structure=">>>>>>>..>>>>........<<<<.>>>>>.......................<<<<<.....>>>>>.......<<<<<<<<<<<<.";
LG16	tRNAscan-SE	tRNA	22450957	22451029	56.69	-	.	ID=tRNA_0270; Type=Ala; Anti-codon=AGC; structure=">>>>>>>..>>>>........<<<<.>>>>>.......<<<<<.....>>.>>.......<<.<<<<<<<<<.";
LG16	tRNAscan-SE	tRNA	22452305	22452400	76.22	+	.	ID=tRNA_0293; Type=Tyr; Anti-codon=GTA; structure=">>>>>>>..>>>>........<<<<.>>>>>..............................<<<<<.....>>>>>.......<<<<<<<<<<<<.";
LG16	tRNAscan-SE	tRNA	22452913	22452984	50.22	+	.	ID=tRNA_0294; Type=Ala; Anti-codon=AGC; structure=">>>>>>>..>>>>........<<<<.>>>>>.......<<<<<.....>>>>.......<<.<<<<<<<<<.";
LG16	tRNAscan-SE	tRNA	22454718	22454790	63.68	-	.	ID=tRNA_0011; Type=Ala; Anti-codon=AGC; structure=">>>>>>>..>>>>........<<<<.>>>>>.......<<<<<.....>>>>>.......<<<<<<<<<<<<.";
LG16	tRNAscan-SE	tRNA	22455342	22455430	76.8	-	.	ID=tRNA_0010; Type=Tyr; Anti-codon=GTA; structure=">>>>>>>..>>>>........<<<<.>>>>>.......................<<<<<.....>>>>>.......<<<<<<<<<<<<.";
LG16	tRNAscan-SE	tRNA	22455662	22455734	63.68	+	.	ID=tRNA_0005; Type=Ala; Anti-codon=AGC; structure=">>>>>>>..>>>>........<<<<.>>>>>.......<<<<<.....>>>>>.......<<<<<<<<<<<<.";
LG16	tRNAscan-SE	tRNA	22879280	22879349	20.52	-	.	ID=tRNA_0009; Type=Pseudo; Anti-codon=???; structure=">.>>..>..>>>>.......<<<<...>>>......<<<......>.>>>.......<<<.<<..<<.<.";
LG16	tRNAscan-SE	tRNA	23887560	23887642	77.82	+	.	ID=tRNA_0006; Type=Leu; Anti-codon=CAG; structure=">>>>>>>..>>>...........<<<.>>>>>.......<<<<<.>>>>...<<<<..>>>>>.......<<<<<<<<<<<<.";
LG16	tRNAscan-SE	tRNA	24233281	24233352	72.71	-	.	ID=tRNA_0008; Type=Ala; Anti-codon=TGC; structure=">>>>>>>..>>>>.......<<<<.>>>>>.......<<<<<.....>>>>>.......<<<<<<<<<<<<.";
LG16	tRNAscan-SE	tRNA	24944748	24944820	81.27	+	.	ID=tRNA_0007; Type=Thr; Anti-codon=TGT; structure=">>>>>>>..>>>>........<<<<.>>>>>.......<<<<<.....>>>>>.......<<<<<<<<<<<<.";
LG16	tRNAscan-SE	tRNA	28076836	28076907	69.89	-	.	ID=tRNA_0148; Type=Glu; Anti-codon=TTC; structure=".>>>>>>..>>>>........<<<<.>>>>>.......<<<<<....>>>>>.......<<<<<<<<<<<..";
LG16	tRNAscan-SE	tRNA	28079239	28079309	57.77	-	.	ID=tRNA_0147; Type=Glu; Anti-codon=TTC; structure=">>>>>>>..>>>>........<<<<.>>>>>.......<<<<<....>.>>>.......<<<<<<<<<<<.";
LG16	tRNAscan-SE	tRNA	28081679	28081750	79.24	-	.	ID=tRNA_0146; Type=Glu; Anti-codon=TTC; structure=">>>>>>>..>>>>........<<<<.>>>>>.......<<<<<....>>>>>.......<<<<<<<<<<<<.";
LG16	tRNAscan-SE	tRNA	28084114	28084185	67.01	-	.	ID=tRNA_0145; Type=Glu; Anti-codon=TTC; structure=">>>>>>>..>>>>........<<<<.>>>>>.......<<<<<....>>>>>.......<<<<<<<<<<<<.";
LG16	tRNAscan-SE	tRNA	28086531	28086602	79.24	-	.	ID=tRNA_0144; Type=Glu; Anti-codon=TTC; structure=">>>>>>>..>>>>........<<<<.>>>>>.......<<<<<....>>>>>.......<<<<<<<<<<<<.";
LG16	tRNAscan-SE	tRNA	28088941	28089011	65.78	-	.	ID=tRNA_0143; Type=Glu; Anti-codon=TTC; structure=">>>>>>>..>>>>........<<<<.>>>>>.......<<<<<....>>>>.......<<.<<<<<<<<<.";
LG16	tRNAscan-SE	tRNA	28091366	28091437	71.31	-	.	ID=tRNA_0142; Type=Glu; Anti-codon=TTC; structure=">>>>>>>..>>>>........<<<<.>>>>>.......<<<<<....>>>>>.......<<<<<<<<<<<<.";
LG16	tRNAscan-SE	tRNA	28094258	28094329	71.31	-	.	ID=tRNA_0141; Type=Glu; Anti-codon=TTC; structure=">>>>>>>..>>>>........<<<<.>>>>>.......<<<<<....>>>>>.......<<<<<<<<<<<<.";
LG17	tRNAscan-SE	tRNA	2923300	2923382	22.15	+	.	ID=tRNA_0119; Type=Pseudo; Anti-codon=CCC; structure=">>..>.>..>>............<<.>>>...........<<<...>>><<<....>>>>>.......<<<..<<<.<..<<.";
LG17	tRNAscan-SE	tRNA	9840688	9840760	80.47	-	.	ID=tRNA_0081; Type=Lys; Anti-codon=CTT; structure=">>>>>>>..>>>>........<<<<.>>>>>.......<<<<<.....>>>>>.......<<<<<<<<<<<<.";
LG17	tRNAscan-SE	tRNA	11035701	11035775	27.39	-	.	ID=tRNA_0102; Type=Pseudo; Anti-codon=CCC; structure=">>..>.>..>>.>........<.<<.>>>...........<<<.....>>>>>.......<<<..<<<.<..<<.";
LG17	tRNAscan-SE	tRNA	12073154	12073225	62.77	+	.	ID=tRNA_0082; Type=His; Anti-codon=GTG; structure=">>>>>>>..>>>>........<<<<.>>>>>.......<<<<<....>>>>>.......<<<<<<<<<<<<.";
LG17	tRNAscan-SE	tRNA	12073886	12073957	66.12	+	.	ID=tRNA_0083; Type=His; Anti-codon=GTG; structure=">>>>>>>..>>>>........<<<<.>>>>>.......<<<<<....>>>>>.......<<<<<<<<<<<<.";
LG17	tRNAscan-SE	tRNA	12074373	12074444	66.12	+	.	ID=tRNA_0084; Type=His; Anti-codon=GTG; structure=">>>>>>>..>>>>........<<<<.>>>>>.......<<<<<....>>>>>.......<<<<<<<<<<<<.";
LG17	tRNAscan-SE	tRNA	12144840	12144912	87.39	-	.	ID=tRNA_0101; Type=Val; Anti-codon=CAC; structure=">>>>>>>..>>>..........<<<.>>>>>.......<<<<<.....>>>>>.......<<<<<<<<<<<<.";
LG17	tRNAscan-SE	tRNA	12161745	12161816	66.12	-	.	ID=tRNA_0100; Type=His; Anti-codon=GTG; structure=">>>>>>>..>>>>........<<<<.>>>>>.......<<<<<....>>>>>.......<<<<<<<<<<<<.";
LG17	tRNAscan-SE	tRNA	12162670	12162741	66.12	-	.	ID=tRNA_0099; Type=His; Anti-codon=GTG; structure=">>>>>>>..>>>>........<<<<.>>>>>.......<<<<<....>>>>>.......<<<<<<<<<<<<.";
LG17	tRNAscan-SE	tRNA	14277306	14277377	64.56	-	.	ID=tRNA_0098; Type=Thr; Anti-codon=CGT; structure=">>>>>>>..>>>.........<<<.>.>>>.......<<<.<.....>>>.>.......<.<<<<<<<<<<.";
LG17	tRNAscan-SE	tRNA	14641556	14641630	24.12	+	.	ID=tRNA_0085; Type=Pseudo; Anti-codon=???; structure=">>>.>>.....>>>.........<<<...>>.>>......<<.<<.....>.>>>.......<<<.<.<<.<<<.";
LG17	tRNAscan-SE	tRNA	14969547	14969618	22.9	-	.	ID=tRNA_0097; Type=Pseudo; Anti-codon=ACC; structure=">.>>..>..>>>>.......<<<<...>>>.........<<<.....>.>.>.......<.<.<<..<<.<.";
LG17	tRNAscan-SE	tRNA	16384329	16384402	30.59	-	.	ID=tRNA_0096; Type=Pseudo; Anti-codon=TTC; structure=".>>>.>..>>>>........<<<<.>>>>>.......<<<<<....>>>>>.......<<<<<....<.<<<..";
LG17	tRNAscan-SE	tRNA	17546657	17546729	22.15	+	.	ID=tRNA_0086; Type=Pseudo; Anti-codon=ACC; structure=">.>...>..>>>>.......<<<<...>>>.........<<<......>.>.>.......<.<.<<...<.<.";
LG17	tRNAscan-SE	tRNA	18895572	18895643	55.93	+	.	ID=tRNA_0087; Type=Glu; Anti-codon=CTC; structure=">>>>>>>..>>>>........<<<<.>>>.>.......<.<<<....>>>>>.......<<<<<<<<<<<<.";
LG17	tRNAscan-SE	tRNA	21649617	21649691	30.94	-	.	ID=tRNA_0091; Type=Pseudo; Anti-codon=CCC; structure=">>..>.>..>>............<<.>>>...........<<<.....>>>>>.......<<<..<<<.<..<<.";
LG17	tRNAscan-SE	tRNA	23466591	23466670	29.06	+	.	ID=tRNA_0088; Type=Pseudo; Anti-codon=CCC; structure=">>>.>>>..>>.>........<.<<.>>>...........<<<...>>><<<.....>>>>.......<<<<.<<<<<<.";
LG17	tRNAscan-SE	tRNA	23761261	23761333	26.44	+	.	ID=tRNA_0089; Type=Pseudo; Anti-codon=ACA; structure=">>>>..>..>>>>.......<<<<...>>>.........<<<......>.>>>.......<<<.<<..<<<<.";
LG17	tRNAscan-SE	tRNA	25540288	25540359	25.03	+	.	ID=tRNA_0090; Type=Pseudo; Anti-codon=TTC; structure=">.>>.>>..>.>..........<.<.>..>.........<..<......>>>.......<<<..<<.<<.<.";
LG17	tRNAscan-SE	tRNA	27176731	27176804	20.27	+	.	ID=tRNA_0092; Type=Pseudo; Anti-codon=ACC; structure=">>>..>>..>>>>.......<<<<...>.>.........<.<......>>>>>.......<<<<.<<<..<<<.";
LG17	tRNAscan-SE	tRNA	27233010	27233093	20.22	+	.	ID=tRNA_0093; Type=Pseudo; Anti-codon=CCC; structure=">>..>.>..>>.>........<.<<.>>>...........<<<...>>><<<.....>>>>>.......<<<..<<<.<..<<.";
LG17	tRNAscan-SE	tRNA	27327571	27327641	20.01	+	.	ID=tRNA_0094; Type=Pseudo; Anti-codon=GGG; structure=">>>>>..>.>>........<<.<..>.>.........<.<......>>>>>.......<<<<<<<..<<<.";
LG17	tRNAscan-SE	tRNA	27569447	27569521	21.7	-	.	ID=tRNA_0080; Type=Pseudo; Anti-codon=ACT; structure=">>>.>>.....>>>>.......<<<<...>>>.........<<<......>.>.>.......<.<.<.<<.<<<.";
LG17	tRNAscan-SE	tRNA	27924248	27924320	26.08	+	.	ID=tRNA_0095; Type=Pseudo; Anti-codon=ACT; structure=">.>>..>..>>>>.......<<<<...>>>.........<<<......>.>>>.......<<<.<<..<<.<.";
LG18	tRNAscan-SE	tRNA	417336	417410	31.8	-	.	ID=tRNA_0147; Type=Pseudo; Anti-codon=CCC; structure=">>..>.>..>>............<<.>>>...........<<<.....>>>>>.......<<<<..<<.<..<<.";
LG18	tRNAscan-SE	tRNA	420600	420674	31.8	-	.	ID=tRNA_0146; Type=Pseudo; Anti-codon=CCC; structure=">>..>.>..>>............<<.>>>...........<<<.....>>>>>.......<<<<..<<.<..<<.";
LG18	tRNAscan-SE	tRNA	768853	768924	46.68	+	.	ID=tRNA_0148; Type=Pseudo; Anti-codon=TCC; structure=".>>>.>>..>>>>........<<<<.>>>>.........<<<<....>>.>>.......<<.<<<<.<<<..";
LG18	tRNAscan-SE	tRNA	946634	946716	20.76	-	.	ID=tRNA_0145; Type=Pseudo; Anti-codon=CCC; structure=">>..>.>..>>............<<.>>>...........<<<...>>><<<....>>>>>.......<<<..<<<.<..<<.";
LG18	tRNAscan-SE	tRNA	11426406	11426480	27.39	-	.	ID=tRNA_0144; Type=Pseudo; Anti-codon=CCC; structure=">>..>.>..>>.>........<.<<.>>>...........<<<.....>>>>>.......<<<..<<<.<..<<.";
LG18	tRNAscan-SE	tRNA	12445116	12445187	73.59	-	.	ID=tRNA_0143; Type=Cys; Anti-codon=GCA; structure=">>>>>>>..>>>>.......<<<<.>>>>>.......<<<<<.....>>>>>.......<<<<<<<<<<<<.";
LG18	tRNAscan-SE	tRNA	20233883	20233957	24.85	-	.	ID=tRNA_0142; Type=Pseudo; Anti-codon=CCC; structure=">>..>.>..>>............<<.>>>...........<<<.....>>>>>.......<<<..<<<.<..<<.";
LG18	tRNAscan-SE	tRNA	22172425	22172501	25.22	-	.	ID=tRNA_0141; Type=Pseudo; Anti-codon=AGT; structure=">>>>.....>>>>........<<<<..>>>.........<<<.......>>>>...........<<<<....<<<<.";
LG18	tRNAscan-SE	tRNA	22699122	22699196	23.37	+	.	ID=tRNA_0138; Type=Pseudo; Anti-codon=ACT; structure=">>>>>.>..>>>>........<<<<..>>.>.........<<<......>>.>>.......<<.<<<.<<<.<<.";
LG18	tRNAscan-SE	tRNA	23223029	23223108	21.77	-	.	ID=tRNA_0137; Type=Pseudo; Anti-codon=ACC; structure=">>>>>....>>>>.......<<<<...>>>.........<<<......>>.>>..............<<.<<..<<<<<.";
LG18	tRNAscan-SE	tRNA	24314293	24314349	20.39	+	.	ID=tRNA_0139; Type=Ser; Anti-codon=CGA; structure=">>>..>>..>>>>.......<<<<........>>>>>.......<<<<<<<..<<<.";
LG18	tRNAscan-SE	tRNA	24457095	24457167	28.87	+	.	ID=tRNA_0140; Type=Pseudo; Anti-codon=ACC; structure=">>>..>>..>>>>.......<<<<...>>>>.......<<<<......>>>.>.......<.<<<<<..<<<.";
LG18	tRNAscan-SE	tRNA	25783481	25783553	20.41	+	.	ID=tRNA_0033; Type=Pseudo; Anti-codon=TCC; structure=">.>...>..>>>>.......<<<<...>>>.........<<<......>.>>>.......<<<.<<...<.<.";
LG18	tRNAscan-SE	tRNA	26166706	26166780	34.86	-	.	ID=tRNA_0032; Type=Pseudo; Anti-codon=CCC; structure=">>..>.>..>>............<<.>>>...........<<<.....>>>>>.......<<<..<<<.<..<<.";
LG18	tRNAscan-SE	tRNA	26267612	26267685	21.8	+	.	ID=tRNA_0034; Type=Pseudo; Anti-codon=ACC; structure=">>>...>>...>>>>.......<<<<...>>>.........<<<......>>.>>.......<<.<<.<<<<<.";
LG18	tRNAscan-SE	tRNA	28276426	28276498	21.3	-	.	ID=tRNA_0031; Type=Pseudo; Anti-codon=ACC; structure=">.>>..>..>>>>.......<<<<...>>>.........<.<<.....>.>>>.......<<<.<<..<<.<.";
LG19	tRNAscan-SE	tRNA	104757	104829	28.86	-	.	ID=tRNA_0123; Type=Pseudo; Anti-codon=ACC; structure=">.>>..>..>>>>.......<<<<..>>>>.........<<<<.....>.>>>.......<<<.<<..<<.<.";
LG19	tRNAscan-SE	tRNA	2834235	2834306	70.85	+	.	ID=tRNA_0020; Type=Trp; Anti-codon=CCA; structure=">>>>>>>..>>.>.......<.<<.>>>>>.......<<<<<.....>>>>>.......<<<<<<<<<<<<.";
LG19	tRNAscan-SE	tRNA	4065266	4065337	20.62	-	.	ID=tRNA_0021; Type=Pseudo; Anti-codon=ACC; structure=">>>.>>...>>>>.......<<<<...>>>.........<<<......>.>>>.......<<<.<.<<<<<.";
LG19	tRNAscan-SE	tRNA	5649722	5649793	25.25	-	.	ID=tRNA_0180; Type=Gly; Anti-codon=ACC; structure=">>>>>..>>>>.......<<<<...>>>.........<<<......>>>.>.......<.<<<<<...<<<.";
LG19	tRNAscan-SE	tRNA	6737705	6737775	52.16	-	.	ID=tRNA_0179; Type=Gly; Anti-codon=TCC; structure=".>>>>>>..>>.>........<.<<.>>>>>.......<<<<<....>>>>.......<<.<<<<<<<<..";
LG19	tRNAscan-SE	tRNA	6739621	6739692	66.06	-	.	ID=tRNA_0178; Type=Gly; Anti-codon=TCC; structure=">>>>>>>..>>.>........<.<<.>>>>>.......<<<<<....>>>>>.......<<<<<<<<<<<<.";
LG19	tRNAscan-SE	tRNA	6743995	6744066	68.74	-	.	ID=tRNA_0177; Type=Gly; Anti-codon=TCC; structure=">>>>>>>..>>.>........<.<<.>>>>>.......<<<<<....>>>>>.......<<<<<<<<<<<<.";
LG19	tRNAscan-SE	tRNA	6745910	6745981	65.46	-	.	ID=tRNA_0176; Type=Gly; Anti-codon=TCC; structure=">>>>>>>..>>.>........<.<<.>>>.>.......<.<<<....>>>>>.......<<<<<<<<<<<<.";
LG19	tRNAscan-SE	tRNA	6960704	6960775	24.4	+	.	ID=tRNA_0173; Type=Tyr; Anti-codon=ATA; structure=">>.>>.>..>>.>.......<.<<.>>>>..........<<<<....>>>>>.......<<<<<<.<<.<<.";
LG19	tRNAscan-SE	tRNA	7872350	7872421	74	+	.	ID=tRNA_0181; Type=Trp; Anti-codon=CCA; structure=">>>>>>>..>>>>.......<<<<.>>>>>.......<<<<<.....>>>>>.......<<<<<<<<<<<<.";
LG19	tRNAscan-SE	tRNA	7879836	7879907	74	+	.	ID=tRNA_0182; Type=Trp; Anti-codon=CCA; structure=">>>>>>>..>>>>.......<<<<.>>>>>.......<<<<<.....>>>>>.......<<<<<<<<<<<<.";
LG19	tRNAscan-SE	tRNA	7922409	7922480	74	-	.	ID=tRNA_0175; Type=Trp; Anti-codon=CCA; structure=">>>>>>>..>>>>.......<<<<.>>>>>.......<<<<<.....>>>>>.......<<<<<<<<<<<<.";
LG19	tRNAscan-SE	tRNA	8226684	8226754	21.26	-	.	ID=tRNA_0174; Type=Gly; Anti-codon=TCC; structure=">>>>>.>...>>.>........<.<<.>>>.>.......<.<<<....>>..>.......<<<<.<<<<<.";
LG19	tRNAscan-SE	tRNA	8227161	8227242	86.03	-	.	ID=tRNA_0188; Type=Ser; Anti-codon=AGA; structure=">>>>>>>..>>>..........<<<.>>>>>.......<<<<<.>>>>...<<<<..>>>>>.......<<<<<<<<<<<<.";
LG19	tRNAscan-SE	tRNA	8227904	8227975	37.29	-	.	ID=tRNA_0187; Type=Phe; Anti-codon=AAA; structure=">>>.>.>..>>>.........<<<.>>..>.......<..<<.....>>>>>.......<<<<<<.<.<<<.";
LG19	tRNAscan-SE	tRNA	10217923	10217994	72.81	+	.	ID=tRNA_0183; Type=Gly; Anti-codon=TCC; structure=">>>>>>>..>>.>........<.<<.>>>>>.......<<<<<....>>>>>.......<<<<<<<<<<<<.";
LG19	tRNAscan-SE	tRNA	10270288	10270359	77.71	+	.	ID=tRNA_0184; Type=Cys; Anti-codon=GCA; structure=">>>>>>>..>>>>.......<<<<.>>>>>.......<<<<<.....>>>>>.......<<<<<<<<<<<<.";
LG19	tRNAscan-SE	tRNA	10434858	10434929	29.52	-	.	ID=tRNA_0186; Type=Gly; Anti-codon=TCC; structure=">>>>>>>..>>.>........<.<<..>>.>.......<.<<......>.>>.......<<.<.<<<<<<<.";
LG19	tRNAscan-SE	tRNA	10436002	10436073	58.48	-	.	ID=tRNA_0185; Type=Gly; Anti-codon=TCC; structure=">>>>>>>..>>.>........<.<<.>>>.>.......<.<<<....>>>>>.......<<<<<<<<<<<<.";
LG19	tRNAscan-SE	tRNA	10437617	10437688	66.06	-	.	ID=tRNA_0020; Type=Gly; Anti-codon=TCC; structure=">>>>>>>..>>.>........<.<<.>>>>>.......<<<<<....>>>>>.......<<<<<<<<<<<<.";
LG19	tRNAscan-SE	tRNA	10438853	10438934	86.51	-	.	ID=tRNA_0019; Type=Ser; Anti-codon=AGA; structure=">>>>>>>..>>>..........<<<.>>>>>.......<<<<<.>>>>...<<<<..>>>>>.......<<<<<<<<<<<<.";
LG19	tRNAscan-SE	tRNA	10440351	10440422	66.06	-	.	ID=tRNA_0018; Type=Gly; Anti-codon=TCC; structure=">>>>>>>..>>.>........<.<<.>>>>>.......<<<<<....>>>>>.......<<<<<<<<<<<<.";
LG19	tRNAscan-SE	tRNA	10441587	10441669	63.77	-	.	ID=tRNA_0017; Type=Ser; Anti-codon=AGA; structure=">>>>>>>..>>>..........<<<.>>>>>.......<<<<<.>>>>...<<<<..>>...>.......<..<<<<<<<<<.";
LG19	tRNAscan-SE	tRNA	10578053	10578134	62.54	-	.	ID=tRNA_0016; Type=Ser; Anti-codon=AGA; structure=">>>>>>>..>>>..........<<<.>>>>>.......<<<<<.>>>>...<<<<...>>>>.......<<<<.<<<<<<<.";
LG19	tRNAscan-SE	tRNA	10579121	10579192	73.04	-	.	ID=tRNA_0015; Type=Gly; Anti-codon=TCC; structure=">>>>>>>..>>.>........<.<<.>>>>>.......<<<<<....>>>>>.......<<<<<<<<<<<<.";
LG19	tRNAscan-SE	tRNA	10595856	10595937	69.12	-	.	ID=tRNA_0014; Type=Ser; Anti-codon=AGA; structure=">>>>>>>..>>>..........<<<.>>>>>.......<<<<<.>>>>...<<<<..>>>>>.......<<<<<<<<<<<<.";
LG19	tRNAscan-SE	tRNA	10597175	10597246	73.04	-	.	ID=tRNA_0013; Type=Gly; Anti-codon=TCC; structure=">>>>>>>..>>.>........<.<<.>>>>>.......<<<<<....>>>>>.......<<<<<<<<<<<<.";
LG19	tRNAscan-SE	tRNA	11571547	11571637	21.76	-	.	ID=tRNA_0011; Type=Pseudo; Anti-codon=CAT; structure=">>>>>.>..>>>>........<<<<.>.>>>...........................<<<<.....>.>>.......<<.<.<.<<<<<.";
LG19	tRNAscan-SE	tRNA	12118005	12118086	69.54	+	.	ID=tRNA_0001; Type=Leu; Anti-codon=TAG; structure=">>.>>>>..>>>...........<<<.>>>>>.......<<<<<.>>>....<<<..>>>>>.......<<<<<<<<<.<<.";
LG19	tRNAscan-SE	tRNA	12742366	12742457	68.85	+	.	ID=tRNA_0012; Type=Arg; Anti-codon=TCT; structure=">>>>>>>..>>>>........<<<<.>>>>>..........................<<<<<.....>>>>>.......<<<<<<<<<<<<.";
LG19	tRNAscan-SE	tRNA	13117034	13117106	67.8	-	.	ID=tRNA_0010; Type=Arg; Anti-codon=CCG; structure=">>>>>>>..>>>>........<<<<.>>>>>.......<<<<<.....>>>>>.......<<<<<<<<<<<<.";
LG19	tRNAscan-SE	tRNA	13421969	13422042	84.06	+	.	ID=tRNA_0021; Type=Thr; Anti-codon=AGT; structure=">>>>>>>..>>>>.........<<<<.>>>>>.......<<<<<.....>>>>>.......<<<<<<<<<<<<.";
LG19	tRNAscan-SE	tRNA	15126722	15126794	63.06	-	.	ID=tRNA_0009; Type=Ala; Anti-codon=AGC; structure=">>>>>>>..>>>>........<<<<.>>>>>.......<<<<<.....>>>>>.......<<<<<<<<<<<<.";
LG19	tRNAscan-SE	tRNA	15127209	15127294	77.22	+	.	ID=tRNA_0022; Type=Tyr; Anti-codon=GTA; structure=">>>>>>>..>>>>........<<<<.>>>>>....................<<<<<.....>>>>>.......<<<<<<<<<<<<.";
LG19	tRNAscan-SE	tRNA	17939377	17939449	66.11	-	.	ID=tRNA_0008; Type=Arg; Anti-codon=CCG; structure=">>>>>>>..>>>>........<<<<.>>>>>.......<<<<<.....>>>>>.......<<<<<<<<<<<<.";
LG19	tRNAscan-SE	tRNA	18748850	18748924	27.39	-	.	ID=tRNA_0007; Type=Pseudo; Anti-codon=CCC; structure=">>..>.>..>>.>........<.<<.>>>...........<<<.....>>>>>.......<<<..<<<.<..<<.";
LG19	tRNAscan-SE	tRNA	22859187	22859256	22.32	-	.	ID=tRNA_0006; Type=Pseudo; Anti-codon=???; structure=">.>>..>..>>>..........<<<..>>.>....<.<<......>.>>>.......<<<.<<..<<.<.";
LG19	tRNAscan-SE	tRNA	23018141	23018212	32.15	+	.	ID=tRNA_0023; Type=Pro; Anti-codon=TGG; structure=">>..>>>..>.>>........<<.<.>>>.>.......<.<<<....>.>>>.......<<<.<<<<..<<.";
LG19	tRNAscan-SE	tRNA	23019075	23019146	50.32	+	.	ID=tRNA_0024; Type=Glu; Anti-codon=TTC; structure=">>>>>.>..>>>>........<<<<.>>>>>.......<<<<<....>>>.>.......<.<<<<.<<<<<.";
LG19	tRNAscan-SE	tRNA	23639839	23639913	33.39	+	.	ID=tRNA_0025; Type=Pseudo; Anti-codon=CCC; structure=">>..>.>..>>............<<.>>>...........<<<.....>>>>>.......<<<..<<<.<..<<.";
LG19	tRNAscan-SE	tRNA	24252918	24252990	23.13	+	.	ID=tRNA_0026; Type=Pseudo; Anti-codon=ACC; structure=">.>>>.>..>>>>.......<<<<...>>>.........<.<<.....>.>>>.......<<<.<<.<<<.<.";
LG19	tRNAscan-SE	tRNA	24697972	24698045	80.66	-	.	ID=tRNA_0005; Type=Ile; Anti-codon=AAT; structure=">>>>.>>..>>>>.........<<<<.>>>>>.......<<<<<.....>>>>>.......<<<<<<<.<<<<.";
LG19	tRNAscan-SE	tRNA	24699167	24699240	74.75	-	.	ID=tRNA_0004; Type=Ile; Anti-codon=AAT; structure=">>>>..>..>>>>.........<<<<.>>>>>.......<<<<<.....>>>>>.......<<<<<<..<<<<.";
LG19	tRNAscan-SE	tRNA	24701360	24701433	80.66	-	.	ID=tRNA_0003; Type=Ile; Anti-codon=AAT; structure=">>>>.>>..>>>>.........<<<<.>>>>>.......<<<<<.....>>>>>.......<<<<<<<.<<<<.";
LG19	tRNAscan-SE	tRNA	24704461	24704534	80.66	-	.	ID=tRNA_0002; Type=Ile; Anti-codon=AAT; structure=">>>>.>>..>>>>.........<<<<.>>>>>.......<<<<<.....>>>>>.......<<<<<<<.<<<<.";
LG19	tRNAscan-SE	tRNA	24706203	24706276	80.66	-	.	ID=tRNA_0027; Type=Ile; Anti-codon=AAT; structure=">>>>.>>..>>>>.........<<<<.>>>>>.......<<<<<.....>>>>>.......<<<<<<<.<<<<.";
LG19	tRNAscan-SE	tRNA	26385829	26385900	28.28	+	.	ID=tRNA_0005; Type=Pseudo; Anti-codon=TCC; structure=".>>..>>..>>>>........<<<<.>>.>.........<.<<....>>.>.........<.<<<<..<<..";
LG19	tRNAscan-SE	tRNA	26386294	26386365	24.88	+	.	ID=tRNA_0006; Type=Pseudo; Anti-codon=TTC; structure="..>>>>>..>>>>........<<<<.>>>>.........<<<<....>..>>.......<<..<<<<<<...";
LG19	tRNAscan-SE	tRNA	26387093	26387164	24.84	-	.	ID=tRNA_0007; Type=Pseudo; Anti-codon=TCC; structure=".>>..>>..>>>>........<<<<.>>.>.........<.<<....>>.>.........<.<<<<..<<..";
LG20	tRNAscan-SE	tRNA	4057750	4057831	87.92	+	.	ID=tRNA_0070; Type=Ser; Anti-codon=TGA; structure=">>>>>>>..>>>..........<<<.>>>>>.......<<<<<.>>>>...<<<<..>>>>>.......<<<<<<<<<<<<.";
LG20	tRNAscan-SE	tRNA	5641928	5641999	77.71	-	.	ID=tRNA_0069; Type=Cys; Anti-codon=GCA; structure=">>>>>>>..>>>>.......<<<<.>>>>>.......<<<<<.....>>>>>.......<<<<<<<<<<<<.";
LG20	tRNAscan-SE	tRNA	6081766	6081838	32.04	+	.	ID=tRNA_0071; Type=Pseudo; Anti-codon=ATA; structure=">>>>>>>..>.>>........<<.<.>.>>>.........<<<<....>>>>>.......<<<<<<<<<<<<.";
LG20	tRNAscan-SE	tRNA	6240845	6240915	76.98	+	.	ID=tRNA_0072; Type=Gly; Anti-codon=CCC; structure=">>>>>>>..>>>.........<<<.>>>>>.......<<<<<....>>>>>.......<<<<<<<<<<<<.";
LG20	tRNAscan-SE	tRNA	7762547	7762628	68.14	-	.	ID=tRNA_0068; Type=Leu; Anti-codon=TAG; structure=">>>>>>>..>>>...........<<<.>>>>>.......<<<<<.>>>>..<<<<..>>>>>.......<<<<<<<<<<<<.";
LG20	tRNAscan-SE	tRNA	7780091	7780172	69.84	+	.	ID=tRNA_0073; Type=Leu; Anti-codon=AAG; structure=">>>>>>>..>>>...........<<<.>>>>>.......<<<<<.>>>>..<<<<..>>>>>.......<<<<<<<<<<<<.";
LG20	tRNAscan-SE	tRNA	8251943	8252036	68.87	-	.	ID=tRNA_0067; Type=Ile; Anti-codon=TAT; structure=">>>>>>>..>>>>.........<<<<.>>>>>...........................<<<<<.....>>>>>.......<<<<<<<<<<<<.";
LG20	tRNAscan-SE	tRNA	12843067	12843156	70.31	-	.	ID=tRNA_0066; Type=Arg; Anti-codon=TCT; structure=">>>>>>>..>>>>........<<<<.>>>>>........................<<<<<.....>>>>>.......<<<<<<<<<<<<.";
LG20	tRNAscan-SE	tRNA	16633434	16633506	46.64	+	.	ID=tRNA_0074; Type=Arg; Anti-codon=TCT; structure=">.>>>>>..>>>>........<<<<.>>>>>.......<<<<<.....>>>>>.......<<<<<<<<<<.<.";
LG20	tRNAscan-SE	tRNA	16784031	16784102	70.87	+	.	ID=tRNA_0076; Type=Thr; Anti-codon=CGT; structure=">>>>>>>..>>>.........<<<.>>>>>.......<<<<<.....>>>>>.......<<<<<<<<<<<<.";
LG20	tRNAscan-SE	tRNA	16910232	16910325	66.79	+	.	ID=tRNA_0077; Type=Ile; Anti-codon=TAT; structure=">>>>>>>..>>>>.........<<<<.>>>>>...........................<<<<<.....>>>>>.......<<<<<<<<<<<<.";
LG20	tRNAscan-SE	tRNA	16926903	16926996	66.29	-	.	ID=tRNA_0065; Type=Ile; Anti-codon=TAT; structure=">>>>>>>..>>>>.........<<<<.>>>>>...........................<<<<<.....>>>>>.......<<<<<<<<<<<<.";
LG20	tRNAscan-SE	tRNA	16929470	16929563	66.93	-	.	ID=tRNA_0063; Type=Ile; Anti-codon=TAT; structure=">>>>>>>..>>>>.........<<<<.>>>>>...........................<<<<<.....>>>>>.......<<<<<<<<<<<<.";
LG20	tRNAscan-SE	tRNA	16959113	16959206	65.79	+	.	ID=tRNA_0078; Type=Ile; Anti-codon=TAT; structure=">>>>>>>..>>>>.........<<<<.>>>>>...........................<<<<<.....>>>>>.......<<<<<<<<<<<<.";
LG20	tRNAscan-SE	tRNA	16975752	16975845	47	-	.	ID=tRNA_0062; Type=Ile; Anti-codon=TAT; structure=">>>>>>>..>>>>.........<<<<.>>>>>...........................<<<<<.....>>>>>.......<<<<<<<<<<<<.";
LG20	tRNAscan-SE	tRNA	16978362	16978456	58.97	+	.	ID=tRNA_0079; Type=Ile; Anti-codon=TAT; structure=">>>>>>>..>>>>.........<<<<.>>>>>............................<<<<<.....>>>>>.......<<<<<<<<<<<<.";
LG20	tRNAscan-SE	tRNA	16981986	16982044	35.05	-	.	ID=tRNA_0061; Type=Ser; Anti-codon=CGA; structure=">>>>>>>..>>>.........<<<..........>>>>>.......<<<<<<<<<<<<.";
LG20	tRNAscan-SE	tRNA	16988891	16988985	46.16	+	.	ID=tRNA_0080; Type=Ile; Anti-codon=TAT; structure=">>>.>>>..>>>>.........<<<<.>>.>>............................<<.<<.....>.>>>.......<<<.<<<<.<<<.";
LG20	tRNAscan-SE	tRNA	16990146	16990217	68.29	-	.	ID=tRNA_0060; Type=Thr; Anti-codon=TGT; structure=">>>>>>>..>>>.........<<<.>>>>>.......<<<<<.....>>>>>.......<<<<<<<<<<<<.";
LG20	tRNAscan-SE	tRNA	16990682	16990776	56.12	+	.	ID=tRNA_0081; Type=Ile; Anti-codon=TAT; structure=">>>>>>>..>>>>.........<<<<.>>.>>............................<<.<<.....>>>>>.......<<<<<<<<<<<<.";
LG20	tRNAscan-SE	tRNA	16991928	16991999	68.29	-	.	ID=tRNA_0059; Type=Thr; Anti-codon=TGT; structure=">>>>>>>..>>>.........<<<.>>>>>.......<<<<<.....>>>>>.......<<<<<<<<<<<<.";
LG20	tRNAscan-SE	tRNA	16992464	16992558	56.12	+	.	ID=tRNA_0082; Type=Ile; Anti-codon=TAT; structure=">>>>>>>..>>>>.........<<<<.>>.>>............................<<.<<.....>>>>>.......<<<<<<<<<<<<.";
LG20	tRNAscan-SE	tRNA	16993699	16993770	68.29	-	.	ID=tRNA_0058; Type=Thr; Anti-codon=TGT; structure=">>>>>>>..>>>.........<<<.>>>>>.......<<<<<.....>>>>>.......<<<<<<<<<<<<.";
LG20	tRNAscan-SE	tRNA	16994235	16994329	56.12	+	.	ID=tRNA_0083; Type=Ile; Anti-codon=TAT; structure=">>>>>>>..>>>>.........<<<<.>>.>>............................<<.<<.....>>>>>.......<<<<<<<<<<<<.";
LG20	tRNAscan-SE	tRNA	16995480	16995551	68.66	-	.	ID=tRNA_0057; Type=Thr; Anti-codon=CGT; structure=">>>>>>>..>>>.........<<<.>>>>>.......<<<<<.....>>>>>.......<<<<<<<<<<<<.";
LG20	tRNAscan-SE	tRNA	16996016	16996110	56.12	+	.	ID=tRNA_0084; Type=Ile; Anti-codon=TAT; structure=">>>>>>>..>>>>.........<<<<.>>.>>............................<<.<<.....>>>>>.......<<<<<<<<<<<<.";
LG20	tRNAscan-SE	tRNA	16997249	16997319	60.94	-	.	ID=tRNA_0056; Type=Thr; Anti-codon=TGT; structure=">>>>>>>..>>>.........<<<.>>>>>.......<<<<<.....>>>>>......<<<<<<<<<<<<.";
LG20	tRNAscan-SE	tRNA	16997784	16997880	43.03	+	.	ID=tRNA_0085; Type=Ile; Anti-codon=TAT; structure=">>>>>>>..>>>>.........<<<<...>>.>>............................<<.<<.....>>>>>.......<<<<<<<<<<<<.";
LG20	tRNAscan-SE	tRNA	16999028	16999099	68.66	-	.	ID=tRNA_0055; Type=Thr; Anti-codon=CGT; structure=">>>>>>>..>>>.........<<<.>>>>>.......<<<<<.....>>>>>.......<<<<<<<<<<<<.";
LG20	tRNAscan-SE	tRNA	16999563	16999657	56.12	+	.	ID=tRNA_0087; Type=Ile; Anti-codon=TAT; structure=">>>>>>>..>>>>.........<<<<.>>.>>............................<<.<<.....>>>>>.......<<<<<<<<<<<<.";
LG20	tRNAscan-SE	tRNA	17000532	17000603	65.03	-	.	ID=tRNA_0054; Type=Thr; Anti-codon=CGT; structure=">>>>>>>..>>>.........<<<.>>>>>.......<<<<<.....>>>>>.......<<<<<<<<<<<<.";
LG20	tRNAscan-SE	tRNA	17001566	17001638	59.74	-	.	ID=tRNA_0052; Type=Thr; Anti-codon=CGT; structure=">>>>>>>..>>>.........<<<.>>>>>.......<<<<<.....>>>>>........<<<<<<<<<<<<.";
LG20	tRNAscan-SE	tRNA	17598453	17598525	70.63	+	.	ID=tRNA_0088; Type=Arg; Anti-codon=CCT; structure=">>>>>>>..>>>>........<<<<.>>>>>.......<<<<<.....>>>>>.......<<<<<<<<<<<<.";
LG20	tRNAscan-SE	tRNA	18618787	18618859	28.46	-	.	ID=tRNA_0051; Type=Pseudo; Anti-codon=ATG; structure=">.>>>>>..>>>>.........<<<<..>>.........<<........>>>>.......<<<<.<<<<<.<.";
LG20	tRNAscan-SE	tRNA	18917509	18917581	70.63	+	.	ID=tRNA_0089; Type=Arg; Anti-codon=CCT; structure=">>>>>>>..>>>>........<<<<.>>>>>.......<<<<<.....>>>>>.......<<<<<<<<<<<<.";
LG20	tRNAscan-SE	tRNA	18917588	18917660	60.07	+	.	ID=tRNA_0090; Type=Met; Anti-codon=CAT; structure=">>>>>>>..>>>>........<<<<.>>>>>.......<<<<<.....>>>>>.......<<<<<<<<<<<<.";
LG20	tRNAscan-SE	tRNA	18919026	18919098	70.63	+	.	ID=tRNA_0091; Type=Arg; Anti-codon=CCT; structure=">>>>>>>..>>>>........<<<<.>>>>>.......<<<<<.....>>>>>.......<<<<<<<<<<<<.";
LG20	tRNAscan-SE	tRNA	18919105	18919176	68.98	+	.	ID=tRNA_0092; Type=Met; Anti-codon=CAT; structure=">>>>>>>..>>>>.......<<<<.>>>>>.......<<<<<.....>>>>>.......<<<<<<<<<<<<.";
LG20	tRNAscan-SE	tRNA	18919807	18919879	70.63	+	.	ID=tRNA_0093; Type=Arg; Anti-codon=CCT; structure=">>>>>>>..>>>>........<<<<.>>>>>.......<<<<<.....>>>>>.......<<<<<<<<<<<<.";
LG20	tRNAscan-SE	tRNA	18919886	18919957	68.98	+	.	ID=tRNA_0094; Type=Met; Anti-codon=CAT; structure=">>>>>>>..>>>>.......<<<<.>>>>>.......<<<<<.....>>>>>.......<<<<<<<<<<<<.";
LG20	tRNAscan-SE	tRNA	18921352	18921424	70.63	+	.	ID=tRNA_0095; Type=Arg; Anti-codon=CCT; structure=">>>>>>>..>>>>........<<<<.>>>>>.......<<<<<.....>>>>>.......<<<<<<<<<<<<.";
LG20	tRNAscan-SE	tRNA	18922136	18922208	70.63	+	.	ID=tRNA_0096; Type=Arg; Anti-codon=CCT; structure=">>>>>>>..>>>>........<<<<.>>>>>.......<<<<<.....>>>>>.......<<<<<<<<<<<<.";
LG20	tRNAscan-SE	tRNA	18923474	18923546	70.63	+	.	ID=tRNA_0098; Type=Arg; Anti-codon=CCT; structure=">>>>>>>..>>>>........<<<<.>>>>>.......<<<<<.....>>>>>.......<<<<<<<<<<<<.";
LG20	tRNAscan-SE	tRNA	18923553	18923624	68.98	+	.	ID=tRNA_0099; Type=Met; Anti-codon=CAT; structure=">>>>>>>..>>>>.......<<<<.>>>>>.......<<<<<.....>>>>>.......<<<<<<<<<<<<.";
LG20	tRNAscan-SE	tRNA	18924992	18925064	70.63	+	.	ID=tRNA_0100; Type=Arg; Anti-codon=CCT; structure=">>>>>>>..>>>>........<<<<.>>>>>.......<<<<<.....>>>>>.......<<<<<<<<<<<<.";
LG20	tRNAscan-SE	tRNA	18925071	18925142	68.98	+	.	ID=tRNA_0101; Type=Met; Anti-codon=CAT; structure=">>>>>>>..>>>>.......<<<<.>>>>>.......<<<<<.....>>>>>.......<<<<<<<<<<<<.";
LG20	tRNAscan-SE	tRNA	18925772	18925844	70.63	+	.	ID=tRNA_0102; Type=Arg; Anti-codon=CCT; structure=">>>>>>>..>>>>........<<<<.>>>>>.......<<<<<.....>>>>>.......<<<<<<<<<<<<.";
LG20	tRNAscan-SE	tRNA	18925851	18925922	68.98	+	.	ID=tRNA_0103; Type=Met; Anti-codon=CAT; structure=">>>>>>>..>>>>.......<<<<.>>>>>.......<<<<<.....>>>>>.......<<<<<<<<<<<<.";
LG20	tRNAscan-SE	tRNA	18927110	18927182	70.63	+	.	ID=tRNA_0104; Type=Arg; Anti-codon=CCT; structure=">>>>>>>..>>>>........<<<<.>>>>>.......<<<<<.....>>>>>.......<<<<<<<<<<<<.";
LG20	tRNAscan-SE	tRNA	18927189	18927260	68.98	+	.	ID=tRNA_0105; Type=Met; Anti-codon=CAT; structure=">>>>>>>..>>>>.......<<<<.>>>>>.......<<<<<.....>>>>>.......<<<<<<<<<<<<.";
LG20	tRNAscan-SE	tRNA	18928991	18929063	70.63	+	.	ID=tRNA_0106; Type=Arg; Anti-codon=CCT; structure=">>>>>>>..>>>>........<<<<.>>>>>.......<<<<<.....>>>>>.......<<<<<<<<<<<<.";
LG20	tRNAscan-SE	tRNA	18929070	18929141	68.98	+	.	ID=tRNA_0107; Type=Met; Anti-codon=CAT; structure=">>>>>>>..>>>>.......<<<<.>>>>>.......<<<<<.....>>>>>.......<<<<<<<<<<<<.";
LG20	tRNAscan-SE	tRNA	18931142	18931214	70.63	+	.	ID=tRNA_0109; Type=Arg; Anti-codon=CCT; structure=">>>>>>>..>>>>........<<<<.>>>>>.......<<<<<.....>>>>>.......<<<<<<<<<<<<.";
LG20	tRNAscan-SE	tRNA	18931221	18931292	68.98	+	.	ID=tRNA_0110; Type=Met; Anti-codon=CAT; structure=">>>>>>>..>>>>.......<<<<.>>>>>.......<<<<<.....>>>>>.......<<<<<<<<<<<<.";
LG20	tRNAscan-SE	tRNA	19718010	19718081	68.98	-	.	ID=tRNA_0050; Type=Met; Anti-codon=CAT; structure=">>>>>>>..>>>>.......<<<<.>>>>>.......<<<<<.....>>>>>.......<<<<<<<<<<<<.";
LG20	tRNAscan-SE	tRNA	19718088	19718160	70.63	-	.	ID=tRNA_0049; Type=Arg; Anti-codon=CCT; structure=">>>>>>>..>>>>........<<<<.>>>>>.......<<<<<.....>>>>>.......<<<<<<<<<<<<.";
LG20	tRNAscan-SE	tRNA	19718756	19718827	68.98	-	.	ID=tRNA_0048; Type=Met; Anti-codon=CAT; structure=">>>>>>>..>>>>.......<<<<.>>>>>.......<<<<<.....>>>>>.......<<<<<<<<<<<<.";
LG20	tRNAscan-SE	tRNA	19718834	19718906	70.63	-	.	ID=tRNA_0047; Type=Arg; Anti-codon=CCT; structure=">>>>>>>..>>>>........<<<<.>>>>>.......<<<<<.....>>>>>.......<<<<<<<<<<<<.";
LG20	tRNAscan-SE	tRNA	19719505	19719576	68.98	-	.	ID=tRNA_0046; Type=Met; Anti-codon=CAT; structure=">>>>>>>..>>>>.......<<<<.>>>>>.......<<<<<.....>>>>>.......<<<<<<<<<<<<.";
LG20	tRNAscan-SE	tRNA	19719583	19719655	70.63	-	.	ID=tRNA_0045; Type=Arg; Anti-codon=CCT; structure=">>>>>>>..>>>>........<<<<.>>>>>.......<<<<<.....>>>>>.......<<<<<<<<<<<<.";
LG20	tRNAscan-SE	tRNA	20357177	20357249	70.52	+	.	ID=tRNA_0111; Type=Arg; Anti-codon=TCG; structure=">>>>>>>..>>>>........<<<<.>>>>>.......<<<<<.....>>>>>.......<<<<<<<<<<<<.";
LG20	tRNAscan-SE	tRNA	20357534	20357605	68.98	+	.	ID=tRNA_0112; Type=Met; Anti-codon=CAT; structure=">>>>>>>..>>>>.......<<<<.>>>>>.......<<<<<.....>>>>>.......<<<<<<<<<<<<.";
LG20	tRNAscan-SE	tRNA	20361294	20361365	73.65	-	.	ID=tRNA_0044; Type=Gln; Anti-codon=CTG; structure=">>>>>>>..>>>>........<<<<.>>>>>.......<<<<<....>>>>>.......<<<<<<<<<<<<.";
LG20	tRNAscan-SE	tRNA	20729978	20730052	27.39	+	.	ID=tRNA_0113; Type=Pseudo; Anti-codon=CCC; structure=">>..>.>..>>.>........<.<<.>>>...........<<<.....>>>>>.......<<<..<<<.<..<<.";
LG20	tRNAscan-SE	tRNA	21716783	21716855	70.63	+	.	ID=tRNA_0114; Type=Arg; Anti-codon=CCT; structure=">>>>>>>..>>>>........<<<<.>>>>>.......<<<<<.....>>>>>.......<<<<<<<<<<<<.";
LG20	tRNAscan-SE	tRNA	22374187	22374260	75.46	-	.	ID=tRNA_0043; Type=Asn; Anti-codon=GTT; structure=">>>>>>>..>>>>.........<<<<.>>>>>.......<<<<<.....>>>>>.......<<<<<<<<<<<<.";
LG20	tRNAscan-SE	tRNA	22383425	22383498	76.87	-	.	ID=tRNA_0041; Type=Thr; Anti-codon=AGT; structure=">>>>>>>..>>>>.........<<<<.>>>>>.......<<<<<.....>>>>>.......<<<<<<<<<<<<.";
LG20	tRNAscan-SE	tRNA	22384306	22384379	76.87	-	.	ID=tRNA_0040; Type=Thr; Anti-codon=AGT; structure=">>>>>>>..>>>>.........<<<<.>>>>>.......<<<<<.....>>>>>.......<<<<<<<<<<<<.";
LG20	tRNAscan-SE	tRNA	22384859	22384932	35.16	-	.	ID=tRNA_0039; Type=Ile; Anti-codon=AAT; structure=">>>>.>>..>>>>.........<<<<.>>>.>.......<.<<<.....>>.>.........<.<<<<.<<<<.";
LG20	tRNAscan-SE	tRNA	22385664	22385737	76.87	-	.	ID=tRNA_0038; Type=Thr; Anti-codon=AGT; structure=">>>>>>>..>>>>.........<<<<.>>>>>.......<<<<<.....>>>>>.......<<<<<<<<<<<<.";
LG20	tRNAscan-SE	tRNA	22386563	22386636	76.87	-	.	ID=tRNA_0037; Type=Thr; Anti-codon=AGT; structure=">>>>>>>..>>>>.........<<<<.>>>>>.......<<<<<.....>>>>>.......<<<<<<<<<<<<.";
LG20	tRNAscan-SE	tRNA	22387111	22387184	35.16	-	.	ID=tRNA_0036; Type=Ile; Anti-codon=AAT; structure=">>>>.>>..>>>>.........<<<<.>>>.>.......<.<<<.....>>.>.........<.<<<<.<<<<.";
LG20	tRNAscan-SE	tRNA	22387918	22387991	76.87	-	.	ID=tRNA_0035; Type=Thr; Anti-codon=AGT; structure=">>>>>>>..>>>>.........<<<<.>>>>>.......<<<<<.....>>>>>.......<<<<<<<<<<<<.";
LG20	tRNAscan-SE	tRNA	22388470	22388543	35.16	-	.	ID=tRNA_0034; Type=Ile; Anti-codon=AAT; structure=">>>>.>>..>>>>.........<<<<.>>>.>.......<.<<<.....>>.>.........<.<<<<.<<<<.";
LG20	tRNAscan-SE	tRNA	22389277	22389350	76.87	-	.	ID=tRNA_0033; Type=Thr; Anti-codon=AGT; structure=">>>>>>>..>>>>.........<<<<.>>>>>.......<<<<<.....>>>>>.......<<<<<<<<<<<<.";
LG20	tRNAscan-SE	tRNA	22390217	22390290	76.87	-	.	ID=tRNA_0032; Type=Thr; Anti-codon=AGT; structure=">>>>>>>..>>>>.........<<<<.>>>>>.......<<<<<.....>>>>>.......<<<<<<<<<<<<.";
LG20	tRNAscan-SE	tRNA	22390761	22390834	35.16	-	.	ID=tRNA_0030; Type=Ile; Anti-codon=AAT; structure=">>>>.>>..>>>>.........<<<<.>>>.>.......<.<<<.....>>.>.........<.<<<<.<<<<.";
LG20	tRNAscan-SE	tRNA	22391569	22391642	76.87	-	.	ID=tRNA_0029; Type=Thr; Anti-codon=AGT; structure=">>>>>>>..>>>>.........<<<<.>>>>>.......<<<<<.....>>>>>.......<<<<<<<<<<<<.";
LG20	tRNAscan-SE	tRNA	22392117	22392190	35.16	-	.	ID=tRNA_0028; Type=Ile; Anti-codon=AAT; structure=">>>>.>>..>>>>.........<<<<.>>>.>.......<.<<<.....>>.>.........<.<<<<.<<<<.";
LG20	tRNAscan-SE	tRNA	22392949	22393022	35.16	-	.	ID=tRNA_0027; Type=Ile; Anti-codon=AAT; structure=">>>>.>>..>>>>.........<<<<.>>>.>.......<.<<<.....>>.>.........<.<<<<.<<<<.";
LG20	tRNAscan-SE	tRNA	22394832	22394905	35.16	-	.	ID=tRNA_0026; Type=Ile; Anti-codon=AAT; structure=">>>>.>>..>>>>.........<<<<.>>>.>.......<.<<<.....>>.>.........<.<<<<.<<<<.";
LG20	tRNAscan-SE	tRNA	22395638	22395711	76.87	-	.	ID=tRNA_0025; Type=Thr; Anti-codon=AGT; structure=">>>>>>>..>>>>.........<<<<.>>>>>.......<<<<<.....>>>>>.......<<<<<<<<<<<<.";
LG20	tRNAscan-SE	tRNA	22396189	22396262	35.16	-	.	ID=tRNA_0024; Type=Ile; Anti-codon=AAT; structure=">>>>.>>..>>>>.........<<<<.>>>.>.......<.<<<.....>>.>.........<.<<<<.<<<<.";
LG20	tRNAscan-SE	tRNA	22396996	22397069	76.87	-	.	ID=tRNA_0023; Type=Thr; Anti-codon=AGT; structure=">>>>>>>..>>>>.........<<<<.>>>>>.......<<<<<.....>>>>>.......<<<<<<<<<<<<.";
LG20	tRNAscan-SE	tRNA	22397147	22397220	35.16	-	.	ID=tRNA_0022; Type=Ile; Anti-codon=AAT; structure=">>>>.>>..>>>>.........<<<<.>>>.>.......<.<<<.....>>.>.........<.<<<<.<<<<.";
LG20	tRNAscan-SE	tRNA	22398166	22398240	70.34	-	.	ID=tRNA_0021; Type=Asn; Anti-codon=GTT; structure=">>>>>>>..>>>>..........<<<<.>>>>>.......<<<<<.....>>>>>.......<<<<<<<<<<<<.";
LG20	tRNAscan-SE	tRNA	22398889	22398962	65.08	-	.	ID=tRNA_0108; Type=Thr; Anti-codon=AGT; structure=">>.>>>>..>>>>.........<<<<.>>>>>.......<<<<<.....>>>>>.......<<<<<<<<<.<<.";
LG20	tRNAscan-SE	tRNA	22399436	22399509	35.16	-	.	ID=tRNA_0097; Type=Ile; Anti-codon=AAT; structure=">>>>.>>..>>>>.........<<<<.>>>.>.......<.<<<.....>>.>.........<.<<<<.<<<<.";
LG20	tRNAscan-SE	tRNA	22400789	22400862	35.16	-	.	ID=tRNA_0086; Type=Ile; Anti-codon=AAT; structure=">>>>.>>..>>>>.........<<<<.>>>.>.......<.<<<.....>>.>.........<.<<<<.<<<<.";
LG20	tRNAscan-SE	tRNA	22401646	22401719	78.76	-	.	ID=tRNA_0075; Type=Thr; Anti-codon=AGT; structure=">>>>>>>..>>>>.........<<<<.>>>>>.......<<<<<.....>>>>>.......<<<<<<<<<<<<.";
LG20	tRNAscan-SE	tRNA	22402198	22402273	35.1	-	.	ID=tRNA_0064; Type=Thr; Anti-codon=AGT; structure=">>>>>>......>>>>.........<<<<.>>>>>.......<<<<<.....>>>>>.......<<<<<<<<<<<.";
LG20	tRNAscan-SE	tRNA	22481873	22481947	23.34	-	.	ID=tRNA_0053; Type=Pseudo; Anti-codon=CCC; structure=">>..>.>..>>.>........<.<<.>>>...........<<<.....>>>>>.......<<<..<<<.<..<<.";
LG20	tRNAscan-SE	tRNA	22872913	22872984	28.13	-	.	ID=tRNA_0042; Type=Leu; Anti-codon=CAG; structure=">>>>>>>..>>>.........<<<.>>>.>.......<.<<<.....>>>.>.......<.<<<<<<<<<<.";
LG20	tRNAscan-SE	tRNA	22915692	22915774	22.66	+	.	ID=tRNA_0115; Type=Pseudo; Anti-codon=CCC; structure=">>..>.>..>>............<<.>>>...........<<<...>>><<<....>>>>>.......<<<..<<<.<..<<.";
LG20	tRNAscan-SE	tRNA	23031232	23031304	33.62	-	.	ID=tRNA_0031; Type=Pseudo; Anti-codon=ACC; structure=">.>>..>..>>>>.......<<<<...>>>.........<<<......>.>>>.......<<<.<<..<<.<.";
LG20	tRNAscan-SE	tRNA	23760823	23760890	22.25	-	.	ID=tRNA_0020; Type=Pseudo; Anti-codon=GTC; structure=">.>>>....>>>>.......<<<<.....>>.......<<...>>>>>.......<<<<<..<<<.<.";
LG20	tRNAscan-SE	tRNA	25158332	25158396	21.9	-	.	ID=tRNA_0127; Type=Pseudo; Anti-codon=GTC; structure=">.>>..>..>>>>.......<<<<.>>.......<<....>.>>>.......<<<.<<..<<.<.";
LG21	tRNAscan-SE	tRNA	589566	589647	92.28	-	.	ID=tRNA_0191; Type=Ser; Anti-codon=TGA; structure=">>>>>>>..>>>..........<<<.>>>>>.......<<<<<.>>>>...<<<<..>>>>>.......<<<<<<<<<<<<.";
LG21	tRNAscan-SE	tRNA	618916	618986	83.57	+	.	ID=tRNA_0192; Type=Ser; Anti-codon=TGA; structure=">>>>>>>..>>>..........<<<.>>>>>.......<<<<<...>>>>>.......<<<<<<<<<<<<.";
LG21	tRNAscan-SE	tRNA	664689	664763	30.94	+	.	ID=tRNA_0193; Type=Pseudo; Anti-codon=CCC; structure=">>..>.>..>>............<<.>>>...........<<<.....>>>>>.......<<<..<<<.<..<<.";
LG21	tRNAscan-SE	tRNA	885572	885642	57.66	+	.	ID=tRNA_0194; Type=Gly; Anti-codon=TCC; structure=">>>>>>..>>>>........<<<<.>>>>>.......<<<<<....>>>>>.......<<<<<<<.<<<<.";
LG21	tRNAscan-SE	tRNA	889738	889808	57.66	-	.	ID=tRNA_0190; Type=Gly; Anti-codon=TCC; structure=">>>>>>..>>>>........<<<<.>>>>>.......<<<<<....>>>>>.......<<<<<<<.<<<<.";
LG21	tRNAscan-SE	tRNA	1034119	1034201	88.73	-	.	ID=tRNA_0189; Type=Ser; Anti-codon=TGA; structure=">>>>>>>..>>>..........<<<.>>>>>.......<<<<<..>>>.....<<<..>>>>>.......<<<<<<<<<<<<.";
LG21	tRNAscan-SE	tRNA	1505763	1505845	22.66	+	.	ID=tRNA_0004; Type=Pseudo; Anti-codon=CCC; structure=">>..>.>..>>............<<.>>>...........<<<...>>><<<....>>>>>.......<<<..<<<.<..<<.";
LG21	tRNAscan-SE	tRNA	2474693	2474775	22.15	+	.	ID=tRNA_0301; Type=Pseudo; Anti-codon=CCC; structure=">>..>.>..>>............<<.>>>...........<<<...>>><<<....>>>>>.......<<<..<<<.<..<<.";
LG21	tRNAscan-SE	tRNA	2603788	2603859	79.77	+	.	ID=tRNA_0312; Type=Thr; Anti-codon=CGT; structure=">>>>>>>..>>>.........<<<.>>>>>.......<<<<<.....>>>>>.......<<<<<<<<<<<<.";
LG21	tRNAscan-SE	tRNA	4137315	4137397	23.44	-	.	ID=tRNA_0317; Type=Pseudo; Anti-codon=CCC; structure=">>..>.>..>>............<<.>>>...........<<<...>>><<<....>>>>>.......<<<..<<<.<..<<.";
LG21	tRNAscan-SE	tRNA	5025426	5025497	71.85	-	.	ID=tRNA_0316; Type=Cys; Anti-codon=GCA; structure=">>>>>>>..>>>>.......<<<<.>>>>>.......<<<<<.....>>>>>.......<<<<<<<<<<<<.";
LG21	tRNAscan-SE	tRNA	5030182	5030253	77.71	+	.	ID=tRNA_0318; Type=Cys; Anti-codon=GCA; structure=">>>>>>>..>>>>.......<<<<.>>>>>.......<<<<<.....>>>>>.......<<<<<<<<<<<<.";
LG21	tRNAscan-SE	tRNA	5033892	5033963	71.78	-	.	ID=tRNA_0315; Type=Cys; Anti-codon=GCA; structure=">>>>>>>..>>>>.......<<<<.>>>>>.......<<<<<.....>>>>>.......<<<<<<<<<<<<.";
LG21	tRNAscan-SE	tRNA	5034564	5034635	72.19	-	.	ID=tRNA_0314; Type=Cys; Anti-codon=GCA; structure=">>>>>>>..>>>>.......<<<<.>>>>>.......<<<<<.....>>>>>.......<<<<<<<<<<<<.";
LG21	tRNAscan-SE	tRNA	5053453	5053524	61.11	-	.	ID=tRNA_0313; Type=Cys; Anti-codon=GCA; structure=">>>>>>>..>>>>.......<<<<.>>>>>.......<<<<<.....>.>>>.......<<<.<<<<<<<<.";
LG21	tRNAscan-SE	tRNA	6368361	6368432	71.06	-	.	ID=tRNA_0311; Type=Cys; Anti-codon=GCA; structure=">>>>>>>..>>>>.......<<<<.>>>>>.......<<<<<.....>>>.>.......<.<<<<<<<<<<.";
LG21	tRNAscan-SE	tRNA	6380428	6380499	73.59	+	.	ID=tRNA_0319; Type=Cys; Anti-codon=GCA; structure=">>>>>>>..>>>>.......<<<<.>>>>>.......<<<<<.....>>>>>.......<<<<<<<<<<<<.";
LG21	tRNAscan-SE	tRNA	6413601	6413672	54.46	+	.	ID=tRNA_0320; Type=Cys; Anti-codon=ACA; structure=">>>>>>>..>>>.........<<<.>>>>>.......<<<<<.....>>>>.........<<<<<<<<<<<.";
LG21	tRNAscan-SE	tRNA	6441364	6441435	40.42	-	.	ID=tRNA_0310; Type=Cys; Anti-codon=GCA; structure=">>>..>>..>>>>.......<<<<.>>>>>.......<<<<<.....>.>>>.......<<<.<<<..<<<.";
LG21	tRNAscan-SE	tRNA	6443191	6443262	52.15	-	.	ID=tRNA_0309; Type=Cys; Anti-codon=GCA; structure=">>>>>.>...>>>.......<<<..>..>>.......<<..<.....>>>>>.......<<<<<<.<<<<<.";
LG21	tRNAscan-SE	tRNA	6485754	6485825	42.23	-	.	ID=tRNA_0308; Type=Pseudo; Anti-codon=GCA; structure=">.>>>>>..>>>.........<<<.>>>.>.......<.<<<......>.>>.......<<.<.<<<<<.<.";
LG21	tRNAscan-SE	tRNA	6486590	6486661	71.91	+	.	ID=tRNA_0321; Type=Cys; Anti-codon=GCA; structure=">>>>>>>..>>>>.......<<<<..>>>>.......<<<<......>>>>>.......<<<<<<<<<<<<.";
LG21	tRNAscan-SE	tRNA	6487767	6487838	70.3	+	.	ID=tRNA_0322; Type=Cys; Anti-codon=GCA; structure=">>>>>>>..>>>>.......<<<<.>>>>>.......<<<<<.....>>>>>.......<<<<<<<<<<<<.";
LG21	tRNAscan-SE	tRNA	6492515	6492586	68.04	+	.	ID=tRNA_0323; Type=SeC; Anti-codon=TCA; structure=">>>>>>>..>>>>.......<<<<.>>>>>.......<<<<<.....>>>>>.......<<<<<<<<<<<<.";
LG21	tRNAscan-SE	tRNA	8000769	8000840	65.42	-	.	ID=tRNA_0307; Type=Cys; Anti-codon=GCA; structure=">>>>>>>..>>>>.......<<<<.>.>>>.......<<<.<.....>>>>>.......<<<<<<<<<<<<.";
LG21	tRNAscan-SE	tRNA	8547509	8547580	79.77	+	.	ID=tRNA_0324; Type=Thr; Anti-codon=CGT; structure=">>>>>>>..>>>.........<<<.>>>>>.......<<<<<.....>>>>>.......<<<<<<<<<<<<.";
LG21	tRNAscan-SE	tRNA	8805038	8805106	29.87	-	.	ID=tRNA_0306; Type=Gly; Anti-codon=ACC; structure=">.>>>>>..>>>>.......<<<<..>>>>.........<<<<.........>.......<<<<<<.<.";
LG21	tRNAscan-SE	tRNA	9403220	9403292	21.87	+	.	ID=tRNA_0302; Type=Pseudo; Anti-codon=ACT; structure=">.>>..>..>>>>.......<<<<...>>>.........<<<........>>>.......<<<..<..<<.<.";
LG21	tRNAscan-SE	tRNA	12408283	12408356	82.8	-	.	ID=tRNA_0305; Type=Thr; Anti-codon=AGT; structure=">>>>>>>..>>>>.........<<<<.>>>>>.......<<<<<.....>>>>>.......<<<<<<<<<<<<.";
LG21	tRNAscan-SE	tRNA	13149170	13149251	68.14	+	.	ID=tRNA_0303; Type=Leu; Anti-codon=TAG; structure=">>>>>>>..>>>...........<<<.>>>>>.......<<<<<.>>>>..<<<<..>>>>>.......<<<<<<<<<<<<.";
LG21	tRNAscan-SE	tRNA	14785866	14785938	23.02	-	.	ID=tRNA_0304; Type=Pseudo; Anti-codon=AAC; structure=">.>...>..>>>>.......<<<<...>>>.........<<<......>.>>.........<<.<<...<.<.";
LG21	tRNAscan-SE	tRNA	15969622	15969704	22.15	+	.	ID=tRNA_0030; Type=Pseudo; Anti-codon=CCC; structure=">>..>.>..>>............<<.>>>...........<<<...>>><<<....>>>>>.......<<<..<<<.<..<<.";
LG21	tRNAscan-SE	tRNA	16311574	16311645	73.65	-	.	ID=tRNA_0128; Type=Gln; Anti-codon=CTG; structure=">>>>>>>..>>>>........<<<<.>>>>>.......<<<<<....>>>>>.......<<<<<<<<<<<<.";
LG21	tRNAscan-SE	tRNA	16471221	16471293	70.63	-	.	ID=tRNA_0127; Type=Arg; Anti-codon=CCT; structure=">>>>>>>..>>>>........<<<<.>>>>>.......<<<<<.....>>>>>.......<<<<<<<<<<<<.";
LG21	tRNAscan-SE	tRNA	17427562	17427643	88.95	+	.	ID=tRNA_0125; Type=Ser; Anti-codon=AGA; structure=">>>>>>>..>>>..........<<<.>>>>>.......<<<<<.>>>>...<<<<..>>>>>.......<<<<<<<<<<<<.";
LG21	tRNAscan-SE	tRNA	19850894	19850966	22.74	+	.	ID=tRNA_0129; Type=Pseudo; Anti-codon=ACT; structure=">.>>..>..>>>>.......<<<<...>>>.........<<<......>.>>>.......<<<.<<..<<.<.";
LG21	tRNAscan-SE	tRNA	20229154	20229225	27.91	+	.	ID=tRNA_0130; Type=Pseudo; Anti-codon=ACT; structure=">>>>>..>>>>.......<<<<...>>>.........<<<......>>>.>.......<.<<<<<...<<<.";
LG21	tRNAscan-SE	tRNA	20254550	20254624	27.39	+	.	ID=tRNA_0131; Type=Pseudo; Anti-codon=CCC; structure=">>..>.>..>>.>........<.<<.>>>...........<<<.....>>>>>.......<<<..<<<.<..<<.";
LG21	tRNAscan-SE	tRNA	20731180	20731260	21.86	+	.	ID=tRNA_0132; Type=Pseudo; Anti-codon=TGA; structure="..>>>.>..>>>..........<<<..>>>>.......<<<<...>>>..<.<<..>>>>>.......<<<<<<.<<<...";
LG21	tRNAscan-SE	tRNA	20956372	20956444	23.95	-	.	ID=tRNA_0126; Type=Pseudo; Anti-codon=ACC; structure=">.>>..>..>>>>.......<<<<...>>>.........<<<......>.>>>.......<<<.<<..<<.<.";
LG21	tRNAscan-SE	tRNA	21142496	21142568	21.37	+	.	ID=tRNA_0133; Type=Pseudo; Anti-codon=CAC; structure=".>>.>....>..>........<..<..>>>..........<<<.....>>>>>.......<<<<<..<.<<..";
LG21	tRNAscan-SE	tRNA	21290200	21290272	48.65	+	.	ID=tRNA_0134; Type=Val; Anti-codon=TAC; structure=">>>>>>...>>>..........<<<.>>>>>.......<<<<<.....>>>.>.......<.<<<.<<<<<<.";
LG21	tRNAscan-SE	tRNA	21434148	21434220	40.76	+	.	ID=tRNA_0135; Type=Pseudo; Anti-codon=CAC; structure=">.>>..>..>>>..........<<<..>>>>.......<<<<......>>>>>.......<<<<<<..<<.<.";
LG21	tRNAscan-SE	tRNA	21438264	21438336	35.06	+	.	ID=tRNA_0136; Type=Val; Anti-codon=TAC; structure=">.>>>>>..>>>..........<<<.>>>>>.......<<<<<.....>>>.>.......<.<<<<<<<<.<.";
LG21	tRNAscan-SE	tRNA	24681381	24681462	22.34	-	.	ID=tRNA_0003; Type=Pseudo; Anti-codon=TGA; structure="..>>>>>...>>..........<<..>>.>>.......<<.<<..>>>.><.<<<..>>>>>.......<<<<<<<<<<...";
LG21	tRNAscan-SE	tRNA	24849340	24849414	25.54	-	.	ID=tRNA_0002; Type=Pseudo; Anti-codon=ACA; structure=">>>.>>.....>>>.........<<<...>>>.........<<<.......>>>>.......<<<<..<<.<<<.";
LG21	tRNAscan-SE	tRNA	25296307	25296388	29.32	-	.	ID=tRNA_0001; Type=Pseudo; Anti-codon=CCC; structure=">>>.>>>..>>.>........<.<<.>>>...........<<<...>>><<<.....>>>>.......<<<<..<<<.<<<.";
LG21	tRNAscan-SE	tRNA	25356366	25356438	28.58	+	.	ID=tRNA_0004; Type=Pseudo; Anti-codon=ACC; structure=">.>>.>...>>>>.......<<<<...>>>.........<<<......>>.>>.......<<.<<.<.<<.<.";
LG22	tRNAscan-SE	tRNA	773040	773122	22.66	+	.	ID=tRNA_0119; Type=Pseudo; Anti-codon=CCC; structure=">>..>.>..>>............<<.>>>...........<<<...>>><<<....>>>>>.......<<<..<<<.<..<<.";
LG22	tRNAscan-SE	tRNA	961404	961478	25.3	-	.	ID=tRNA_0118; Type=Pseudo; Anti-codon=ACC; structure=">>>..>.....>>>>.......<<<<...>>>.........<<<......>.>>>.......<<<.<.<..<<<.";
LG22	tRNAscan-SE	tRNA	1987914	1987988	22.78	+	.	ID=tRNA_0120; Type=Pseudo; Anti-codon=ACC; structure=">>>.>>.....>>>>.......<<<<...>>>.........<<<......>.>>>.......<<<.<.<<.<<<.";
LG22	tRNAscan-SE	tRNA	2410486	2410559	21.97	-	.	ID=tRNA_0117; Type=Pseudo; Anti-codon=ACC; structure=".>>>.>>..>>>>.......<<<<...>>...........<<.......>.>>>.......<<<<.<<.<<<..";
LG22	tRNAscan-SE	tRNA	3151458	3151527	22.53	-	.	ID=tRNA_0116; Type=Pseudo; Anti-codon=ACT; structure=">.>>>>>..>>>>.......<<<<...>>>.........<<<......>..>>.......<<<<<<<<<.";
LG22	tRNAscan-SE	tRNA	4043150	4043223	24.13	-	.	ID=tRNA_0115; Type=Pseudo; Anti-codon=GCC; structure=".>>>.>>..>>>>.......<<<<...>>>.........<<<.......>>.>>.......<<.<<<<.<<<..";
LG22	tRNAscan-SE	tRNA	4761205	4761286	88.33	+	.	ID=tRNA_0121; Type=Ser; Anti-codon=TGA; structure=">>>>>>>..>>>..........<<<.>>>>>.......<<<<<.>>>>...<<<<..>>>>>.......<<<<<<<<<<<<.";
LG22	tRNAscan-SE	tRNA	4761673	4761746	84.06	-	.	ID=tRNA_0114; Type=Thr; Anti-codon=AGT; structure=">>>>>>>..>>>>.........<<<<.>>>>>.......<<<<<.....>>>>>.......<<<<<<<<<<<<.";
LG22	tRNAscan-SE	tRNA	6069367	6069440	72.95	-	.	ID=tRNA_0113; Type=Arg; Anti-codon=TCT; structure=">>>>>>>..>>>>.........<<<<.>>>>>.......<<<<<.....>>>>>.......<<<<<<<<<<<<.";
LG22	tRNAscan-SE	tRNA	8044417	8044487	32.22	+	.	ID=tRNA_0116; Type=Pseudo; Anti-codon=TGC; structure=">>>>>.>..>>>>.......<<<<...>>>.......<<<.......>>>.>.......<.<<<<<<<<<.";
LG22	tRNAscan-SE	tRNA	8045079	8045150	72.39	+	.	ID=tRNA_0117; Type=Ala; Anti-codon=TGC; structure=">>>>>>>..>>>>.......<<<<.>>>>>.......<<<<<.....>>>>>.......<<<<<<<<<<<<.";
LG22	tRNAscan-SE	tRNA	8051609	8051680	45.42	+	.	ID=tRNA_0118; Type=Ala; Anti-codon=TGC; structure=">>>>>>>...>>>.......<<<..>>.>.........<.<<.....>>>>>.......<<<<<<<<<<<<.";
LG22	tRNAscan-SE	tRNA	8054345	8054416	75.68	+	.	ID=tRNA_0119; Type=Ala; Anti-codon=CGC; structure=">>>>>>>..>>>>.......<<<<.>>>>>.......<<<<<.....>>>>>.......<<<<<<<<<<<<.";
LG22	tRNAscan-SE	tRNA	8098298	8098369	28.68	-	.	ID=tRNA_0123; Type=Pseudo; Anti-codon=CGC; structure=".>.>.>>...>>>.......<<<..>>>>>.......<<<<<.....>.>>>.......<<<.<<<.<.<..";
LG22	tRNAscan-SE	tRNA	8098499	8098570	68.99	-	.	ID=tRNA_0122; Type=Ala; Anti-codon=TGC; structure=">>>>>>>..>>>>.......<<<<.>>>>>.......<<<<<.....>>>>>.......<<<<<<<<<<<<.";
LG22	tRNAscan-SE	tRNA	8098940	8099011	75.68	-	.	ID=tRNA_0121; Type=Ala; Anti-codon=CGC; structure=">>>>>>>..>>>>.......<<<<.>>>>>.......<<<<<.....>>>>>.......<<<<<<<<<<<<.";
LG22	tRNAscan-SE	tRNA	8115019	8115090	68.28	-	.	ID=tRNA_0120; Type=Ala; Anti-codon=TGC; structure=">>>>>>>..>>>>.......<<<<.>>>>>.......<<<<<.....>>>>>.......<<<<<<<<<<<<.";
LG22	tRNAscan-SE	tRNA	8326444	8326525	69.84	+	.	ID=tRNA_0082; Type=Leu; Anti-codon=AAG; structure=">>>>>>>..>>>...........<<<.>>>>>.......<<<<<.>>>>..<<<<..>>>>>.......<<<<<<<<<<<<.";
LG22	tRNAscan-SE	tRNA	8542700	8542773	25.92	-	.	ID=tRNA_0087; Type=Gly; Anti-codon=ACC; structure=">>>>.>>...>>>>.......<<<<...>>>.........<<<......>>>>>.......<<<<<<<.<<<<.";
LG22	tRNAscan-SE	tRNA	8698278	8698359	85.34	+	.	ID=tRNA_0088; Type=Ser; Anti-codon=GCT; structure=">>>>>>>..>>>..........<<<.>>>>>.......<<<<<.>>>>...<<<<..>>>>>.......<<<<<<<<<<<<.";
LG22	tRNAscan-SE	tRNA	8708620	8708693	80.66	+	.	ID=tRNA_0089; Type=Ile; Anti-codon=AAT; structure=">>>>.>>..>>>>.........<<<<.>>>>>.......<<<<<.....>>>>>.......<<<<<<<.<<<<.";
LG22	tRNAscan-SE	tRNA	8708887	8708962	33.98	+	.	ID=tRNA_0090; Type=Pseudo; Anti-codon=AAT; structure=">.>...>.....>>>.........<<<..>>>>>.......<<<<<.....>>>>>.......<<<<<<...<.<.";
LG22	tRNAscan-SE	tRNA	8711328	8711401	80.66	+	.	ID=tRNA_0091; Type=Ile; Anti-codon=AAT; structure=">>>>.>>..>>>>.........<<<<.>>>>>.......<<<<<.....>>>>>.......<<<<<<<.<<<<.";
LG22	tRNAscan-SE	tRNA	8724700	8724781	50.91	-	.	ID=tRNA_0086; Type=Leu; Anti-codon=AAG; structure=">>>>..>..>>>...........<<<.>>>>>.......<<<<<.>>>....<<<..>>>>>.......<<<<<<..<<<<.";
LG22	tRNAscan-SE	tRNA	8725246	8725327	70.08	-	.	ID=tRNA_0085; Type=Leu; Anti-codon=TAG; structure=">>>>>>>..>>>...........<<<.>>>>>.......<<<<<.>>>>..<<<<..>>>>>.......<<<<<<<<<<<<.";
LG22	tRNAscan-SE	tRNA	8726139	8726220	69.84	-	.	ID=tRNA_0084; Type=Leu; Anti-codon=AAG; structure=">>>>>>>..>>>...........<<<.>>>>>.......<<<<<.>>>>..<<<<..>>>>>.......<<<<<<<<<<<<.";
LG22	tRNAscan-SE	tRNA	8731090	8731161	68.98	-	.	ID=tRNA_0083; Type=Met; Anti-codon=CAT; structure=">>>>>>>..>>>>.......<<<<.>>>>>.......<<<<<.....>>>>>.......<<<<<<<<<<<<.";
LG22	tRNAscan-SE	tRNA	9148408	9148478	81.62	-	.	ID=tRNA_0095; Type=Gly; Anti-codon=GCC; structure=">>>>>>>..>>>>.......<<<<.>>>>>.......<<<<<....>>>>>.......<<<<<<<<<<<<.";
LG22	tRNAscan-SE	tRNA	9150023	9150094	68.98	+	.	ID=tRNA_0092; Type=Met; Anti-codon=CAT; structure=">>>>>>>..>>>>.......<<<<.>>>>>.......<<<<<.....>>>>>.......<<<<<<<<<<<<.";
LG22	tRNAscan-SE	tRNA	9581968	9582041	80.66	-	.	ID=tRNA_0094; Type=Ile; Anti-codon=AAT; structure=">>>>.>>..>>>>.........<<<<.>>>>>.......<<<<<.....>>>>>.......<<<<<<<.<<<<.";
LG22	tRNAscan-SE	tRNA	9635126	9635200	30.94	+	.	ID=tRNA_0093; Type=Pseudo; Anti-codon=CCC; structure=">>..>.>..>>............<<.>>>...........<<<.....>>>>>.......<<<..<<<.<..<<.";
LG22	tRNAscan-SE	tRNA	12322061	12322135	39.56	-	.	ID=tRNA_0035; Type=Pseudo; Anti-codon=CCC; structure=">>..>.>..>>>..........<<<.>>>...........<<<.....>>>>>.......<<<..<<<.<..<<.";
LG22	tRNAscan-SE	tRNA	12468375	12468462	69.74	-	.	ID=tRNA_0034; Type=Arg; Anti-codon=TCT; structure=">>>>>>>..>>>>........<<<<.>>>>>......................<<<<<.....>>>>>.......<<<<<<<<<<<<.";
LG22	tRNAscan-SE	tRNA	12487039	12487110	77.17	+	.	ID=tRNA_0036; Type=Ala; Anti-codon=CGC; structure=">>>>>>>..>>>>.......<<<<.>>>>>.......<<<<<.....>>>>>.......<<<<<<<<<<<<.";
LG22	tRNAscan-SE	tRNA	14837020	14837093	82.24	-	.	ID=tRNA_0032; Type=Asn; Anti-codon=GTT; structure=">>>>>>>..>>>>.........<<<<.>>>>>.......<<<<<.....>>>>>.......<<<<<<<<<<<<.";
LG22	tRNAscan-SE	tRNA	14838365	14838438	82.24	+	.	ID=tRNA_0037; Type=Asn; Anti-codon=GTT; structure=">>>>>>>..>>>>.........<<<<.>>>>>.......<<<<<.....>>>>>.......<<<<<<<<<<<<.";
LG22	tRNAscan-SE	tRNA	14839841	14839914	82.24	+	.	ID=tRNA_0038; Type=Asn; Anti-codon=GTT; structure=">>>>>>>..>>>>.........<<<<.>>>>>.......<<<<<.....>>>>>.......<<<<<<<<<<<<.";
LG22	tRNAscan-SE	tRNA	14840603	14840676	82.24	+	.	ID=tRNA_0039; Type=Asn; Anti-codon=GTT; structure=">>>>>>>..>>>>.........<<<<.>>>>>.......<<<<<.....>>>>>.......<<<<<<<<<<<<.";
LG22	tRNAscan-SE	tRNA	14841863	14841934	59.05	+	.	ID=tRNA_0040; Type=Asn; Anti-codon=GTT; structure=">>>>>>>..>>>>........<<<<.>>.>>.......<<.<<....>>>>>.......<<<<<<<<<<<<.";
LG22	tRNAscan-SE	tRNA	14844244	14844317	73.63	+	.	ID=tRNA_0041; Type=Asn; Anti-codon=GTT; structure=">>>>>>>..>>>>.........<<<<.>>>>>.......<<<<<.....>>>>>.......<<<<<<<<<<<<.";
LG22	tRNAscan-SE	tRNA	14845524	14845596	69.89	+	.	ID=tRNA_0042; Type=Asn; Anti-codon=GTT; structure=">>>>>>>..>>>>.........<<<<.>>.>>.......<<.<<....>>>>>.......<<<<<<<<<<<<.";
LG22	tRNAscan-SE	tRNA	14847112	14847203	20.57	+	.	ID=tRNA_0043; Type=Pseudo; Anti-codon=CGA; structure=">.>>>>>..>>>..........<<<..>>>>.>......................<<<<<......>>>>.........<<<<.<<<<<.<.";
LG22	tRNAscan-SE	tRNA	14848059	14848135	63.14	+	.	ID=tRNA_0045; Type=Asn; Anti-codon=GTT; structure=">>>>>>>..>>>>...........<<<<.>>>>>.......<<<<<......>>>>>.......<<<<<<<<<<<<.";
LG22	tRNAscan-SE	tRNA	14849331	14849416	50.44	+	.	ID=tRNA_0046; Type=Asn; Anti-codon=GTT; structure=">>>>>>>..>>>>..................<<<...<.>>>>>.......<<<<<.....>>>>>.......<<<<<<<<<<<<.";
LG22	tRNAscan-SE	tRNA	14850611	14850684	82.24	+	.	ID=tRNA_0047; Type=Asn; Anti-codon=GTT; structure=">>>>>>>..>>>>.........<<<<.>>>>>.......<<<<<.....>>>>>.......<<<<<<<<<<<<.";
LG22	tRNAscan-SE	tRNA	14851496	14851569	82.24	+	.	ID=tRNA_0048; Type=Asn; Anti-codon=GTT; structure=">>>>>>>..>>>>.........<<<<.>>>>>.......<<<<<.....>>>>>.......<<<<<<<<<<<<.";
LG22	tRNAscan-SE	tRNA	14852871	14853098	36.63	+	.	ID=tRNA_0049; Type=Asn; Anti-codon=GTT; structure=">>>>>>>..>>>....................<<<.>>.>>........................................................................................................................................................<<.<<.....>>>>>.......<<<<<<<<<<<<.";
LG22	tRNAscan-SE	tRNA	14853791	14853864	82.24	+	.	ID=tRNA_0050; Type=Asn; Anti-codon=GTT; structure=">>>>>>>..>>>>.........<<<<.>>>>>.......<<<<<.....>>>>>.......<<<<<<<<<<<<.";
LG22	tRNAscan-SE	tRNA	14855403	14855484	52.21	+	.	ID=tRNA_0051; Type=Asn; Anti-codon=GTT; structure=">>>>>>>..>>>>.........<<<<.........>.>.>.......<.<.<.....>>>>>.......<<<<<<<<<<<<.";
LG22	tRNAscan-SE	tRNA	14856298	14856371	82.24	+	.	ID=tRNA_0052; Type=Asn; Anti-codon=GTT; structure=">>>>>>>..>>>>.........<<<<.>>>>>.......<<<<<.....>>>>>.......<<<<<<<<<<<<.";
LG22	tRNAscan-SE	tRNA	14857565	14857638	82.24	+	.	ID=tRNA_0053; Type=Asn; Anti-codon=GTT; structure=">>>>>>>..>>>>.........<<<<.>>>>>.......<<<<<.....>>>>>.......<<<<<<<<<<<<.";
LG22	tRNAscan-SE	tRNA	14858451	14858524	82.24	+	.	ID=tRNA_0054; Type=Asn; Anti-codon=GTT; structure=">>>>>>>..>>>>.........<<<<.>>>>>.......<<<<<.....>>>>>.......<<<<<<<<<<<<.";
LG22	tRNAscan-SE	tRNA	14859714	14859787	75.95	+	.	ID=tRNA_0056; Type=Asn; Anti-codon=GTT; structure=">>>>>>>..>>>>.........<<<<..>>>>.......<<<<......>>>>>.......<<<<<<<<<<<<.";
LG22	tRNAscan-SE	tRNA	14860598	14860671	82.24	+	.	ID=tRNA_0057; Type=Asn; Anti-codon=GTT; structure=">>>>>>>..>>>>.........<<<<.>>>>>.......<<<<<.....>>>>>.......<<<<<<<<<<<<.";
LG22	tRNAscan-SE	tRNA	14862076	14862149	82.24	+	.	ID=tRNA_0058; Type=Asn; Anti-codon=GTT; structure=">>>>>>>..>>>>.........<<<<.>>>>>.......<<<<<.....>>>>>.......<<<<<<<<<<<<.";
LG22	tRNAscan-SE	tRNA	14862960	14863033	82.24	+	.	ID=tRNA_0059; Type=Asn; Anti-codon=GTT; structure=">>>>>>>..>>>>.........<<<<.>>>>>.......<<<<<.....>>>>>.......<<<<<<<<<<<<.";
LG22	tRNAscan-SE	tRNA	14864599	14864672	82.24	+	.	ID=tRNA_0060; Type=Asn; Anti-codon=GTT; structure=">>>>>>>..>>>>.........<<<<.>>>>>.......<<<<<.....>>>>>.......<<<<<<<<<<<<.";
LG22	tRNAscan-SE	tRNA	14865485	14865557	69.49	+	.	ID=tRNA_0061; Type=Asn; Anti-codon=GTT; structure=">>>>>>>..>>>>.........<<<<.>>>>.......<<<<......>>>>>.......<<<<<<<<<<<<.";
LG22	tRNAscan-SE	tRNA	14866498	14866571	82.24	+	.	ID=tRNA_0062; Type=Asn; Anti-codon=GTT; structure=">>>>>>>..>>>>.........<<<<.>>>>>.......<<<<<.....>>>>>.......<<<<<<<<<<<<.";
LG22	tRNAscan-SE	tRNA	14867755	14867828	82.24	+	.	ID=tRNA_0063; Type=Asn; Anti-codon=GTT; structure=">>>>>>>..>>>>.........<<<<.>>>>>.......<<<<<.....>>>>>.......<<<<<<<<<<<<.";
LG22	tRNAscan-SE	tRNA	14868864	14868937	82.24	+	.	ID=tRNA_0064; Type=Asn; Anti-codon=GTT; structure=">>>>>>>..>>>>.........<<<<.>>>>>.......<<<<<.....>>>>>.......<<<<<<<<<<<<.";
LG22	tRNAscan-SE	tRNA	14871069	14871142	82.24	+	.	ID=tRNA_0065; Type=Asn; Anti-codon=GTT; structure=">>>>>>>..>>>>.........<<<<.>>>>>.......<<<<<.....>>>>>.......<<<<<<<<<<<<.";
LG22	tRNAscan-SE	tRNA	15566497	15566570	82.24	-	.	ID=tRNA_0031; Type=Asn; Anti-codon=GTT; structure=">>>>>>>..>>>>.........<<<<.>>>>>.......<<<<<.....>>>>>.......<<<<<<<<<<<<.";
LG22	tRNAscan-SE	tRNA	15567025	15567098	82.24	+	.	ID=tRNA_0067; Type=Asn; Anti-codon=GTT; structure=">>>>>>>..>>>>.........<<<<.>>>>>.......<<<<<.....>>>>>.......<<<<<<<<<<<<.";
LG22	tRNAscan-SE	tRNA	15567418	15567491	82.24	-	.	ID=tRNA_0030; Type=Asn; Anti-codon=GTT; structure=">>>>>>>..>>>>.........<<<<.>>>>>.......<<<<<.....>>>>>.......<<<<<<<<<<<<.";
LG22	tRNAscan-SE	tRNA	15567831	15567903	80.47	-	.	ID=tRNA_0029; Type=Lys; Anti-codon=CTT; structure=">>>>>>>..>>>>........<<<<.>>>>>.......<<<<<.....>>>>>.......<<<<<<<<<<<<.";
LG22	tRNAscan-SE	tRNA	15568152	15568225	82.24	+	.	ID=tRNA_0068; Type=Asn; Anti-codon=GTT; structure=">>>>>>>..>>>>.........<<<<.>>>>>.......<<<<<.....>>>>>.......<<<<<<<<<<<<.";
LG22	tRNAscan-SE	tRNA	15568458	15568530	80.47	-	.	ID=tRNA_0028; Type=Lys; Anti-codon=CTT; structure=">>>>>>>..>>>>........<<<<.>>>>>.......<<<<<.....>>>>>.......<<<<<<<<<<<<.";
LG22	tRNAscan-SE	tRNA	15600417	15600487	81.62	-	.	ID=tRNA_0027; Type=Gly; Anti-codon=GCC; structure=">>>>>>>..>>>>.......<<<<.>>>>>.......<<<<<....>>>>>.......<<<<<<<<<<<<.";
LG22	tRNAscan-SE	tRNA	15603223	15603293	81.62	-	.	ID=tRNA_0026; Type=Gly; Anti-codon=GCC; structure=">>>>>>>..>>>>.......<<<<.>>>>>.......<<<<<....>>>>>.......<<<<<<<<<<<<.";
LG22	tRNAscan-SE	tRNA	15663489	15663571	77.82	+	.	ID=tRNA_0069; Type=Leu; Anti-codon=CAG; structure=">>>>>>>..>>>...........<<<.>>>>>.......<<<<<.>>>>...<<<<..>>>>>.......<<<<<<<<<<<<.";
LG22	tRNAscan-SE	tRNA	15663676	15663758	77.82	+	.	ID=tRNA_0070; Type=Leu; Anti-codon=CAG; structure=">>>>>>>..>>>...........<<<.>>>>>.......<<<<<.>>>>...<<<<..>>>>>.......<<<<<<<<<<<<.";
LG22	tRNAscan-SE	tRNA	15663863	15663945	77.82	+	.	ID=tRNA_0071; Type=Leu; Anti-codon=CAG; structure=">>>>>>>..>>>...........<<<.>>>>>.......<<<<<.>>>>...<<<<..>>>>>.......<<<<<<<<<<<<.";
LG22	tRNAscan-SE	tRNA	15664035	15664117	77.82	+	.	ID=tRNA_0072; Type=Leu; Anti-codon=CAG; structure=">>>>>>>..>>>...........<<<.>>>>>.......<<<<<.>>>>...<<<<..>>>>>.......<<<<<<<<<<<<.";
LG22	tRNAscan-SE	tRNA	15690801	15690873	80.47	+	.	ID=tRNA_0073; Type=Lys; Anti-codon=CTT; structure=">>>>>>>..>>>>........<<<<.>>>>>.......<<<<<.....>>>>>.......<<<<<<<<<<<<.";
LG22	tRNAscan-SE	tRNA	15802984	15803057	82.24	+	.	ID=tRNA_0074; Type=Asn; Anti-codon=GTT; structure=">>>>>>>..>>>>.........<<<<.>>>>>.......<<<<<.....>>>>>.......<<<<<<<<<<<<.";
LG22	tRNAscan-SE	tRNA	15810012	15810083	65.4	-	.	ID=tRNA_0025; Type=Asp; Anti-codon=GTC; structure=">>>>>>>..>>>>........<<<<.>>>>>.......<<<<<.....>>>>.......<<<<.<<<<<<<.";
LG22	tRNAscan-SE	tRNA	15813796	15813867	71.1	-	.	ID=tRNA_0024; Type=Asp; Anti-codon=GTC; structure=">>>>>>>..>>>>........<<<<.>>>>>.......<<<<<....>>>>>.......<<<<<<<<<<<<.";
LG22	tRNAscan-SE	tRNA	15894297	15894378	85.34	-	.	ID=tRNA_0023; Type=Ser; Anti-codon=GCT; structure=">>>>>>>..>>>..........<<<.>>>>>.......<<<<<.>>>>...<<<<..>>>>>.......<<<<<<<<<<<<.";
LG22	tRNAscan-SE	tRNA	16347240	16347311	25.77	+	.	ID=tRNA_0075; Type=Pseudo; Anti-codon=CCC; structure=">>>>>..>>.>........<.<<.>>>...........<<<......>>>>.......<<<<.<<<...<<.";
LG22	tRNAscan-SE	tRNA	16576934	16577008	30.94	-	.	ID=tRNA_0081; Type=Pseudo; Anti-codon=CCC; structure=">>..>.>..>>............<<.>>>...........<<<.....>>>>>.......<<<..<<<.<..<<.";
LG22	tRNAscan-SE	tRNA	16621388	16621459	25	-	.	ID=tRNA_0080; Type=Pseudo; Anti-codon=TTC; structure=">.>>.>>..>.>..........<.<.>..>.........<..<......>>>.......<<<..<<.<<.<.";
LG22	tRNAscan-SE	tRNA	16626773	16626855	26.07	-	.	ID=tRNA_0079; Type=Pseudo; Anti-codon=CCC; structure=">>..>.>..>>............<<.>>>...........<<<...>>><<<....>>>>>.......<<<..<<<.<..<<.";
LG22	tRNAscan-SE	tRNA	18254279	18254351	77.5	-	.	ID=tRNA_0077; Type=Lys; Anti-codon=CTT; structure=">>>>>>>..>>>>........<<<<.>>>>>.......<<<<<.....>>>>>.......<<<<<<<<<<<<.";
LG22	tRNAscan-SE	tRNA	18816811	18816885	39.56	-	.	ID=tRNA_0066; Type=Pseudo; Anti-codon=CCC; structure=">>..>.>..>>>..........<<<.>>>...........<<<.....>>>>>.......<<<..<<<.<..<<.";
LG22	tRNAscan-SE	tRNA	19379609	19379681	65.99	-	.	ID=tRNA_0055; Type=Arg; Anti-codon=TCG; structure=">>>>>>>..>>>>........<<<<.>>>>>.......<<<<<.....>>>>>.......<<<<<<<<<<<<.";
LG22	tRNAscan-SE	tRNA	19983683	19983754	71.93	+	.	ID=tRNA_0076; Type=Pro; Anti-codon=CGG; structure=">>>>>>>..>>>.........<<<.>>>>>.......<<<<<.....>>>>>.......<<<<<<<<<<<<.";
LG22	tRNAscan-SE	tRNA	19984013	19984084	37.93	+	.	ID=tRNA_0078; Type=Pseudo; Anti-codon=TGG; structure=">>>>>.>..>>>.........<<<.>>.>>.......<<.<<.....>>>>>.......<<<<<<.<<<<<.";
LG22	tRNAscan-SE	tRNA	20176807	20176878	72.31	-	.	ID=tRNA_0044; Type=Glu; Anti-codon=CTC; structure=">>>>>>>..>>>>........<<<<.>>>>>.......<<<<<....>>>>>.......<<<<<<<<<<<<.";
LG22	tRNAscan-SE	tRNA	20787204	20787278	30.94	-	.	ID=tRNA_0033; Type=Pseudo; Anti-codon=CCC; structure=">>..>.>..>>............<<.>>>...........<<<.....>>>>>.......<<<..<<<.<..<<.";
LG22	tRNAscan-SE	tRNA	22813951	22814033	21.19	-	.	ID=tRNA_0022; Type=Pseudo; Anti-codon=CCC; structure=">>..>.>..>>............<<.>>>...........<<<...>>><<<....>>>>>.......<<<..<<<.<..<<.";
LG22	tRNAscan-SE	tRNA	23263738	23263809	76.83	+	.	ID=tRNA_0027; Type=Gly; Anti-codon=TCC; structure=">>>>>>>..>>.>........<.<<.>>>>>.......<<<<<....>>>>>.......<<<<<<<<<<<<.";
LG22	tRNAscan-SE	tRNA	23264857	23264928	76.83	-	.	ID=tRNA_0033; Type=Gly; Anti-codon=TCC; structure=">>>>>>>..>>.>........<.<<.>>>>>.......<<<<<....>>>>>.......<<<<<<<<<<<<.";
LG22	tRNAscan-SE	tRNA	24422205	24422276	34.21	+	.	ID=tRNA_0028; Type=Pseudo; Anti-codon=TCT; structure=".>>>.>>..>>.>........<.<<..>>>.........<<<.....>>.>>.......<<.<<<<.<<<..";
LG22	tRNAscan-SE	tRNA	24424828	24424899	31.27	+	.	ID=tRNA_0029; Type=Pseudo; Anti-codon=TCC; structure=".>>>.>>..>>.>........<.<<..>>>.........<<<.....>>.>>.......<<.<<<<.<<<..";
LG22	tRNAscan-SE	tRNA	24427589	24427660	21.33	-	.	ID=tRNA_0032; Type=Pseudo; Anti-codon=TTT; structure=".>>..>>..>>>>........<<<<..>>>.........<<<.....>>.>>.......<<.<<<<..<<..";
LG22	tRNAscan-SE	tRNA	24432457	24432528	21.33	-	.	ID=tRNA_0031; Type=Pseudo; Anti-codon=TTT; structure=".>>..>>..>>>>........<<<<..>>>.........<<<.....>>.>>.......<<.<<<<..<<..";
LG22	tRNAscan-SE	tRNA	24438136	24438207	31.27	+	.	ID=tRNA_0030; Type=Pseudo; Anti-codon=TCC; structure=".>>>.>>..>>.>........<.<<..>>>.........<<<.....>>.>>.......<<.<<<<.<<<..";
LG23	tRNAscan-SE	tRNA	425118	425190	29	+	.	ID=tRNA_0140; Type=Pseudo; Anti-codon=ACC; structure=">>>.>..>>>>.......<<<<...>>>.........<<<......>.>>>.......<<<.<<.....<<<.";
LG23	tRNAscan-SE	tRNA	1102893	1102965	75.16	-	.	ID=tRNA_0203; Type=Thr; Anti-codon=TGT; structure=">>>>>>>..>>>>........<<<<.>>>>>.......<<<<<.....>>>>>.......<<<<<<<<<<<<.";
LG23	tRNAscan-SE	tRNA	1103342	1103414	79.46	-	.	ID=tRNA_0202; Type=Thr; Anti-codon=TGT; structure=">>>>>>>..>>>>........<<<<.>>>>>.......<<<<<.....>>>>>.......<<<<<<<<<<<<.";
LG23	tRNAscan-SE	tRNA	1105102	1105174	79.46	-	.	ID=tRNA_0201; Type=Thr; Anti-codon=TGT; structure=">>>>>>>..>>>>........<<<<.>>>>>.......<<<<<.....>>>>>.......<<<<<<<<<<<<.";
LG23	tRNAscan-SE	tRNA	1105538	1105610	75.16	-	.	ID=tRNA_0200; Type=Thr; Anti-codon=TGT; structure=">>>>>>>..>>>>........<<<<.>>>>>.......<<<<<.....>>>>>.......<<<<<<<<<<<<.";
LG23	tRNAscan-SE	tRNA	1207215	1207286	66.44	-	.	ID=tRNA_0199; Type=Gly; Anti-codon=TCC; structure=">.>>>>>..>>.>........<.<<.>>>>>.......<<<<<....>>>>>.......<<<<<<<<<<.<.";
LG23	tRNAscan-SE	tRNA	2547341	2547413	24.14	+	.	ID=tRNA_0151; Type=Pseudo; Anti-codon=ACC; structure=">.>...>..>>>>.......<<<<...>>>.........<<<......>.>>>.......<<<.<<...<.<.";
LG23	tRNAscan-SE	tRNA	2864973	2865054	61.95	+	.	ID=tRNA_0162; Type=Ser; Anti-codon=TGA; structure=">>>>>>>..>>>..........<<<.>>>>>.......<<<<<.>>>>...<<<<..>>>.>.......<.<<<<<<<<<<.";
LG23	tRNAscan-SE	tRNA	2865591	2865662	46.34	-	.	ID=tRNA_0198; Type=Glu; Anti-codon=CTC; structure=">>>>>>>..>>>>........<<<<..>>>.......<<<.......>>>>.........<<<<<<<<<<<.";
LG23	tRNAscan-SE	tRNA	2865862	2865943	78.5	+	.	ID=tRNA_0173; Type=Ser; Anti-codon=AGA; structure=">>>>>>>..>>>..........<<<.>>>>>.......<<<<<.>>>>...<<<<..>>>.>.......<.<<<<<<<<<<.";
LG23	tRNAscan-SE	tRNA	2867750	2867831	83.52	+	.	ID=tRNA_0184; Type=Ser; Anti-codon=TGA; structure=">>>>>>>..>>>..........<<<.>>>>>.......<<<<<.>>>>...<<<<..>>>>>.......<<<<<<<<<<<<.";
LG23	tRNAscan-SE	tRNA	2868398	2868469	71.62	-	.	ID=tRNA_0197; Type=Glu; Anti-codon=CTC; structure=">>>>>>>..>>>>........<<<<.>>>>>.......<<<<<....>>>>>.......<<<<<<<<<<<<.";
LG23	tRNAscan-SE	tRNA	2868669	2868750	85.15	+	.	ID=tRNA_0195; Type=Ser; Anti-codon=AGA; structure=">>>>>>>..>>>..........<<<.>>>>>.......<<<<<.>>>>...<<<<..>>>>>.......<<<<<<<<<<<<.";
LG23	tRNAscan-SE	tRNA	2870599	2870682	74.11	+	.	ID=tRNA_0204; Type=Ser; Anti-codon=TGA; structure=">>>>>>>..>>>..........<<<.>>>>>.......<<<<<..>.>......<.<..>>>>>.......<<<<<<<<<<<<.";
LG23	tRNAscan-SE	tRNA	2871254	2871324	56.85	-	.	ID=tRNA_0196; Type=Glu; Anti-codon=CTC; structure=">>>>>>>..>>>>........<<<<.>>>>.......<<<.<....>>>>>.......<<<<<<<<<<<<.";
LG23	tRNAscan-SE	tRNA	2871524	2871604	85.47	+	.	ID=tRNA_0205; Type=Ser; Anti-codon=AGA; structure=">>>>>>>..>>>..........<<<.>>>>>.......<<<<<..>>>...<<<..>>>>>.......<<<<<<<<<<<<.";
LG23	tRNAscan-SE	tRNA	2873448	2873529	83.52	+	.	ID=tRNA_0206; Type=Ser; Anti-codon=TGA; structure=">>>>>>>..>>>..........<<<.>>>>>.......<<<<<.>>>>...<<<<..>>>>>.......<<<<<<<<<<<<.";
LG23	tRNAscan-SE	tRNA	2874082	2874152	61.22	-	.	ID=tRNA_0194; Type=Glu; Anti-codon=CTC; structure=">>>>>>>..>>>>........<<<<..>>>>.......<<<<....>>>>>.......<<<<<<<<<<<<.";
LG23	tRNAscan-SE	tRNA	2874352	2874433	85.15	+	.	ID=tRNA_0141; Type=Ser; Anti-codon=AGA; structure=">>>>>>>..>>>..........<<<.>>>>>.......<<<<<.>>>>...<<<<..>>>>>.......<<<<<<<<<<<<.";
LG23	tRNAscan-SE	tRNA	2876280	2876361	83.52	+	.	ID=tRNA_0142; Type=Ser; Anti-codon=TGA; structure=">>>>>>>..>>>..........<<<.>>>>>.......<<<<<.>>>>...<<<<..>>>>>.......<<<<<<<<<<<<.";
LG23	tRNAscan-SE	tRNA	2876899	2876970	75.92	-	.	ID=tRNA_0193; Type=Glu; Anti-codon=CTC; structure=">>>>>>>..>>>>........<<<<.>>>>>.......<<<<<....>>>>>.......<<<<<<<<<<<<.";
LG23	tRNAscan-SE	tRNA	2877170	2877251	85.15	+	.	ID=tRNA_0143; Type=Ser; Anti-codon=AGA; structure=">>>>>>>..>>>..........<<<.>>>>>.......<<<<<.>>>>...<<<<..>>>>>.......<<<<<<<<<<<<.";
LG23	tRNAscan-SE	tRNA	3379061	3379136	24.23	-	.	ID=tRNA_0192; Type=Pseudo; Anti-codon=ACC; structure=">>>>.>>.....>>>>.......<<<<...>>>.........<<<......>.>>>.......<<<.<<<.<<<<.";
LG23	tRNAscan-SE	tRNA	3390108	3390218	65.84	-	.	ID=tRNA_0191; Type=Leu; Anti-codon=CAA; structure=">>>>>>>..>>>...........<<<.>>>>>..................................<<<<<.>>>>>..<<<<<..>>>>>.......<<<<<<<<<<<<.";
LG23	tRNAscan-SE	tRNA	6002942	6003015	30.91	+	.	ID=tRNA_0144; Type=Pseudo; Anti-codon=ACC; structure=">>>.>.>>..>>>>.......<<<<..>.>>.........<<<......>>.>>.......<<.<<<<.<<<<.";
LG23	tRNAscan-SE	tRNA	7697519	7697605	45.84	+	.	ID=tRNA_0145; Type=Sup; Anti-codon=TTA; structure=">>>>>>>...>>>........<<<..>>>>>.....................<<<<<.....>>>>>.......<<<<<<<<<<<<.";
LG23	tRNAscan-SE	tRNA	7697996	7698082	74.84	+	.	ID=tRNA_0146; Type=Tyr; Anti-codon=GTA; structure=">>>>>>>..>>>>........<<<<.>>>>>.....................<<<<<.....>>>>>.......<<<<<<<<<<<<.";
LG23	tRNAscan-SE	tRNA	7698416	7698502	76.25	+	.	ID=tRNA_0147; Type=Tyr; Anti-codon=GTA; structure=">>>>>>>..>>>>........<<<<.>>>>>.....................<<<<<.....>>>>>.......<<<<<<<<<<<<.";
LG23	tRNAscan-SE	tRNA	7698787	7698873	68.52	+	.	ID=tRNA_0148; Type=Tyr; Anti-codon=GTA; structure=">>>>>>>..>>>>........<<<<.>>>>>.....................<<<<<.....>>>>>.......<<<<<<<<<<<<.";
LG23	tRNAscan-SE	tRNA	7699152	7699238	43.41	+	.	ID=tRNA_0149; Type=Tyr; Anti-codon=GTA; structure=">>>>>>>...>>>........<<<..>>>>.......................<<<<.......>>>.......<<<..<<<<<<<.";
LG23	tRNAscan-SE	tRNA	7699957	7700068	42.38	+	.	ID=tRNA_0150; Type=Tyr; Anti-codon=GTA; structure=">>>>>>>..>>>>........<<<<.>>>>.................................................<<<<....>>>>>.......<<<<<<<<<<<<.";
LG23	tRNAscan-SE	tRNA	7701006	7701092	74.7	-	.	ID=tRNA_0190; Type=Tyr; Anti-codon=GTA; structure=">>>>>>>..>>>>........<<<<.>>>>>.....................<<<<<.....>>>>>.......<<<<<<<<<<<<.";
LG23	tRNAscan-SE	tRNA	10463865	10463940	29.57	+	.	ID=tRNA_0152; Type=Glu; Anti-codon=CTC; structure=">.>.>.>..>>>>........<<<<.>>>>>.......<<<<<....>>>>>.......<<<<<....<.<.<.<.";
LG23	tRNAscan-SE	tRNA	11125422	11125494	80.47	+	.	ID=tRNA_0153; Type=Lys; Anti-codon=CTT; structure=">>>>>>>..>>>>........<<<<.>>>>>.......<<<<<.....>>>>>.......<<<<<<<<<<<<.";
LG23	tRNAscan-SE	tRNA	11126021	11126131	67.06	+	.	ID=tRNA_0154; Type=Leu; Anti-codon=CAA; structure=">>>>>>>..>>>...........<<<.>>>>>..................................<<<<<.>>>>....<<<<..>>>>>.......<<<<<<<<<<<<.";
LG23	tRNAscan-SE	tRNA	11127169	11127279	67.06	+	.	ID=tRNA_0155; Type=Leu; Anti-codon=CAA; structure=">>>>>>>..>>>...........<<<.>>>>>..................................<<<<<.>>>>....<<<<..>>>>>.......<<<<<<<<<<<<.";
LG23	tRNAscan-SE	tRNA	11128322	11128432	66.92	+	.	ID=tRNA_0156; Type=Leu; Anti-codon=CAA; structure=">>>>>>>..>>>...........<<<.>>>>>..................................<<<<<.>>>>....<<<<..>>>>>.......<<<<<<<<<<<<.";
LG23	tRNAscan-SE	tRNA	11129475	11129585	66.92	+	.	ID=tRNA_0157; Type=Leu; Anti-codon=CAA; structure=">>>>>>>..>>>...........<<<.>>>>>..................................<<<<<.>>>>....<<<<..>>>>>.......<<<<<<<<<<<<.";
LG23	tRNAscan-SE	tRNA	11130625	11130735	66.92	+	.	ID=tRNA_0158; Type=Leu; Anti-codon=CAA; structure=">>>>>>>..>>>...........<<<.>>>>>..................................<<<<<.>>>>....<<<<..>>>>>.......<<<<<<<<<<<<.";
LG23	tRNAscan-SE	tRNA	11131781	11131891	67.06	+	.	ID=tRNA_0159; Type=Leu; Anti-codon=CAA; structure=">>>>>>>..>>>...........<<<.>>>>>..................................<<<<<.>>>>....<<<<..>>>>>.......<<<<<<<<<<<<.";
LG23	tRNAscan-SE	tRNA	11132932	11133042	66.28	+	.	ID=tRNA_0160; Type=Leu; Anti-codon=CAA; structure=">>>>>>>..>>>...........<<<.>>>>>..................................<<<<<.>>>>....<<<<..>>>>>.......<<<<<<<<<<<<.";
LG23	tRNAscan-SE	tRNA	11134086	11134196	66.92	+	.	ID=tRNA_0161; Type=Leu; Anti-codon=CAA; structure=">>>>>>>..>>>...........<<<.>>>>>..................................<<<<<.>>>>....<<<<..>>>>>.......<<<<<<<<<<<<.";
LG23	tRNAscan-SE	tRNA	11135242	11135352	66.92	+	.	ID=tRNA_0163; Type=Leu; Anti-codon=CAA; structure=">>>>>>>..>>>...........<<<.>>>>>..................................<<<<<.>>>>....<<<<..>>>>>.......<<<<<<<<<<<<.";
LG23	tRNAscan-SE	tRNA	11136399	11136509	66.92	+	.	ID=tRNA_0164; Type=Leu; Anti-codon=CAA; structure=">>>>>>>..>>>...........<<<.>>>>>..................................<<<<<.>>>>....<<<<..>>>>>.......<<<<<<<<<<<<.";
LG23	tRNAscan-SE	tRNA	11137552	11137661	53.46	+	.	ID=tRNA_0165; Type=Leu; Anti-codon=CAA; structure=">>>>>>>..>>>...........<<<.>>>>>..................................<<<<<.>>>>....<<<<..>>.>>.......<<<<<<<<<<<.";
LG23	tRNAscan-SE	tRNA	11138703	11138812	53.46	+	.	ID=tRNA_0166; Type=Leu; Anti-codon=CAA; structure=">>>>>>>..>>>...........<<<.>>>>>..................................<<<<<.>>>>....<<<<..>>.>>.......<<<<<<<<<<<.";
LG23	tRNAscan-SE	tRNA	11139857	11139966	62.02	+	.	ID=tRNA_0167; Type=Leu; Anti-codon=CAA; structure=">>>>>>>..>>>...........<<<.>>>>>..................................<<<<<.>>>.....<<<..>>>>>.......<<<<<<<<<<<<.";
LG23	tRNAscan-SE	tRNA	11141012	11141122	66.92	+	.	ID=tRNA_0168; Type=Leu; Anti-codon=CAA; structure=">>>>>>>..>>>...........<<<.>>>>>..................................<<<<<.>>>>....<<<<..>>>>>.......<<<<<<<<<<<<.";
LG23	tRNAscan-SE	tRNA	11143230	11143340	67.06	+	.	ID=tRNA_0169; Type=Leu; Anti-codon=CAA; structure=">>>>>>>..>>>...........<<<.>>>>>..................................<<<<<.>>>>....<<<<..>>>>>.......<<<<<<<<<<<<.";
LG23	tRNAscan-SE	tRNA	11175159	11175269	49.76	+	.	ID=tRNA_0170; Type=Leu; Anti-codon=CAA; structure=">>>>>>>..>>>...........<<<.>>>>>..................................<<<<<.>>>>>..<<<<<..>.>.>.......<.<.<<<<<<<<.";
LG23	tRNAscan-SE	tRNA	11183456	11183528	81.11	-	.	ID=tRNA_0189; Type=Lys; Anti-codon=CTT; structure=">>>>>>>..>>>>........<<<<.>>>>>.......<<<<<.....>>>>>.......<<<<<<<<<<<<.";
LG23	tRNAscan-SE	tRNA	11184845	11184917	80.47	-	.	ID=tRNA_0188; Type=Lys; Anti-codon=CTT; structure=">>>>>>>..>>>>........<<<<.>>>>>.......<<<<<.....>>>>>.......<<<<<<<<<<<<.";
LG23	tRNAscan-SE	tRNA	11186581	11186653	80.47	-	.	ID=tRNA_0187; Type=Lys; Anti-codon=CTT; structure=">>>>>>>..>>>>........<<<<.>>>>>.......<<<<<.....>>>>>.......<<<<<<<<<<<<.";
LG23	tRNAscan-SE	tRNA	11187976	11188048	80.47	-	.	ID=tRNA_0186; Type=Lys; Anti-codon=CTT; structure=">>>>>>>..>>>>........<<<<.>>>>>.......<<<<<.....>>>>>.......<<<<<<<<<<<<.";
LG23	tRNAscan-SE	tRNA	11189465	11189537	80.47	-	.	ID=tRNA_0185; Type=Lys; Anti-codon=CTT; structure=">>>>>>>..>>>>........<<<<.>>>>>.......<<<<<.....>>>>>.......<<<<<<<<<<<<.";
LG23	tRNAscan-SE	tRNA	11191422	11191494	80.47	-	.	ID=tRNA_0183; Type=Lys; Anti-codon=CTT; structure=">>>>>>>..>>>>........<<<<.>>>>>.......<<<<<.....>>>>>.......<<<<<<<<<<<<.";
LG23	tRNAscan-SE	tRNA	11193376	11193448	80.47	-	.	ID=tRNA_0182; Type=Lys; Anti-codon=CTT; structure=">>>>>>>..>>>>........<<<<.>>>>>.......<<<<<.....>>>>>.......<<<<<<<<<<<<.";
LG23	tRNAscan-SE	tRNA	11194766	11194838	80.47	-	.	ID=tRNA_0181; Type=Lys; Anti-codon=CTT; structure=">>>>>>>..>>>>........<<<<.>>>>>.......<<<<<.....>>>>>.......<<<<<<<<<<<<.";
LG23	tRNAscan-SE	tRNA	11196156	11196228	80.47	-	.	ID=tRNA_0180; Type=Lys; Anti-codon=CTT; structure=">>>>>>>..>>>>........<<<<.>>>>>.......<<<<<.....>>>>>.......<<<<<<<<<<<<.";
LG23	tRNAscan-SE	tRNA	11197543	11197615	80.47	-	.	ID=tRNA_0179; Type=Lys; Anti-codon=CTT; structure=">>>>>>>..>>>>........<<<<.>>>>>.......<<<<<.....>>>>>.......<<<<<<<<<<<<.";
LG23	tRNAscan-SE	tRNA	11207147	11207219	80.47	-	.	ID=tRNA_0178; Type=Lys; Anti-codon=CTT; structure=">>>>>>>..>>>>........<<<<.>>>>>.......<<<<<.....>>>>>.......<<<<<<<<<<<<.";
LG23	tRNAscan-SE	tRNA	11218384	11218494	65.18	+	.	ID=tRNA_0171; Type=Leu; Anti-codon=CAA; structure=">>>>>>>..>>>...........<<<.>>>>>..................................<<<<<.>>>>....<<<<..>>>>>.......<<<<<<<<<<<<.";
LG23	tRNAscan-SE	tRNA	11219118	11219190	80.47	+	.	ID=tRNA_0172; Type=Lys; Anti-codon=CTT; structure=">>>>>>>..>>>>........<<<<.>>>>>.......<<<<<.....>>>>>.......<<<<<<<<<<<<.";
LG23	tRNAscan-SE	tRNA	11219449	11219559	56.4	+	.	ID=tRNA_0174; Type=Leu; Anti-codon=CAA; structure=">>>>>>>..>>>...........<<<.>>>>>..................................<<<<<.>>>>>..<<<<<..>>>>>.......<<<<<<<<<<<<.";
LG23	tRNAscan-SE	tRNA	11220087	11220159	80.47	+	.	ID=tRNA_0175; Type=Lys; Anti-codon=CTT; structure=">>>>>>>..>>>>........<<<<.>>>>>.......<<<<<.....>>>>>.......<<<<<<<<<<<<.";
LG23	tRNAscan-SE	tRNA	12866379	12866453	30.94	-	.	ID=tRNA_0177; Type=Pseudo; Anti-codon=CCC; structure=">>..>.>..>>............<<.>>>...........<<<.....>>>>>.......<<<..<<<.<..<<.";
LG23	tRNAscan-SE	tRNA	14790600	14790672	80.47	+	.	ID=tRNA_0176; Type=Lys; Anti-codon=CTT; structure=">>>>>>>..>>>>........<<<<.>>>>>.......<<<<<.....>>>>>.......<<<<<<<<<<<<.";
LG23	tRNAscan-SE	tRNA	16521044	16521115	70.44	+	.	ID=tRNA_0055; Type=Gln; Anti-codon=TTG; structure=">>>>>>>..>>>>........<<<<.>>>>>.......<<<<<....>>>>>.......<<<<<<<<<<<<.";
LG23	tRNAscan-SE	tRNA	16817098	16817169	65.72	-	.	ID=tRNA_0072; Type=Gln; Anti-codon=CTG; structure=">>>>>>>..>>>>........<<<<.>>>>>.......<<<<<....>>>>>.......<<<<<<<<<<<<.";
LG23	tRNAscan-SE	tRNA	16817816	16817898	71.48	-	.	ID=tRNA_0071; Type=Leu; Anti-codon=CAG; structure=">>>>>>>..>>>...........<<<.>>>>>.......<<<<<.>>>>...<<<<..>>>>>.......<<<<<<<<<<<<.";
LG23	tRNAscan-SE	tRNA	16818115	16818186	73.65	-	.	ID=tRNA_0070; Type=Gln; Anti-codon=CTG; structure=">>>>>>>..>>>>........<<<<.>>>>>.......<<<<<....>>>>>.......<<<<<<<<<<<<.";
LG23	tRNAscan-SE	tRNA	16818833	16818914	54.24	-	.	ID=tRNA_0069; Type=Leu; Anti-codon=CAG; structure=">>>>>.>..>>............<<.>>>>>.......<<<<<.>>>>...<<<<..>>>>>.......<<<<<<.<<<<<.";
LG23	tRNAscan-SE	tRNA	16819129	16819200	65.74	-	.	ID=tRNA_0068; Type=Gln; Anti-codon=CTG; structure=">>>>>>>..>>>>........<<<<.>>>>>.......<<<<<....>>>>>.......<<<<<<<<<<<<.";
LG23	tRNAscan-SE	tRNA	16820807	16820889	66.9	-	.	ID=tRNA_0067; Type=Leu; Anti-codon=CAG; structure=">>>>>.>..>>>...........<<<.>>>>>.......<<<<<.>>>>...<<<<..>>>>>.......<<<<<<.<<<<<.";
LG23	tRNAscan-SE	tRNA	16821105	16821176	73.65	-	.	ID=tRNA_0065; Type=Gln; Anti-codon=CTG; structure=">>>>>>>..>>>>........<<<<.>>>>>.......<<<<<....>>>>>.......<<<<<<<<<<<<.";
LG23	tRNAscan-SE	tRNA	16822784	16822866	71.48	-	.	ID=tRNA_0064; Type=Leu; Anti-codon=CAG; structure=">>>>>>>..>>>...........<<<.>>>>>.......<<<<<.>>>>...<<<<..>>>>>.......<<<<<<<<<<<<.";
LG23	tRNAscan-SE	tRNA	16823092	16823163	69.35	-	.	ID=tRNA_0063; Type=Gln; Anti-codon=CTG; structure=">>>>>>>..>>>>........<<<<.>>>>>.......<<<<<....>>>>>.......<<<<<<<<<<<<.";
LG23	tRNAscan-SE	tRNA	16825039	16825121	65.19	-	.	ID=tRNA_0062; Type=Leu; Anti-codon=CAG; structure=">>>>>.>..>>>...........<<<.>>>>>.......<<<<<.>>>>...<<<<..>>>>>.......<<<<<<.<<<<<.";
LG23	tRNAscan-SE	tRNA	16825337	16825408	73.65	-	.	ID=tRNA_0061; Type=Gln; Anti-codon=CTG; structure=">>>>>>>..>>>>........<<<<.>>>>>.......<<<<<....>>>>>.......<<<<<<<<<<<<.";
LG23	tRNAscan-SE	tRNA	16827019	16827101	71.48	-	.	ID=tRNA_0060; Type=Leu; Anti-codon=CAG; structure=">>>>>>>..>>>...........<<<.>>>>>.......<<<<<.>>>>...<<<<..>>>>>.......<<<<<<<<<<<<.";
LG23	tRNAscan-SE	tRNA	16827327	16827398	73.65	-	.	ID=tRNA_0059; Type=Gln; Anti-codon=CTG; structure=">>>>>>>..>>>>........<<<<.>>>>>.......<<<<<....>>>>>.......<<<<<<<<<<<<.";
LG23	tRNAscan-SE	tRNA	16829005	16829086	54.01	-	.	ID=tRNA_0058; Type=Leu; Anti-codon=CAG; structure=">>>>>>>..>>>..........<<<.>>>>>.......<<<<<.>>>>...<<<<..>>>>>.......<<<<<<<<<<<<.";
LG23	tRNAscan-SE	tRNA	16829301	16829372	71.2	-	.	ID=tRNA_0057; Type=Gln; Anti-codon=CTG; structure=">>>>>>>..>>>>........<<<<.>>>>>.......<<<<<....>>>>>.......<<<<<<<<<<<<.";
LG23	tRNAscan-SE	tRNA	16831177	16831248	73.65	-	.	ID=tRNA_0056; Type=Gln; Anti-codon=CTG; structure=">>>>>>>..>>>>........<<<<.>>>>>.......<<<<<....>>>>>.......<<<<<<<<<<<<.";
LG23	tRNAscan-SE	tRNA	16841382	16841464	71.48	-	.	ID=tRNA_0079; Type=Leu; Anti-codon=CAG; structure=">>>>>>>..>>>...........<<<.>>>>>.......<<<<<.>>>>...<<<<..>>>>>.......<<<<<<<<<<<<.";
LG23	tRNAscan-SE	tRNA	17928583	17928654	71.61	-	.	ID=tRNA_0078; Type=Gln; Anti-codon=TTG; structure=">>>>>>>..>>>>........<<<<.>>>>>.......<<<<<....>>>>>.......<<<<<<<<<<<<.";
LG23	tRNAscan-SE	tRNA	18770119	18770190	20.26	-	.	ID=tRNA_0077; Type=Pseudo; Anti-codon=ACC; structure=".>>>>....>>>.........<<<...>>>.........<<<.......>>>>.......<<<<..<<<<..";
LG23	tRNAscan-SE	tRNA	19125229	19125299	23.17	-	.	ID=tRNA_0076; Type=Pseudo; Anti-codon=CTC; structure=">>>.>>...>>.......<<.....>>>.........<<<......>.>>>.......<<<.<.<<.<<<.";
LG23	tRNAscan-SE	tRNA	19601787	19601874	77.76	+	.	ID=tRNA_0066; Type=Tyr; Anti-codon=GTA; structure=">>>>>>>..>>>>........<<<<.>>>>>......................<<<<<.....>>>>>.......<<<<<<<<<<<<.";
LG23	tRNAscan-SE	tRNA	19706423	19706494	26.94	+	.	ID=tRNA_0073; Type=Pseudo; Anti-codon=AGA; structure=">>>>>.>..>>>>........<<<<...>>.........<<.........>>>......<<<..<.<<<<<.";
LG23	tRNAscan-SE	tRNA	21589941	21590011	59.59	+	.	ID=tRNA_0074; Type=Gly; Anti-codon=TCC; structure=">>>>>>>..>>.>........<.<<.>>>>>.......<<<<<....>>.>>.......<<<<<<<<<<<.";
LG23	tRNAscan-SE	tRNA	21593940	21594011	73.04	+	.	ID=tRNA_0075; Type=Gly; Anti-codon=TCC; structure=">>>>>>>..>>.>........<.<<.>>>>>.......<<<<<....>>>>>.......<<<<<<<<<<<<.";
LG24	tRNAscan-SE	tRNA	634088	634161	40.99	-	.	ID=tRNA_0026; Type=Pseudo; Anti-codon=CCT; structure=">>>>>>>..>>>>........<<<<.>>.>>.......<<.<<....>>.>>.......<<.<<<<..<<<<<.";
LG24	tRNAscan-SE	tRNA	934763	934834	30.23	+	.	ID=tRNA_0025; Type=Pseudo; Anti-codon=TCC; structure=".>.>>>>..>>>>........<<<<.>>>>>.......<<<<<....>>.>>.......<<.<<<<<<.<..";
LG24	tRNAscan-SE	tRNA	5181535	5181608	48.06	+	.	ID=tRNA_0001; Type=Ile; Anti-codon=AAT; structure=">>>>>>>..>.>>.........<<.<.>.>>.........<<.<.....>>>>>.......<<<<<<<<<<<<.";
LG24	tRNAscan-SE	tRNA	5182008	5182080	65.54	+	.	ID=tRNA_0024; Type=Arg; Anti-codon=TCG; structure=">>>>>>>..>>>>........<<<<.>>>>>.......<<<<<.....>>>>>.......<<<<<<<<<<<<.";
LG24	tRNAscan-SE	tRNA	5183026	5183099	62.07	+	.	ID=tRNA_0035; Type=Ile; Anti-codon=AAT; structure=">>>>>.>..>>>>.........<<<<.>>>>>.......<<<<<.....>>>>>.......<<<<<<.<<<<<.";
LG24	tRNAscan-SE	tRNA	5183619	5183690	51.51	+	.	ID=tRNA_0046; Type=Undet; Anti-codon=???; structure=">>>>>>>..>>>>.........<<<<.>>>>>......<<<<<.....>>>>>......<<<<<<<<<<<<.";
LG24	tRNAscan-SE	tRNA	5184165	5184238	54.41	+	.	ID=tRNA_0057; Type=Ile; Anti-codon=AAT; structure=">>>>>>...>>>>.........<<<<.>>>>>.......<<<<<.....>>>>>.......<<<<<.<<<<<<.";
LG24	tRNAscan-SE	tRNA	5184765	5184838	67.97	+	.	ID=tRNA_0068; Type=Ile; Anti-codon=AAT; structure=">>>>>>>..>>>>.........<<<<.>>>>>.......<<<<<.....>>>>>.......<<<<<<<<<<<<.";
LG24	tRNAscan-SE	tRNA	5185187	5185259	61.54	+	.	ID=tRNA_0079; Type=Ile; Anti-codon=AAT; structure=">>>>>>>..>>>>.........<<<<.>>>>>.......<<<<<.....>>>>>......<<<<<<<<<<<<.";
LG24	tRNAscan-SE	tRNA	5185726	5185799	54.41	+	.	ID=tRNA_0090; Type=Ile; Anti-codon=AAT; structure=">>>>>>...>>>>.........<<<<.>>>>>.......<<<<<.....>>>>>.......<<<<<.<<<<<<.";
LG24	tRNAscan-SE	tRNA	5186318	5186391	67.97	+	.	ID=tRNA_0101; Type=Ile; Anti-codon=AAT; structure=">>>>>>>..>>>>.........<<<<.>>>>>.......<<<<<.....>>>>>.......<<<<<<<<<<<<.";
LG24	tRNAscan-SE	tRNA	5186861	5186934	54.41	+	.	ID=tRNA_0002; Type=Ile; Anti-codon=AAT; structure=">>>>>>...>>>>.........<<<<.>>>>>.......<<<<<.....>>>>>.......<<<<<.<<<<<<.";
LG24	tRNAscan-SE	tRNA	5187449	5187521	61.54	+	.	ID=tRNA_0013; Type=Ile; Anti-codon=AAT; structure=">>>>>>>..>>>>.........<<<<.>>>>>.......<<<<<.....>>>>>......<<<<<<<<<<<<.";
LG24	tRNAscan-SE	tRNA	5187996	5188069	54.41	+	.	ID=tRNA_0016; Type=Ile; Anti-codon=AAT; structure=">>>>>>...>>>>.........<<<<.>>>>>.......<<<<<.....>>>>>.......<<<<<.<<<<<<.";
LG24	tRNAscan-SE	tRNA	5188582	5188655	67.97	+	.	ID=tRNA_0017; Type=Ile; Anti-codon=AAT; structure=">>>>>>>..>>>>.........<<<<.>>>>>.......<<<<<.....>>>>>.......<<<<<<<<<<<<.";
LG24	tRNAscan-SE	tRNA	5189127	5189200	54.41	+	.	ID=tRNA_0018; Type=Ile; Anti-codon=AAT; structure=">>>>>>...>>>>.........<<<<.>>>>>.......<<<<<.....>>>>>.......<<<<<.<<<<<<.";
LG24	tRNAscan-SE	tRNA	5189901	5189974	67.97	+	.	ID=tRNA_0019; Type=Ile; Anti-codon=AAT; structure=">>>>>>>..>>>>.........<<<<.>>>>>.......<<<<<.....>>>>>.......<<<<<<<<<<<<.";
LG24	tRNAscan-SE	tRNA	5190493	5190566	67.97	+	.	ID=tRNA_0020; Type=Ile; Anti-codon=AAT; structure=">>>>>>>..>>>>.........<<<<.>>>>>.......<<<<<.....>>>>>.......<<<<<<<<<<<<.";
LG24	tRNAscan-SE	tRNA	5191038	5191111	54.41	+	.	ID=tRNA_0021; Type=Ile; Anti-codon=AAT; structure=">>>>>>...>>>>.........<<<<.>>>>>.......<<<<<.....>>>>>.......<<<<<.<<<<<<.";
LG24	tRNAscan-SE	tRNA	5191379	5191451	65.54	+	.	ID=tRNA_0022; Type=Arg; Anti-codon=TCG; structure=">>>>>>>..>>>>........<<<<.>>>>>.......<<<<<.....>>>>>.......<<<<<<<<<<<<.";
LG24	tRNAscan-SE	tRNA	5191775	5191848	67.97	+	.	ID=tRNA_0023; Type=Ile; Anti-codon=AAT; structure=">>>>>>>..>>>>.........<<<<.>>>>>.......<<<<<.....>>>>>.......<<<<<<<<<<<<.";
LG24	tRNAscan-SE	tRNA	5192374	5192447	67.97	+	.	ID=tRNA_0025; Type=Ile; Anti-codon=AAT; structure=">>>>>>>..>>>>.........<<<<.>>>>>.......<<<<<.....>>>>>.......<<<<<<<<<<<<.";
LG24	tRNAscan-SE	tRNA	5192957	5193030	67.97	+	.	ID=tRNA_0026; Type=Ile; Anti-codon=AAT; structure=">>>>>>>..>>>>.........<<<<.>>>>>.......<<<<<.....>>>>>.......<<<<<<<<<<<<.";
LG24	tRNAscan-SE	tRNA	5193503	5193576	54.41	+	.	ID=tRNA_0027; Type=Ile; Anti-codon=AAT; structure=">>>>>>...>>>>.........<<<<.>>>>>.......<<<<<.....>>>>>.......<<<<<.<<<<<<.";
LG24	tRNAscan-SE	tRNA	5193993	5194066	62.07	+	.	ID=tRNA_0028; Type=Ile; Anti-codon=AAT; structure=">>>>>.>..>>>>.........<<<<.>>>>>.......<<<<<.....>>>>>.......<<<<<<.<<<<<.";
LG24	tRNAscan-SE	tRNA	5194334	5194406	58.44	+	.	ID=tRNA_0029; Type=Arg; Anti-codon=TCG; structure=">>>>>>>..>>>>........<<<<.>>>>>.......<<<<<.....>>>>>.......<<<<<<<<<<<<.";
LG24	tRNAscan-SE	tRNA	5194730	5194803	58.85	+	.	ID=tRNA_0030; Type=Ile; Anti-codon=AAT; structure=">>>>>>>..>>>>.........<<<<.>>>>>.......<<<<<.....>>>>.........<<<<<<<<<<<.";
LG24	tRNAscan-SE	tRNA	5195348	5195421	67.97	+	.	ID=tRNA_0031; Type=Ile; Anti-codon=AAT; structure=">>>>>>>..>>>>.........<<<<.>>>>>.......<<<<<.....>>>>>.......<<<<<<<<<<<<.";
LG24	tRNAscan-SE	tRNA	5195939	5196012	70.91	+	.	ID=tRNA_0032; Type=Ile; Anti-codon=AAT; structure=">>>>>>>..>>>>.........<<<<.>>>>>.......<<<<<.....>>>>>.......<<<<<<<<<<<<.";
LG24	tRNAscan-SE	tRNA	5196427	5196500	62.07	+	.	ID=tRNA_0033; Type=Ile; Anti-codon=AAT; structure=">>>>>.>..>>>>.........<<<<.>>>>>.......<<<<<.....>>>>>.......<<<<<<.<<<<<.";
LG24	tRNAscan-SE	tRNA	5196768	5196840	65.54	+	.	ID=tRNA_0034; Type=Arg; Anti-codon=TCG; structure=">>>>>>>..>>>>........<<<<.>>>>>.......<<<<<.....>>>>>.......<<<<<<<<<<<<.";
LG24	tRNAscan-SE	tRNA	5197164	5197237	70.91	+	.	ID=tRNA_0036; Type=Ile; Anti-codon=AAT; structure=">>>>>>>..>>>>.........<<<<.>>>>>.......<<<<<.....>>>>>.......<<<<<<<<<<<<.";
LG24	tRNAscan-SE	tRNA	5197654	5197727	62.07	+	.	ID=tRNA_0037; Type=Ile; Anti-codon=AAT; structure=">>>>>.>..>>>>.........<<<<.>>>>>.......<<<<<.....>>>>>.......<<<<<<.<<<<<.";
LG24	tRNAscan-SE	tRNA	5197995	5198067	65.54	+	.	ID=tRNA_0038; Type=Arg; Anti-codon=TCG; structure=">>>>>>>..>>>>........<<<<.>>>>>.......<<<<<.....>>>>>.......<<<<<<<<<<<<.";
LG24	tRNAscan-SE	tRNA	5198382	5198455	65.41	+	.	ID=tRNA_0039; Type=Ile; Anti-codon=AAT; structure=">>>>>>>..>>>>.........<<<<.>>>>>.......<<<<<.....>>>>>.......<<<<<<<<<<<<.";
LG24	tRNAscan-SE	tRNA	5198927	5199000	54.41	+	.	ID=tRNA_0040; Type=Ile; Anti-codon=AAT; structure=">>>>>>...>>>>.........<<<<.>>>>>.......<<<<<.....>>>>>.......<<<<<.<<<<<<.";
LG24	tRNAscan-SE	tRNA	5199518	5199591	67.97	+	.	ID=tRNA_0041; Type=Ile; Anti-codon=AAT; structure=">>>>>>>..>>>>.........<<<<.>>>>>.......<<<<<.....>>>>>.......<<<<<<<<<<<<.";
LG24	tRNAscan-SE	tRNA	5200063	5200135	55.99	+	.	ID=tRNA_0042; Type=Arg; Anti-codon=TCG; structure=">>>>>>>..>>>>........<<<<.>>>>>.......<<<<<.....>>>>>.......<<<<<<<<<<<<.";
LG24	tRNAscan-SE	tRNA	5200460	5200533	67.97	+	.	ID=tRNA_0043; Type=Ile; Anti-codon=AAT; structure=">>>>>>>..>>>>.........<<<<.>>>>>.......<<<<<.....>>>>>.......<<<<<<<<<<<<.";
LG24	tRNAscan-SE	tRNA	5201073	5201146	67.97	+	.	ID=tRNA_0044; Type=Ile; Anti-codon=AAT; structure=">>>>>>>..>>>>.........<<<<.>>>>>.......<<<<<.....>>>>>.......<<<<<<<<<<<<.";
LG24	tRNAscan-SE	tRNA	5201665	5201738	70.91	+	.	ID=tRNA_0045; Type=Ile; Anti-codon=AAT; structure=">>>>>>>..>>>>.........<<<<.>>>>>.......<<<<<.....>>>>>.......<<<<<<<<<<<<.";
LG24	tRNAscan-SE	tRNA	5202156	5202228	55.64	+	.	ID=tRNA_0047; Type=Ile; Anti-codon=AAT; structure=">>>>>.>..>>>>.........<<<<.>>>>>.......<<<<<.....>>>>>......<<<<<<.<<<<<.";
LG24	tRNAscan-SE	tRNA	5202494	5202565	57.39	+	.	ID=tRNA_0048; Type=Undet; Anti-codon=???; structure=">>>>>>>..>>>>........<<<<.>>>>>......<<<<<.....>>>>>.......<<<<<<<<<<<<.";
LG24	tRNAscan-SE	tRNA	5202889	5202962	65.41	+	.	ID=tRNA_0049; Type=Ile; Anti-codon=AAT; structure=">>>>>>>..>>>>.........<<<<.>>>>>.......<<<<<.....>>>>>.......<<<<<<<<<<<<.";
LG24	tRNAscan-SE	tRNA	5203435	5203507	47.98	+	.	ID=tRNA_0050; Type=Ile; Anti-codon=AAT; structure=">>>>>>...>>>>.........<<<<.>>>>>.......<<<<<.....>>>>>......<<<<<.<<<<<<.";
LG24	tRNAscan-SE	tRNA	5204024	5204096	61.54	+	.	ID=tRNA_0051; Type=Ile; Anti-codon=AAT; structure=">>>>>>>..>>>>.........<<<<.>>>>>.......<<<<<.....>>>>>......<<<<<<<<<<<<.";
LG24	tRNAscan-SE	tRNA	5204563	5204635	49.71	+	.	ID=tRNA_0052; Type=Arg; Anti-codon=TCG; structure=">>>>>>>..>>>>........<<<<..>>>>.......<<<<......>>>>>.......<<<<<<<<<<<<.";
LG24	tRNAscan-SE	tRNA	5204960	5205033	67.97	+	.	ID=tRNA_0053; Type=Ile; Anti-codon=AAT; structure=">>>>>>>..>>>>.........<<<<.>>>>>.......<<<<<.....>>>>>.......<<<<<<<<<<<<.";
LG24	tRNAscan-SE	tRNA	5205578	5205651	67.97	+	.	ID=tRNA_0054; Type=Ile; Anti-codon=AAT; structure=">>>>>>>..>>>>.........<<<<.>>>>>.......<<<<<.....>>>>>.......<<<<<<<<<<<<.";
LG24	tRNAscan-SE	tRNA	5206169	5206242	70.91	+	.	ID=tRNA_0055; Type=Ile; Anti-codon=AAT; structure=">>>>>>>..>>>>.........<<<<.>>>>>.......<<<<<.....>>>>>.......<<<<<<<<<<<<.";
LG24	tRNAscan-SE	tRNA	5206659	5206732	62.07	+	.	ID=tRNA_0056; Type=Ile; Anti-codon=AAT; structure=">>>>>.>..>>>>.........<<<<.>>>>>.......<<<<<.....>>>>>.......<<<<<<.<<<<<.";
LG24	tRNAscan-SE	tRNA	5206998	5207070	65.54	+	.	ID=tRNA_0058; Type=Arg; Anti-codon=TCG; structure=">>>>>>>..>>>>........<<<<.>>>>>.......<<<<<.....>>>>>.......<<<<<<<<<<<<.";
LG24	tRNAscan-SE	tRNA	5207394	5207467	66.46	+	.	ID=tRNA_0059; Type=Ile; Anti-codon=AAT; structure=">>>>>>>..>>>>.........<<<<.>>>>>.......<<<<<.....>>>>>.......<<<<<<<<<<<<.";
LG24	tRNAscan-SE	tRNA	5207830	5207903	29.26	+	.	ID=tRNA_0060; Type=Ile; Anti-codon=AAT; structure=">.>.>>>..>>>>.........<<<<.>>>>>.......<<<<<......>>.>.......<.<<.<<<.<.<.";
LG24	tRNAscan-SE	tRNA	5211605	5211677	65.27	+	.	ID=tRNA_0061; Type=Arg; Anti-codon=CCT; structure=">>>>>>>..>>>>........<<<<.>>>>>.......<<<<<.....>>>>>.......<<<<<<<<<<<<.";
LG24	tRNAscan-SE	tRNA	5219840	5219914	39.92	-	.	ID=tRNA_0015; Type=Ile; Anti-codon=AAT; structure=">>>>>>>..>>.>.........<.<<.>>>>>.......<<<<<.....>.>>>.......<<<.<<<<<.<<<.";
LG24	tRNAscan-SE	tRNA	5226860	5226932	70.63	+	.	ID=tRNA_0062; Type=Arg; Anti-codon=CCT; structure=">>>>>>>..>>>>........<<<<.>>>>>.......<<<<<.....>>>>>.......<<<<<<<<<<<<.";
LG24	tRNAscan-SE	tRNA	5227143	5227215	52.86	+	.	ID=tRNA_0063; Type=Arg; Anti-codon=CCT; structure=">>>>>>>..>>.>........<.<<.>>>>>.......<<<<<.....>>>>>.......<<<<<<<<<<<<.";
LG24	tRNAscan-SE	tRNA	5227306	5227382	24.1	+	.	ID=tRNA_0064; Type=Undet; Anti-codon=???; structure=">>>>.>>>..>>>>........<<<<....>>>>........<<<<......>>>>>.......<<<<<<<<<<<<.";
LG24	tRNAscan-SE	tRNA	5227602	5227674	71.67	+	.	ID=tRNA_0065; Type=Arg; Anti-codon=CCT; structure=">>>>>>>..>>>>........<<<<.>>>>>.......<<<<<.....>>>>>.......<<<<<<<<<<<<.";
LG24	tRNAscan-SE	tRNA	5233611	5233683	68.89	-	.	ID=tRNA_0014; Type=Arg; Anti-codon=CCT; structure=">>>>>>>..>>>>........<<<<.>>>>>.......<<<<<.....>>>>>.......<<<<<<<<<<<<.";
LG24	tRNAscan-SE	tRNA	5260332	5260405	77.36	-	.	ID=tRNA_0012; Type=Ile; Anti-codon=AAT; structure=">>>>.>>..>>>>.........<<<<.>>>>>.......<<<<<.....>>>>>.......<<<<<<<.<<<<.";
LG24	tRNAscan-SE	tRNA	5261023	5261096	77.36	-	.	ID=tRNA_0011; Type=Ile; Anti-codon=AAT; structure=">>>>.>>..>>>>.........<<<<.>>>>>.......<<<<<.....>>>>>.......<<<<<<<.<<<<.";
LG24	tRNAscan-SE	tRNA	5261401	5261473	63.6	-	.	ID=tRNA_0010; Type=Arg; Anti-codon=TCG; structure=">>>>>>>..>>>>........<<<<.>>>>>.......<<<<<.....>>>>>.......<<<<<<<<<<<<.";
LG24	tRNAscan-SE	tRNA	5261905	5261978	71.26	-	.	ID=tRNA_0009; Type=Ile; Anti-codon=AAT; structure=">>>>.>>..>>>>.........<<<<.>>>>>.......<<<<<.....>>>>>.......<<<<<<<.<<<<.";
LG24	tRNAscan-SE	tRNA	5262595	5262668	72.94	-	.	ID=tRNA_0008; Type=Ile; Anti-codon=AAT; structure=">>>>.>>..>>>>.........<<<<.>>>>>.......<<<<<.....>>>>>.......<<<<<<<.<<<<.";
LG24	tRNAscan-SE	tRNA	5263286	5263359	72.94	-	.	ID=tRNA_0007; Type=Ile; Anti-codon=AAT; structure=">>>>.>>..>>>>.........<<<<.>>>>>.......<<<<<.....>>>>>.......<<<<<<<.<<<<.";
LG24	tRNAscan-SE	tRNA	5263977	5264050	77.36	-	.	ID=tRNA_0006; Type=Ile; Anti-codon=AAT; structure=">>>>.>>..>>>>.........<<<<.>>>>>.......<<<<<.....>>>>>.......<<<<<<<.<<<<.";
LG24	tRNAscan-SE	tRNA	5264665	5264738	77.36	-	.	ID=tRNA_0005; Type=Ile; Anti-codon=AAT; structure=">>>>.>>..>>>>.........<<<<.>>>>>.......<<<<<.....>>>>>.......<<<<<<<.<<<<.";
LG24	tRNAscan-SE	tRNA	5265173	5265246	76.14	-	.	ID=tRNA_0004; Type=Ile; Anti-codon=AAT; structure=">>>>.>>..>>>>.........<<<<.>>>>>.......<<<<<.....>>>>>.......<<<<<<<.<<<<.";
LG24	tRNAscan-SE	tRNA	5266374	5266447	77.36	-	.	ID=tRNA_0003; Type=Ile; Anti-codon=AAT; structure=">>>>.>>..>>>>.........<<<<.>>>>>.......<<<<<.....>>>>>.......<<<<<<<.<<<<.";
LG24	tRNAscan-SE	tRNA	5267164	5267237	77.36	-	.	ID=tRNA_0111; Type=Ile; Anti-codon=AAT; structure=">>>>.>>..>>>>.........<<<<.>>>>>.......<<<<<.....>>>>>.......<<<<<<<.<<<<.";
LG24	tRNAscan-SE	tRNA	5267855	5267928	77.36	-	.	ID=tRNA_0110; Type=Ile; Anti-codon=AAT; structure=">>>>.>>..>>>>.........<<<<.>>>>>.......<<<<<.....>>>>>.......<<<<<<<.<<<<.";
LG24	tRNAscan-SE	tRNA	5268792	5268876	48.65	-	.	ID=tRNA_0109; Type=Arg; Anti-codon=TCG; structure=">>>>>>>..>>>>........<<<<.>>>>.....................<<<<.....>>>>>.......<<<<<<<<<<<<.";
LG24	tRNAscan-SE	tRNA	5269307	5269380	77.36	-	.	ID=tRNA_0108; Type=Ile; Anti-codon=AAT; structure=">>>>.>>..>>>>.........<<<<.>>>>>.......<<<<<.....>>>>>.......<<<<<<<.<<<<.";
LG24	tRNAscan-SE	tRNA	5270097	5270170	77.36	-	.	ID=tRNA_0107; Type=Ile; Anti-codon=AAT; structure=">>>>.>>..>>>>.........<<<<.>>>>>.......<<<<<.....>>>>>.......<<<<<<<.<<<<.";
LG24	tRNAscan-SE	tRNA	5270652	5270737	47.48	-	.	ID=tRNA_0106; Type=Arg; Anti-codon=TCG; structure=">>>>>>>..>>>>........<<<<.>>>>>.......<<<<<..>...>...<...<...>>>>>.......<<<<<<<<<<<<.";
LG24	tRNAscan-SE	tRNA	5271168	5271241	77.36	-	.	ID=tRNA_0105; Type=Ile; Anti-codon=AAT; structure=">>>>.>>..>>>>.........<<<<.>>>>>.......<<<<<.....>>>>>.......<<<<<<<.<<<<.";
LG24	tRNAscan-SE	tRNA	5271958	5272031	77.36	-	.	ID=tRNA_0104; Type=Ile; Anti-codon=AAT; structure=">>>>.>>..>>>>.........<<<<.>>>>>.......<<<<<.....>>>>>.......<<<<<<<.<<<<.";
LG24	tRNAscan-SE	tRNA	5272647	5272720	77.36	-	.	ID=tRNA_0103; Type=Ile; Anti-codon=AAT; structure=">>>>.>>..>>>>.........<<<<.>>>>>.......<<<<<.....>>>>>.......<<<<<<<.<<<<.";
LG24	tRNAscan-SE	tRNA	5273202	5273286	48.65	-	.	ID=tRNA_0102; Type=Arg; Anti-codon=TCG; structure=">>>>>>>..>>>>........<<<<.>>>>.....................<<<<.....>>>>>.......<<<<<<<<<<<<.";
LG24	tRNAscan-SE	tRNA	5273718	5273791	77.36	-	.	ID=tRNA_0100; Type=Ile; Anti-codon=AAT; structure=">>>>.>>..>>>>.........<<<<.>>>>>.......<<<<<.....>>>>>.......<<<<<<<.<<<<.";
LG24	tRNAscan-SE	tRNA	5274407	5274480	77.36	-	.	ID=tRNA_0099; Type=Ile; Anti-codon=AAT; structure=">>>>.>>..>>>>.........<<<<.>>>>>.......<<<<<.....>>>>>.......<<<<<<<.<<<<.";
LG24	tRNAscan-SE	tRNA	5275277	5275350	77.36	-	.	ID=tRNA_0098; Type=Ile; Anti-codon=AAT; structure=">>>>.>>..>>>>.........<<<<.>>>>>.......<<<<<.....>>>>>.......<<<<<<<.<<<<.";
LG24	tRNAscan-SE	tRNA	5275981	5276054	77.36	-	.	ID=tRNA_0097; Type=Ile; Anti-codon=AAT; structure=">>>>.>>..>>>>.........<<<<.>>>>>.......<<<<<.....>>>>>.......<<<<<<<.<<<<.";
LG24	tRNAscan-SE	tRNA	7309515	7309586	75	-	.	ID=tRNA_0096; Type=Glu; Anti-codon=TTC; structure=">>>>>>>..>>>>........<<<<.>>>>>.......<<<<<....>>>>>.......<<<<<<<<<<<<.";
LG24	tRNAscan-SE	tRNA	7373029	7373101	74.91	-	.	ID=tRNA_0095; Type=Met; Anti-codon=CAT; structure=">>>>>>>..>>>>........<<<<.>>>>.........<<<<.....>>>>>.......<<<<<<<<<<<<.";
LG24	tRNAscan-SE	tRNA	7373753	7373823	81.62	+	.	ID=tRNA_0066; Type=Gly; Anti-codon=GCC; structure=">>>>>>>..>>>>.......<<<<.>>>>>.......<<<<<....>>>>>.......<<<<<<<<<<<<.";
LG24	tRNAscan-SE	tRNA	7375542	7375614	74.91	-	.	ID=tRNA_0094; Type=Met; Anti-codon=CAT; structure=">>>>>>>..>>>>........<<<<.>>>>.........<<<<.....>>>>>.......<<<<<<<<<<<<.";
LG24	tRNAscan-SE	tRNA	7375867	7375937	81.62	-	.	ID=tRNA_0093; Type=Gly; Anti-codon=GCC; structure=">>>>>>>..>>>>.......<<<<.>>>>>.......<<<<<....>>>>>.......<<<<<<<<<<<<.";
LG24	tRNAscan-SE	tRNA	7377246	7377320	65	-	.	ID=tRNA_0092; Type=Met; Anti-codon=CAT; structure=">>>>>>>..>>>>..........<<<<.>>>>.........<<<<.....>>>>>.......<<<<<<<<<<<<.";
LG24	tRNAscan-SE	tRNA	7378706	7378778	74.91	-	.	ID=tRNA_0091; Type=Met; Anti-codon=CAT; structure=">>>>>>>..>>>>........<<<<.>>>>.........<<<<.....>>>>>.......<<<<<<<<<<<<.";
LG24	tRNAscan-SE	tRNA	7379032	7379102	81.62	-	.	ID=tRNA_0089; Type=Gly; Anti-codon=GCC; structure=">>>>>>>..>>>>.......<<<<.>>>>>.......<<<<<....>>>>>.......<<<<<<<<<<<<.";
LG24	tRNAscan-SE	tRNA	7380409	7380480	63.53	-	.	ID=tRNA_0088; Type=Met; Anti-codon=CAT; structure=">>>.>>>..>>>>........<<<<.>>>>.........<<<<.....>>>>>.......<<<<<<<<<<<.";
LG24	tRNAscan-SE	tRNA	7381864	7381936	74.91	-	.	ID=tRNA_0087; Type=Met; Anti-codon=CAT; structure=">>>>>>>..>>>>........<<<<.>>>>.........<<<<.....>>>>>.......<<<<<<<<<<<<.";
LG24	tRNAscan-SE	tRNA	7382756	7382826	81.62	+	.	ID=tRNA_0067; Type=Gly; Anti-codon=GCC; structure=">>>>>>>..>>>>.......<<<<.>>>>>.......<<<<<....>>>>>.......<<<<<<<<<<<<.";
LG24	tRNAscan-SE	tRNA	7383076	7383148	74.91	+	.	ID=tRNA_0069; Type=Met; Anti-codon=CAT; structure=">>>>>>>..>>>>........<<<<.>>>>.........<<<<.....>>>>>.......<<<<<<<<<<<<.";
LG24	tRNAscan-SE	tRNA	7385261	7385334	68.26	-	.	ID=tRNA_0086; Type=Met; Anti-codon=CAT; structure=">>>>>>>..>>>>........<<<<.>>>>..........<<<<.....>>>>>.......<<<<<<<<<<<<.";
LG24	tRNAscan-SE	tRNA	7386719	7386791	74.91	-	.	ID=tRNA_0085; Type=Met; Anti-codon=CAT; structure=">>>>>>>..>>>>........<<<<.>>>>.........<<<<.....>>>>>.......<<<<<<<<<<<<.";
LG24	tRNAscan-SE	tRNA	7388178	7388249	63.53	-	.	ID=tRNA_0084; Type=Met; Anti-codon=CAT; structure=">>>.>>>..>>>>........<<<<.>>>>.........<<<<.....>>>>>.......<<<<<<<<<<<.";
LG24	tRNAscan-SE	tRNA	7388501	7388571	81.62	-	.	ID=tRNA_0083; Type=Gly; Anti-codon=GCC; structure=">>>>>>>..>>>>.......<<<<.>>>>>.......<<<<<....>>>>>.......<<<<<<<<<<<<.";
LG24	tRNAscan-SE	tRNA	7389871	7389943	74.91	-	.	ID=tRNA_0082; Type=Met; Anti-codon=CAT; structure=">>>>>>>..>>>>........<<<<.>>>>.........<<<<.....>>>>>.......<<<<<<<<<<<<.";
LG24	tRNAscan-SE	tRNA	7391321	7391394	64.66	-	.	ID=tRNA_0081; Type=Met; Anti-codon=CAT; structure=">>>>>>>..>>>>........<<<<.>>>>.........<<<<.....>>>>>.......<<<<<<<<<<<.<.";
LG24	tRNAscan-SE	tRNA	7393107	7393175	63.22	-	.	ID=tRNA_0080; Type=Gly; Anti-codon=GCC; structure=">>>>>>>..>>>>.......<<<<.>>>>>.......<<<<<....>.>>.......<<.<<<<<<<<.";
LG24	tRNAscan-SE	tRNA	7395839	7395910	63.53	-	.	ID=tRNA_0078; Type=Met; Anti-codon=CAT; structure=">>>.>>>..>>>>........<<<<.>>>>.........<<<<.....>>>>>.......<<<<<<<<<<<.";
LG24	tRNAscan-SE	tRNA	7396162	7396232	81.62	-	.	ID=tRNA_0077; Type=Gly; Anti-codon=GCC; structure=">>>>>>>..>>>>.......<<<<.>>>>>.......<<<<<....>>>>>.......<<<<<<<<<<<<.";
LG24	tRNAscan-SE	tRNA	7397538	7397611	64.66	-	.	ID=tRNA_0076; Type=Met; Anti-codon=CAT; structure=">>>>>>>..>>>>........<<<<.>>>>.........<<<<.....>>>>>.......<<<<<<<<<<<.<.";
LG24	tRNAscan-SE	tRNA	7398996	7399068	68.63	-	.	ID=tRNA_0075; Type=Met; Anti-codon=CAT; structure=">>>>>>>..>>>>........<<<<..>>>.........<<<......>>>>>.......<<<<<<<<<<<<.";
LG24	tRNAscan-SE	tRNA	7401667	7401740	46.85	-	.	ID=tRNA_0074; Type=Met; Anti-codon=CAT; structure=">>>>.>....>>>>........<<<<.>>>>.........<<<<......>>>>>.......<<<<<<.<<<<.";
LG24	tRNAscan-SE	tRNA	7403126	7403200	62.34	-	.	ID=tRNA_0073; Type=Met; Anti-codon=CAT; structure=">>>>>>>..>>>>........<<..<<.>>>>.........<<<<.....>>>>>.......<<<<<<<<<<<<.";
LG24	tRNAscan-SE	tRNA	7404914	7404983	43.79	-	.	ID=tRNA_0072; Type=Pseudo; Anti-codon=GCC; structure=">>>>>>>..>>>>.......<<<<.>>.>.........<.<<.....>>..>.......<<<<<<<<<<.";
LG24	tRNAscan-SE	tRNA	7406005	7406076	63.53	-	.	ID=tRNA_0071; Type=Met; Anti-codon=CAT; structure=">>>.>>>..>>>>........<<<<.>>>>.........<<<<.....>>>>>.......<<<<<<<<<<<.";
LG24	tRNAscan-SE	tRNA	7434818	7434891	80.66	+	.	ID=tRNA_0070; Type=Ile; Anti-codon=AAT; structure=">>>>.>>..>>>>.........<<<<.>>>>>.......<<<<<.....>>>>>.......<<<<<<<.<<<<.";
LG24	tRNAscan-SE	tRNA	8964642	8964723	84.6	-	.	ID=tRNA_0001; Type=Ser; Anti-codon=CGA; structure=">>>>>>>..>>>..........<<<.>>>>>.......<<<<<.>>>>...<<<<..>>>>>.......<<<<<<<<<<<<.";
LG24	tRNAscan-SE	tRNA	15147696	15147767	72.92	-	.	ID=tRNA_0101; Type=Asp; Anti-codon=GTC; structure=">>>>>>>..>>>>........<<<<.>>>>>.......<<<<<....>>>>>.......<<<<<<<<<<<<.";
LG24	tRNAscan-SE	tRNA	15185078	15185148	81.62	-	.	ID=tRNA_0100; Type=Gly; Anti-codon=GCC; structure=">>>>>>>..>>>>.......<<<<.>>>>>.......<<<<<....>>>>>.......<<<<<<<<<<<<.";
LG24	tRNAscan-SE	tRNA	15196537	15196607	81.62	+	.	ID=tRNA_0102; Type=Gly; Anti-codon=GCC; structure=">>>>>>>..>>>>.......<<<<.>>>>>.......<<<<<....>>>>>.......<<<<<<<<<<<<.";
LG24	tRNAscan-SE	tRNA	16294007	16294083	22.19	+	.	ID=tRNA_0103; Type=Pseudo; Anti-codon=TCC; structure=".>...>>..>>>>.......<<<<......>>>...........<<<.....>.>>>.......<<<.<<<...<..";
LG24	tRNAscan-SE	tRNA	17120546	17120613	22.44	+	.	ID=tRNA_0104; Type=Pseudo; Anti-codon=ACC; structure=">.>>>>>..>>>>.......<<<<...>>>.........<<<.........>.......<<<<<<.<.";
LG24	tRNAscan-SE	tRNA	17121805	17121877	25.77	+	.	ID=tRNA_0105; Type=Pseudo; Anti-codon=ACC; structure=">.>>..>..>>>>.......<<<<...>>>.........<<<......>.>.>.......<.<.<<..<<.<.";
LG24	tRNAscan-SE	tRNA	17358273	17358345	54.01	+	.	ID=tRNA_0106; Type=Pseudo; Anti-codon=GAC; structure=">.>>.>>..>>>..........<<<.>>>>>.......<<<<<.....>.>>>.......<<<.<<<.<<.<.";
LG24	tRNAscan-SE	tRNA	18859444	18859516	22.52	-	.	ID=tRNA_0099; Type=Pseudo; Anti-codon=ACC; structure=">>>>>..>>>>.......<<<<...>>>.........<<<......>.>.>.......<.<.<....<<<<<.";
Contig00106	cm	rRNA	4169	251	2825.3	-	.	target=LSU_rRNA_eukarya;class=Gene/rRNA;Rfam_id=RF02543;E=0
Contig00106	cm	rRNA	4702	4607	69.5	-	.	target=5_8S_rRNA;class=Gene/rRNA;Rfam_id=RF00002;E=3.5e-19
Contig00106	cm	rRNA	7346	5513	1698.8	-	.	target=SSU_rRNA_eukarya;class=Gene/rRNA;Rfam_id=RF01960;E=0
Contig00106	cm	rRNA	17033	16166	717.6	-	.	target=LSU_rRNA_eukarya;class=Gene/rRNA;Rfam_id=RF02543;E=1.1e-184
Contig00109	cm	rRNA	2	262	52.3	+	.	target=LSU_rRNA_eukarya;class=Gene/rRNA;Rfam_id=RF02543;E=3.6e-13
Contig00109	cm	rRNA	6592	8399	1422.2	+	.	target=SSU_rRNA_eukarya;class=Gene/rRNA;Rfam_id=RF01960;E=0
Contig00109	cm	rRNA	9136	9285	118.8	+	.	target=5_8S_rRNA;class=Gene/rRNA;Rfam_id=RF00002;E=3.9e-33
Contig00109	cm	rRNA	9702	13554	2335.7	+	.	target=LSU_rRNA_eukarya;class=Gene/rRNA;Rfam_id=RF02543;E=0
Contig00112	cm	rRNA	5549	1724	2347.3	-	.	target=LSU_rRNA_eukarya;class=Gene/rRNA;Rfam_id=RF02543;E=0
Contig00112	cm	rRNA	6087	5969	81.1	-	.	target=5_8S_rRNA;class=Gene/rRNA;Rfam_id=RF00002;E=2e-22
Contig00112	cm	rRNA	8633	6830	1381.1	-	.	target=SSU_rRNA_eukarya;class=Gene/rRNA;Rfam_id=RF01960;E=0
Contig00120	cm	rRNA	2	92	42	+	.	target=5S_rRNA;class=Gene/rRNA;Rfam_id=RF00001;E=6.3e-11
Contig00120	cm	rRNA	249	370	79.5	+	.	target=5S_rRNA;class=Gene/rRNA;Rfam_id=RF00001;E=3.9e-20
Contig00120	cm	rRNA	533	649	86.7	+	.	target=5S_rRNA;class=Gene/rRNA;Rfam_id=RF00001;E=5.2e-22
Contig00120	cm	rRNA	811	929	94.2	+	.	target=5S_rRNA;class=Gene/rRNA;Rfam_id=RF00001;E=6.3e-24
Contig00120	cm	rRNA	1086	1204	94.7	+	.	target=5S_rRNA;class=Gene/rRNA;Rfam_id=RF00001;E=6.1e-24
Contig00120	cm	rRNA	1518	1634	86	+	.	target=5S_rRNA;class=Gene/rRNA;Rfam_id=RF00001;E=8e-22
Contig00120	cm	rRNA	1794	1911	96.2	+	.	target=5S_rRNA;class=Gene/rRNA;Rfam_id=RF00001;E=2.5e-24
Contig00120	cm	rRNA	2073	2190	94	+	.	target=5S_rRNA;class=Gene/rRNA;Rfam_id=RF00001;E=6.9e-24
Contig00120	cm	rRNA	2348	2464	86	+	.	target=5S_rRNA;class=Gene/rRNA;Rfam_id=RF00001;E=8e-22
Contig00120	cm	rRNA	2624	2742	106.7	+	.	target=5S_rRNA;class=Gene/rRNA;Rfam_id=RF00001;E=3.7e-27
Contig00120	cm	rRNA	2902	3020	89.2	+	.	target=5S_rRNA;class=Gene/rRNA;Rfam_id=RF00001;E=1.2e-22
Contig00120	cm	rRNA	3180	3296	98.5	+	.	target=5S_rRNA;class=Gene/rRNA;Rfam_id=RF00001;E=4.8e-25
Contig00120	cm	rRNA	3457	3574	96.2	+	.	target=5S_rRNA;class=Gene/rRNA;Rfam_id=RF00001;E=1.9e-24
Contig00120	cm	rRNA	3734	3851	96.2	+	.	target=5S_rRNA;class=Gene/rRNA;Rfam_id=RF00001;E=1.9e-24
Contig00120	cm	rRNA	4012	4130	106.7	+	.	target=5S_rRNA;class=Gene/rRNA;Rfam_id=RF00001;E=3.7e-27
Contig00120	cm	rRNA	4292	4409	96.2	+	.	target=5S_rRNA;class=Gene/rRNA;Rfam_id=RF00001;E=2.5e-24
Contig00120	cm	rRNA	4568	4685	96.2	+	.	target=5S_rRNA;class=Gene/rRNA;Rfam_id=RF00001;E=1.9e-24
Contig00120	cm	rRNA	4847	4964	96.2	+	.	target=5S_rRNA;class=Gene/rRNA;Rfam_id=RF00001;E=1.9e-24
Contig00120	cm	rRNA	5125	5241	82.8	+	.	target=5S_rRNA;class=Gene/rRNA;Rfam_id=RF00001;E=5.5e-21
Contig00120	cm	rRNA	5398	5517	88.3	+	.	target=5S_rRNA;class=Gene/rRNA;Rfam_id=RF00001;E=2.8e-22
Contig00120	cm	rRNA	5677	5794	96.2	+	.	target=5S_rRNA;class=Gene/rRNA;Rfam_id=RF00001;E=1.9e-24
Contig00120	cm	rRNA	5961	6078	96.2	+	.	target=5S_rRNA;class=Gene/rRNA;Rfam_id=RF00001;E=1.9e-24
Contig00120	cm	rRNA	6242	6359	96.2	+	.	target=5S_rRNA;class=Gene/rRNA;Rfam_id=RF00001;E=1.9e-24
Contig00120	cm	rRNA	6521	6637	86	+	.	target=5S_rRNA;class=Gene/rRNA;Rfam_id=RF00001;E=8e-22
Contig00120	cm	rRNA	6792	6909	93	+	.	target=5S_rRNA;class=Gene/rRNA;Rfam_id=RF00001;E=1.7e-23
Contig00120	cm	rRNA	7067	7185	92.3	+	.	target=5S_rRNA;class=Gene/rRNA;Rfam_id=RF00001;E=1.9e-23
Contig00120	cm	rRNA	7341	7457	80.6	+	.	target=5S_rRNA;class=Gene/rRNA;Rfam_id=RF00001;E=2e-20
Contig00120	cm	rRNA	7616	7733	96.2	+	.	target=5S_rRNA;class=Gene/rRNA;Rfam_id=RF00001;E=1.9e-24
Contig00121	cm	rRNA	7205	8265	774.1	+	.	target=SSU_rRNA_eukarya;class=Gene/rRNA;Rfam_id=RF01960;E=1.2e-235
Contig00127	cm	rRNA	7990	4095	2635.2	-	.	target=LSU_rRNA_eukarya;class=Gene/rRNA;Rfam_id=RF02543;E=0
Contig00127	cm	rRNA	8502	8418	50.5	-	.	target=5_8S_rRNA;class=Gene/rRNA;Rfam_id=RF00002;E=1e-13
Contig00127	cm	rRNA	11137	9309	1629.9	-	.	target=SSU_rRNA_eukarya;class=Gene/rRNA;Rfam_id=RF01960;E=0
Contig00128	cm	rRNA	2671	4473	1397	+	.	target=SSU_rRNA_eukarya;class=Gene/rRNA;Rfam_id=RF01960;E=0
Contig00128	cm	rRNA	5211	5358	99.1	+	.	target=5_8S_rRNA;class=Gene/rRNA;Rfam_id=RF00002;E=1.6e-27
Contig00128	cm	rRNA	5774	9631	2301	+	.	target=LSU_rRNA_eukarya;class=Gene/rRNA;Rfam_id=RF02543;E=0
LG02	cm	rRNA	76102	76802	71.8	+	.	target=SSU_rRNA_eukarya;class=Gene/rRNA;Rfam_id=RF01960;E=5.1e-22
LG02	cm	rRNA	28166753	28167988	222.5	-	.	target=LSU_rRNA_eukarya;class=Gene/rRNA;Rfam_id=RF02543;E=7.8e-57
LG02	cm	rRNA	30465888	30469091	1486.1	-	.	target=LSU_rRNA_eukarya;class=Gene/rRNA;Rfam_id=RF02543;E=0
LG02	cm	rRNA	30469528	30469681	143.5	-	.	target=5_8S_rRNA;class=Gene/rRNA;Rfam_id=RF00002;E=2.5e-40
LG02	cm	rRNA	30470441	30472280	1658.9	-	.	target=SSU_rRNA_eukarya;class=Gene/rRNA;Rfam_id=RF01960;E=0
LG02	cm	rRNA	30478587	30482476	2610.8	-	.	target=LSU_rRNA_eukarya;class=Gene/rRNA;Rfam_id=RF02543;E=0
LG02	cm	rRNA	30482907	30483060	143.5	-	.	target=5_8S_rRNA;class=Gene/rRNA;Rfam_id=RF00002;E=3.6e-40
LG02	cm	rRNA	30483808	30485650	1675.1	-	.	target=SSU_rRNA_eukarya;class=Gene/rRNA;Rfam_id=RF01960;E=0
LG02	cm	rRNA	30492387	30494093	1357.6	-	.	target=LSU_rRNA_eukarya;class=Gene/rRNA;Rfam_id=RF02543;E=0
LG03	cm	rRNA	24795007	24796449	233.5	+	.	target=LSU_rRNA_eukarya;class=Gene/rRNA;Rfam_id=RF02543;E=1.2e-59
LG03	cm	rRNA	28098237	28098353	106	-	.	target=LSU_rRNA_eukarya;class=Gene/rRNA;Rfam_id=RF02543;E=8.3e-27
LG04	cm	rRNA	949327	949728	191.2	-	.	target=LSU_rRNA_eukarya;class=Gene/rRNA;Rfam_id=RF02543;E=1e-48
LG04	cm	rRNA	5949901	5950096	145.6	-	.	target=LSU_rRNA_eukarya;class=Gene/rRNA;Rfam_id=RF02543;E=5e-37
LG05	cm	rRNA	4871776	4872476	94.1	-	.	target=SSU_rRNA_eukarya;class=Gene/rRNA;Rfam_id=RF01960;E=7.9e-29
LG05	cm	rRNA	23312137	23312476	50.5	-	.	target=SSU_rRNA_eukarya;class=Gene/rRNA;Rfam_id=RF01960;E=1.5e-15
LG05	cm	rRNA	30416533	30418536	105.5	-	.	target=LSU_rRNA_eukarya;class=Gene/rRNA;Rfam_id=RF02543;E=1.2e-26
LG06	cm	rRNA	26866960	26867375	83.2	-	.	target=SSU_rRNA_eukarya;class=Gene/rRNA;Rfam_id=RF01960;E=1.9e-25
LG06	cm	rRNA	32707485	32707582	66.3	+	.	target=LSU_rRNA_eukarya;class=Gene/rRNA;Rfam_id=RF02543;E=1.6e-16
LG07	cm	rRNA	23043443	23043588	127.8	-	.	target=LSU_rRNA_eukarya;class=Gene/rRNA;Rfam_id=RF02543;E=2.1e-32
LG08	cm	rRNA	25829034	25829150	56.9	+	.	target=5S_rRNA;class=Gene/rRNA;Rfam_id=RF00001;E=2.7e-14
LG09	cm	rRNA	2698347	2698488	63.5	+	.	target=LSU_rRNA_eukarya;class=Gene/rRNA;Rfam_id=RF02543;E=7.9e-16
LG10	cm	rRNA	1212310	1212702	61.9	+	.	target=SSU_rRNA_eukarya;class=Gene/rRNA;Rfam_id=RF01960;E=5.1e-19
LG10	cm	rRNA	27514764	27514870	87.8	-	.	target=LSU_rRNA_eukarya;class=Gene/rRNA;Rfam_id=RF02543;E=4.5e-22
LG11	cm	rRNA	2735063	2735190	84.2	-	.	target=LSU_rRNA_eukarya;class=Gene/rRNA;Rfam_id=RF02543;E=3.8e-21
LG11	cm	rRNA	3678621	3679084	100.4	-	.	target=LSU_rRNA_eukarya;class=Gene/rRNA;Rfam_id=RF02543;E=2.4e-25
LG11	cm	rRNA	12977700	12978036	68	+	.	target=SSU_rRNA_eukarya;class=Gene/rRNA;Rfam_id=RF01960;E=9.5e-21
LG12	cm	rRNA	22066791	22066899	67.9	-	.	target=5S_rRNA;class=Gene/rRNA;Rfam_id=RF00001;E=3.9e-17
LG12	cm	rRNA	22092106	22092216	76.3	-	.	target=5S_rRNA;class=Gene/rRNA;Rfam_id=RF00001;E=2.6e-19
LG12	cm	rRNA	22094817	22094935	121.7	+	.	target=5S_rRNA;class=Gene/rRNA;Rfam_id=RF00001;E=4.8e-31
LG12	cm	rRNA	22169291	22169409	124.5	-	.	target=5S_rRNA;class=Gene/rRNA;Rfam_id=RF00001;E=9.4e-32
LG12	cm	rRNA	22169986	22170104	124.8	-	.	target=5S_rRNA;class=Gene/rRNA;Rfam_id=RF00001;E=1e-31
LG12	cm	rRNA	22170672	22170790	122.1	-	.	target=5S_rRNA;class=Gene/rRNA;Rfam_id=RF00001;E=5.2e-31
LG12	cm	rRNA	22171370	22171488	124.5	-	.	target=5S_rRNA;class=Gene/rRNA;Rfam_id=RF00001;E=9.4e-32
LG12	cm	rRNA	22172064	22172182	124.5	-	.	target=5S_rRNA;class=Gene/rRNA;Rfam_id=RF00001;E=9.4e-32
LG12	cm	rRNA	22172758	22172876	124.8	-	.	target=5S_rRNA;class=Gene/rRNA;Rfam_id=RF00001;E=7.8e-32
LG12	cm	rRNA	22173445	22173563	116.3	-	.	target=5S_rRNA;class=Gene/rRNA;Rfam_id=RF00001;E=1.2e-29
LG12	cm	rRNA	22174140	22174251	92	-	.	target=5S_rRNA;class=Gene/rRNA;Rfam_id=RF00001;E=2.3e-23
LG12	cm	rRNA	22174828	22174946	124.8	-	.	target=5S_rRNA;class=Gene/rRNA;Rfam_id=RF00001;E=7.8e-32
LG12	cm	rRNA	22175524	22175642	124.5	-	.	target=5S_rRNA;class=Gene/rRNA;Rfam_id=RF00001;E=9.4e-32
LG12	cm	rRNA	22176219	22176337	124.5	-	.	target=5S_rRNA;class=Gene/rRNA;Rfam_id=RF00001;E=9.4e-32
LG12	cm	rRNA	22176919	22177037	124.8	-	.	target=5S_rRNA;class=Gene/rRNA;Rfam_id=RF00001;E=7.8e-32
LG12	cm	rRNA	22177609	22177727	122.1	-	.	target=5S_rRNA;class=Gene/rRNA;Rfam_id=RF00001;E=3.9e-31
LG12	cm	rRNA	22178305	22178423	119.2	-	.	target=5S_rRNA;class=Gene/rRNA;Rfam_id=RF00001;E=2.1e-30
LG12	cm	rRNA	22179001	22179119	124.8	-	.	target=5S_rRNA;class=Gene/rRNA;Rfam_id=RF00001;E=7.6e-32
LG12	cm	rRNA	22179698	22179816	124.5	-	.	target=5S_rRNA;class=Gene/rRNA;Rfam_id=RF00001;E=9.4e-32
LG12	cm	rRNA	22180398	22180516	124.5	-	.	target=5S_rRNA;class=Gene/rRNA;Rfam_id=RF00001;E=9.4e-32
LG12	cm	rRNA	22181091	22181209	124.5	-	.	target=5S_rRNA;class=Gene/rRNA;Rfam_id=RF00001;E=9.4e-32
LG12	cm	rRNA	22181787	22181905	124.5	-	.	target=5S_rRNA;class=Gene/rRNA;Rfam_id=RF00001;E=1.2e-31
LG12	cm	rRNA	22182483	22182601	110	-	.	target=5S_rRNA;class=Gene/rRNA;Rfam_id=RF00001;E=6.8e-28
LG12	cm	rRNA	22183173	22183290	107.1	-	.	target=5S_rRNA;class=Gene/rRNA;Rfam_id=RF00001;E=3.8e-27
LG12	cm	rRNA	22183868	22183986	124.5	-	.	target=5S_rRNA;class=Gene/rRNA;Rfam_id=RF00001;E=9.4e-32
LG12	cm	rRNA	22184564	22184682	124.5	-	.	target=5S_rRNA;class=Gene/rRNA;Rfam_id=RF00001;E=9.4e-32
LG13	cm	rRNA	7881360	7882607	217.7	+	.	target=LSU_rRNA_eukarya;class=Gene/rRNA;Rfam_id=RF02543;E=1.4e-55
LG14	cm	rRNA	8018504	8018823	66.4	-	.	target=SSU_rRNA_eukarya;class=Gene/rRNA;Rfam_id=RF01960;E=2.3e-20
LG14	cm	rRNA	22134314	22134508	64	+	.	target=LSU_rRNA_eukarya;class=Gene/rRNA;Rfam_id=RF02543;E=6.1e-16
LG15	cm	rRNA	26150419	26154262	2521.8	-	.	target=LSU_rRNA_eukarya;class=Gene/rRNA;Rfam_id=RF02543;E=0
LG15	cm	rRNA	26154678	26154827	100.7	-	.	target=5_8S_rRNA;class=Gene/rRNA;Rfam_id=RF00002;E=5.4e-28
LG15	cm	rRNA	26155547	26157362	1558.5	-	.	target=SSU_rRNA_eukarya;class=Gene/rRNA;Rfam_id=RF01960;E=0
LG16	cm	rRNA	2928156	2928249	68.1	+	.	target=5S_rRNA;class=Gene/rRNA;Rfam_id=RF00001;E=3.3e-17
LG17	cm	rRNA	24916731	24917238	88.5	+	.	target=SSU_rRNA_eukarya;class=Gene/rRNA;Rfam_id=RF01960;E=4.8e-27
LG18	cm	rRNA	7789848	7789956	127.2	+	.	target=LSU_rRNA_eukarya;class=Gene/rRNA;Rfam_id=RF02543;E=3e-32
LG18	cm	rRNA	25438904	25439405	348.1	+	.	target=LSU_rRNA_eukarya;class=Gene/rRNA;Rfam_id=RF02543;E=3.4e-89
LG19	cm	rRNA	10026194	10026305	47.2	+	.	target=5S_rRNA;class=Gene/rRNA;Rfam_id=RF00001;E=1.2e-11
LG20	cm	rRNA	23453549	23454503	408.3	-	.	target=SSU_rRNA_eukarya;class=Gene/rRNA;Rfam_id=RF01960;E=2.9e-124
LG20	cm	rRNA	26167381	26167496	51.6	-	.	target=5S_rRNA;class=Gene/rRNA;Rfam_id=RF00001;E=1.5e-12
LG21	cm	rRNA	24376901	24377279	78	-	.	target=SSU_rRNA_eukarya;class=Gene/rRNA;Rfam_id=RF01960;E=6.6e-24
LG22	cm	rRNA	540597	540989	79.5	-	.	target=LSU_rRNA_eukarya;class=Gene/rRNA;Rfam_id=RF02543;E=6.6e-20
LG23	cm	rRNA	13478283	13478541	108.3	-	.	target=LSU_rRNA_eukarya;class=Gene/rRNA;Rfam_id=RF02543;E=2.2e-27
LG24	cm	rRNA	8495264	8495382	107.5	+	.	target=5S_rRNA;class=Gene/rRNA;Rfam_id=RF00001;E=2.2e-27
LG24	cm	rRNA	8495507	8495615	81.9	+	.	target=5S_rRNA;class=Gene/rRNA;Rfam_id=RF00001;E=9.4e-21
LG24	cm	rRNA	8495776	8495894	112.1	+	.	target=5S_rRNA;class=Gene/rRNA;Rfam_id=RF00001;E=1.5e-28
LG24	cm	rRNA	8496057	8496175	107.5	+	.	target=5S_rRNA;class=Gene/rRNA;Rfam_id=RF00001;E=2.2e-27
LG24	cm	rRNA	8496333	8496451	110.8	+	.	target=5S_rRNA;class=Gene/rRNA;Rfam_id=RF00001;E=4.3e-28
LG24	cm	rRNA	8496614	8496732	110.8	+	.	target=5S_rRNA;class=Gene/rRNA;Rfam_id=RF00001;E=3.2e-28
LG24	cm	rRNA	8496890	8497008	110.8	+	.	target=5S_rRNA;class=Gene/rRNA;Rfam_id=RF00001;E=3.2e-28
LG24	cm	rRNA	8497166	8497284	104.8	+	.	target=5S_rRNA;class=Gene/rRNA;Rfam_id=RF00001;E=1.1e-26
LG24	cm	rRNA	8497442	8497560	110.8	+	.	target=5S_rRNA;class=Gene/rRNA;Rfam_id=RF00001;E=4.3e-28
LG24	cm	rRNA	8497722	8497840	110.8	+	.	target=5S_rRNA;class=Gene/rRNA;Rfam_id=RF00001;E=3.2e-28
LG24	cm	rRNA	8498007	8498125	110.8	+	.	target=5S_rRNA;class=Gene/rRNA;Rfam_id=RF00001;E=3.2e-28
LG24	cm	rRNA	8498283	8498401	110.8	+	.	target=5S_rRNA;class=Gene/rRNA;Rfam_id=RF00001;E=3.2e-28
LG24	cm	rRNA	8498564	8498682	110.8	+	.	target=5S_rRNA;class=Gene/rRNA;Rfam_id=RF00001;E=3.2e-28
LG24	cm	rRNA	8498847	8498965	104.9	+	.	target=5S_rRNA;class=Gene/rRNA;Rfam_id=RF00001;E=1.4e-26
LG24	cm	rRNA	8499128	8499246	110.8	+	.	target=5S_rRNA;class=Gene/rRNA;Rfam_id=RF00001;E=3.2e-28
LG24	cm	rRNA	8499404	8499522	110.8	+	.	target=5S_rRNA;class=Gene/rRNA;Rfam_id=RF00001;E=3.2e-28
LG24	cm	rRNA	8499685	8499803	110.8	+	.	target=5S_rRNA;class=Gene/rRNA;Rfam_id=RF00001;E=3.2e-28
LG24	cm	rRNA	8499961	8500079	110.8	+	.	target=5S_rRNA;class=Gene/rRNA;Rfam_id=RF00001;E=3.2e-28
LG24	cm	rRNA	8500241	8500359	110.8	+	.	target=5S_rRNA;class=Gene/rRNA;Rfam_id=RF00001;E=4.3e-28
LG24	cm	rRNA	8500522	8500640	110.8	+	.	target=5S_rRNA;class=Gene/rRNA;Rfam_id=RF00001;E=3.2e-28
LG24	cm	rRNA	8500802	8500920	110.8	+	.	target=5S_rRNA;class=Gene/rRNA;Rfam_id=RF00001;E=3.2e-28
LG24	cm	rRNA	8501082	8501200	107.5	+	.	target=5S_rRNA;class=Gene/rRNA;Rfam_id=RF00001;E=2.2e-27
LG24	cm	rRNA	8501358	8501476	110.8	+	.	target=5S_rRNA;class=Gene/rRNA;Rfam_id=RF00001;E=3.2e-28
LG24	cm	rRNA	8501639	8501757	105.9	+	.	target=5S_rRNA;class=Gene/rRNA;Rfam_id=RF00001;E=8e-27
LG24	cm	rRNA	8501920	8502038	107.5	+	.	target=5S_rRNA;class=Gene/rRNA;Rfam_id=RF00001;E=2.2e-27
LG24	cm	rRNA	8502201	8502319	110.8	+	.	target=5S_rRNA;class=Gene/rRNA;Rfam_id=RF00001;E=3.2e-28
LG24	cm	rRNA	8502480	8502598	110.8	+	.	target=5S_rRNA;class=Gene/rRNA;Rfam_id=RF00001;E=3.2e-28
LG24	cm	rRNA	8502751	8502869	107.5	+	.	target=5S_rRNA;class=Gene/rRNA;Rfam_id=RF00001;E=2.2e-27
LG24	cm	rRNA	8503032	8503150	110.8	+	.	target=5S_rRNA;class=Gene/rRNA;Rfam_id=RF00001;E=4.3e-28
LG24	cm	rRNA	8503313	8503431	107.5	+	.	target=5S_rRNA;class=Gene/rRNA;Rfam_id=RF00001;E=2.2e-27
LG24	cm	rRNA	8503595	8503713	110.8	+	.	target=5S_rRNA;class=Gene/rRNA;Rfam_id=RF00001;E=3.2e-28
LG24	cm	rRNA	8503874	8503992	110.8	+	.	target=5S_rRNA;class=Gene/rRNA;Rfam_id=RF00001;E=3.2e-28
LG24	cm	rRNA	8504150	8504268	110.8	+	.	target=5S_rRNA;class=Gene/rRNA;Rfam_id=RF00001;E=2.7e-28
LG24	cm	rRNA	8505039	8505132	42.2	+	.	target=5S_rRNA;class=Gene/rRNA;Rfam_id=RF00001;E=1.7e-10
LG24	cm	rRNA	8510390	8510515	48.3	+	.	target=5S_rRNA;class=Gene/rRNA;Rfam_id=RF00001;E=4.5e-12
LG24	cm	rRNA	8510671	8510789	102.9	+	.	target=5S_rRNA;class=Gene/rRNA;Rfam_id=RF00001;E=3.6e-26
LG24	cm	rRNA	8510950	8511068	108.1	+	.	target=5S_rRNA;class=Gene/rRNA;Rfam_id=RF00001;E=1.6e-27
LG24	cm	rRNA	8511231	8511349	108.1	+	.	target=5S_rRNA;class=Gene/rRNA;Rfam_id=RF00001;E=1.6e-27
LG24	cm	rRNA	8511512	8511630	110.8	+	.	target=5S_rRNA;class=Gene/rRNA;Rfam_id=RF00001;E=3.2e-28
LG24	cm	rRNA	8511794	8511912	110.8	+	.	target=5S_rRNA;class=Gene/rRNA;Rfam_id=RF00001;E=4.3e-28
LG24	cm	rRNA	8512075	8512188	88.5	+	.	target=5S_rRNA;class=Gene/rRNA;Rfam_id=RF00001;E=1.9e-22
LG24	cm	rRNA	8512762	8512880	107.5	+	.	target=5S_rRNA;class=Gene/rRNA;Rfam_id=RF00001;E=2.2e-27
LG24	cm	rRNA	8513035	8513153	110.8	+	.	target=5S_rRNA;class=Gene/rRNA;Rfam_id=RF00001;E=3.2e-28
LG24	cm	rRNA	8513316	8513434	110.8	+	.	target=5S_rRNA;class=Gene/rRNA;Rfam_id=RF00001;E=3.2e-28
LG24	cm	rRNA	8513592	8513694	52.8	+	.	target=5S_rRNA;class=Gene/rRNA;Rfam_id=RF00001;E=3.1e-13
LG24	cm	rRNA	8514032	8514153	80.7	+	.	target=5S_rRNA;class=Gene/rRNA;Rfam_id=RF00001;E=1.9e-20
LG24	cm	rRNA	8514356	8514464	91.8	+	.	target=5S_rRNA;class=Gene/rRNA;Rfam_id=RF00001;E=2.6e-23
LG24	cm	rRNA	8514625	8514743	107.5	+	.	target=5S_rRNA;class=Gene/rRNA;Rfam_id=RF00001;E=2.2e-27
LG24	cm	rRNA	8514904	8515022	110.8	+	.	target=5S_rRNA;class=Gene/rRNA;Rfam_id=RF00001;E=3.2e-28
LG24	cm	rRNA	8515185	8515303	104.3	+	.	target=5S_rRNA;class=Gene/rRNA;Rfam_id=RF00001;E=2.1e-26
LG24	cm	rRNA	8515466	8515584	110.8	+	.	target=5S_rRNA;class=Gene/rRNA;Rfam_id=RF00001;E=3.2e-28
LG24	cm	rRNA	8515747	8515865	111.4	+	.	target=5S_rRNA;class=Gene/rRNA;Rfam_id=RF00001;E=2.2e-28
LG24	cm	rRNA	8516023	8516141	110.8	+	.	target=5S_rRNA;class=Gene/rRNA;Rfam_id=RF00001;E=3.2e-28
LG24	cm	rRNA	8516304	8516422	110.8	+	.	target=5S_rRNA;class=Gene/rRNA;Rfam_id=RF00001;E=3.2e-28
LG24	cm	rRNA	8516580	8516698	110.8	+	.	target=5S_rRNA;class=Gene/rRNA;Rfam_id=RF00001;E=4.3e-28
LG24	cm	rRNA	8516861	8516979	105.9	+	.	target=5S_rRNA;class=Gene/rRNA;Rfam_id=RF00001;E=6e-27
LG24	cm	rRNA	8517137	8517255	107.5	+	.	target=5S_rRNA;class=Gene/rRNA;Rfam_id=RF00001;E=2.2e-27
LG24	cm	rRNA	8517413	8517531	110.8	+	.	target=5S_rRNA;class=Gene/rRNA;Rfam_id=RF00001;E=3.2e-28
LG24	cm	rRNA	8517694	8517812	110.8	+	.	target=5S_rRNA;class=Gene/rRNA;Rfam_id=RF00001;E=4.3e-28
LG24	cm	rRNA	8517965	8518083	107.5	+	.	target=5S_rRNA;class=Gene/rRNA;Rfam_id=RF00001;E=2.2e-27
LG24	cm	rRNA	8523615	8523704	47.9	+	.	target=5S_rRNA;class=Gene/rRNA;Rfam_id=RF00001;E=7.7e-12
LG24	cm	rRNA	8529494	8529609	50.5	+	.	target=5S_rRNA;class=Gene/rRNA;Rfam_id=RF00001;E=1.6e-12
LG24	cm	rRNA	8536945	8537060	43.6	+	.	target=5S_rRNA;class=Gene/rRNA;Rfam_id=RF00001;E=7.2e-11
LG24	cm	rRNA	8543063	8543170	43.3	+	.	target=5S_rRNA;class=Gene/rRNA;Rfam_id=RF00001;E=8.9e-11
LG24	cm	rRNA	8561639	8561766	71.6	+	.	target=5S_rRNA;class=Gene/rRNA;Rfam_id=RF00001;E=4.3e-18
LG24	cm	rRNA	8563488	8563606	121.7	-	.	target=5S_rRNA;class=Gene/rRNA;Rfam_id=RF00001;E=6.5e-31
LG24	cm	rRNA	8564059	8564177	121.7	+	.	target=5S_rRNA;class=Gene/rRNA;Rfam_id=RF00001;E=4.8e-31
LG24	cm	rRNA	8965661	8965769	87.6	-	.	target=5S_rRNA;class=Gene/rRNA;Rfam_id=RF00001;E=3.2e-22
LG24	cm	rRNA	8965932	8966050	110.8	-	.	target=5S_rRNA;class=Gene/rRNA;Rfam_id=RF00001;E=4.3e-28
LG24	cm	rRNA	8966210	8966328	110.8	-	.	target=5S_rRNA;class=Gene/rRNA;Rfam_id=RF00001;E=3.2e-28
LG24	cm	rRNA	8966494	8966612	102	-	.	target=5S_rRNA;class=Gene/rRNA;Rfam_id=RF00001;E=6.1e-26
LG24	cm	rRNA	8966775	8966893	110.8	-	.	target=5S_rRNA;class=Gene/rRNA;Rfam_id=RF00001;E=3.2e-28
LG24	cm	rRNA	8967057	8967175	110.8	-	.	target=5S_rRNA;class=Gene/rRNA;Rfam_id=RF00001;E=3.2e-28
LG24	cm	rRNA	8967337	8967462	94.9	-	.	target=5S_rRNA;class=Gene/rRNA;Rfam_id=RF00001;E=5.6e-24
LG24	cm	rRNA	8967617	8967735	92.4	-	.	target=5S_rRNA;class=Gene/rRNA;Rfam_id=RF00001;E=1.9e-23
LG24	cm	rRNA	8967903	8968021	110.8	-	.	target=5S_rRNA;class=Gene/rRNA;Rfam_id=RF00001;E=3.2e-28
LG24	cm	rRNA	8968178	8968296	110.8	-	.	target=5S_rRNA;class=Gene/rRNA;Rfam_id=RF00001;E=3.2e-28
LG24	cm	rRNA	8968459	8968577	110.8	-	.	target=5S_rRNA;class=Gene/rRNA;Rfam_id=RF00001;E=3.2e-28
LG24	cm	rRNA	8968738	8968853	96.1	-	.	target=5S_rRNA;class=Gene/rRNA;Rfam_id=RF00001;E=2.7e-24
LG24	cm	rRNA	8969017	8969135	110.8	-	.	target=5S_rRNA;class=Gene/rRNA;Rfam_id=RF00001;E=3.2e-28
LG24	cm	rRNA	8969297	8969415	111.3	-	.	target=5S_rRNA;class=Gene/rRNA;Rfam_id=RF00001;E=2.3e-28
LG24	cm	rRNA	8969578	8969696	107.5	-	.	target=5S_rRNA;class=Gene/rRNA;Rfam_id=RF00001;E=2.2e-27
LG24	cm	rRNA	8969860	8969978	110.8	-	.	target=5S_rRNA;class=Gene/rRNA;Rfam_id=RF00001;E=3.2e-28
LG24	cm	rRNA	8970133	8970251	95.6	-	.	target=5S_rRNA;class=Gene/rRNA;Rfam_id=RF00001;E=3.5e-24
LG24	cm	rRNA	8970413	8970530	97	-	.	target=5S_rRNA;class=Gene/rRNA;Rfam_id=RF00001;E=1.2e-24
LG24	cm	rRNA	8970694	8970812	108.4	-	.	target=5S_rRNA;class=Gene/rRNA;Rfam_id=RF00001;E=1.4e-27
LG24	cm	rRNA	8970975	8971093	110.8	-	.	target=5S_rRNA;class=Gene/rRNA;Rfam_id=RF00001;E=3.2e-28
LG24	cm	rRNA	8971254	8971375	87.9	-	.	target=5S_rRNA;class=Gene/rRNA;Rfam_id=RF00001;E=2.6e-22
LG24	cm	rRNA	8971538	8971656	110.8	-	.	target=5S_rRNA;class=Gene/rRNA;Rfam_id=RF00001;E=4.3e-28
LG24	cm	rRNA	8971817	8971936	104.9	-	.	target=5S_rRNA;class=Gene/rRNA;Rfam_id=RF00001;E=1.1e-26
LG24	cm	rRNA	8972109	8972227	110.8	-	.	target=5S_rRNA;class=Gene/rRNA;Rfam_id=RF00001;E=3.2e-28
LG24	cm	rRNA	8972386	8972504	108.4	-	.	target=5S_rRNA;class=Gene/rRNA;Rfam_id=RF00001;E=1.4e-27
LG24	cm	rRNA	8972664	8972783	97.6	-	.	target=5S_rRNA;class=Gene/rRNA;Rfam_id=RF00001;E=8.4e-25
LG24	cm	rRNA	8972946	8973064	110.8	-	.	target=5S_rRNA;class=Gene/rRNA;Rfam_id=RF00001;E=3.2e-28
LG24	cm	rRNA	8973227	8973346	102.9	-	.	target=5S_rRNA;class=Gene/rRNA;Rfam_id=RF00001;E=4.7e-26
LG24	cm	rRNA	8973509	8973627	110.8	-	.	target=5S_rRNA;class=Gene/rRNA;Rfam_id=RF00001;E=3.2e-28
LG24	cm	rRNA	8973786	8973904	110.8	-	.	target=5S_rRNA;class=Gene/rRNA;Rfam_id=RF00001;E=3.2e-28
LG24	cm	rRNA	8974065	8974183	110.8	-	.	target=5S_rRNA;class=Gene/rRNA;Rfam_id=RF00001;E=3.2e-28
LG24	cm	rRNA	8974344	8974462	110.8	-	.	target=5S_rRNA;class=Gene/rRNA;Rfam_id=RF00001;E=3.2e-28
LG24	cm	rRNA	8974633	8974751	110.8	-	.	target=5S_rRNA;class=Gene/rRNA;Rfam_id=RF00001;E=4.3e-28
LG24	cm	rRNA	8974911	8975029	110.8	-	.	target=5S_rRNA;class=Gene/rRNA;Rfam_id=RF00001;E=3.2e-28
LG24	cm	rRNA	8975194	8975312	104.9	-	.	target=5S_rRNA;class=Gene/rRNA;Rfam_id=RF00001;E=1e-26
LG24	cm	rRNA	8975473	8975593	105.6	-	.	target=5S_rRNA;class=Gene/rRNA;Rfam_id=RF00001;E=7.1e-27
LG24	cm	rRNA	8975755	8975874	101.2	-	.	target=5S_rRNA;class=Gene/rRNA;Rfam_id=RF00001;E=9.5e-26
LG24	cm	rRNA	8976039	8976157	111.1	-	.	target=5S_rRNA;class=Gene/rRNA;Rfam_id=RF00001;E=3.6e-28
LG24	cm	rRNA	8976319	8976437	110.8	-	.	target=5S_rRNA;class=Gene/rRNA;Rfam_id=RF00001;E=3.2e-28
LG24	cm	rRNA	8976599	8976719	103.3	-	.	target=5S_rRNA;class=Gene/rRNA;Rfam_id=RF00001;E=2.8e-26
LG24	cm	rRNA	8976882	8977000	110.8	-	.	target=5S_rRNA;class=Gene/rRNA;Rfam_id=RF00001;E=3.2e-28
LG24	cm	rRNA	8977158	8977276	110.8	-	.	target=5S_rRNA;class=Gene/rRNA;Rfam_id=RF00001;E=3.2e-28
LG24	cm	rRNA	8977443	8977561	110.8	-	.	target=5S_rRNA;class=Gene/rRNA;Rfam_id=RF00001;E=4.3e-28
LG24	cm	rRNA	8977723	8977841	110.8	-	.	target=5S_rRNA;class=Gene/rRNA;Rfam_id=RF00001;E=3.2e-28
LG24	cm	rRNA	8977999	8978127	100.9	-	.	target=5S_rRNA;class=Gene/rRNA;Rfam_id=RF00001;E=1.2e-25
LG24	cm	rRNA	8978291	8978409	110.8	-	.	target=5S_rRNA;class=Gene/rRNA;Rfam_id=RF00001;E=3.2e-28
LG24	cm	rRNA	8978583	8978701	110.8	-	.	target=5S_rRNA;class=Gene/rRNA;Rfam_id=RF00001;E=3.2e-28
LG24	cm	rRNA	8978868	8978990	91.6	-	.	target=5S_rRNA;class=Gene/rRNA;Rfam_id=RF00001;E=2.9e-23
LG24	cm	rRNA	8979156	8979276	105.6	-	.	target=5S_rRNA;class=Gene/rRNA;Rfam_id=RF00001;E=7.1e-27
LG24	cm	rRNA	8979436	8979554	110.8	-	.	target=5S_rRNA;class=Gene/rRNA;Rfam_id=RF00001;E=4.3e-28
LG24	cm	rRNA	8979719	8979837	110.8	-	.	target=5S_rRNA;class=Gene/rRNA;Rfam_id=RF00001;E=3.2e-28
LG24	cm	rRNA	8980000	8980121	102.5	-	.	target=5S_rRNA;class=Gene/rRNA;Rfam_id=RF00001;E=4.6e-26
LG24	cm	rRNA	8980282	8980400	110.8	-	.	target=5S_rRNA;class=Gene/rRNA;Rfam_id=RF00001;E=3.2e-28
LG24	cm	rRNA	8980569	8980687	108.4	-	.	target=5S_rRNA;class=Gene/rRNA;Rfam_id=RF00001;E=1.4e-27
LG24	cm	rRNA	8980846	8980964	108.4	-	.	target=5S_rRNA;class=Gene/rRNA;Rfam_id=RF00001;E=1.4e-27
LG24	cm	rRNA	8981128	8981246	107	-	.	target=5S_rRNA;class=Gene/rRNA;Rfam_id=RF00001;E=4.1e-27
LG24	cm	rRNA	8981407	8981525	104	-	.	target=5S_rRNA;class=Gene/rRNA;Rfam_id=RF00001;E=1.8e-26
LG24	cm	rRNA	8981685	8981802	104.7	-	.	target=5S_rRNA;class=Gene/rRNA;Rfam_id=RF00001;E=1.2e-26
LG24	cm	rRNA	8981967	8982085	110.8	-	.	target=5S_rRNA;class=Gene/rRNA;Rfam_id=RF00001;E=3.2e-28
LG24	cm	rRNA	8982247	8982365	92.5	-	.	target=5S_rRNA;class=Gene/rRNA;Rfam_id=RF00001;E=1.7e-23
LG24	cm	rRNA	8982524	8982642	110.8	-	.	target=5S_rRNA;class=Gene/rRNA;Rfam_id=RF00001;E=3.2e-28
LG24	cm	rRNA	8982803	8982921	110.8	-	.	target=5S_rRNA;class=Gene/rRNA;Rfam_id=RF00001;E=3.2e-28
LG24	cm	rRNA	8983082	8983200	90.4	-	.	target=5S_rRNA;class=Gene/rRNA;Rfam_id=RF00001;E=5.8e-23
LG24	cm	rRNA	8983365	8983486	103.5	-	.	target=5S_rRNA;class=Gene/rRNA;Rfam_id=RF00001;E=2.4e-26
LG24	cm	rRNA	8983645	8983763	90.3	-	.	target=5S_rRNA;class=Gene/rRNA;Rfam_id=RF00001;E=6.2e-23
LG24	cm	rRNA	8983927	8984045	110.8	-	.	target=5S_rRNA;class=Gene/rRNA;Rfam_id=RF00001;E=4.3e-28
LG24	cm	rRNA	8984203	8984321	110.8	-	.	target=5S_rRNA;class=Gene/rRNA;Rfam_id=RF00001;E=3.2e-28
LG24	cm	rRNA	8984484	8984602	107.5	-	.	target=5S_rRNA;class=Gene/rRNA;Rfam_id=RF00001;E=2.2e-27
LG24	cm	rRNA	8984762	8984880	107.9	-	.	target=5S_rRNA;class=Gene/rRNA;Rfam_id=RF00001;E=1.7e-27
LG24	cm	rRNA	8985038	8985156	110.8	-	.	target=5S_rRNA;class=Gene/rRNA;Rfam_id=RF00001;E=4.3e-28
LG24	cm	rRNA	8985316	8985434	110.8	-	.	target=5S_rRNA;class=Gene/rRNA;Rfam_id=RF00001;E=3.2e-28
LG24	cm	rRNA	8985601	8985719	108.4	-	.	target=5S_rRNA;class=Gene/rRNA;Rfam_id=RF00001;E=1.4e-27
LG24	cm	rRNA	8985884	8986002	110.8	-	.	target=5S_rRNA;class=Gene/rRNA;Rfam_id=RF00001;E=2.2e-28
LG01	cm	miRNA	344493	344594	101	+	.	target=mir-204;class=Gene/miRNA;Rfam_id=RF00646;E=3.8e-29
LG01	cm	miRNA	6715773	6715861	83.3	-	.	target=mir-129;class=Gene/miRNA;Rfam_id=RF00486;E=5.7e-21
LG01	cm	miRNA	13117162	13117225	71.6	+	.	target=mir-155;class=Gene/miRNA;Rfam_id=RF00731;E=9.8e-17
LG01	cm	miRNA	13136415	13136497	76.2	+	.	target=mir-17;class=Gene/miRNA;Rfam_id=RF00051;E=1.2e-20
LG01	cm	miRNA	13136687	13136758	69.3	+	.	target=mir-19;class=Gene/miRNA;Rfam_id=RF00245;E=4.5e-15
LG01	cm	miRNA	13136903	13136985	80.2	+	.	target=mir-17;class=Gene/miRNA;Rfam_id=RF00051;E=7e-22
LG01	cm	miRNA	13137047	13137122	67.6	+	.	target=mir-19;class=Gene/miRNA;Rfam_id=RF00245;E=1.8e-14
LG01	cm	miRNA	18875003	18875064	49.3	+	.	target=mir-9;class=Gene/miRNA;Rfam_id=RF00237;E=7.4e-11
LG01	cm	miRNA	18875003	18875064	82.1	-	.	target=mir-9;class=Gene/miRNA;Rfam_id=RF00237;E=6e-20
LG01	cm	miRNA	23627343	23627428	84.1	+	.	target=mir-190;class=Gene/miRNA;Rfam_id=RF00672;E=3.2e-20
LG01	cm	miRNA	24042771	24042855	85.4	+	.	target=mir-184;class=Gene/miRNA;Rfam_id=RF00657;E=1.3e-20
LG02	cm	miRNA	8586087	8586167	73.1	-	.	target=mir-205;class=Gene/miRNA;Rfam_id=RF00656;E=9e-19
LG02	cm	miRNA	8724988	8725056	67.9	+	.	target=mir-29;class=Gene/miRNA;Rfam_id=RF00074;E=8.4e-16
LG02	cm	miRNA	8725370	8725432	60.7	+	.	target=mir-29;class=Gene/miRNA;Rfam_id=RF00074;E=7.4e-14
LG02	cm	miRNA	9806487	9806568	67.9	+	.	target=let-7;class=Gene/miRNA;Rfam_id=RF00027;E=5e-16
LG02	cm	miRNA	9806791	9806868	59.5	+	.	target=let-7;class=Gene/miRNA;Rfam_id=RF00027;E=1.1e-13
LG02	cm	miRNA	26476216	26476305	90.7	-	.	target=mir-499;class=Gene/miRNA;Rfam_id=RF00745;E=1.2e-21
LG02	cm	miRNA	33754382	33754462	76.4	+	.	target=let-7;class=Gene/miRNA;Rfam_id=RF00027;E=2.3e-18
LG02	cm	miRNA	33754582	33754668	76.7	+	.	target=let-7;class=Gene/miRNA;Rfam_id=RF00027;E=2e-18
LG03	cm	miRNA	1476166	1476271	91.4	-	.	target=mir-217;class=Gene/miRNA;Rfam_id=RF00673;E=1.5e-22
LG03	cm	miRNA	15887054	15887153	96.6	+	.	target=mir-218;class=Gene/miRNA;Rfam_id=RF00255;E=2.8e-24
LG03	cm	miRNA	18412696	18412793	86.9	-	.	target=mir-137;class=Gene/miRNA;Rfam_id=RF00694;E=1.5e-21
LG03	cm	miRNA	18664211	18664303	109.5	-	.	target=mir-365;class=Gene/miRNA;Rfam_id=RF00659;E=5.5e-30
LG03	cm	miRNA	18666956	18667058	64.6	-	.	target=mir-193;class=Gene/miRNA;Rfam_id=RF01895;E=1.5e-16
LG04	cm	miRNA	3709265	3709353	83.6	+	.	target=mir-129;class=Gene/miRNA;Rfam_id=RF00486;E=4.6e-21
LG04	cm	miRNA	5937280	5937366	68.8	-	.	target=let-7;class=Gene/miRNA;Rfam_id=RF00027;E=2.8e-16
LG04	cm	miRNA	6225316	6225396	77.4	+	.	target=let-7;class=Gene/miRNA;Rfam_id=RF00027;E=1.2e-18
LG04	cm	miRNA	6226082	6226167	88.6	+	.	target=let-7;class=Gene/miRNA;Rfam_id=RF00027;E=1e-21
LG04	cm	miRNA	11493376	11493476	95.8	-	.	target=mir-204;class=Gene/miRNA;Rfam_id=RF00646;E=1.7e-27
LG04	cm	miRNA	12027927	12028011	83.1	+	.	target=mir-190;class=Gene/miRNA;Rfam_id=RF00672;E=4e-20
LG04	cm	miRNA	12383720	12383804	86.7	+	.	target=mir-184;class=Gene/miRNA;Rfam_id=RF00657;E=5.9e-21
LG04	cm	miRNA	14546693	14546780	87.2	+	.	target=mir-129;class=Gene/miRNA;Rfam_id=RF00486;E=6.5e-22
LG04	cm	miRNA	15767491	15767568	86.5	-	.	target=mir-96;class=Gene/miRNA;Rfam_id=RF00669;E=5.4e-23
LG04	cm	miRNA	15767665	15767754	98.2	-	.	target=mir-183;class=Gene/miRNA;Rfam_id=RF00663;E=4.1e-27
LG04	cm	miRNA	16240798	16240887	63	+	.	target=mir-135;class=Gene/miRNA;Rfam_id=RF00246;E=4.4e-15
LG04	cm	miRNA	16542470	16542531	50.2	-	.	target=mir-9;class=Gene/miRNA;Rfam_id=RF00237;E=4.1e-11
LG04	cm	miRNA	16542470	16542531	80.1	+	.	target=mir-9;class=Gene/miRNA;Rfam_id=RF00237;E=2.2e-19
LG04	cm	miRNA	17806320	17806417	84.9	+	.	target=mir-210;class=Gene/miRNA;Rfam_id=RF00679;E=1.6e-23
LG04	cm	miRNA	21807165	21807236	76.9	-	.	target=mir-138;class=Gene/miRNA;Rfam_id=RF00671;E=1.7e-18
LG04	cm	miRNA	23696044	23696133	75.2	-	.	target=mir-7;class=Gene/miRNA;Rfam_id=RF00053;E=3.9e-18
LG04	cm	miRNA	26142510	26142598	96	+	.	target=mir-140;class=Gene/miRNA;Rfam_id=RF00678;E=1.2e-26
LG05	cm	miRNA	2636183	2636256	61.1	+	.	target=mir-219;class=Gene/miRNA;Rfam_id=RF00251;E=3.5e-15
LG05	cm	miRNA	6405446	6405520	86.1	+	.	target=mir-181;class=Gene/miRNA;Rfam_id=RF00076;E=1.2e-22
LG05	cm	miRNA	10032912	10032976	84.1	+	.	target=mir-1306;class=Gene/miRNA;Rfam_id=RF01014;E=3.3e-21
LG05	cm	miRNA	16539807	16539866	45.8	-	.	target=mir-9;class=Gene/miRNA;Rfam_id=RF00237;E=6.8e-10
LG05	cm	miRNA	16539807	16539866	78.3	+	.	target=mir-9;class=Gene/miRNA;Rfam_id=RF00237;E=7e-19
LG05	cm	miRNA	18058714	18058801	87.3	+	.	target=mir-22;class=Gene/miRNA;Rfam_id=RF00653;E=7.7e-21
LG05	cm	miRNA	20809234	20809323	75.5	+	.	target=mir-7;class=Gene/miRNA;Rfam_id=RF00053;E=2.1e-18
LG05	cm	miRNA	22492692	22492765	79.9	+	.	target=mir-23;class=Gene/miRNA;Rfam_id=RF00642;E=2.2e-21
LG05	cm	miRNA	22493021	22493103	83.6	+	.	target=mir-27;class=Gene/miRNA;Rfam_id=RF00644;E=5.5e-21
LG05	cm	miRNA	22496744	22496810	74.8	+	.	target=mir-24;class=Gene/miRNA;Rfam_id=RF00178;E=8.1e-21
LG05	cm	miRNA	26045528	26045615	51.5	-	.	target=mir-449;class=Gene/miRNA;Rfam_id=RF00711;E=1.3e-13
LG05	cm	miRNA	28167410	28167495	112.3	+	.	target=mir-455;class=Gene/miRNA;Rfam_id=RF00709;E=1.9e-28
LG05	cm	miRNA	28167410	28167495	63.3	-	.	target=mir-455;class=Gene/miRNA;Rfam_id=RF00709;E=9.3e-15
LG05	cm	miRNA	30466936	30467043	85.6	-	.	target=mir-454;class=Gene/miRNA;Rfam_id=RF00746;E=2.4e-24
LG05	cm	miRNA	30472616	30472700	78.1	-	.	target=mir-301;class=Gene/miRNA;Rfam_id=RF02061;E=6.8e-19
LG05	cm	miRNA	30472994	30473072	57.6	-	.	target=mir-130;class=Gene/miRNA;Rfam_id=RF00258;E=1.1e-12
LG06	cm	miRNA	8710335	8710409	94.4	-	.	target=mir-101;class=Gene/miRNA;Rfam_id=RF00253;E=2.4e-24
LG06	cm	miRNA	12845388	12845464	83.5	+	.	target=mir-181;class=Gene/miRNA;Rfam_id=RF00076;E=4.6e-22
LG06	cm	miRNA	16458167	16458234	85.9	-	.	target=mir-24;class=Gene/miRNA;Rfam_id=RF00178;E=2.5e-24
LG06	cm	miRNA	16460063	16460146	76.8	-	.	target=mir-27;class=Gene/miRNA;Rfam_id=RF00644;E=4.4e-19
LG06	cm	miRNA	16460779	16460858	77.9	-	.	target=mir-23;class=Gene/miRNA;Rfam_id=RF00642;E=8.8e-21
LG06	cm	miRNA	21425405	21425463	71.8	-	.	target=mir-9;class=Gene/miRNA;Rfam_id=RF00237;E=4.3e-17
LG06	cm	miRNA	22592673	22592780	104.9	-	.	target=mir-214;class=Gene/miRNA;Rfam_id=RF00660;E=7.8e-26
LG06	cm	miRNA	22595103	22595202	101.4	-	.	target=mir-199;class=Gene/miRNA;Rfam_id=RF00144;E=1.4e-26
LG07	cm	miRNA	4225016	4225085	33.1	-	.	target=mir-10;class=Gene/miRNA;Rfam_id=RF00104;E=1.7e-07
LG07	cm	miRNA	4225017	4225086	55.7	+	.	target=mir-10;class=Gene/miRNA;Rfam_id=RF00104;E=9.9e-15
LG07	cm	miRNA	4226140	4226216	68	+	.	target=let-7;class=Gene/miRNA;Rfam_id=RF00027;E=7.3e-16
LG07	cm	miRNA	4232626	4232696	62.2	+	.	target=lin-4;class=Gene/miRNA;Rfam_id=RF00052;E=2.9e-15
LG07	cm	miRNA	11203993	11204065	84.8	+	.	target=mir-21;class=Gene/miRNA;Rfam_id=RF00658;E=7.5e-21
LG07	cm	miRNA	12893350	12893433	65.7	-	.	target=mir-551;class=Gene/miRNA;Rfam_id=RF00892;E=1.8e-15
LG07	cm	miRNA	16084122	16084208	95.7	+	.	target=mir-22;class=Gene/miRNA;Rfam_id=RF00653;E=2.7e-23
LG07	cm	miRNA	19638153	19638233	49.8	+	.	target=mir-16;class=Gene/miRNA;Rfam_id=RF00254;E=2.5e-12
LG07	cm	miRNA	19638153	19638233	81.8	-	.	target=mir-16;class=Gene/miRNA;Rfam_id=RF00254;E=5.4e-22
LG07	cm	miRNA	21879576	21879671	79.4	+	.	target=mir-132;class=Gene/miRNA;Rfam_id=RF00662;E=1.1e-19
LG07	cm	miRNA	21879853	21879942	81	+	.	target=mir-132;class=Gene/miRNA;Rfam_id=RF00662;E=5.6e-20
LG07	cm	miRNA	22730224	22730320	97.9	+	.	target=mir-142;class=Gene/miRNA;Rfam_id=RF01896;E=7.2e-23
LG08	cm	miRNA	3851565	3851642	96.5	+	.	target=mir-458;class=Gene/miRNA;Rfam_id=RF00750;E=1.2e-24
LG08	cm	miRNA	7052637	7052719	90.7	-	.	target=mir-2985-2;class=Gene/miRNA;Rfam_id=RF02095;E=6.4e-22
LG08	cm	miRNA	9215839	9215923	63.2	+	.	target=mir-17;class=Gene/miRNA;Rfam_id=RF00051;E=1.8e-16
LG08	cm	miRNA	9216077	9216156	48.4	+	.	target=mir-17;class=Gene/miRNA;Rfam_id=RF00051;E=4.7e-12
LG08	cm	miRNA	9216540	9216623	77.3	+	.	target=mir-25;class=Gene/miRNA;Rfam_id=RF02020;E=2.2e-16
LG08	cm	miRNA	9556458	9556527	74.1	+	.	target=mir-103;class=Gene/miRNA;Rfam_id=RF00129;E=3e-19
LG08	cm	miRNA	13640191	13640275	68.2	+	.	target=mir-194;class=Gene/miRNA;Rfam_id=RF00257;E=4.5e-17
LG08	cm	miRNA	19265047	19265127	94.5	+	.	target=mir-2985-2;class=Gene/miRNA;Rfam_id=RF02095;E=3.7e-23
LG08	cm	miRNA	22796447	22796527	61.7	+	.	target=mir-17;class=Gene/miRNA;Rfam_id=RF00051;E=3.7e-16
LG08	cm	miRNA	31446807	31446911	94.3	+	.	target=mir-143;class=Gene/miRNA;Rfam_id=RF00683;E=7.3e-27
LG08	cm	miRNA	31447538	31447627	88.7	+	.	target=mir-145;class=Gene/miRNA;Rfam_id=RF00675;E=1.3e-22
LG09	cm	miRNA	2653976	2654037	50.3	+	.	target=mir-9;class=Gene/miRNA;Rfam_id=RF00237;E=3.9e-11
LG09	cm	miRNA	2653976	2654037	82.7	-	.	target=mir-9;class=Gene/miRNA;Rfam_id=RF00237;E=4.1e-20
LG09	cm	miRNA	6498967	6499054	68.2	+	.	target=mir-7;class=Gene/miRNA;Rfam_id=RF00053;E=2.4e-16
LG09	cm	miRNA	13833954	13834045	78.1	+	.	target=mir-190;class=Gene/miRNA;Rfam_id=RF00672;E=9.5e-19
LG09	cm	miRNA	15472875	15472955	63.6	-	.	target=mir-196;class=Gene/miRNA;Rfam_id=RF00256;E=4.6e-16
LG09	cm	miRNA	15997483	15997555	59.3	+	.	target=mir-219;class=Gene/miRNA;Rfam_id=RF00251;E=1.1e-14
LG09	cm	miRNA	16641026	16641105	58.4	+	.	target=let-7;class=Gene/miRNA;Rfam_id=RF00027;E=3.1e-13
LG09	cm	miRNA	16647778	16647845	57.1	+	.	target=lin-4;class=Gene/miRNA;Rfam_id=RF00052;E=8.8e-14
LG10	cm	miRNA	2682471	2682547	50	-	.	target=mir-1;class=Gene/miRNA;Rfam_id=RF00103;E=1.7e-10
LG10	cm	miRNA	2682471	2682547	81.2	+	.	target=mir-1;class=Gene/miRNA;Rfam_id=RF00103;E=1e-18
LG10	cm	miRNA	2700757	2700843	57.7	-	.	target=mir-133;class=Gene/miRNA;Rfam_id=RF00446;E=7.1e-15
LG10	cm	miRNA	2700760	2700846	97	+	.	target=mir-133;class=Gene/miRNA;Rfam_id=RF00446;E=9.6e-27
LG10	cm	miRNA	3347167	3347235	66.7	+	.	target=mir-29;class=Gene/miRNA;Rfam_id=RF00074;E=1.7e-15
LG10	cm	miRNA	5193510	5193587	38.7	+	.	target=mir-8;class=Gene/miRNA;Rfam_id=RF00241;E=1.9e-08
LG10	cm	miRNA	5193510	5193587	64.1	-	.	target=mir-8;class=Gene/miRNA;Rfam_id=RF00241;E=1.1e-15
LG10	cm	miRNA	5193697	5193772	36.9	+	.	target=mir-8;class=Gene/miRNA;Rfam_id=RF00241;E=6e-08
LG10	cm	miRNA	5193697	5193772	59.9	-	.	target=mir-8;class=Gene/miRNA;Rfam_id=RF00241;E=1.7e-14
LG10	cm	miRNA	10542093	10542181	72.1	+	.	target=mir-135;class=Gene/miRNA;Rfam_id=RF00246;E=1.1e-17
LG10	cm	miRNA	14848497	14848586	83.8	-	.	target=mir-34;class=Gene/miRNA;Rfam_id=RF00456;E=5.6e-21
LG10	cm	miRNA	16104497	16104577	67.8	+	.	target=let-7;class=Gene/miRNA;Rfam_id=RF00027;E=5.5e-16
LG10	cm	miRNA	16104784	16104874	75.2	+	.	target=let-7;class=Gene/miRNA;Rfam_id=RF00027;E=5e-18
LG10	cm	miRNA	17004545	17004635	84.1	+	.	target=mir-196;class=Gene/miRNA;Rfam_id=RF00256;E=3.7e-22
LG10	cm	miRNA	17041965	17042039	59.5	+	.	target=mir-10;class=Gene/miRNA;Rfam_id=RF00104;E=5.9e-16
LG10	cm	miRNA	17758332	17758414	72.7	+	.	target=let-7;class=Gene/miRNA;Rfam_id=RF00027;E=2.4e-17
LG10	cm	miRNA	17758585	17758671	75.1	+	.	target=let-7;class=Gene/miRNA;Rfam_id=RF00027;E=5.2e-18
LG10	cm	miRNA	19749384	19749475	72.4	+	.	target=mir-1388;class=Gene/miRNA;Rfam_id=RF01945;E=2e-17
LG10	cm	miRNA	19977802	19977882	92.4	-	.	target=mir-124;class=Gene/miRNA;Rfam_id=RF00239;E=3.1e-24
LG10	cm	miRNA	23918697	23918788	85.6	-	.	target=mir-135;class=Gene/miRNA;Rfam_id=RF00246;E=1.8e-21
LG10	cm	miRNA	24842562	24842642	89.9	-	.	target=mir-124;class=Gene/miRNA;Rfam_id=RF00239;E=2.5e-23
LG10	cm	miRNA	25667814	25667916	89.7	-	.	target=mir-205;class=Gene/miRNA;Rfam_id=RF00656;E=1.7e-23
LG10	cm	miRNA	25992715	25992778	74.5	+	.	target=mir-29;class=Gene/miRNA;Rfam_id=RF00074;E=1.3e-17
LG10	cm	miRNA	27677743	27677817	46.9	+	.	target=mir-26;class=Gene/miRNA;Rfam_id=RF00244;E=2.4e-11
LG10	cm	miRNA	27677743	27677817	71.4	-	.	target=mir-26;class=Gene/miRNA;Rfam_id=RF00244;E=1.4e-18
LG10	cm	miRNA	27996542	27996622	69.9	+	.	target=let-7;class=Gene/miRNA;Rfam_id=RF00027;E=1.5e-16
LG10	cm	miRNA	27997089	27997182	63.9	+	.	target=let-7;class=Gene/miRNA;Rfam_id=RF00027;E=6.2e-15
LG11	cm	miRNA	1462816	1462902	51.4	-	.	target=miR-430;class=Gene/miRNA;Rfam_id=RF01413;E=2e-12
LG11	cm	miRNA	1462936	1463002	63.5	-	.	target=miR-430;class=Gene/miRNA;Rfam_id=RF01413;E=4.5e-16
LG11	cm	miRNA	1463103	1463191	87.5	-	.	target=miR-430;class=Gene/miRNA;Rfam_id=RF01413;E=2.4e-23
LG11	cm	miRNA	1463242	1463328	52.1	-	.	target=miR-430;class=Gene/miRNA;Rfam_id=RF01413;E=1.3e-12
LG11	cm	miRNA	1464083	1464171	40.6	+	.	target=miR-430;class=Gene/miRNA;Rfam_id=RF01413;E=3.7e-09
LG11	cm	miRNA	1464093	1464181	87.9	-	.	target=miR-430;class=Gene/miRNA;Rfam_id=RF01413;E=1.9e-23
LG11	cm	miRNA	1464102	1464181	70	-	.	target=miR-430;class=Gene/miRNA;Rfam_id=RF01413;E=4.7e-18
LG11	cm	miRNA	1464243	1464329	51.4	-	.	target=miR-430;class=Gene/miRNA;Rfam_id=RF01413;E=2e-12
LG11	cm	miRNA	1464524	1464602	79.1	-	.	target=miR-430;class=Gene/miRNA;Rfam_id=RF01413;E=8.8e-21
LG11	cm	miRNA	1464524	1464612	87.1	-	.	target=miR-430;class=Gene/miRNA;Rfam_id=RF01413;E=3.3e-23
LG11	cm	miRNA	1464788	1464876	46.7	-	.	target=miR-430;class=Gene/miRNA;Rfam_id=RF01413;E=5.3e-11
LG11	cm	miRNA	1465509	1465597	40.6	+	.	target=miR-430;class=Gene/miRNA;Rfam_id=RF01413;E=3.7e-09
LG11	cm	miRNA	1465519	1465602	82.1	-	.	target=miR-430;class=Gene/miRNA;Rfam_id=RF01413;E=1.1e-21
LG11	cm	miRNA	1465519	1465607	87.9	-	.	target=miR-430;class=Gene/miRNA;Rfam_id=RF01413;E=1.9e-23
LG11	cm	miRNA	1465789	1465878	80.6	-	.	target=miR-430;class=Gene/miRNA;Rfam_id=RF01413;E=3e-21
LG11	cm	miRNA	1465802	1465878	64.4	-	.	target=miR-430;class=Gene/miRNA;Rfam_id=RF01413;E=2.3e-16
LG11	cm	miRNA	1465950	1466002	51.8	-	.	target=miR-430;class=Gene/miRNA;Rfam_id=RF01413;E=1.6e-12
LG11	cm	miRNA	1466091	1466179	47.7	-	.	target=miR-430;class=Gene/miRNA;Rfam_id=RF01413;E=2.7e-11
LG11	cm	miRNA	1466102	1466179	41.3	-	.	target=miR-430;class=Gene/miRNA;Rfam_id=RF01413;E=2.3e-09
LG11	cm	miRNA	1466213	1466301	46.7	-	.	target=miR-430;class=Gene/miRNA;Rfam_id=RF01413;E=5.3e-11
LG11	cm	miRNA	1466946	1467002	58.7	-	.	target=miR-430;class=Gene/miRNA;Rfam_id=RF01413;E=1.3e-14
LG11	cm	miRNA	1467096	1467182	51.4	-	.	target=miR-430;class=Gene/miRNA;Rfam_id=RF01413;E=2e-12
LG11	cm	miRNA	1467102	1467184	41.4	-	.	target=miR-430;class=Gene/miRNA;Rfam_id=RF01413;E=2.1e-09
LG11	cm	miRNA	1467216	1467301	74.1	-	.	target=miR-430;class=Gene/miRNA;Rfam_id=RF01413;E=2.8e-19
LG11	cm	miRNA	1467216	1467305	81.6	-	.	target=miR-430;class=Gene/miRNA;Rfam_id=RF01413;E=2.3e-21
LG11	cm	miRNA	1467377	1467469	79	-	.	target=miR-430;class=Gene/miRNA;Rfam_id=RF01413;E=1.4e-20
LG11	cm	miRNA	1467522	1467598	47.1	-	.	target=miR-430;class=Gene/miRNA;Rfam_id=RF01413;E=3.9e-11
LG11	cm	miRNA	1467805	1467893	87.5	-	.	target=miR-430;class=Gene/miRNA;Rfam_id=RF01413;E=2.4e-23
LG11	cm	miRNA	1467944	1468030	52.1	-	.	target=miR-430;class=Gene/miRNA;Rfam_id=RF01413;E=1.3e-12
LG11	cm	miRNA	1468785	1468873	40.6	+	.	target=miR-430;class=Gene/miRNA;Rfam_id=RF01413;E=3.7e-09
LG11	cm	miRNA	1468795	1468883	87.9	-	.	target=miR-430;class=Gene/miRNA;Rfam_id=RF01413;E=1.9e-23
LG11	cm	miRNA	1468802	1468883	72.7	-	.	target=miR-430;class=Gene/miRNA;Rfam_id=RF01413;E=7.1e-19
LG11	cm	miRNA	1468945	1469031	51.4	-	.	target=miR-430;class=Gene/miRNA;Rfam_id=RF01413;E=2e-12
LG11	cm	miRNA	1469226	1469302	75.6	-	.	target=miR-430;class=Gene/miRNA;Rfam_id=RF01413;E=9.6e-20
LG11	cm	miRNA	1469226	1469314	86.3	-	.	target=miR-430;class=Gene/miRNA;Rfam_id=RF01413;E=5.8e-23
LG11	cm	miRNA	1469364	1469450	51.4	-	.	target=miR-430;class=Gene/miRNA;Rfam_id=RF01413;E=3e-12
LG11	cm	miRNA	1469484	1469573	79.3	-	.	target=miR-430;class=Gene/miRNA;Rfam_id=RF01413;E=1.1e-20
LG11	cm	miRNA	1469502	1469573	54.3	-	.	target=miR-430;class=Gene/miRNA;Rfam_id=RF01413;E=2.7e-13
LG11	cm	miRNA	1469644	1469702	59.1	-	.	target=miR-430;class=Gene/miRNA;Rfam_id=RF01413;E=9.8e-15
LG11	cm	miRNA	1469644	1469732	87.5	-	.	target=miR-430;class=Gene/miRNA;Rfam_id=RF01413;E=3.6e-23
LG11	cm	miRNA	1469783	1469869	52.1	-	.	target=miR-430;class=Gene/miRNA;Rfam_id=RF01413;E=1.9e-12
LG11	cm	miRNA	1469903	1469991	46.7	-	.	target=miR-430;class=Gene/miRNA;Rfam_id=RF01413;E=5.3e-11
LG11	cm	miRNA	1470625	1470713	40.6	+	.	target=miR-430;class=Gene/miRNA;Rfam_id=RF01413;E=5.5e-09
LG11	cm	miRNA	1470635	1470702	70.9	-	.	target=miR-430;class=Gene/miRNA;Rfam_id=RF01413;E=2.5e-18
LG11	cm	miRNA	1470635	1470723	87.9	-	.	target=miR-430;class=Gene/miRNA;Rfam_id=RF01413;E=2.8e-23
LG11	cm	miRNA	1470785	1470871	51.4	-	.	target=miR-430;class=Gene/miRNA;Rfam_id=RF01413;E=3e-12
LG11	cm	miRNA	1470905	1470994	81.6	-	.	target=miR-430;class=Gene/miRNA;Rfam_id=RF01413;E=1.5e-21
LG11	cm	miRNA	1471205	1471291	51.4	-	.	target=miR-430;class=Gene/miRNA;Rfam_id=RF01413;E=2e-12
LG11	cm	miRNA	1471325	1471402	69.3	-	.	target=miR-430;class=Gene/miRNA;Rfam_id=RF01413;E=7.8e-18
LG11	cm	miRNA	1471325	1471414	80	-	.	target=miR-430;class=Gene/miRNA;Rfam_id=RF01413;E=6.8e-21
LG11	cm	miRNA	1471485	1471573	87.5	-	.	target=miR-430;class=Gene/miRNA;Rfam_id=RF01413;E=3.6e-23
LG11	cm	miRNA	1471502	1471573	57.2	-	.	target=miR-430;class=Gene/miRNA;Rfam_id=RF01413;E=3.7e-14
LG11	cm	miRNA	1471624	1471700	48.2	-	.	target=miR-430;class=Gene/miRNA;Rfam_id=RF01413;E=1.9e-11
LG11	cm	miRNA	1471624	1471710	52.1	-	.	target=miR-430;class=Gene/miRNA;Rfam_id=RF01413;E=1.3e-12
LG11	cm	miRNA	1472466	1472554	40.6	+	.	target=miR-430;class=Gene/miRNA;Rfam_id=RF01413;E=5.5e-09
LG11	cm	miRNA	1472476	1472564	87.9	-	.	target=miR-430;class=Gene/miRNA;Rfam_id=RF01413;E=2.8e-23
LG11	cm	miRNA	1472502	1472564	43.8	-	.	target=miR-430;class=Gene/miRNA;Rfam_id=RF01413;E=4.1e-10
LG11	cm	miRNA	1472626	1472702	47.2	-	.	target=miR-430;class=Gene/miRNA;Rfam_id=RF01413;E=3.8e-11
LG11	cm	miRNA	1472626	1472712	51.4	-	.	target=miR-430;class=Gene/miRNA;Rfam_id=RF01413;E=2e-12
LG11	cm	miRNA	1472746	1472802	53.2	-	.	target=miR-430;class=Gene/miRNA;Rfam_id=RF01413;E=5.8e-13
LG11	cm	miRNA	1472932	1473002	73.2	-	.	target=miR-430;class=Gene/miRNA;Rfam_id=RF01413;E=5.2e-19
LG11	cm	miRNA	1472932	1473020	87.5	-	.	target=miR-430;class=Gene/miRNA;Rfam_id=RF01413;E=3.6e-23
LG11	cm	miRNA	1473071	1473157	52.1	-	.	target=miR-430;class=Gene/miRNA;Rfam_id=RF01413;E=1.9e-12
LG11	cm	miRNA	1473191	1473279	46.7	-	.	target=miR-430;class=Gene/miRNA;Rfam_id=RF01413;E=5.3e-11
LG11	cm	miRNA	1473912	1474000	40.6	+	.	target=miR-430;class=Gene/miRNA;Rfam_id=RF01413;E=3.7e-09
LG11	cm	miRNA	1473922	1474001	80.3	-	.	target=miR-430;class=Gene/miRNA;Rfam_id=RF01413;E=3.6e-21
LG11	cm	miRNA	1473922	1474010	87.9	-	.	target=miR-430;class=Gene/miRNA;Rfam_id=RF01413;E=2.8e-23
LG11	cm	miRNA	1474072	1474158	51.4	-	.	target=miR-430;class=Gene/miRNA;Rfam_id=RF01413;E=3e-12
LG11	cm	miRNA	1474192	1474281	81.6	-	.	target=miR-430;class=Gene/miRNA;Rfam_id=RF01413;E=1.5e-21
LG11	cm	miRNA	1474202	1474281	67.1	-	.	target=miR-430;class=Gene/miRNA;Rfam_id=RF01413;E=3.6e-17
LG11	cm	miRNA	1474353	1474402	47	-	.	target=miR-430;class=Gene/miRNA;Rfam_id=RF01413;E=4.3e-11
LG11	cm	miRNA	1474492	1474578	51.4	-	.	target=miR-430;class=Gene/miRNA;Rfam_id=RF01413;E=2e-12
LG11	cm	miRNA	1474612	1474701	78.2	-	.	target=miR-430;class=Gene/miRNA;Rfam_id=RF01413;E=1.6e-20
LG11	cm	miRNA	1474794	1474882	87.5	-	.	target=miR-430;class=Gene/miRNA;Rfam_id=RF01413;E=2.4e-23
LG11	cm	miRNA	1474802	1474882	71.1	-	.	target=miR-430;class=Gene/miRNA;Rfam_id=RF01413;E=2.2e-18
LG11	cm	miRNA	1474941	1475027	51.4	-	.	target=miR-430;class=Gene/miRNA;Rfam_id=RF01413;E=2e-12
LG11	cm	miRNA	1475225	1475302	78.7	-	.	target=miR-430;class=Gene/miRNA;Rfam_id=RF01413;E=1.1e-20
LG11	cm	miRNA	1475225	1475313	87.5	-	.	target=miR-430;class=Gene/miRNA;Rfam_id=RF01413;E=2.4e-23
LG11	cm	miRNA	1475364	1475450	52.1	-	.	target=miR-430;class=Gene/miRNA;Rfam_id=RF01413;E=1.9e-12
LG11	cm	miRNA	1475484	1475572	46.7	-	.	target=miR-430;class=Gene/miRNA;Rfam_id=RF01413;E=7.9e-11
LG11	cm	miRNA	1476205	1476293	40.6	+	.	target=miR-430;class=Gene/miRNA;Rfam_id=RF01413;E=3.7e-09
LG11	cm	miRNA	1476215	1476302	86.1	-	.	target=miR-430;class=Gene/miRNA;Rfam_id=RF01413;E=6.3e-23
LG11	cm	miRNA	1476215	1476303	87.9	-	.	target=miR-430;class=Gene/miRNA;Rfam_id=RF01413;E=1.9e-23
LG11	cm	miRNA	1476484	1476573	81.6	-	.	target=miR-430;class=Gene/miRNA;Rfam_id=RF01413;E=2.3e-21
LG11	cm	miRNA	1476502	1476573	56.6	-	.	target=miR-430;class=Gene/miRNA;Rfam_id=RF01413;E=5.3e-14
LG11	cm	miRNA	1476645	1476702	59.2	-	.	target=miR-430;class=Gene/miRNA;Rfam_id=RF01413;E=9e-15
LG11	cm	miRNA	1476791	1476877	51.4	-	.	target=miR-430;class=Gene/miRNA;Rfam_id=RF01413;E=2e-12
LG11	cm	miRNA	1476911	1477000	79.3	-	.	target=miR-430;class=Gene/miRNA;Rfam_id=RF01413;E=7.7e-21
LG11	cm	miRNA	1477072	1477160	87.5	-	.	target=miR-430;class=Gene/miRNA;Rfam_id=RF01413;E=3.6e-23
LG11	cm	miRNA	1477211	1477297	52.1	-	.	target=miR-430;class=Gene/miRNA;Rfam_id=RF01413;E=1.3e-12
LG11	cm	miRNA	1478060	1478148	40.6	+	.	target=miR-430;class=Gene/miRNA;Rfam_id=RF01413;E=5.5e-09
LG11	cm	miRNA	1478070	1478158	87.9	-	.	target=miR-430;class=Gene/miRNA;Rfam_id=RF01413;E=2.8e-23
LG11	cm	miRNA	1478220	1478296	47.1	-	.	target=miR-430;class=Gene/miRNA;Rfam_id=RF01413;E=3.9e-11
LG11	cm	miRNA	1478220	1478306	51.4	-	.	target=miR-430;class=Gene/miRNA;Rfam_id=RF01413;E=2e-12
LG11	cm	miRNA	1478340	1478402	59.7	-	.	target=miR-430;class=Gene/miRNA;Rfam_id=RF01413;E=6.3e-15
LG11	cm	miRNA	1478501	1478589	87.5	-	.	target=miR-430;class=Gene/miRNA;Rfam_id=RF01413;E=2.4e-23
LG11	cm	miRNA	1478502	1478589	80	-	.	target=miR-430;class=Gene/miRNA;Rfam_id=RF01413;E=4.7e-21
LG11	cm	miRNA	1478640	1478726	51.4	-	.	target=miR-430;class=Gene/miRNA;Rfam_id=RF01413;E=2e-12
LG11	cm	miRNA	1478921	1479002	80.8	-	.	target=miR-430;class=Gene/miRNA;Rfam_id=RF01413;E=2.6e-21
LG11	cm	miRNA	1478921	1479009	87.5	-	.	target=miR-430;class=Gene/miRNA;Rfam_id=RF01413;E=2.4e-23
LG11	cm	miRNA	1479273	1479359	52.1	-	.	target=miR-430;class=Gene/miRNA;Rfam_id=RF01413;E=1.6e-12
LG11	cm	miRNA	1479393	1479481	46.7	-	.	target=miR-430;class=Gene/miRNA;Rfam_id=RF01413;E=6.7e-11
LG11	cm	miRNA	1480274	1480360	51.4	-	.	target=miR-430;class=Gene/miRNA;Rfam_id=RF01413;E=3e-12
LG11	cm	miRNA	1480394	1480483	81.6	-	.	target=miR-430;class=Gene/miRNA;Rfam_id=RF01413;E=2.3e-21
LG11	cm	miRNA	1480700	1480786	52.1	-	.	target=miR-430;class=Gene/miRNA;Rfam_id=RF01413;E=1.3e-12
LG11	cm	miRNA	1481700	1481786	51.4	-	.	target=miR-430;class=Gene/miRNA;Rfam_id=RF01413;E=2e-12
LG11	cm	miRNA	1481820	1481888	65.5	-	.	target=miR-430;class=Gene/miRNA;Rfam_id=RF01413;E=1.1e-16
LG11	cm	miRNA	1482120	1482206	51.4	-	.	target=miR-430;class=Gene/miRNA;Rfam_id=RF01413;E=2e-12
LG11	cm	miRNA	1482240	1482288	41.1	-	.	target=miR-430;class=Gene/miRNA;Rfam_id=RF01413;E=2.6e-09
LG11	cm	miRNA	1482551	1482637	51.4	-	.	target=miR-430;class=Gene/miRNA;Rfam_id=RF01413;E=2e-12
LG11	cm	miRNA	1482971	1483057	52.1	-	.	target=miR-430;class=Gene/miRNA;Rfam_id=RF01413;E=1.9e-12
LG11	cm	miRNA	1483091	1483179	46.7	-	.	target=miR-430;class=Gene/miRNA;Rfam_id=RF01413;E=7.9e-11
LG11	cm	miRNA	1483971	1484057	51.4	-	.	target=miR-430;class=Gene/miRNA;Rfam_id=RF01413;E=3e-12
LG11	cm	miRNA	1484091	1484180	81.6	-	.	target=miR-430;class=Gene/miRNA;Rfam_id=RF01413;E=2.3e-21
LG11	cm	miRNA	1484391	1484477	51.4	-	.	target=miR-430;class=Gene/miRNA;Rfam_id=RF01413;E=2e-12
LG11	cm	miRNA	1484511	1484588	70.3	-	.	target=miR-430;class=Gene/miRNA;Rfam_id=RF01413;E=4e-18
LG11	cm	miRNA	1484811	1484897	52.1	-	.	target=miR-430;class=Gene/miRNA;Rfam_id=RF01413;E=1.3e-12
LG11	cm	miRNA	1485812	1485898	51.4	-	.	target=miR-430;class=Gene/miRNA;Rfam_id=RF01413;E=2e-12
LG11	cm	miRNA	1485932	1485988	53.2	-	.	target=miR-430;class=Gene/miRNA;Rfam_id=RF01413;E=5.8e-13
LG11	cm	miRNA	1486243	1486329	51.4	-	.	target=miR-430;class=Gene/miRNA;Rfam_id=RF01413;E=2e-12
LG11	cm	miRNA	1486670	1486756	52.1	-	.	target=miR-430;class=Gene/miRNA;Rfam_id=RF01413;E=1.9e-12
LG11	cm	miRNA	1486790	1486878	46.7	-	.	target=miR-430;class=Gene/miRNA;Rfam_id=RF01413;E=7.9e-11
LG11	cm	miRNA	1487729	1487815	51.4	-	.	target=miR-430;class=Gene/miRNA;Rfam_id=RF01413;E=2e-12
LG11	cm	miRNA	1488162	1488248	51.4	-	.	target=miR-430;class=Gene/miRNA;Rfam_id=RF01413;E=3e-12
LG11	cm	miRNA	1488282	1488371	81.6	-	.	target=miR-430;class=Gene/miRNA;Rfam_id=RF01413;E=2.3e-21
LG11	cm	miRNA	1488588	1488670	41.4	-	.	target=miR-430;class=Gene/miRNA;Rfam_id=RF01413;E=2.1e-09
LG11	cm	miRNA	1488702	1488787	74.1	-	.	target=miR-430;class=Gene/miRNA;Rfam_id=RF01413;E=2.8e-19
LG11	cm	miRNA	1489002	1489088	52.1	-	.	target=miR-430;class=Gene/miRNA;Rfam_id=RF01413;E=1.3e-12
LG11	cm	miRNA	1490002	1490088	51.4	-	.	target=miR-430;class=Gene/miRNA;Rfam_id=RF01413;E=2e-12
LG11	cm	miRNA	1490122	1490188	63.5	-	.	target=miR-430;class=Gene/miRNA;Rfam_id=RF01413;E=4.5e-16
LG11	cm	miRNA	1490422	1490508	52.1	-	.	target=miR-430;class=Gene/miRNA;Rfam_id=RF01413;E=1.3e-12
LG11	cm	miRNA	1976898	1977001	103.8	-	.	target=mir-456;class=Gene/miRNA;Rfam_id=RF00878;E=4.1e-28
LG11	cm	miRNA	5306305	5306365	70.1	+	.	target=mir-30;class=Gene/miRNA;Rfam_id=RF00131;E=3.8e-16
LG11	cm	miRNA	7321888	7321971	89	-	.	target=mir-202;class=Gene/miRNA;Rfam_id=RF00705;E=2.7e-22
LG11	cm	miRNA	14395535	14395625	62	+	.	target=mir-146;class=Gene/miRNA;Rfam_id=RF00691;E=8.9e-15
LG11	cm	miRNA	15832410	15832498	74.6	+	.	target=mir-216;class=Gene/miRNA;Rfam_id=RF00654;E=3.8e-18
LG11	cm	miRNA	15833204	15833293	76.6	+	.	target=mir-216;class=Gene/miRNA;Rfam_id=RF00654;E=1e-18
LG11	cm	miRNA	15833789	15833879	92.5	+	.	target=mir-217;class=Gene/miRNA;Rfam_id=RF00673;E=7.7e-23
LG11	cm	miRNA	22332290	22332367	95	-	.	target=mir-103;class=Gene/miRNA;Rfam_id=RF00129;E=1.6e-25
LG11	cm	miRNA	24457488	24457557	48	-	.	target=mir-10;class=Gene/miRNA;Rfam_id=RF00104;E=1.9e-12
LG12	cm	miRNA	5650385	5650459	42.7	-	.	target=mir-26;class=Gene/miRNA;Rfam_id=RF00244;E=4.3e-10
LG12	cm	miRNA	8025288	8025356	87.5	+	.	target=mir-375;class=Gene/miRNA;Rfam_id=RF00700;E=4.5e-20
LG12	cm	miRNA	12174875	12174960	94.2	-	.	target=mir-153;class=Gene/miRNA;Rfam_id=RF00650;E=6.2e-23
LG12	cm	miRNA	15319678	15319752	35.4	-	.	target=mir-10;class=Gene/miRNA;Rfam_id=RF00104;E=3e-08
LG12	cm	miRNA	15319679	15319753	76.1	+	.	target=mir-10;class=Gene/miRNA;Rfam_id=RF00104;E=2.9e-21
LG12	cm	miRNA	15453196	15453282	66.1	+	.	target=mir-148;class=Gene/miRNA;Rfam_id=RF00248;E=1.3e-16
LG12	cm	miRNA	16229714	16229789	67	-	.	target=mir-92;class=Gene/miRNA;Rfam_id=RF00464;E=3.3e-19
LG12	cm	miRNA	16229714	16229791	74.7	-	.	target=mir-92;class=Gene/miRNA;Rfam_id=RF00464;E=1e-21
LG12	cm	miRNA	16229820	16229889	59	-	.	target=mir-19;class=Gene/miRNA;Rfam_id=RF00245;E=1.9e-12
LG12	cm	miRNA	16229943	16230024	81.8	-	.	target=mir-17;class=Gene/miRNA;Rfam_id=RF00051;E=2.3e-22
LG12	cm	miRNA	16230120	16230189	65.7	-	.	target=mir-19;class=Gene/miRNA;Rfam_id=RF00245;E=3.7e-14
LG12	cm	miRNA	16230762	16230842	84.8	-	.	target=mir-17;class=Gene/miRNA;Rfam_id=RF00051;E=2.6e-23
LG12	cm	miRNA	19121839	19121918	52.9	+	.	target=mir-16;class=Gene/miRNA;Rfam_id=RF00254;E=2.9e-13
LG12	cm	miRNA	19121839	19121918	68	-	.	target=mir-16;class=Gene/miRNA;Rfam_id=RF00254;E=7.9e-18
LG12	cm	miRNA	19122081	19122165	61.5	-	.	target=mir-15;class=Gene/miRNA;Rfam_id=RF00455;E=9.4e-14
LG12	cm	miRNA	26829733	26829800	77.7	+	.	target=mir-221;class=Gene/miRNA;Rfam_id=RF00651;E=2e-18
LG12	cm	miRNA	26830225	26830295	75.2	+	.	target=mir-221;class=Gene/miRNA;Rfam_id=RF00651;E=9.2e-18
LG13	cm	miRNA	4379690	4379776	101.3	+	.	target=mir-153;class=Gene/miRNA;Rfam_id=RF00650;E=1.1e-24
LG13	cm	miRNA	9582674	9582756	80.4	+	.	target=mir-27;class=Gene/miRNA;Rfam_id=RF00644;E=4.2e-20
LG13	cm	miRNA	9583260	9583320	51.2	+	.	target=mir-24;class=Gene/miRNA;Rfam_id=RF00178;E=2.4e-13
LG13	cm	miRNA	11334434	11334510	78.4	+	.	target=mir-23;class=Gene/miRNA;Rfam_id=RF00642;E=9.3e-21
LG13	cm	miRNA	11335324	11335406	73	+	.	target=mir-27;class=Gene/miRNA;Rfam_id=RF00644;E=4.9e-18
LG13	cm	miRNA	11337054	11337121	83.3	+	.	target=mir-24;class=Gene/miRNA;Rfam_id=RF00178;E=2.5e-23
LG13	cm	miRNA	11633333	11633410	45.4	-	.	target=mir-1;class=Gene/miRNA;Rfam_id=RF00103;E=3e-09
LG13	cm	miRNA	11633333	11633410	81.3	+	.	target=mir-1;class=Gene/miRNA;Rfam_id=RF00103;E=1e-18
LG13	cm	miRNA	11637207	11637293	55.8	-	.	target=mir-133;class=Gene/miRNA;Rfam_id=RF00446;E=4e-14
LG13	cm	miRNA	11637210	11637296	94.8	+	.	target=mir-133;class=Gene/miRNA;Rfam_id=RF00446;E=6.6e-26
LG13	cm	miRNA	11957320	11957396	99	+	.	target=mir-460;class=Gene/miRNA;Rfam_id=RF00712;E=5.2e-27
LG13	cm	miRNA	16882021	16882099	82	-	.	target=mir-181;class=Gene/miRNA;Rfam_id=RF00076;E=1.3e-21
LG13	cm	miRNA	17182919	17182975	71.8	+	.	target=mir-9;class=Gene/miRNA;Rfam_id=RF00237;E=6.4e-17
LG13	cm	miRNA	17400442	17400528	73.4	-	.	target=mir-7;class=Gene/miRNA;Rfam_id=RF00053;E=1.2e-17
LG13	cm	miRNA	21132222	21132331	110.7	-	.	target=mir-214;class=Gene/miRNA;Rfam_id=RF00660;E=3.1e-27
LG13	cm	miRNA	21134072	21134163	88.9	-	.	target=mir-199;class=Gene/miRNA;Rfam_id=RF00144;E=3.9e-23
LG13	cm	miRNA	22454294	22454363	65.8	-	.	target=mir-26;class=Gene/miRNA;Rfam_id=RF00244;E=6.1e-17
LG13	cm	miRNA	27207863	27207942	89.1	-	.	target=mir-124;class=Gene/miRNA;Rfam_id=RF00239;E=4.2e-23
LG13	cm	miRNA	27207864	27207943	40.3	+	.	target=mir-124;class=Gene/miRNA;Rfam_id=RF00239;E=7e-09
LG14	cm	miRNA	629192	629275	96.4	-	.	target=mir-301;class=Gene/miRNA;Rfam_id=RF02061;E=3.7e-24
LG14	cm	miRNA	4301849	4301920	66.6	-	.	target=lin-4;class=Gene/miRNA;Rfam_id=RF00052;E=1.5e-16
LG14	cm	miRNA	4310367	4310442	68.3	-	.	target=let-7;class=Gene/miRNA;Rfam_id=RF00027;E=5.8e-16
LG14	cm	miRNA	4310742	4310813	65.1	-	.	target=mir-10;class=Gene/miRNA;Rfam_id=RF00104;E=6.5e-18
LG14	cm	miRNA	4310743	4310814	33.1	+	.	target=mir-10;class=Gene/miRNA;Rfam_id=RF00104;E=1.1e-07
LG14	cm	miRNA	5993180	5993252	87.9	-	.	target=mir-21;class=Gene/miRNA;Rfam_id=RF00658;E=9.9e-22
LG14	cm	miRNA	6700332	6700423	94	-	.	target=mir-142;class=Gene/miRNA;Rfam_id=RF01896;E=7.5e-22
LG14	cm	miRNA	7002894	7002979	96.2	+	.	target=mir-144;class=Gene/miRNA;Rfam_id=RF00682;E=3.7e-24
LG14	cm	miRNA	7003040	7003111	74.2	+	.	target=mir-451;class=Gene/miRNA;Rfam_id=RF00722;E=4.9e-18
LG14	cm	miRNA	7854951	7855056	86.1	-	.	target=mir-192;class=Gene/miRNA;Rfam_id=RF00130;E=6.1e-23
LG14	cm	miRNA	7855203	7855288	74.2	-	.	target=mir-194;class=Gene/miRNA;Rfam_id=RF00257;E=5e-19
LG14	cm	miRNA	9749181	9749290	104.5	+	.	target=mir-223;class=Gene/miRNA;Rfam_id=RF00664;E=3.2e-28
LG14	cm	miRNA	10397860	10397923	69.2	-	.	target=mir-2985-2;class=Gene/miRNA;Rfam_id=RF02095;E=3.4e-16
LG14	cm	miRNA	11103499	11103568	46.5	-	.	target=mir-10;class=Gene/miRNA;Rfam_id=RF00104;E=8.7e-12
LG14	cm	miRNA	11103500	11103569	71.9	+	.	target=mir-10;class=Gene/miRNA;Rfam_id=RF00104;E=6.2e-20
LG14	cm	miRNA	11104134	11104210	66.1	+	.	target=let-7;class=Gene/miRNA;Rfam_id=RF00027;E=1.6e-15
LG14	cm	miRNA	11109004	11109074	63	+	.	target=lin-4;class=Gene/miRNA;Rfam_id=RF00052;E=2.5e-15
LG14	cm	miRNA	15969505	15969593	82.6	-	.	target=mir-132;class=Gene/miRNA;Rfam_id=RF00662;E=2.1e-20
LG14	cm	miRNA	15969843	15969937	83.6	-	.	target=mir-132;class=Gene/miRNA;Rfam_id=RF00662;E=1.1e-20
LG14	cm	miRNA	23479730	23479816	76.2	-	.	target=mir-2985-2;class=Gene/miRNA;Rfam_id=RF02095;E=4e-18
LG15	cm	miRNA	14019081	14019160	92.1	+	.	target=mir-203;class=Gene/miRNA;Rfam_id=RF00696;E=2e-25
LG15	cm	miRNA	17198243	17198323	90.1	+	.	target=mir-124;class=Gene/miRNA;Rfam_id=RF00239;E=1.4e-23
LG15	cm	miRNA	17198277	17198323	46.6	+	.	target=mir-124;class=Gene/miRNA;Rfam_id=RF00239;E=6.8e-11
LG15	cm	miRNA	24188688	24188765	92.8	-	.	target=mir-103;class=Gene/miRNA;Rfam_id=RF00129;E=7.5e-25
LG16	cm	miRNA	14240832	14240920	73.9	-	.	target=mir-133;class=Gene/miRNA;Rfam_id=RF00446;E=9e-20
LG16	cm	miRNA	14241733	14241808	67.7	-	.	target=mir-1;class=Gene/miRNA;Rfam_id=RF00103;E=3.8e-15
LG16	cm	miRNA	24181273	24181354	88.8	+	.	target=mir-124;class=Gene/miRNA;Rfam_id=RF00239;E=3.6e-23
LG16	cm	miRNA	28445386	28445466	80.9	-	.	target=mir-203;class=Gene/miRNA;Rfam_id=RF00696;E=8e-22
LG17	cm	miRNA	5077239	5077312	58.5	+	.	target=mir-219;class=Gene/miRNA;Rfam_id=RF00251;E=2e-14
LG17	cm	miRNA	11447567	11447646	58.7	+	.	target=let-7;class=Gene/miRNA;Rfam_id=RF00027;E=2.5e-13
LG17	cm	miRNA	11452223	11452290	55.6	+	.	target=lin-4;class=Gene/miRNA;Rfam_id=RF00052;E=3.5e-13
LG17	cm	miRNA	11525368	11525429	49.3	-	.	target=mir-9;class=Gene/miRNA;Rfam_id=RF00237;E=7.6e-11
LG17	cm	miRNA	11525368	11525429	81.4	+	.	target=mir-9;class=Gene/miRNA;Rfam_id=RF00237;E=9.7e-20
LG17	cm	miRNA	15300901	15300958	57.2	-	.	target=mir-30;class=Gene/miRNA;Rfam_id=RF00131;E=1.7e-12
LG17	cm	miRNA	15301226	15301288	70.4	-	.	target=mir-30;class=Gene/miRNA;Rfam_id=RF00131;E=4.6e-16
LG17	cm	miRNA	15592938	15593021	77.5	+	.	target=mir-128;class=Gene/miRNA;Rfam_id=RF00649;E=4.7e-21
LG17	cm	miRNA	16004969	16005077	77.5	+	.	target=mir-187;class=Gene/miRNA;Rfam_id=RF00674;E=6.2e-21
LG17	cm	miRNA	17082941	17083031	93	-	.	target=mir-489;class=Gene/miRNA;Rfam_id=RF00698;E=2.3e-23
LG17	cm	miRNA	18066177	18066266	92.3	-	.	target=mir-196;class=Gene/miRNA;Rfam_id=RF00256;E=1.9e-24
LG17	cm	miRNA	20544138	20544209	72.5	-	.	target=mir-138;class=Gene/miRNA;Rfam_id=RF00671;E=2.8e-17
LG17	cm	miRNA	22389068	22389125	68.7	-	.	target=mir-30;class=Gene/miRNA;Rfam_id=RF00131;E=8.8e-16
LG18	cm	miRNA	6356674	6356746	86.6	+	.	target=mir-126;class=Gene/miRNA;Rfam_id=RF00701;E=1.1e-21
LG18	cm	miRNA	8141373	8141458	110	-	.	target=mir-455;class=Gene/miRNA;Rfam_id=RF00709;E=5.7e-28
LG18	cm	miRNA	8141373	8141458	58.1	+	.	target=mir-455;class=Gene/miRNA;Rfam_id=RF00709;E=1.8e-13
LG18	cm	miRNA	9620488	9620561	99.1	-	.	target=mir-122;class=Gene/miRNA;Rfam_id=RF00684;E=2e-26
LG18	cm	miRNA	11757069	11757151	78.8	+	.	target=mir-199;class=Gene/miRNA;Rfam_id=RF00144;E=3.3e-20
LG18	cm	miRNA	14189210	14189294	82.9	-	.	target=mir-301;class=Gene/miRNA;Rfam_id=RF02061;E=2.1e-20
LG18	cm	miRNA	15101969	15102026	39.6	-	.	target=mir-219;class=Gene/miRNA;Rfam_id=RF00251;E=5.7e-09
LG18	cm	miRNA	15377776	15377850	87.9	+	.	target=mir-101;class=Gene/miRNA;Rfam_id=RF00253;E=1.2e-22
LG18	cm	miRNA	21845615	21845689	71.3	+	.	target=mir-23;class=Gene/miRNA;Rfam_id=RF00642;E=1.2e-18
LG18	cm	miRNA	21845969	21846041	56.5	+	.	target=mir-27;class=Gene/miRNA;Rfam_id=RF00644;E=1.9e-13
LG18	cm	miRNA	21848294	21848360	73.2	+	.	target=mir-24;class=Gene/miRNA;Rfam_id=RF00178;E=2.8e-20
LG19	cm	miRNA	3851735	3851824	88.2	-	.	target=mir-137;class=Gene/miRNA;Rfam_id=RF00694;E=6.1e-22
LG19	cm	miRNA	15252593	15252672	90.7	-	.	target=mir-124;class=Gene/miRNA;Rfam_id=RF00239;E=9.8e-24
LG19	cm	miRNA	16045403	16045477	40	-	.	target=mir-26;class=Gene/miRNA;Rfam_id=RF00244;E=2.6e-09
LG19	cm	miRNA	16045403	16045477	74.4	+	.	target=mir-26;class=Gene/miRNA;Rfam_id=RF00244;E=1.8e-19
LG19	cm	miRNA	17554029	17554115	101.5	-	.	target=mir-153;class=Gene/miRNA;Rfam_id=RF00650;E=9.8e-25
LG20	cm	miRNA	2862995	2863076	91.4	-	.	target=mir-338;class=Gene/miRNA;Rfam_id=RF00686;E=5.7e-22
LG20	cm	miRNA	4397693	4397768	73	+	.	target=mir-10;class=Gene/miRNA;Rfam_id=RF00104;E=2.7e-20
LG20	cm	miRNA	16361635	16361717	79.6	+	.	target=mir-338;class=Gene/miRNA;Rfam_id=RF00686;E=5.7e-19
LG21	cm	miRNA	10368543	10368641	95	+	.	target=mir-199;class=Gene/miRNA;Rfam_id=RF00144;E=6.3e-25
LG21	cm	miRNA	11131816	11131897	94.8	-	.	target=mir-338;class=Gene/miRNA;Rfam_id=RF00686;E=7.2e-23
LG21	cm	miRNA	13998670	13998738	75.4	+	.	target=mir-33;class=Gene/miRNA;Rfam_id=RF00667;E=6.1e-19
LG21	cm	miRNA	14907705	14907771	58.1	-	.	target=mir-24;class=Gene/miRNA;Rfam_id=RF00178;E=2.4e-15
LG21	cm	miRNA	14908945	14909024	68	-	.	target=mir-27;class=Gene/miRNA;Rfam_id=RF00644;E=1.2e-16
LG21	cm	miRNA	14909176	14909246	55.9	-	.	target=mir-23;class=Gene/miRNA;Rfam_id=RF00642;E=3.3e-14
LG21	cm	miRNA	16848937	16849004	72.7	+	.	target=mir-33;class=Gene/miRNA;Rfam_id=RF00667;E=5.1e-18
LG21	cm	miRNA	18597568	18597668	84	+	.	target=mir-137;class=Gene/miRNA;Rfam_id=RF00694;E=9.2e-21
LG21	cm	miRNA	20857811	20857884	70.5	-	.	target=mir-181;class=Gene/miRNA;Rfam_id=RF00076;E=3.5e-18
LG21	cm	miRNA	21835986	21836064	73.8	-	.	target=mir-10;class=Gene/miRNA;Rfam_id=RF00104;E=1.1e-20
LG22	cm	miRNA	9834166	9834245	62.3	+	.	target=mir-31;class=Gene/miRNA;Rfam_id=RF00661;E=8.3e-14
LG23	cm	miRNA	8483554	8483644	94.9	-	.	target=mir-129;class=Gene/miRNA;Rfam_id=RF00486;E=3e-24
LG23	cm	miRNA	10393745	10393829	103.6	-	.	target=mir-182;class=Gene/miRNA;Rfam_id=RF00702;E=7.9e-27
LG23	cm	miRNA	10394308	10394385	98.1	-	.	target=mir-96;class=Gene/miRNA;Rfam_id=RF00669;E=1.7e-26
[truncated: 595 more rows]

## Sheet: d
Supplementary Table S2d. The number of coding and non-coding genes on 24 chromosomes in the chromosome-level genome assembly constructed by Hi-C.
chromosomes	coding gene	pseudogene	miRNA	rRNA	tRNA
Contig	45	16	0	46	6
LG01	980	27	11	0	19
LG02	1223	23	8	9	56
LG03	1266	25	5	2	87
LG04	1155	15	17	2	40
LG05	1174	13	16	3	49
LG06	1069	23	8	2	22
LG07	1065	17	12	1	63
LG08	962	18	11	1	57
LG09	1177	23	8	1	25
LG10	1188	37	27	2	63
LG11	884	15	140	3	40
LG12	956	18	17	26	60
LG13	1136	21	19	1	51
LG14	1023	13	20	2	93
LG15	980	21	4	3	32
LG16	913	31	4	1	62
LG17	980	36	13	1	24
LG18	922	21	11	2	16
LG19	739	26	5	1	49
LG20	949	20	3	2	97
LG21	1094	26	10	1	48
LG22	834	44	1	1	98
LG23	645	12	10	1	92
LG24	587	41	6	140	122
total	23946	582	386	254	1371
