# Supplementary material for: Screening of Genes Related to Sex Determination and Differentiation in Mandarin Fish (Siniperca chuatsi)
Source: Int J Mol Sci. 2022 Jul 12;23(14):7692. doi: 10.3390/ijms23147692 (PMC9321114; doi:10.3390/ijms23147692)
Supplement: Supplementary file 1 [file ijms-23-07692-s001.zip › Supplementary File S2.xls]

## Sheet: Sheet1
Supplementary Table S3. The TMP in significantly different genes on chromosome 24 .
GeneID	TPM in ovary	TPM in testis	reads count in ovary	reads count in testis
Schu_LG24G000020	0.09	0	6	5
Schu_LG24G000590	0.74	0	6	6
Schu_LG24G000600	0.03	0	2	5
Schu_LG24G000880	0.05	0	2	3
Schu_LG24G000910	31.72	0	322	2
Schu_LG24G001130	0.1	0	9	16
Schu_LG24G001320	0.61	0	21	3
Schu_LG24G001450	0.14	0	16	0
Schu_LG24G001580	2.44	0	6	1
Schu_LG24G001750	0.28	0	60	84
Schu_LG24G001770	1.01	0	6	4
Schu_LG24G002340	0.3	0	6	1
Schu_LG24G003150	0.1	0	2	2
Schu_LG24G003270	0.36	0	20	7
Schu_LG24G003870	483.7	0	12045	1
Schu_LG24G004630	0.27	0	6	1
Schu_LG24G000050	0	0.1	0	5
Schu_LG24G000120	0	13.2	13	102
Schu_LG24G000160	0	0.05	0	9
Schu_LG24G000810	0	1.15	1	13
Schu_LG24G000860	0	0.68	0	6
Schu_LG24G000940	0	0.45	43	149
Schu_LG24G001080	0	4.63	2	140
Schu_LG24G001200	0	0.24	0	6
Schu_LG24G001330	0	0.17	0	8
Schu_LG24G001350	0	0.57	0	15
Schu_LG24G001380	0	194.17	7	1522
Schu_LG24G001630	0	6.3	1	54
Schu_LG24G001710	0	0.37	0	13
Schu_LG24G001790	0	0.44	3	13
Schu_LG24G001870	0	78.72	0	925
Schu_LG24G002030	0	0.86	0	42
Schu_LG24G002050	0	1.21	0	27
Schu_LG24G002080	0	0.84	0	5
Schu_LG24G002600	0	0.25	0	5
Schu_LG24G002710	0	0.4	0	10
Schu_LG24G002790	0	162.9	5	1278
Schu_LG24G003160	0	0.73	0	25
Schu_LG24G003170	0	1.86	2	33
Schu_LG24G003280	0	1.33	0	6
Schu_LG24G003300	0	0.37	0	7
Schu_LG24G003360	0	0.62	0	28
Schu_LG24G003730	0	0.61	0	8
Schu_LG24G004010	0	0.13	4	12
Schu_LG24G004100	0	0.15	0	10
Schu_LG24G004170	0	0.26	0	11
Schu_LG24G004200	0	0.31	0	12
Schu_LG24G004230	0	51.72	1	2360
Schu_LG24G004260	0	3.59	0	230
Schu_LG24G004370	0	163.79	0	2283
Schu_LG24G004380	0	2.28	1	37
Schu_LG24G004460	0	1.05	0	21
Schu_LG24G004520	0	1.36	0	39
Schu_LG24G004670	0	0.19	0	5
Schu_LG24G004690	0	0.29	0	10
Schu_LG24G004770	0	2.11	0	39
Schu_LG24G004780	0	0.82	0	11
Schu_LG24G004870	0	0.73	0	30
Schu_LG24G004970	0	0.76	0	94
Schu_LG24G005280	0	1.79	0	5
Schu_LG24G005710	0	0.28	0	99
