# Supplementary material for: Screening of Genes Related to Sex Determination and Differentiation in Mandarin Fish (Siniperca chuatsi)
Source: Int J Mol Sci. 2022 Jul 12;23(14):7692. doi: 10.3390/ijms23147692 (PMC9321114; doi:10.3390/ijms23147692)
Supplement: Supplementary file 1 [file ijms-23-07692-s001.zip › Supplementary File S3.xls]

## Sheet: Sheet1
Supplementary Table S4. The primers used in this study.
Gene	Primer Name	Primer Sequence	Length of PCR Product （bp)	Application
β-actin	β-actin-F	CCCTCTGAACCCCAAAGCCA	92	quantitative PCR
	β-actin-R	CAGCCTGGATGGCAACGTACA		routine PCR
LG24G003280	3280-QF1(101)	ATCAGGGTGGAGAGCGGTGT	101	quantitative PCR
	3280-QR1(101)	CACTGCTGGTTGTCGGCG		routine PCR
LG24G003730	3730-QF1(186)	GCTTTATGGCAGCCTGTTTCAC	186	quantitative PCR
	3730-QR1(186)	CGGGTCGGTGGAATCGTT		routine PCR
LG24G003300	3300-QF1(130)	GGTGTACGACCGCCCCAA	130	quantitative PCR
	3300-QR1(130)	GATCATGCGACAAGAGTAAATGTTATC		routine PCR PCR
LG24G004200	4200-QF1(134)	TGAGAACGGCGAAACAGACG	134	quantitative PCR
	4200-QR1(134)	GGTTCCCCAAGTTTGTTATCACG		routine PCR PCR
LG24G004260	4260-QF1(205)	CGGCAGAAGGAGCATCAGC	205	quantitative PCR
	4260-QR1(205)	CCAGAACCCAGGCGAGAGAC		routine PCR PCR
LG24G004770	4770-QF1(103)	GGGCTGGAGTTGCGGGTT	103	quantitative PCR
	4770-QR1(103)	CCTCTTGCTCTTTGGGGCG		routine PCR PCR
LG24G003870	3870-QF1(103)	GACTGAAGAGGCCCTCATCTAC	400/296	quantitative PCR
	3870-QR1(103)	CCCGTGGTTGTTGATGAAGGGG
LG24G003870-isoform1	3870L-QF1(107)	GAAGGAGGCATTATGCGAGCA	107	quantitative PCR
	3870L-QR1(107)	TGTCATGAGACGCAGGGAGAAG
LG24G003870-isoform2	3870S-QF1(144)	GCCACTATCGAAGAGGACTGGCAGTC	144	quantitative PCR
	3870S-QR1(144)	GGTAATTGTGGCCACACAGCTGTC
LG24G003870	3870-FLF	ATGGGGTTCCGAGAGGCGGTTTTGTTAG	1629/1525	full-length cloning
	3870-FLR	TCAGGTACAAACAGCATGTACAGAGGG
	F	CAAACTACATGAGAAACTCTTGGTTGAC	96/106	sex marker
	R	CTTTATCCATAGCCCCTCAGCCTTG
