# Supplementary material for: Screening of Genes Related to Sex Determination and Differentiation in Mandarin Fish (Siniperca chuatsi)
Source: Int J Mol Sci. 2022 Jul 12;23(14):7692. doi: 10.3390/ijms23147692 (PMC9321114; doi:10.3390/ijms23147692)
Supplement: Supplementary file 1 [file ijms-23-07692-s001.zip › Supplementary File S4.xls]

## Sheet: Sheet1
Supplementary Table S5. The comparison result between transcriptome sequencing data of testis (SRR11743001) and ovarian tissue (SRR11743000) from NCBI and genome of the female Siniperca chuatsi constructed in this study.
SRA Data	Total reads	Reads mapped in unique region	Reads mapped to multiple region	Reads with no mapped region
SRR11743000	32098541	2628133（81.88%）	1974312（6.15%）	3842891（11.97%）
SRR11743001	25282537	2150187（85.05%）	1670490（6.61%）	2110175（8.34%）
